# Supplementary material
Source: Research Square preprint supplement (doi:10.21203/rs.3.rs-9700335/v1)
Supplement: Supplementary file 1 [file 4ca5a35b85669639e63de40a.xlsx]

## Sheet: Sheet1
Teacher Support 1	Teacher Support 2	Teacher Support 3	Teacher Support 4	Teacher Support 5	Teacher Support 6	Teacher Support 7	Growth Mindset 1	Growth Mindset 2	Growth Mindset 3	Growth Mindset 4	Learning Attitude 1	Learning Attitude 2	Learning Attitude 3	Learning Attitude 4	Learning Attitude 5	Learning Attitude 6	Learning Attitude 7	Math Anxiety 1	Math Anxiety 2	Math Anxiety 3	Math Anxiety 4	Math Anxiety 5	Math Anxiety 6	Self-Efficacy 1	Self-Efficacy 2	Self-Efficacy 3	Self-Efficacy 4	Self-Efficacy 5	Self-Efficacy 6	Self-Efficacy 7	Self-Efficacy 8	Academic Achievement	Group
4	4	4	4	4	4	4	4	4	4	3	5	3	4	4	5	4	4	2	1	2	1	1	1	5	3	4	4	4	3	4	4		1
4	3	3	3	3	3	4	5	5	5	5	4	3	5	2	5	3	3	1	1	2	2	1	1	5	5	5	4	4	4	4	2		1
4	4	4	4	4	5	5	5	5	5	5	5	5	5	5	5	5	4	3	2	1	2	1	1	5	4	4	4	5	5	4	3		1
3	3	5	5	5	5	4	5	5	5	5	5	5	5	5	5	5	5	1	1	1	1	1	1	5	3	5	5	5	5	5	5		1
1	2	3	3	3	3	3	5	5	3	3	5	5	4	3	3	4	4	1	1	1	2	2	1	3	4	4	5	5	5	4	5		1
3	3	5	5	5	4	5	4	4	3	4	4	3	5	5	4	5	4	2	1	1	1	1	1	5	5	5	4	5	5	4	5		1
5	5	5	5	5	5	5	5	5	5	5	5	5	5	5	5	5	5	1	1	1	1	1	1	5	5	4	5	5	5	5	5		1
2	2	2	4	2	2	3	3	3	3	1	5	5	5	5	5	5	5	2	1	1	1	1	2	5	4	5	3	4	5	2	3		1
3	3	5	5	3	3	4	4	4	4	4	5	5	5	5	5	5	5	1	1	1	1	1	3	4	4	3	3	4	2	4	5		1
4	4	4	5	5	5	5	5	5	5	5	5	5	5	5	4	5	5	1	1	1	2	1	2	5	5	4	5	5	5	5	5		1
2	2	5	3	2	2	2	2	5	5	5	4	5	3	3	5	4	4	2	2	2	2	2	5	2	2	2	2	5	4	4	3		1
2	2	3	4	3	2	3	4	5	3	2	3	3	5	5	3	4	4	1	2	1	2	2	1	3	4	4	3	4	5	3	4		1
3	3	2	5	4	4	3	5	5	5	5	5	5	5	5	4	5	5	1	1	2	1	1	1	5	5	5	5	5	1	5	5		1
4	4	4	4	4	4	4	4	4	4	4	5	4	5	5	4	5	5	1	1	3	2	2	2	4	4	3	3	4	5	5	5		1
2	3	3	5	4	5	5	3	3	3	3	5	5	4	4	4	4	3	3	1	2	5	3	2	5	4	5	3	4	4	4	4		1
4	4	4	4	4	4	4	4	4	4	3	4	4	4	4	3	4	4	3	2	2	3	2	2	3	3	3	5	5	3	3	3		1
3	3	4	3	3	3	5	5	3	3	3	3	5	3	3	3	5	5	1	1	2	3	2	2	4	3	3	2	4	4	3	5		1
5	5	5	5	5	5	5	5	5	5	5	5	5	5	5	5	5	5	1	1	1	1	1	1	5	5	5	5	3	5	5	4		1
5	5	5	5	5	5	5	5	5	5	5	5	5	5	5	5	5	5	3	1	1	1	1	2	4	5	5	5	5	5	5	5		1
3	3	4	4	4	4	5	5	5	4	4	4	5	5	5	5	4	4	3	3	2	2	2	2	5	5	5	5	5	3	5	4		1
3	3	2	3	2	2	2	2	3	1	2	3	3	5	5	5	4	3	3	1	2	4	3	2	3	4	4	2	2	4	4	2		1
1	3	4	3	3	1	3	1	5	1	1	5	5	5	5	5	5	5	1	1	1	1	1	1	5	4	5	5	4	5	5	5		1
4	4	4	4	4	4	5	5	5	5	5	5	5	5	5	3	5	5	2	1	2	1	1	2	4	2	4	3	5	4	5	5		1
2	2	2	2	2	2	3	2	2	2	2	5	5	3	5	5	4	3	3	3	2	4	2	2	5	5	5	4	3	4	4	2		1
4	3	3	4	4	4	2	4	4	2	1	5	5	4	4	5	3	3	3	2	2	1	2	2	4	4	4	4	4	4	4	2		1
4	4	5	5	4	4	5	5	5	5	5	5	5	5	5	5	5	5	1	1	2	1	1	2	5	5	5	5	5	4	5	5		1
3	3	4	4	3	3	3	3	4	3	3	4	3	5	4	3	4	5	3	1	3	1	1	1	4	3	3	3	4	4	4	4		1
5	5	5	5	5	5	5	5	5	5	5	5	5	5	5	5	5	5	1	1	1	1	1	1	5	5	3	5	5	5	5	5		1
4	5	5	5	5	5	5	5	5	5	5	5	5	5	5	5	5	5	1	1	1	1	1	3	5	4	5	5	5	3	5	4		1
5	5	5	5	5	5	5	5	5	5	5	5	5	5	5	5	5	5	1	1	1	1	1	1	5	5	5	5	5	5	5	5		1
2	2	3	4	4	4	4	5	5	5	5	3	3	3	3	2	3	3	2	2	2	2	2	2	4	3	2	3	3	3	4	4		1
4	4	4	4	4	4	4	4	5	4	4	4	4	3	3	3	4	4	3	2	3	2	2	1	4	3	3	3	4	4	4	4		1
4	3	2	4	3	4	3	5	5	5	5	5	5	5	5	5	5	5	4	2	2	1	1	1	5	4	4	5	5	3	3	5		1
3	3	1	2	2	1	4	5	5	4	2	5	5	5	5	5	5	5	1	1	1	1	1	1	5	5	5	4	5	5	2	5		1
3	3	3	3	3	3	3	5	5	5	5	5	5	5	5	5	5	5	5	5	4	3	3	1	5	5	3	5	4	5	5	4		1
3	3	2	3	2	2	3	1	2	2	3	3	2	3	2	2	2	3	3	2	2	3	2	1	3	2	3	4	3	3	2	3		1
4	4	4	4	4	4	4	5	5	5	4	5	4	4	4	5	4	5	1	1	1	1	1	1	5	4	5	5	5	5	5	5		1
3	1	3	3	1	2	4	3	3	3	3	5	5	5	5	5	5	5	1	1	1	1	1	1	5	3	5	5	5	5	2	4		1
3	4	4	4	4	4	4	4	3	4	3	4	2	3	3	3	3	3	2	2	1	2	2	1	3	3	3	3	4	4	3	4		1
5	5	5	5	5	5	5	5	5	5	5	5	5	5	5	5	5	5	3	1	1	1	1	1	5	5	5	3	5	4	3	3		1
2	3	3	3	3	3	3	5	4	4	3	5	5	5	5	3	3	4	3	2	2	3	3	1	2	2	3	2	4	3	3	3		1
4	5	5	5	3	5	5	5	5	5	5	5	5	5	5	5	5	5	1	1	1	1	1	1	5	5	5	5	5	4	5	5		1
2	2	5	5	5	4	4	3	4	3	3	5	4	5	3	4	3	3	2	1	2	1	1	4	5	4	5	5	5	5	5	5		1
2	2	4	4	2	3	2	4	4	4	4	3	3	5	5	5	3	1	2	1	2	2	2	4	3	4	4	4	2	4	2	4		1
4	4	5	5	4	5	5	5	5	5	5	5	5	5	5	5	5	5	1	1	2	1	1	1	5	5	5	5	5	5	5	5		1
5	5	5	5	5	5	5	5	5	5	5	5	5	5	5	5	5	5	1	1	1	1	1	1	5	5	5	5	5	5	5	5		1
2	4	5	5	1	5	5	5	5	1	1	3	5	5	5	5	5	5	1	1	1	1	1	5	5	5	5	5	5	5	5	5		1
4	4	4	4	4	4	4	4	4	4	4	4	4	3	3	3	3	3	1	1	1	1	1	1	5	5	5	5	5	4	5	5		1
2	2	3	4	3	4	4	4	4	4	4	4	3	4	4	3	4	4	4	2	2	2	2	4	4	3	3	3	4	4	4	4		1
3	2	5	5	5	5	5	5	5	5	5	5	5	5	5	5	5	5	1	1	1	1	1	1	5	5	5	5	5	5	5	5		1
4	4	4	5	4	4	3	4	4	4	1	3	2	4	4	3	3	3	1	1	1	1	1	3	3	2	2	3	3	3	4	3		1
4	4	4	4	4	4	4	5	2	4	4	5	5	5	5	5	4	4	5	2	2	2	2	2	5	3	3	3	4	2	5	5		1
3	3	3	3	3	4	3	3	4	4	3	5	3	5	5	5	5	5	4	1	3	3	3	2	5	4	3	5	5	3	3	5		1
3	3	3	4	2	3	3	3	3	3	3	4	3	4	4	3	3	3	2	2	5	2	1	3	4	4	4	4	3	3	4	3		1
5	5	5	5	5	5	5	5	5	5	5	5	5	5	5	4	4	5	1	1	1	1	1	1	5	5	5	5	5	5	5	5		1
4	4	3	4	5	4	4	4	4	4	4	4	4	4	4	4	4	4	1	1	1	1	1	3	5	5	3	4	5	4	5	4		1
2	3	2	4	3	3	3	5	5	5	5	5	5	5	5	5	5	5	1	1	1	1	1	5	5	5	5	5	5	5	5	5		1
3	3	3	3	3	5	5	5	5	5	5	5	5	5	5	5	5	5	1	1	1	1	1	2	5	5	5	5	5	4	5	5		1
3	3	3	3	3	3	3	4	4	4	4	4	4	4	4	4	4	4	2	2	2	2	2	2	4	4	4	4	4	4	4	4		1
4	4	4	4	4	4	4	5	4	4	4	4	5	5	3	3	4	3	1	1	3	1	2	2	5	4	5	4	4	5	4	4		1
3	3	3	4	4	3	4	4	4	4	4	5	5	5	5	5	5	4	1	1	1	1	1	1	4	2	3	4	4	5	3	4		1
2	3	3	3	3	3	3	3	3	3	3	4	4	3	4	2	3	5	1	1	1	1	1	1	3	3	3	2	3	4	3	5		1
5	5	5	5	5	5	5	5	5	5	5	5	5	3	3	5	4	4	1	1	1	1	1	1	5	5	5	5	5	5	5	5		1
5	4	4	4	3	5	5	5	5	5	3	5	5	5	5	5	4	5	2	1	1	1	1	3	5	5	4	4	5	5	5	5		1
4	5	4	5	5	4	5	4	4	5	4	4	3	5	4	4	5	5	2	1	5	1	1	5	4	3	3	3	4	3	4	5		1
4	4	5	5	5	5	5	5	5	5	5	5	3	5	5	3	5	5	1	1	1	1	1	1	5	5	5	5	5	5	5	5		1
3	5	5	5	5	5	5	5	5	5	5	5	5	5	5	5	5	5	1	1	1	1	1	1	3	5	5	5	5	5	5	5		1
4	4	5	5	5	5	5	5	4	5	4	4	4	4	4	4	3	2	2	3	2	1	2	2	5	5	2	5	3	4	5	4		1
4	4	4	5	5	4	5	5	5	5	4	5	3	4	5	4	5	5	4	1	5	5	2	5	4	3	2	4	5	4	3	4		1
5	5	5	5	5	5	5	5	5	5	5	5	3	4	4	4	4	3	2	1	1	1	1	1	5	5	5	5	5	5	5	5		1
4	4	5	5	5	5	5	5	5	5	5	5	5	5	5	5	5	5	1	2	1	3	1	5	5	5	3	3	5	5	4	5		1
4	5	4	3	3	4	4	4	4	4	4	5	4	3	3	3	4	4	3	3	3	3	2	2	5	3	2	3	4	3	4	4		1
3	3	3	4	4	4	4	3	3	3	3	3	3	4	4	3	4	4	3	2	2	3	3	4	4	4	3	3	4	3	3	3		1
5	5	5	5	5	5	5	5	5	5	5	5	5	5	5	5	5	5	1	1	1	1	1	1	5	5	5	5	5	5	5	5		1
3	3	4	4	3	4	4	4	4	4	3	4	3	4	3	3	4	4	1	2	3	3	2	4	4	4	3	4	4	4	3	3		1
3	3	3	3	3	3	5	5	5	5	1	5	3	3	3	4	3	5	1	1	5	1	1	1	5	3	3	3	4	3	5	3		1
1	1	3	3	2	1	1	3	5	5	5	5	3	4	3	4	4	4	1	1	1	1	1	5	3	1	5	3	4	5	5	5		1
3	3	3	3	3	3	4	5	5	5	5	3	4	4	4	4	4	4	1	1	1	1	1	3	4	4	4	4	4	4	4	5		1
3	4	4	4	4	3	4	4	4	4	4	4	4	5	2	4	4	3	4	1	5	2	2	5	3	4	4	5	3	5	5	4		1
5	5	5	5	5	5	5	5	5	5	5	4	5	5	5	5	5	5	1	1	1	1	1	5	5	5	5	5	5	5	5	5		1
5	5	5	5	5	5	5	5	5	5	3	5	5	5	5	5	5	5	3	1	5	3	3	5	5	4	5	3	4	5	5	3		1
1	1	3	2	2	2	2	4	4	4	4	4	4	4	3	4	4	4	1	1	1	1	1	1	4	3	3	3	3	3	3	4		1
3	3	3	3	3	3	5	3	4	4	2	2	4	4	3	2	3	4	2	2	4	3	4	4	4	3	5	3	4	3	5	2		1
1	1	5	5	5	5	5	5	5	5	5	5	5	5	5	5	5	5	1	1	5	1	1	5	5	5	5	5	5	5	5	5		1
3	2	2	2	3	2	4	3	4	2	3	5	4	5	5	2	4	5	1	1	1	1	1	1	2	4	4	4	4	5	4	4		1
4	3	3	5	3	4	4	5	5	5	5	5	5	4	5	3	5	5	1	1	1	1	1	1	5	5	4	5	5	5	5	3		1
4	4	4	4	4	4	4	4	4	4	4	4	3	4	4	4	3	3	2	2	3	2	2	3	3	3	3	3	3	3	3	3		1
3	4	5	5	5	5	5	5	5	5	5	5	5	5	5	4	5	5	1	1	1	1	1	3	5	5	5	5	5	5	5	5		1
5	5	5	5	5	5	5	5	5	5	5	5	5	5	5	4	5	5	3	2	5	2	2	2	5	5	5	5	5	5	5	5		1
4	4	3	3	3	3	3	4	5	3	4	4	5	2	2	1	3	1	4	2	5	1	1	5	5	3	4	4	5	3	5	3		1
4	3	3	3	3	3	5	4	5	4	4	5	5	5	5	5	5	5	5	5	1	5	5	5	5	5	4	4	5	4	4	1		1
4	5	4	5	5	5	5	5	5	5	5	5	4	4	4	4	4	5	1	1	1	1	1	3	5	3	3	4	3	5	5	3		1
4	5	5	5	4	5	5	5	5	5	5	5	5	5	5	5	5	5	1	1	1	1	1	2	2	2	5	3	5	3	5	4		1
3	3	3	3	3	3	3	4	4	4	4	4	4	4	4	3	3	4	2	2	1	1	1	3	4	3	3	3	4	3	3	3		1
2	4	2	4	4	2	3	3	3	3	3	2	4	4	4	4	4	4	1	1	1	1	1	1	3	3	3	3	3	2	3	3		1
4	3	3	4	3	4	3	5	5	5	4	5	4	3	5	3	5	5	1	1	1	1	1	1	4	3	3	4	4	4	3	4		1
4	4	4	4	4	4	4	5	5	4	5	5	5	5	5	5	5	5	2	2	2	2	2	2	4	3	4	4	3	3	5	2		1
3	3	4	3	4	3	4	4	4	4	4	4	3	4	4	3	3	4	3	3	4	3	3	4	4	3	3	3	4	4	4	3		1
4	4	5	5	5	5	5	5	5	5	5	5	5	5	5	3	5	5	3	2	2	1	1	3	3	5	5	5	5	5	5	5		1
3	3	4	3	2	2	2	3	4	4	4	2	2	5	3	4	3	3	3	3	3	3	3	3	3	3	3	3	5	5	5	3		1
4	4	3	3	4	3	3	4	4	4	4	4	3	3	4	4	3	4	3	3	4	3	3	4	3	3	3	3	4	3	4	3		1
3	3	4	4	3	3	4	4	4	4	4	3	3	5	5	4	3	4	4	3	5	4	3	5	4	4	3	3	4	4	5	5		1
5	5	5	5	5	5	5	5	5	5	5	5	5	5	5	5	5	5	3	1	4	1	1	1	5	5	5	5	5	5	5	5		1
5	5	5	5	5	5	5	5	5	5	5	5	5	4	4	4	5	5	1	1	1	1	1	1	5	5	5	5	5	5	5	5		1
3	4	3	3	5	3	5	5	5	5	5	5	3	5	5	1	3	5	5	1	5	1	1	5	4	3	3	3	4	4	4	3		1
3	3	3	3	3	3	3	5	5	5	5	5	5	5	5	3	5	5	1	1	5	1	1	5	5	5	3	4	5	5	5	5		1
2	2	3	4	3	3	2	3	3	3	3	3	3	3	3	3	3	3	3	3	3	3	3	3	4	4	4	4	3	3	3	4		1
3	3	5	4	3	3	4	5	5	5	5	5	5	5	5	5	5	5	2	1	2	2	2	2	5	5	5	5	5	5	5	5		1
3	4	4	4	4	4	4	5	5	5	5	5	3	5	5	5	5	5	3	3	1	1	1	4	5	5	3	3	3	5	5	5		1
5	5	3	5	5	5	5	5	5	4	4	4	5	4	5	3	4	5	2	1	1	1	1	4	5	5	5	5	5	5	4	4		1
4	4	5	5	5	5	5	5	5	5	4	4	5	4	4	4	4	5	2	1	1	1	1	5	4	4	4	4	4	5	5	5		1
3	5	5	5	5	5	5	5	5	5	5	5	5	4	5	5	5	5	1	1	1	1	1	1	5	5	5	5	5	5	5	5		1
2	3	3	3	3	2	3	4	4	4	4	4	4	4	4	4	2	4	5	3	1	1	1	1	4	4	3	3	2	4	4	4		1
3	4	3	4	4	4	4	4	4	4	4	4	3	3	3	2	3	3	3	2	3	2	2	5	5	4	3	4	4	3	4	4		1
3	3	3	3	3	3	3	5	5	5	5	5	5	5	5	5	5	5	1	1	1	1	1	1	4	5	3	3	4	4	4	3		1
5	5	5	5	5	5	5	5	5	5	5	5	5	5	5	5	5	5	1	1	1	1	1	1	5	5	5	5	5	5	5	5		1
5	5	5	5	5	5	5	3	3	3	3	3	3	5	5	3	4	4	3	3	5	5	5	5	3	3	3	3	3	3	3	3		1
3	4	4	3	3	4	4	4	4	4	5	4	5	5	4	3	4	5	1	1	1	1	1	4	4	3	2	3	4	4	4	4		1
4	3	2	5	2	2	5	5	5	5	5	3	4	5	5	3	3	5	5	1	5	4	1	5	4	4	2	3	5	5	2	3		1
5	5	5	5	5	5	5	5	5	5	5	5	5	5	5	5	5	5	1	1	1	1	1	1	5	5	5	5	5	5	5	5		1
2	2	3	4	4	3	5	4	4	4	4	4	3	3	4	3	5	4	4	3	1	1	1	3	5	5	4	3	5	5	5	4		1
2	2	3	3	3	3	3	5	4	4	3	4	3	4	4	3	4	3	1	1	4	3	3	4	5	4	3	3	4	4	4	4		1
4	5	4	5	4	5	5	5	5	5	5	4	3	5	5	3	5	5	3	1	5	2	3	5	5	4	3	1	3	3	3	3		1
4	5	5	5	5	5	5	5	5	5	5	5	4	5	5	5	5	5	4	1	2	1	1	3	5	4	3	4	5	5	5	4		1
3	3	3	3	5	3	3	5	5	5	5	5	4	5	5	4	5	4	2	1	5	1	1	5	5	5	5	4	5	5	5	2		1
2	2	2	3	3	2	3	3	3	3	3	2	2	3	3	3	3	3	3	3	3	3	4	4	4	2	3	2	3	2	2	2		1
4	4	4	4	4	4	4	5	5	5	5	5	5	5	5	5	5	5	1	1	1	1	1	1	5	5	1	5	5	5	5	5		1
3	5	5	5	5	5	5	5	5	5	5	5	5	5	5	3	4	3	3	1	1	1	1	3	4	5	4	4	5	5	5	5		1
3	3	5	3	3	3	3	5	5	5	5	5	5	5	5	5	2	2	1	1	1	1	1	1	5	5	5	5	5	5	5	5		1
4	5	5	5	5	5	5	5	5	5	5	4	5	5	5	5	4	3	4	1	1	1	1	5	4	5	3	4	5	4	4	4		1
4	3	3	4	3	3	3	4	3	3	3	4	3	3	4	3	3	3	1	1	2	1	1	1	5	4	5	3	4	3	4	3		1
3	4	4	5	4	5	5	4	4	3	3	3	3	4	4	2	3	2	2	1	1	1	1	3	5	3	3	3	4	4	5	4		1
3	3	4	4	3	3	4	5	5	5	5	5	3	3	3	3	5	5	3	1	1	3	4	4	4	4	3	3	3	2	4	5		1
4	3	4	4	4	4	4	4	4	4	4	5	3	3	3	4	3	3	1	1	1	1	1	2	4	3	4	3	4	4	3	4		1
4	3	3	4	4	4	4	5	5	5	5	5	4	4	4	4	5	4	1	1	2	1	1	1	4	4	4	4	4	4	4	5		1
4	4	5	5	5	5	5	5	5	4	5	5	3	5	5	2	4	5	4	1	5	1	1	5	5	4	4	4	5	4	5	4		1
4	4	4	5	4	4	5	5	5	4	4	5	3	5	5	3	4	5	4	1	1	1	1	4	4	4	3	4	4	4	4	4		1
1	2	2	5	5	4	5	5	5	5	5	5	3	5	5	5	5	5	5	1	2	1	1	5	5	5	5	5	5	5	5	5		1
3	3	3	3	3	3	3	3	3	4	4	4	3	4	5	3	4	4	4	3	3	3	3	4	4	3	4	3	3	3	3	3		1
4	4	4	4	4	3	5	5	5	5	5	3	5	5	5	3	5	5	3	2	3	3	2	5	5	5	4	4	5	3	4	5		1
3	3	3	4	4	4	4	2	3	4	3	4	3	5	3	3	3	3	4	3	2	4	3	3	3	3	3	4	3	3	4	4		1
3	4	3	5	5	4	4	5	5	5	5	5	5	5	4	5	5	5	1	1	1	1	2	1	5	5	5	5	4	4	5	4		1
5	5	5	5	5	5	5	5	5	5	5	3	3	3	3	3	3	3	2	1	1	1	1	1	5	5	5	5	5	3	5	5		1
3	4	3	4	4	3	4	4	4	4	4	3	2	1	1	3	1	4	3	2	3	2	2	2	4	5	3	4	4	4	4	5		1
3	5	5	5	5	5	5	5	4	4	4	5	5	4	5	3	3	5	2	1	4	1	1	4	4	3	4	3	4	4	4	3		1
5	5	5	5	5	5	5	5	5	5	5	2	3	3	2	2	2	2	1	1	5	1	1	5	4	5	5	5	5	5	5	5		1
2	3	2	3	4	4	3	4	4	4	4	3	3	3	2	3	3	4	3	3	2	2	2	3	4	4	3	3	4	3	4	5		1
5	5	5	5	5	5	5	5	5	5	5	3	3	3	3	2	2	3	1	1	1	1	1	1	5	5	5	5	5	5	5	5		1
1	5	5	5	4	4	4	5	4	4	4	3	3	3	3	3	3	3	5	1	4	4	4	4	5	5	4	5	5	5	5	5		1
4	4	4	5	5	5	1	4	5	5	5	3	3	3	3	3	3	3	1	1	1	1	1	1	5	5	4	5	5	5	5	5		1
3	3	5	3	3	3	5	3	3	3	1	3	3	5	2	3	3	2	1	1	1	1	1	1	3	5	5	5	3	5	3	5		1
5	5	5	5	5	5	5	5	5	5	5	3	2	2	3	3	2	3	1	1	1	1	1	1	5	5	5	5	5	5	5	5		1
2	2	5	3	3	1	5	4	3	3	5	5	5	2	2	2	2	2	1	2	5	2	2	2	5	5	4	4	5	5	5	5		1
5	5	5	5	5	5	5	5	5	5	5	5	5	5	5	5	5	5	3	1	1	1	1	3	5	5	5	5	5	5	5	1		1
3	3	4	3	3	3	4	4	4	3	4	3	3	3	4	3	2	3	4	4	3	3	4	3	3	3	1	1	3	1	2	1		1
4	5	5	5	5	5	5	5	5	5	4	5	4	2	2	4	5	4	2	1	4	1	1	4	4	4	3	3	4	4	5	5		1
3	5	4	5	5	3	5	5	5	5	3	5	5	5	5	3	3	5	1	1	1	1	1	1	4	3	3	4	4	5	4	5		1
3	3	3	4	3	4	3	4	4	4	3	4	4	4	4	3	3	4	2	1	5	2	2	5	3	3	3	3	2	3	3	3		1
4	4	5	5	4	4	4	4	4	4	4	3	3	3	3	3	3	3	3	3	3	3	3	3	3	3	3	3	3	3	3	3		1
4	4	4	4	5	5	5	5	5	5	5	5	5	4	4	5	4	5	3	3	2	3	1	1	4	4	3	4	3	3	4	5		1
2	2	5	3	2	2	3	4	4	3	3	4	3	3	3	3	3	3	2	3	5	1	2	5	5	3	5	5	3	4	3	4		1
3	4	4	4	5	4	4	5	5	5	5	5	4	4	4	5	5	5	1	1	1	1	1	2	5	5	4	4	3	5	5	5		1
5	5	5	5	5	5	5	3	5	5	5	2	2	5	2	3	3	3	1	1	1	1	1	5	5	5	3	5	3	5	5	5		1
3	3	3	3	3	3	5	5	4	5	4	2	4	5	4	5	4	3	4	2	4	2	4	2	3	4	4	5	5	4	5	5		1
3	4	5	4	4	5	5	5	5	5	5	2	4	5	5	3	3	3	5	2	2	3	5	5	5	4	4	3	5	4	3	3		1
1	1	1	1	1	1	1	3	2	2	2	3	4	3	3	3	3	3	2	2	4	3	3	2	3	2	3	2	3	2	2	2		1
5	5	5	5	5	5	5	5	5	5	5	2	3	2	3	4	3	3	1	1	1	1	1	1	5	5	5	5	5	5	5	5		1
4	4	4	5	4	4	4	5	5	5	5	2	2	2	3	4	4	5	2	1	1	1	1	5	3	4	4	4	5	3	5	5		1
5	5	5	5	5	5	5	5	5	5	5	3	3	3	3	3	2	2	1	1	5	1	1	4	5	5	5	5	3	3	3	5		1
2	2	3	2	2	2	4	3	4	3	3	3	3	3	3	3	3	3	3	2	2	2	2	4	3	3	1	3	4	4	3	3		1
1	5	5	5	5	5	5	5	5	5	5	4	3	3	3	3	5	5	1	1	1	1	1	1	5	5	4	5	5	5	5	5		1
5	5	5	5	5	5	5	5	5	5	1	5	5	3	3	3	3	5	2	2	2	2	2	2	5	1	3	3	1	1	5	5		1
3	3	3	3	3	4	4	5	5	5	5	4	4	3	3	3	3	3	1	1	2	1	1	2	5	4	4	4	4	5	4	4		1
4	4	4	4	4	4	4	3	4	4	4	4	3	3	4	4	4	4	3	3	3	3	3	3	4	4	3	3	3	3	3	3		1
5	5	5	5	5	5	5	5	5	5	5	3	3	3	4	4	3	5	1	1	1	1	1	3	5	5	4	4	5	4	4	4		1
3	3	4	4	3	4	3	5	5	5	5	5	3	3	3	5	5	3	3	1	3	1	1	3	5	2	5	3	5	2	5	4		1
5	5	5	4	5	4	5	5	5	4	4	5	4	4	4	5	5	3	2	2	5	2	2	2	5	5	3	4	3	3	3	3		1
3	3	5	5	3	3	5	4	3	3	4	4	1	3	5	5	3	3	1	1	1	1	1	5	5	4	4	3	2	4	3	5		1
3	3	3	3	3	3	3	3	3	3	3	3	3	5	3	3	3	3	2	2	2	2	2	3	5	5	4	5	5	5	5	5		1
1	1	4	4	4	4	3	5	5	5	5	2	2	2	2	2	2	5	5	5	5	5	5	5	3	4	5	4	3	5	4	4		1
4	5	4	5	4	4	5	5	5	4	4	2	4	3	3	2	4	4	1	1	1	1	1	1	4	3	3	3	4	3	4	4		1
3	3	5	5	5	5	5	5	5	5	5	5	5	5	4	4	4	3	1	1	3	2	1	3	5	5	5	5	3	5	5	5		1
3	3	3	2	1	3	3	5	5	5	5	2	2	2	3	3	3	3	1	1	1	1	1	1	3	3	3	4	2	5	5	2		1
4	5	3	4	4	3	4	5	5	5	5	3	3	3	3	3	3	3	2	2	5	1	2	3	5	5	5	5	5	5	3	5		1
3	3	3	3	3	3	3	3	3	3	3	1	1	3	3	3	3	4	5	1	3	5	1	3	5	5	5	3	1	3	3	3		1
3	3	3	3	3	3	3	2	3	3	3	3	3	3	3	3	3	3	4	2	2	2	2	3	3	3	3	3	3	3	3	3		1
4	4	4	4	4	3	3	4	4	4	4	2	2	2	2	2	2	2	4	3	4	3	2	4	4	5	4	4	4	4	4	4		1
5	5	5	5	5	5	5	5	5	5	5	2	2	4	1	1	1	2	1	1	1	1	1	3	5	5	5	5	5	5	5	5		1
3	4	5	4	3	3	5	5	4	3	3	4	5	5	5	1	2	1	4	3	1	1	1	1	5	4	2	3	5	4	3	5		1
5	3	3	2	3	3	3	5	5	5	1	4	4	4	4	4	4	1	2	2	3	3	3	3	4	4	4	4	4	4	4	4		1
3	3	3	3	3	4	3	3	3	3	3	3	2	2	1	1	4	4	5	3	4	3	3	4	5	5	4	4	4	4	4	4		1
3	3	3	3	4	4	4	3	3	3	3	4	3	4	3	4	4	4	2	2	2	2	2	2	4	3	4	3	4	4	3	3		1
3	3	3	3	3	3	4	3	3	2	3	2	5	2	2	5	5	5	5	3	5	5	5	5	5	3	2	1	5	5	2	1		1
4	3	3	3	3	3	3	3	3	3	3	2	3	1	1	5	4	4	1	1	5	1	1	5	3	2	3	2	3	5	5	5		1
4	4	5	5	5	5	5	3	3	3	4	2	2	2	2	2	2	5	3	3	3	3	3	3	4	3	3	3	4	3	3	2		1
2	2	3	2	3	3	3	4	4	4	2	2	4	4	3	3	3	5	2	1	5	1	1	5	5	3	5	4	5	4	1	3		1
3	5	5	5	5	5	5	3	2	3	3	3	3	3	3	3	3	3	2	2	2	2	2	2	3	3	5	2	3	5	5	3		1
3	3	4	3	2	4	4	3	3	3	4	2	3	2	3	2	2	3	3	5	5	3	3	5	2	4	4	3	5	5	4	3		1
4	5	5	5	5	5	5	3	3	4	4	5	3	4	3	3	4	4	3	2	2	2	2	3	4	4	4	3	4	4	4	3		1
3	3	3	3	3	3	3	5	5	5	5	4	3	4	4	3	3	4	3	3	5	4	3	5	4	3	2	1	4	3	2	3		1
3	3	2	3	3	3	5	2	3	3	3	5	3	5	4	2	5	5	2	1	2	1	1	3	3	3	2	3	3	3	3	3		1
3	3	3	3	4	3	4	3	3	4	3	4	4	4	4	4	4	4	3	3	3	3	3	3	3	3	3	3	4	3	3	3		1
3	3	3	4	4	4	4	3	4	4	4	5	2	2	2	3	2	5	1	1	4	3	1	4	3	3	3	4	4	4	3	3		1
3	3	2	3	3	3	3	5	3	3	3	5	5	2	2	2	3	3	1	1	1	1	1	1	3	3	3	3	3	3	3	3		1
3	3	3	3	4	3	4	4	4	4	4	3	1	1	1	1	2	3	3	2	4	4	3	3	3	3	2	3	3	3	3	4		1
3	3	3	4	4	4	2	4	4	3	3	3	2	1	1	3	1	1	1	1	1	1	1	5	3	3	3	3	4	3	4	4		1
3	3	3	3	3	3	3	5	5	5	5	5	3	5	5	5	5	5	3	3	1	3	3	2	3	3	3	4	4	4	4	4		1
3	2	3	3	3	3	3	4	4	4	3	4	4	4	3	3	2	3	2	1	1	1	1	1	4	4	3	4	4	4	4	4		1
3	3	3	4	3	3	4	5	5	5	3	4	4	4	4	4	4	4	2	2	5	1	1	5	5	3	3	3	3	3	3	3		1
3	3	4	4	4	5	5	5	5	5	3	2	2	2	2	2	2	2	3	1	1	1	1	1	5	5	5	5	5	5	5	5		1
5	5	5	5	1	5	5	5	5	5	5	2	3	3	2	1	2	2	1	1	1	1	1	5	3	3	2	3	3	3	5	5		1
3	3	4	5	5	5	5	4	4	4	4	5	4	4	4	4	4	4	1	1	1	1	1	1	3	3	3	3	4	3	4	5		1
5	5	5	5	5	5	5	5	5	5	5	2	2	2	2	2	2	3	1	1	1	1	1	1	3	3	3	4	4	4	5	5		1
4	4	5	5	5	5	5	5	5	5	4	2	2	2	2	4	4	3	1	1	5	1	1	2	3	3	2	3	3	3	5	5		1
1	1	4	3	1	3	2	5	5	5	5	4	4	3	4	4	3	2	1	1	5	1	1	5	3	3	2	3	3	3	5	5		1
1	5	5	5	5	5	5	5	5	5	5	5	5	5	5	5	3	2	1	1	1	1	1	1	3	3	3	3	4	3	5	5		1
3	4	5	5	5	3	3	5	5	5	5	5	1	1	1	1	2	1	3	1	1	1	1	5	3	3	3	4	4	4	5	5		1
5	5	5	5	5	5	5	5	5	5	5	5	5	5	5	5	2	1	1	1	1	1	1	1	3	3	2	3	3	3	5	5		1
3	3	4	4	3	5	5	5	5	5	3	3	4	5	5	3	2	1	1	1	3	1	1	4	3	3	3	3	4	3	3	5		1
3	3	5	5	3	5	5	5	5	5	4	5	5	5	5	5	2	1	1	1	1	1	1	1	3	3	3	4	4	4	5	4		1
5	5	5	5	5	5	5	5	5	5	5	5	5	5	5	5	2	1	1	1	1	1	1	1	3	3	3	3	4	3	5	5		1
2	2	2	3	2	2	3	3	3	3	3	3	3	4	4	3	2	3	2	1	5	1	1	4	3	3	3	4	4	4	2	3		1
4	4	4	4	4	4	4	5	5	5	5	5	5	5	5	5	2	2	1	1	4	1	1	5	3	3	2	3	3	3	5	5		1
5	5	4	5	5	5	4	3	3	4	2	5	4	4	3	2	3	2	1	2	5	1	2	4	3	3	3	3	4	3	5	4		1
5	5	5	5	5	5	5	5	5	5	5	5	5	5	5	5	5	2	1	1	1	1	1	1	3	3	3	4	4	4	5	5		1
5	5	5	5	5	5	5	3	5	5	5	5	5	5	5	4	5	2	1	1	1	1	1	1	3	3	3	3	4	3	3	3		1
3	3	4	4	3	4	3	3	5	4	4	4	4	5	5	4	4	2	2	1	5	1	1	5	3	3	3	4	4	4	3	4		1
3	3	2	5	3	2	5	4	4	5	3	5	4	4	5	3	5	2	1	1	1	1	1	1	4	5	3	3	3	3	4	4		1
5	5	5	5	5	5	5	5	5	5	5	5	3	5	4	2	5	2	1	1	1	1	1	1	3	3	2	3	3	3	5	5		1
5	5	5	5	5	5	5	5	5	5	5	5	5	5	5	5	5	1	1	1	1	1	1	1	3	3	3	3	4	3	5	5		1
3	3	3	3	3	3	3	4	4	3	4	4	2	4	4	3	4	1	3	2	1	1	1	2	3	3	3	4	4	4	4	4		1
3	2	3	3	3	5	5	3	3	3	3	5	5	5	3	3	5	1	1	1	5	1	1	5	3	3	3	3	4	3	3	2		1
3	3	3	4	3	3	3	3	4	3	3	3	4	4	4	3	4	3	3	3	3	3	3	4	3	3	3	4	4	4	3	3		1
3	3	4	4	4	3	3	4	4	4	3	5	5	4	4	4	5	2	2	1	1	2	1	3	4	4	4	4	4	3	3	3		1
2	2	5	5	5	5	5	3	5	5	5	5	5	5	5	5	5	2	1	1	1	1	1	1	5	5	4	3	3	2	3	3		1
3	3	3	3	3	3	3	3	5	5	5	5	5	5	5	5	5	2	1	1	1	1	1	1	4	4	3	3	2	3	3	3		1
2	3	3	3	5	5	5	4	5	3	3	5	5	5	5	5	5	2	3	1	4	3	3	5	3	3	3	3	3	3	4	3		1
3	3	4	3	3	4	3	3	3	3	3	5	2	5	5	3	5	2	4	2	1	3	3	1	4	3	3	3	3	4	4	4		1
3	4	4	4	5	5	5	3	4	3	3	3	3	3	3	3	3	2	5	1	1	1	1	1	1	1	1	1	1	3	3	3		1
1	5	5	5	5	5	5	4	4	4	4	3	3	3	3	3	3	2	1	1	1	1	1	1	4	4	4	4	4	3	3	3		1
5	5	5	5	5	5	5	2	2	2	3	3	2	2	4	2	3	1	2	3	4	3	2	1	2	3	4	4	4	3	3	4		1
3	3	5	5	5	5	5	5	5	5	5	3	4	5	5	3	5	1	4	2	2	2	2	5	5	2	2	3	4	3	2	3		1
3	4	3	3	2	3	2	2	5	3	3	3	3	4	1	1	3	1	5	1	1	1	1	4	2	1	1	1	4	2	2	1		1
3	3	3	4	3	3	4	5	4	4	2	4	3	5	5	3	4	3	3	1	5	1	1	4	4	3	4	3	4	4	3	3		1
4	3	3	4	4	3	5	4	4	3	4	3	3	4	4	2	4	2	1	1	5	1	1	4	4	4	4	3	4	4	3	4		1
5	5	5	5	5	5	5	3	3	3	5	2	3	3	3	1	1	2	1	1	1	1	1	5	5	5	3	3	2	3	3	2		1
3	3	3	4	3	3	5	3	4	3	5	4	3	5	4	3	5	2	4	1	5	5	5	5	5	3	3	3	3	3	3	3		1
3	3	2	5	2	1	3	4	4	4	4	3	4	2	1	1	3	2	1	1	1	1	1	5	3	2	3	3	3	3	3	3		1
4	5	5	5	5	4	5	4	4	5	5	2	3	1	3	1	3	2	4	2	5	3	3	5	3	2	1	4	3	3	3	4		1
3	3	3	2	3	3	3	3	2	3	3	2	2	5	3	3	3	2	1	1	1	1	1	1	3	3	2	3	3	3	5	3		1
3	3	3	3	3	4	3	3	3	3	4	3	3	3	3	3	5	2	3	2	2	2	2	2	3	3	3	3	4	3	3	3		1
4	3	3	3	4	4	4	3	3	4	4	4	4	4	4	3	3	1	3	3	3	3	3	2	3	3	3	4	4	4	3	3		1
2	2	2	5	4	5	4	3	3	3	3	3	3	5	5	3	4	1	3	1	2	3	1	3	3	3	3	3	4	4	4	3		1
5	5	5	5	5	5	5	5	5	5	5	5	5	5	5	4	5	1	5	1	5	1	1	3	5	5	4	4	5	5	3	1		1
1	1	1	1	5	4	4	3	3	2	4	3	4	4	4	2	4	3	4	1	3	2	4	3	3	2	2	2	3	2	2	4		1
1	5	2	5	2	3	5	5	5	5	1	5	5	5	5	5	5	2	5	1	3	4	1	3	5	3	3	4	5	3	5	5		1
4	5	4	3	2	3	4	2	3	4	5	4	3	4	3	4	3	2	2	3	4	5	4	3	2	3	4	5	3	2	3	5		1
3	3	2	3	3	3	5	2	3	3	3	5	5	5	5	5	5	2	1	1	1	1	1	3	3	3	2	3	3	3	3	3		1
3	3	3	3	4	3	3	3	3	4	3	4	2	4	4	3	4	2	3	2	1	2	2	3	3	3	3	3	4	3	3	3		1
3	3	3	4	4	4	3	3	4	4	4	3	3	4	4	4	4	2	4	4	4	3	3	3	3	3	3	4	4	4	3	3		1
3	3	2	3	3	3	5	3	4	4	4	4	3	5	5	3	5	2	5	4	3	1	1	5	4	3	4	3	4	5	3	4		1
3	3	3	3	4	3	5	2	3	3	1	3	1	5	5	1	3	2	5	4	3	3	3	5	2	5	1	3	3	3	3	4		1
3	3	2	3	3	3	5	4	4	3	3	3	5	5	5	3	5	1	2	2	3	2	2	4	3	2	2	3	5	3	4	3		1
3	3	3	3	4	3	3	3	3	2	3	5	5	5	3	3	3	1	1	1	4	1	1	5	3	4	3	3	2	3	3	3		1
3	3	3	4	4	4	3	3	3	3	3	4	4	4	4	5	5	1	4	5	3	3	3	5	5	3	3	3	3	3	4	3		1
3	3	3	3	3	3	3	3	3	3	5	3	3	4	4	3	4	3	4	4	2	3	3	2	3	4	3	3	3	4	4	4		1
3	4	5	5	3	4	3	5	3	3	3	4	3	4	3	2	3	2	4	2	5	4	1	5	2	3	2	3	2	4	3	3		1
3	3	5	5	5	5	3	3	5	3	5	5	1	1	1	3	1	2	1	2	4	1	2	3	2	2	3	4	2	2	3	3		1
3	3	4	4	3	3	3	5	5	3	3	5	5	5	5	5	5	2	4	2	5	1	1	5	5	2	4	3	3	4	4	2		1
3	5	5	5	5	5	3	3	3	3	5	5	4	5	5	5	5	2	4	4	3	4	3	3	5	5	5	5	3	3	2	3		1
3	3	2	3	3	3	4	4	3	3	3	4	4	5	5	5	5	2	3	3	2	1	1	3	5	1	5	5	3	3	3	3		1
3	3	3	3	4	3	4	4	4	4	3	4	3	3	3	3	3	2	2	2	4	2	2	3	3	3	3	3	3	3	3	4		1
3	3	3	4	4	4	3	3	4	4	4	3	3	3	3	4	3	2	2	2	2	2	2	3	3	4	5	5	3	4	3	3		1
2	3	3	3	4	5	4	5	4	3	3	2	4	5	5	3	4	5	1	2	2	2	2	3	5	4	3	4	5	5	4	5		1
3	3	4	3	2	2	5	3	3	3	3	3	3	5	5	4	4	1	3	3	2	3	3	4	3	3	3	2	3	3	3	3		1
3	4	4	4	1	1	5	5	5	3	3	1	4	5	5	5	5	1	3	3	4	5	5	5	5	5	3	1	5	5	4	3		1
3	3	4	4	4	4	4	5	5	5	3	2	5	5	5	4	5	1	3	3	3	3	3	5	2	1	2	3	2	2	3	5		1
2	1	2	3	2	2	5	1	2	3	2	2	5	5	5	5	5	3	2	3	3	3	3	4	1	1	1	1	1	1	5	2		1
1	1	1	1	1	1	3	1	1	1	1	4	5	5	5	5	5	2	3	3	3	3	3	3	2	1	2	3	2	2	5	1		1
3	4	4	4	4	4	4	4	4	3	4	2	3	5	5	3	5	2	3	3	4	3	3	4	1	1	1	1	1	1	4	4		1
2	1	2	3	2	2	5	5	5	5	5	1	3	3	3	4	4	2	3	2	3	3	3	3	2	1	2	3	2	2	5	3		1
1	1	1	1	1	1	5	1	2	3	2	5	5	3	5	5	5	2	3	3	3	3	3	3	1	1	1	1	1	1	4	2		1
1	3	3	3	3	3	3	1	1	1	1	4	5	5	5	5	5	2	5	5	3	3	3	3	1	1	1	1	1	1	4	1		1
2	1	2	3	2	2	4	5	5	5	5	3	3	5	5	1	3	2	3	3	5	3	3	4	2	1	2	3	2	2	4	5		1
1	1	1	1	1	1	2	5	5	5	5	2	4	5	5	5	5	2	3	2	3	4	4	4	1	1	1	1	1	1	4	4		1
2	2	2	2	2	2	3	3	3	4	4	3	3	5	5	1	3	3	2	3	2	2	3	2	2	1	2	3	2	2	3	5		1
2	3	3	3	3	3	3	2	3	2	2	1	5	5	5	5	5	5	3	3	3	3	3	3	1	2	1	2	3	2	2	1		1
2	1	2	3	2	2	5	1	1	1	1	2	4	5	5	5	5	5	2	3	2	2	3	3	2	1	1	1	1	1	1	1		1
1	1	1	1	1	1	5	5	5	5	5	2	3	3	3	3	3	1	3	3	3	3	3	3	1	1	1	1	1	1	5	5		1
2	2	3	5	4	3	3	2	1	2	3	4	3	3	3	3	3	1	3	2	4	3	3	4	5	5	4	5	5	4	4	5		1
1	1	2	3	2	2	5	1	1	1	1	2	3	2	2	2	2	1	3	3	3	3	3	5	2	1	2	3	2	2	2	1		1
1	1	1	1	1	1	4	1	1	1	1	1	2	4	4	3	4	3	2	2	2	2	2	2	1	1	1	1	1	1	1	1		1
1	1	1	3	1	3	2	2	2	3	2	5	3	2	2	1	1	2	3	3	3	3	3	3	2	3	3	4	2	3	1	2		1
3	5	5	5	5	5	5	5	5	5	5	4	2	2	2	5	2	2	3	3	3	4	3	3	2	1	2	3	2	2	4	4		1
1	2	3	2	2	4	4	5	5	4	2	3	2	2	2	2	2	2	4	3	3	3	3	3	1	1	1	1	1	1	4	4		1
1	1	1	1	1	3	3	5	5	5	1	4	4	2	5	1	3	2	4	2	3	4	4	5	3	2	3	3	5	1	5	3		1
5	3	4	5	2	1	4	5	5	3	3	2	2	5	5	2	2	2	2	2	5	4	4	5	2	2	5	5	4	4	4	5		1
2	1	2	3	2	2	5	1	1	2	1	1	2	2	1	1	1	2	5	5	5	5	5	5	1	2	1	3	2	1	3	5		1
1	1	1	1	1	1	3	5	5	4	5	5	5	5	2	3	2	2	4	4	5	2	4	5	2	2	2	3	5	5	5	2		1
1	2	3	2	2	3	4	3	3	3	2	4	3	3	2	3	1	3	4	3	5	3	3	5	2	1	2	3	2	2	3	2		1
2	1	1	1	1	5	5	1	2	3	2	3	2	3	2	3	1	4	4	4	4	4	3	5	1	1	1	1	1	1	3	2		1
1	2	3	2	2	1	5	1	1	1	1	3	4	4	2	5	1	1	4	4	4	4	4	4	2	2	4	1	1	1	1	1		1
1	1	1	1	1	2	2	4	4	4	1	4	2	2	2	1	3	3	4	3	4	3	4	4	1	2	1	2	3	2	2	5		1
5	1	1	1	1	1	1	2	2	5	5	2	2	2	3	2	2	1	4	4	2	2	4	3	1	1	1	1	1	1	1	2		1
5	2	1	2	3	2	2	2	3	2	2	2	2	2	4	2	2	5	4	4	4	4	4	4	1	3	4	4	4	1	2	1		1
2	1	1	1	1	1	1	1	1	1	1	2	2	4	1	2	2	1	5	5	4	5	3	4	1	2	2	2	2	2	1	1		1
5	2	1	2	3	2	2	5	5	5	5	5	2	5	3	1	2	1	2	2	2	2	2	4	2	1	2	2	2	2	2	4		1
1	1	1	1	1	1	1	2	2	1	2	2	2	3	1	2	2	1	2	3	3	2	4	2	1	2	2	2	1	2	2	1		1
1	3	4	3	3	2	2	1	2	3	3	2	2	3	3	3	2	3	4	4	4	4	4	4	1	2	2	2	1	1	1	1		1
2	3	2	2	2	2	2	2	2	1	2	3	2	2	1	3	2	2	5	5	4	5	3	4	1	1	1	3	1	1	1	2		1
2	2	2	4	2	4	2	1	1	1	3	3	3	3	1	2	3	2	4	4	4	4	4	4	1	1	1	1	1	1	1	1		1
2	1	4	1	4	2	1	2	1	1	3	3	4	2	1	2	2	2	5	5	4	5	3	4	2	2	1	1	2	2	1	1		1
2	2	2	2	4	4	2	5	5	5	2	3	1	2	3	1	4	2	4	4	4	4	4	4	2	2	1	2	2	1	3	1		1
2	2	4	4	2	3	2	3	2	2	3	2	3	2	2	2	5	2	3	3	4	3	3	4	1	2	1	1	2	2	1	1		1
3	3	2	2	3	2	1	3	3	3	3	3	1	3	2	3	3	2	4	4	4	4	4	4	1	3	3	1	3	4	3	4		1
1	3	2	1	2	2	2	2	2	1	2	3	2	2	2	2	2	2	5	5	4	5	3	4	3	2	3	2	1	2	2	2		1
1	5	5	2	5	1	2	2	1	2	1	3	1	2	2	2	2	2	3	2	4	3	3	4	1	2	3	2	1	2	2	1		1
3	3	3	1	3	3	2	2	4	2	4	3	1	4	4	3	2	3	4	4	4	4	4	4	3	3	3	2	3	2	2	2		1
4	4	4	4	4	4	2	2	3	3	3	2	1	3	3	2	2	2	5	5	4	5	3	4	1	2	2	2	1	2	1	2		1
4	3	3	3	3	4	2	4	4	3	4	2	3	2	2	2	2	2	4	2	4	3	2	5	3	1	3	1	1	1	1	1		1
1	5	5	5	5	5	5	5	5	5	5	5	5	5	5	3	5	5	3	1	5	3	3	5	5	5	3	3	5	4	5	3		0
4	5	5	5	5	5	5	5	5	5	5	5	5	5	5	5	5	5	3	2	2	2	2	3	5	5	4	4	4	4	5	5		0
4	4	4	4	5	5	5	4	5	4	4	3	3	5	3	2	3	4	2	1	1	1	1	4	4	3	2	3	4	3	4	3		0
4	5	5	5	5	5	5	3	5	5	2	5	4	5	5	5	5	5	2	1	1	1	3	5	3	5	3	3	5	5	4	5		0
3	3	4	5	3	5	5	5	5	3	2	5	5	5	5	2	5	5	5	1	1	1	1	5	3	4	5	4	5	5	4	5		0
5	5	5	5	5	4	5	5	5	5	4	5	4	5	5	4	5	5	1	1	1	1	1	2	5	5	5	4	5	5	5	5		0
5	5	5	5	5	5	5	5	5	5	5	5	5	5	5	5	5	5	3	1	1	3	1	4	5	5	5	4	5	5	5	5		0
5	5	5	5	5	4	5	5	5	5	1	5	3	5	3	4	5	5	2	1	5	1	1	1	5	3	3	4	5	4	3	5		0
5	5	5	5	5	5	5	5	5	5	1	5	5	5	5	5	5	5	1	1	1	1	1	1	5	5	5	5	5	5	5	5		0
3	5	5	5	5	5	5	5	5	5	5	5	5	5	5	5	5	5	1	1	5	1	1	3	5	5	5	5	5	5	5	5		0
5	5	5	5	5	5	5	5	5	5	5	5	5	5	5	5	5	5	1	1	1	1	1	1	5	5	5	5	5	5	5	5		0
2	2	3	3	3	3	5	5	5	5	5	5	4	5	5	5	5	4	2	1	2	2	2	5	4	4	4	4	4	4	4	4		0
4	3	4	4	3	4	5	5	5	4	3	5	4	4	4	4	3	5	1	1	2	1	1	1	4	3	4	4	5	5	5	4		0
4	4	5	5	5	5	5	5	5	5	5	5	5	5	5	5	5	5	1	1	1	1	1	1	5	5	5	5	5	5	5	5		0
5	5	5	5	5	5	5	5	5	5	5	5	5	5	5	4	5	5	1	1	1	1	1	1	5	4	4	3	5	5	5	5		0
3	3	3	3	3	3	3	5	5	4	4	5	5	5	5	5	5	5	5	5	1	3	1	5	5	5	4	3	5	5	5	5		0
3	5	4	3	5	2	5	4	5	4	4	5	5	5	5	3	5	5	4	1	5	2	2	5	5	5	3	4	5	3	5	3		0
3	3	3	3	3	3	3	5	5	5	5	5	5	5	5	3	5	5	3	3	1	1	1	1	5	5	4	5	5	4	5	5		0
3	2	3	3	2	3	3	4	4	4	4	3	3	5	5	4	3	3	3	2	5	2	1	3	4	4	4	4	4	3	3	3		0
3	3	3	4	4	3	4	4	4	4	4	4	4	4	3	3	4	4	2	2	1	1	1	2	4	3	4	4	3	3	4	4		0
5	5	5	5	5	5	5	3	3	3	3	4	3	5	5	5	5	4	3	1	5	1	1	5	5	5	4	5	5	5	5	5		0
1	1	1	1	1	1	1	3	3	3	3	1	1	5	5	3	5	5	3	3	1	3	3	4	3	3	2	4	4	4	4	4		0
3	3	3	3	3	3	3	3	4	3	3	5	4	5	5	4	5	4	3	1	3	2	2	3	4	3	5	4	3	2	3	4		0
4	4	4	4	4	4	3	3	3	3	3	4	2	2	2	2	3	3	3	2	1	1	1	4	4	3	2	2	3	3	3	3		0
4	4	2	4	4	3	4	5	5	5	5	3	3	5	5	5	5	5	5	5	5	5	3	5	5	5	3	3	5	5	4	3		0
5	5	5	5	4	5	5	5	5	5	4	5	4	5	4	3	3	5	1	1	1	1	1	2	4	4	4	5	4	3	5	5		0
5	5	5	5	5	3	5	5	5	5	5	2	5	5	5	5	5	5	1	1	3	1	1	1	5	5	5	5	5	4	5	5		0
3	3	3	3	3	3	3	4	4	4	3	3	3	3	3	3	3	3	2	3	4	2	1	5	4	4	4	4	4	4	2	4		0
3	5	5	5	5	5	5	5	5	5	5	5	4	4	4	3	4	5	1	1	1	1	1	1	4	4	4	5	4	5	5	5		0
3	3	4	4	4	4	4	4	5	5	4	5	4	4	4	4	4	4	2	1	1	1	1	1	5	5	5	4	5	4	4	4		0
5	5	5	5	5	5	5	5	5	5	5	5	5	5	5	4	5	5	2	1	3	1	1	5	5	5	5	5	5	5	3	5		0
5	5	5	5	5	5	5	5	5	5	5	5	5	5	5	5	5	5	4	3	1	2	2	2	5	5	5	5	5	5	5	5		0
3	3	3	3	3	3	3	5	5	5	5	5	4	5	5	5	5	5	1	1	3	1	1	5	5	5	5	5	5	5	5	5		0
4	5	5	5	5	5	5	5	5	5	5	5	5	5	5	3	3	4	1	1	1	1	1	1	5	5	5	5	5	4	5	4		0
3	3	2	3	3	2	3	4	4	4	5	4	4	3	3	3	4	4	3	2	2	2	3	4	3	4	4	4	3	5	5	5		0
3	5	5	5	5	4	5	3	5	3	3	4	3	3	3	3	3	3	3	3	3	3	3	5	5	5	3	3	4	3	3	2		0
4	3	5	3	4	3	4	5	5	5	5	5	5	5	5	4	5	5	1	1	5	1	1	5	5	4	5	4	5	4	4	4		0
1	3	5	5	5	5	5	5	5	5	5	5	5	5	5	5	5	5	4	3	5	3	3	5	3	3	4	4	5	3	5	5		0
4	4	4	4	4	4	4	5	5	5	5	5	3	4	3	3	3	3	1	1	1	1	1	1	5	5	5	4	5	5	3	4		0
2	2	1	3	3	3	3	3	4	1	2	3	5	5	5	5	3	5	5	1	2	1	1	5	4	3	3	2	5	4	3	3		0
3	3	3	3	3	3	3	4	4	3	4	4	4	4	3	3	5	4	1	1	1	1	1	1	4	5	5	4	4	3	4	4		0
3	4	2	3	4	3	4	5	5	5	5	5	2	2	2	4	3	4	4	3	3	2	1	1	4	4	4	5	5	5	4	5		0
3	4	3	4	3	3	3	4	4	4	3	5	5	4	4	3	4	4	3	4	4	3	3	4	5	3	3	3	3	3	3	4		0
3	2	3	2	2	2	2	5	5	5	5	5	5	5	5	3	5	5	1	1	5	2	1	5	5	5	4	5	3	5	5	5		0
5	5	5	5	5	5	5	5	5	5	5	5	4	5	5	5	5	5	1	1	1	1	1	5	5	3	3	3	5	4	5	5		0
4	4	4	4	3	4	4	4	4	3	3	4	3	3	3	3	4	4	1	1	1	1	1	1	3	3	3	3	3	3	4	5		0
3	3	3	3	3	3	3	3	3	3	3	3	3	5	5	3	5	5	4	3	5	2	1	4	3	3	2	2	3	2	3	3		0
3	3	1	3	3	2	4	2	2	2	1	4	4	4	4	4	2	3	3	2	3	3	3	5	4	4	4	4	3	2	4	4		0
5	5	5	5	5	5	5	4	5	5	5	5	4	5	5	4	5	5	1	1	1	1	1	1	4	4	4	4	5	4	5	4		0
3	3	3	4	3	3	3	4	4	4	4	4	4	4	3	4	4	4	3	2	2	3	3	4	4	4	3	3	3	3	3	3		0
3	3	4	4	3	3	3	3	3	3	3	4	3	3	3	3	4	3	3	3	3	3	3	4	3	3	3	3	4	3	3	3		0
5	5	5	5	5	5	5	4	4	5	5	4	5	5	5	2	5	5	4	1	1	1	1	3	2	4	2	3	5	5	5	5		0
2	2	5	4	1	2	4	5	5	5	5	5	5	5	5	4	5	5	1	1	1	1	1	5	5	5	4	2	5	5	5	5		0
4	5	5	5	5	5	5	5	5	5	5	4	3	4	5	5	5	5	1	1	1	1	1	1	5	5	5	5	5	5	5	5		0
3	3	3	3	3	3	3	3	3	4	3	3	3	3	3	3	3	3	4	4	4	3	3	4	3	3	4	2	3	3	3	5		0
4	4	5	5	4	4	4	4	5	5	5	4	4	5	5	2	3	5	4	1	3	1	1	5	5	4	4	4	5	5	4	5		0
3	2	3	4	4	4	4	3	3	3	3	3	2	5	5	2	5	5	5	5	5	5	5	5	3	3	3	3	4	3	3	3		0
5	5	5	5	5	5	5	5	5	4	3	5	5	5	5	5	5	5	1	1	2	1	1	4	4	4	5	4	4	4	4	5		0
3	3	3	3	3	3	3	4	4	4	4	3	3	3	3	3	3	4	3	1	5	3	2	4	4	4	4	4	4	4	4	4		0
4	5	5	5	5	5	5	4	5	5	5	4	5	3	5	3	4	4	3	1	5	3	1	4	5	4	5	3	5	3	5	4		0
4	2	2	2	1	2	2	5	5	5	5	5	5	5	5	4	5	5	1	1	1	1	1	5	5	5	4	5	4	4	3	5		0
1	3	4	3	3	3	5	3	4	4	3	4	3	5	3	4	4	5	3	3	2	2	2	4	4	3	3	2	4	4	3	3		0
5	5	5	5	5	5	5	5	5	5	5	5	5	3	3	3	3	3	1	1	1	1	1	1	5	5	5	5	5	5	5	5		0
5	5	3	5	5	5	5	5	5	5	5	5	4	3	4	3	4	5	1	2	1	1	1	1	2	5	5	5	5	5	5	5		0
4	4	4	4	4	3	4	4	5	4	4	4	5	5	4	5	4	5	4	2	4	2	2	4	5	5	4	3	3	2	3	4		0
5	4	5	5	5	5	5	3	4	4	4	5	5	5	5	3	4	4	3	2	1	3	1	5	5	3	3	3	4	3	5	2		0
4	4	4	4	4	4	4	5	5	5	5	5	4	5	5	4	5	5	1	1	1	1	1	3	5	5	3	3	4	3	2	1		0
1	1	1	1	1	1	1	1	5	5	5	1	5	4	5	5	4	5	3	1	5	3	1	5	4	4	4	3	5	3	5	5		0
1	3	5	5	5	5	5	5	5	5	5	5	5	5	5	5	5	5	4	1	1	1	1	5	5	5	5	3	5	5	5	5		0
2	3	3	3	3	3	3	3	3	4	3	4	4	4	3	3	4	3	5	3	4	4	3	4	5	3	3	2	4	2	2	3		0
3	3	3	3	3	3	3	3	3	3	3	4	3	4	4	4	2	3	1	3	1	3	2	1	3	3	3	4	3	3	3	4		0
3	3	3	3	3	3	3	3	3	3	3	5	3	4	4	2	2	3	3	1	4	1	1	5	3	3	3	4	3	3	3	5		0
5	5	5	5	5	5	5	5	5	5	5	5	3	5	5	5	5	5	1	1	5	1	1	5	5	3	4	3	5	5	5	4		0
3	4	3	4	4	3	3	5	5	5	5	3	4	4	4	2	4	4	3	2	4	3	3	5	4	4	3	3	4	4	3	5		0
3	3	5	3	3	3	5	5	5	3	3	5	5	5	5	5	5	4	5	1	5	1	1	4	4	5	4	4	3	4	5	5		0
1	4	4	4	4	4	5	5	5	4	3	4	5	5	5	3	5	5	4	2	1	4	2	5	5	3	5	5	3	4	4	5		0
4	4	4	5	5	5	5	5	5	5	5	5	5	5	5	5	5	5	1	1	1	1	1	1	5	4	5	4	4	5	4	4		0
3	1	5	1	1	1	5	1	5	1	1	4	4	5	5	5	5	5	4	2	1	1	1	5	3	2	3	3	5	5	2	3		0
4	4	5	5	5	5	5	4	5	5	5	5	4	4	4	4	5	4	1	1	1	1	1	1	5	5	5	5	5	5	5	5		0
3	4	5	5	5	3	4	5	5	5	4	5	5	5	5	5	4	3	1	1	3	1	1	5	5	5	5	4	3	5	5	5		0
4	4	4	5	5	4	5	4	4	4	4	4	3	4	4	3	4	5	2	2	4	2	2	4	4	3	2	3	4	3	3	3		0
3	3	3	4	3	4	3	5	5	5	5	5	3	4	4	4	5	5	1	1	1	1	1	1	5	5	5	5	5	5	5	5		0
5	5	5	5	5	5	5	5	5	5	5	4	4	5	5	3	4	4	3	1	3	2	2	2	4	4	3	3	3	4	3	4		0
3	2	3	2	3	3	2	3	3	3	3	4	2	2	2	2	2	2	3	3	3	2	2	3	2	2	3	4	2	2	3	3		0
4	3	3	5	3	3	3	3	3	3	3	4	3	5	5	3	5	5	5	1	5	1	4	5	5	3	3	4	4	3	3	5		0
2	3	2	4	3	3	3	5	5	5	5	3	3	3	4	5	3	4	2	1	1	2	1	1	5	5	5	5	5	4	3	5		0
3	4	3	4	3	3	3	3	4	4	3	3	3	3	3	2	3	4	3	3	3	3	3	4	3	3	3	3	3	4	4	4		0
5	5	5	5	5	5	5	5	5	5	5	5	5	5	5	5	5	5	4	1	4	1	4	4	5	5	5	5	5	4	5	5		0
5	5	5	5	5	4	5	5	5	5	5	4	4	4	4	4	4	4	3	3	1	1	2	1	4	4	5	3	4	4	3	3		0
5	5	5	5	5	5	5	5	5	5	5	5	5	5	5	5	5	5	1	1	5	1	1	5	5	5	5	5	5	5	5	5		0
4	3	5	4	5	4	5	5	5	5	5	5	5	5	5	4	5	5	1	1	5	5	3	5	5	4	3	3	5	4	5	5		0
2	4	4	5	5	3	5	5	5	5	5	4	3	5	5	3	5	5	3	1	1	1	1	2	5	5	4	5	4	5	4	4		0
3	4	4	2	3	3	3	3	3	4	4	3	2	4	5	4	2	2	3	3	1	1	4	3	2	3	3	3	3	4	4	3		0
4	4	3	4	4	4	4	3	4	4	3	3	3	5	5	3	4	4	5	4	5	5	5	5	3	3	2	2	3	3	3	3		0
3	5	5	5	5	5	5	5	5	5	5	5	5	3	3	3	3	3	1	1	5	1	1	5	3	3	5	3	5	5	5	5		0
4	5	5	5	5	5	5	4	4	3	3	3	3	3	3	2	3	3	3	2	5	2	2	3	3	3	3	3	3	2	2	2		0
3	3	5	5	4	4	4	5	5	5	5	5	5	3	3	4	3	4	1	1	1	1	1	5	4	5	5	3	5	5	5	5		0
3	4	5	3	3	3	4	3	4	5	3	5	4	3	3	4	3	5	5	2	2	1	1	5	5	4	3	3	2	3	4	3		0
3	3	2	3	3	3	4	4	4	4	3	3	3	4	4	3	3	4	5	4	5	4	4	5	2	2	3	2	2	2	2	2		0
5	5	5	5	5	5	5	5	5	5	5	5	5	5	5	5	5	5	1	1	5	1	1	5	5	5	5	5	5	5	5	5		0
5	5	5	5	5	5	5	5	5	5	5	5	5	5	5	2	5	4	2	1	4	1	1	2	5	5	5	4	5	4	5	5		0
3	3	2	4	3	4	2	5	5	5	5	5	5	5	5	3	2	3	1	1	1	1	1	4	5	5	5	4	5	5	5	5		0
3	4	4	5	5	5	5	5	5	5	5	5	5	5	5	4	5	5	1	1	1	1	1	4	5	5	3	3	5	5	5	5		0
3	3	4	4	4	4	4	5	5	4	4	5	5	3	4	3	3	4	2	2	1	3	2	5	5	4	5	5	3	4	3	5		0
3	3	3	3	3	3	3	4	4	4	4	4	3	4	4	3	4	4	4	2	2	2	1	4	4	4	3	4	3	3	4	4		0
3	3	3	4	4	4	4	4	4	3	4	5	4	3	3	3	4	3	5	3	5	3	3	5	5	4	3	3	3	3	2	3		0
3	2	5	4	2	2	2	5	5	5	5	4	4	5	5	4	5	3	4	1	5	1	3	5	3	3	2	2	2	2	3	4		0
3	1	3	3	1	1	1	4	4	4	3	4	4	4	4	4	4	4	1	1	4	4	3	5	5	5	2	2	5	5	2	5		0
3	5	5	5	5	5	5	5	5	5	5	5	5	5	5	5	5	5	1	1	1	1	1	1	5	5	5	5	5	5	5	5		0
4	4	4	4	4	4	4	5	4	4	4	4	5	4	4	4	5	4	1	1	2	1	1	3	4	4	4	4	2	4	4	4		0
4	5	5	4	3	4	5	5	4	5	5	5	2	4	5	5	5	5	3	2	5	1	1	4	4	4	5	3	5	5	5	5		0
1	1	1	3	2	2	2	4	3	3	3	4	3	3	3	4	2	2	4	3	5	3	3	5	3	3	3	5	4	2	2	2		0
3	3	3	3	3	3	3	4	4	4	4	4	4	5	4	2	3	4	2	2	1	2	2	4	4	5	3	2	3	2	4	3		0
3	5	5	5	3	3	4	5	5	5	5	5	4	5	5	4	5	5	2	1	5	1	1	5	5	2	2	3	5	2	5	5		0
4	4	3	4	3	5	4	4	4	4	4	4	4	3	4	3	4	3	5	5	4	5	5	5	4	4	3	2	3	4	5	3		0
5	5	5	5	5	4	4	4	4	4	5	5	5	5	5	4	5	5	1	1	2	1	1	2	5	4	4	4	4	5	5	5		0
3	3	3	3	3	4	5	5	5	5	5	5	5	5	5	5	5	5	3	1	3	1	1	5	5	5	5	3	5	5	5	5		0
3	4	3	4	4	3	5	3	4	4	3	4	4	4	4	4	4	4	3	3	3	4	4	5	3	3	3	3	4	4	4	4		0
3	3	4	3	3	3	4	4	3	3	3	5	3	5	4	2	5	5	4	3	5	3	3	5	4	3	2	2	3	2	3	2		0
1	3	3	3	3	5	5	5	5	5	5	5	5	5	5	5	5	5	5	3	5	3	2	5	5	5	3	3	5	5	5	4		0
4	4	4	4	5	5	5	4	5	4	4	5	5	5	5	5	5	5	1	1	1	1	1	1	5	5	5	5	5	5	5	5		0
4	4	4	4	4	4	4	4	4	4	4	4	4	4	4	4	4	4	2	2	2	2	2	2	4	4	4	4	4	4	4	4		0
3	3	3	3	3	3	4	4	4	4	5	4	4	5	5	5	5	5	2	1	3	1	1	2	5	4	4	4	5	4	3	5		0
5	5	5	5	4	4	4	5	5	5	4	5	5	5	5	3	5	4	2	3	5	4	2	5	5	5	4	4	5	3	4	4		0
2	3	3	5	5	5	5	4	5	4	4	4	5	4	5	4	4	5	1	1	1	1	3	2	3	3	2	2	2	2	4	5		0
3	4	5	5	4	4	5	5	5	5	4	4	2	4	4	4	4	4	3	1	5	1	1	4	4	5	5	5	5	4	5	5		0
3	3	3	3	2	2	3	5	5	5	5	5	1	5	5	5	5	5	2	1	1	1	1	3	5	4	5	3	5	5	5	3		0
4	5	5	5	5	5	5	5	5	5	5	5	5	5	5	5	5	5	1	1	1	1	1	1	5	5	5	5	5	5	5	5		0
5	3	3	5	5	5	3	1	1	1	1	3	1	5	5	1	3	5	2	1	1	1	1	5	4	5	4	2	5	3	3	1		0
4	4	3	4	3	4	4	4	4	4	4	4	4	4	4	5	4	4	2	2	2	2	2	2	4	4	4	4	4	4	4	4		0
3	3	4	3	3	3	3	5	5	5	5	4	5	5	5	5	5	5	5	5	5	1	1	5	3	5	5	5	5	5	5	5		0
3	3	3	3	3	3	3	5	5	5	5	5	5	5	5	3	5	5	2	1	5	3	2	5	5	4	3	3	5	5	4	5		0
3	4	3	4	3	4	3	3	4	3	4	3	4	3	4	3	4	3	3	4	3	4	3	4	3	3	3	3	3	3	3	3		0
1	1	5	5	5	5	5	5	5	5	5	5	5	5	5	5	5	5	1	1	1	1	1	1	5	5	5	5	5	5	5	5		0
3	5	5	5	5	5	5	5	5	5	5	5	3	4	5	3	5	5	5	5	5	5	5	5	5	2	2	1	3	4	5	4		0
5	5	5	5	5	5	5	5	5	5	5	5	4	4	4	3	4	4	1	1	2	1	1	1	5	5	5	5	5	3	5	5		0
3	3	4	4	4	4	4	5	5	5	5	5	5	5	5	4	5	5	3	1	1	1	1	5	5	3	3	4	5	5	4	5		0
3	4	4	4	4	4	4	5	5	5	5	5	5	5	5	4	5	4	2	1	5	3	3	5	5	5	4	5	5	5	5	5		0
5	5	5	5	5	5	5	5	5	5	5	5	5	5	5	5	5	5	1	1	1	1	1	1	4	4	5	5	5	3	3	4		0
5	5	5	5	5	5	5	5	5	5	5	5	5	5	5	5	5	5	1	1	1	1	1	1	5	5	5	5	5	5	5	5		0
4	4	4	4	4	4	4	5	5	5	5	4	4	3	3	3	4	5	2	2	2	2	2	1	5	5	5	4	4	5	5	4		0
1	1	1	1	1	1	3	2	2	2	3	2	1	2	3	1	2	2	5	2	4	4	4	5	3	2	1	1	2	2	2	2		0
3	3	4	5	3	3	3	5	5	5	2	1	1	5	5	1	5	4	5	1	5	3	1	5	5	1	1	2	1	4	3	2		0
4	3	2	4	3	3	5	2	3	2	3	3	3	4	3	1	3	4	1	1	4	2	2	5	3	2	1	2	3	2	1	2		0
3	3	4	4	4	3	3	2	2	3	3	3	3	3	3	3	3	3	3	3	5	3	3	4	5	4	4	3	5	3	3	3		0
5	5	5	5	5	5	5	5	5	5	5	5	5	5	5	5	5	5	1	1	1	1	1	2	4	5	4	5	5	4	5	5		0
5	5	1	5	5	5	5	5	5	5	5	5	5	5	5	1	5	3	5	5	5	1	4	5	5	5	3	1	5	3	1	4		0
3	3	3	3	4	4	4	4	4	4	5	5	4	4	4	3	3	3	2	1	3	1	2	5	5	5	3	3	2	3	3	5		0
3	5	5	5	5	5	5	5	5	5	5	5	5	5	5	5	5	5	1	1	1	1	1	1	5	5	5	5	5	5	5	5		0
2	1	1	2	3	2	1	5	5	5	5	5	5	5	5	5	5	5	5	1	5	1	1	5	5	5	5	3	5	5	5	5		0
4	4	5	4	4	4	5	3	3	4	3	3	2	3	3	3	3	4	3	1	5	3	3	5	3	3	3	2	3	2	2	3		0
4	5	5	5	5	5	5	4	4	4	3	4	3	3	3	2	3	3	2	1	1	2	1	4	4	4	3	3	5	4	3	5		0
2	2	3	5	4	1	1	3	3	1	4	3	1	1	1	1	1	1	5	3	4	3	5	5	5	4	1	1	4	5	3	5		0
2	2	2	2	2	2	2	5	5	5	5	5	5	5	5	5	5	5	1	1	5	1	1	5	4	5	5	3	5	5	5	5		0
5	5	5	5	5	5	4	3	3	3	3	4	4	5	3	2	3	3	1	1	2	1	1	2	4	3	4	3	3	2	3	4		0
4	3	5	5	4	3	3	1	3	3	4	3	3	4	5	4	4	5	3	1	2	1	1	3	3	3	4	4	5	4	3	4		0
3	4	4	4	4	4	4	5	5	4	4	4	4	5	5	3	4	4	1	1	5	3	3	5	4	4	3	4	4	1	3	1		0
3	4	4	4	3	4	5	5	5	5	3	3	2	5	3	1	2	2	5	3	5	4	3	5	5	3	2	3	5	3	3	3		0
3	3	3	5	4	4	5	3	3	3	3	5	3	4	4	3	3	3	4	3	5	3	1	5	4	3	2	3	3	3	3	3		0
4	3	3	4	4	4	3	3	3	3	3	3	2	3	2	2	2	2	5	5	5	4	4	5	3	2	1	3	3	2	1	3		0
1	5	3	2	1	1	3	4	4	4	3	3	1	2	1	1	4	3	5	5	5	3	5	4	5	3	1	1	4	1	2	1		0
2	3	4	4	3	4	4	5	5	5	5	4	3	5	5	2	4	4	2	1	4	2	1	4	5	3	3	3	4	5	4	5		0
4	3	3	3	3	3	3	5	5	5	3	5	4	5	4	5	3	4	1	1	2	1	1	1	4	4	3	4	4	2	4	5		0
3	3	3	3	3	3	3	4	4	4	4	2	1	4	4	1	4	4	1	1	3	1	1	1	4	1	4	4	4	4	4	4		0
5	5	5	5	5	5	5	5	5	5	5	5	5	5	5	5	5	5	1	1	1	1	1	1	5	5	5	5	5	5	5	5		0
3	3	5	4	3	4	4	5	5	5	4	5	3	5	5	3	4	5	1	1	1	1	1	1	5	5	5	5	5	5	4	4		0
2	2	4	3	2	3	2	3	4	3	2	4	4	5	4	4	5	5	5	4	5	5	5	5	3	2	2	1	4	3	2	2		0
3	3	1	2	4	3	3	5	5	5	5	5	2	5	5	5	5	5	5	1	3	5	1	5	5	1	3	1	2	2	5	3		0
3	3	3	4	4	4	3	4	3	4	2	3	4	2	4	4	4	4	4	4	3	4	3	4	4	4	4	3	3	4	3	4		0
3	5	5	5	5	5	5	4	5	5	5	5	5	2	2	4	5	5	4	2	4	2	2	5	5	5	3	3	3	5	5	4		0
2	2	3	4	2	3	3	4	4	4	5	3	1	2	2	1	3	2	5	1	5	3	3	5	3	4	3	4	5	2	2	4		0
1	5	5	5	5	4	5	3	3	3	3	4	3	3	3	3	3	3	2	1	1	2	1	1	5	4	4	4	5	3	3	5		0
1	1	3	1	3	3	1	5	5	5	5	5	5	5	5	4	3	5	1	1	1	1	1	5	5	5	1	1	5	3	5	5		0
4	4	4	4	4	4	4	4	4	4	4	5	4	4	4	4	4	4	3	3	4	3	4	4	5	4	2	3	4	4	3	4		0
3	3	5	5	5	5	3	5	5	5	5	3	5	5	5	1	5	3	5	1	1	1	1	4	5	3	1	3	3	4	4	4		0
4	4	3	5	4	4	5	5	5	5	5	5	5	5	5	4	5	5	4	2	1	2	2	5	5	5	4	4	5	4	5	5		0
4	5	5	5	5	5	5	4	5	3	4	4	5	5	5	4	4	5	1	1	5	1	3	5	3	3	3	3	4	4	3	3		0
3	3	4	5	5	5	5	5	5	5	5	5	3	5	5	3	5	5	3	1	3	2	1	3	5	5	5	4	4	3	4	5		0
4	3	4	4	4	5	5	2	3	3	3	3	3	2	2	3	4	4	2	1	1	1	2	4	3	3	4	5	3	3	2	5		0
4	3	4	3	4	3	4	4	4	4	4	4	4	4	3	1	2	3	3	3	5	3	4	4	4	4	2	3	4	3	4	3		0
4	4	4	4	4	4	4	5	5	5	5	5	5	5	5	5	5	5	5	1	1	1	1	5	5	5	5	5	5	5	5	5		0
3	3	3	3	3	3	5	5	5	5	5	5	5	5	5	3	3	4	3	1	1	3	2	5	5	5	4	3	5	3	3	5		0
1	1	1	1	1	1	1	1	1	1	1	1	2	1	1	1	1	1	5	3	5	3	5	5	2	3	4	2	1	3	5	4		0
5	5	5	5	5	5	5	5	5	5	5	5	5	4	4	3	5	5	4	1	3	1	1	4	5	5	4	4	5	4	5	5		0
5	5	5	5	5	5	5	5	5	5	5	5	5	5	5	5	5	5	3	3	4	4	2	4	5	5	5	5	5	5	5	4		0
3	3	3	3	3	3	4	3	4	4	4	4	4	4	4	3	4	4	3	3	4	4	4	4	3	3	3	2	2	2	3	4		0
4	4	4	4	4	3	4	4	4	3	3	2	4	5	5	4	5	5	2	1	1	1	1	1	4	4	4	5	4	3	3	4		0
4	5	5	5	5	5	5	5	5	5	5	5	3	5	5	4	5	5	3	1	5	3	3	5	5	5	4	3	5	5	4	5		0
1	1	4	2	3	3	2	5	5	5	5	5	4	5	5	5	5	5	1	1	5	1	1	5	5	5	5	4	5	4	5	5		0
3	3	2	3	4	4	4	2	3	3	3	1	5	5	5	5	5	5	1	1	5	5	5	5	2	5	5	1	3	4	2	4		0
3	4	3	3	3	3	4	3	4	4	4	3	1	2	3	3	3	3	5	3	5	3	3	5	3	3	2	3	4	4	5	3		0
3	4	4	5	5	5	3	5	5	5	5	5	5	5	5	5	5	5	1	1	1	1	1	5	5	5	5	5	5	5	5	4		0
4	4	4	4	5	5	5	3	5	5	5	5	5	5	5	5	5	5	1	1	4	1	1	1	4	4	4	4	4	3	5	5		0
3	5	5	5	5	5	5	5	5	5	5	5	5	5	5	5	5	5	1	1	4	1	1	3	2	1	2	1	1	1	3	5		0
3	3	5	3	3	3	5	5	5	5	5	5	5	5	5	5	5	5	4	1	5	1	1	3	5	5	5	5	5	5	5	5		0
1	3	1	2	1	3	1	3	3	3	3	4	4	4	4	4	4	4	4	4	4	4	4	5	3	3	3	3	3	3	3	3		0
4	5	5	5	3	3	5	5	5	5	5	5	5	5	5	5	5	5	1	1	1	1	1	1	5	5	5	5	5	5	5	5		0
2	2	2	3	4	4	5	5	5	5	5	5	5	5	5	5	5	5	3	2	4	2	2	5	5	5	1	3	5	1	2	3		0
4	5	2	4	4	3	5	4	5	4	3	5	5	4	4	4	5	5	4	5	1	4	3	5	4	3	3	2	4	3	4	2		0
3	2	3	2	3	3	3	2	3	3	3	3	3	3	3	2	4	4	4	2	5	2	2	5	2	3	1	2	2	2	1	3		0
1	3	3	3	5	1	5	1	1	1	1	3	3	5	5	1	5	5	1	1	1	1	1	1	2	1	5	3	3	5	4	5		0
1	3	3	3	3	3	3	3	4	5	5	5	4	3	3	3	2	3	4	3	3	3	4	5	3	5	3	4	3	1	5	5		0
3	3	4	5	4	3	4	5	5	5	3	3	4	4	4	2	3	3	4	2	5	5	5	5	4	3	2	3	4	3	3	4		0
3	3	3	3	3	3	3	3	3	3	2	3	3	3	3	2	3	3	3	3	3	2	3	4	3	2	3	3	3	3	2	3		0
3	4	4	4	3	3	3	3	2	3	2	1	3	4	4	2	2	4	5	5	4	5	5	4	3	2	1	2	3	2	1	1		0
4	5	5	5	5	5	5	5	5	5	5	5	3	4	4	1	4	5	2	2	5	2	2	2	5	1	3	4	4	4	5	5		0
4	3	5	4	5	5	5	4	4	5	5	5	4	3	3	3	4	4	3	1	5	5	4	5	5	3	3	2	4	3	3	3		0
3	4	3	4	2	4	3	3	2	3	3	2	2	5	5	1	5	4	5	5	5	5	5	5	4	3	2	4	1	5	1	4		0
4	4	4	4	4	4	4	5	5	5	5	3	4	4	4	4	4	4	2	1	2	2	1	3	4	4	3	3	4	4	4	4		0
4	4	4	4	4	4	4	5	4	3	2	5	4	3	2	3	5	4	3	3	2	3	4	5	5	4	3	2	4	5	4	4		0
4	4	4	4	4	4	4	5	5	5	5	5	5	5	5	5	5	5	1	1	1	1	1	1	5	5	5	5	5	5	5	5		0
4	4	5	5	5	5	5	4	5	5	4	5	5	5	5	3	4	4	1	1	3	1	1	4	5	4	3	4	5	4	5	4		0
5	5	5	5	5	5	5	4	4	4	3	5	4	3	3	2	3	3	3	3	5	3	3	5	5	3	4	3	4	3	3	4		0
3	3	3	3	3	3	3	4	4	4	4	3	3	3	3	3	3	3	2	2	2	2	2	2	3	3	3	3	3	3	3	3		0
3	3	3	3	3	3	3	1	1	1	1	1	1	1	1	1	1	1	5	5	5	5	5	5	1	1	1	1	1	1	1	1		0
5	5	5	5	5	5	5	5	5	5	5	5	5	5	5	5	5	5	1	1	1	1	1	1	5	5	5	5	5	5	5	5		0
3	5	4	5	4	3	4	2	3	2	2	4	4	4	4	4	4	4	3	3	3	3	4	5	5	5	3	2	3	3	3	3		0
3	3	3	3	4	4	4	4	3	3	4	4	4	5	5	2	4	4	3	2	2	1	1	2	5	2	2	3	4	4	4	3		0
3	3	5	2	3	2	3	4	5	2	4	2	4	5	5	3	4	4	4	1	4	4	1	5	3	3	3	2	3	2	1	2		0
4	3	3	3	3	3	3	3	3	3	3	3	3	3	3	3	3	3	1	1	1	1	1	5	3	3	3	3	3	3	3	3		0
1	4	5	5	5	5	5	5	5	5	5	5	5	5	5	3	5	5	1	1	1	1	1	3	4	3	3	3	4	5	5	3		0
3	3	2	3	3	4	3	3	3	3	3	4	4	3	4	3	4	3	4	4	5	5	5	5	2	2	2	2	2	3	3	3		0
2	3	3	3	3	3	3	3	3	3	3	3	3	3	3	3	3	3	2	2	2	2	2	2	3	3	3	3	3	2	3	3		0
1	1	1	5	5	1	3	3	2	2	2	2	1	1	1	1	1	1	3	1	5	1	1	5	3	2	1	1	2	4	1	1		0
4	5	5	5	5	5	5	5	5	5	5	5	5	5	5	5	5	5	3	1	1	1	1	1	5	5	5	5	5	5	5	5		0
4	4	4	4	4	3	4	5	5	5	5	4	4	5	4	4	4	4	2	1	1	3	2	5	4	3	3	2	5	5	5	3		0
5	5	5	5	3	3	3	3	5	5	3	5	1	5	5	5	5	5	1	1	1	5	1	5	5	5	5	5	5	5	5	5		0
2	3	4	3	3	2	4	4	4	3	2	3	2	3	2	1	2	2	2	1	3	3	2	4	2	2	2	1	2	1	2	2		0
1	5	5	5	5	5	5	5	5	5	5	5	1	5	5	5	5	5	1	1	1	1	1	1	5	5	5	5	5	5	5	5		0
1	1	1	5	1	1	1	5	5	5	5	5	5	5	5	5	5	5	1	1	1	1	1	5	5	5	5	5	5	5	5	5		0
1	2	3	3	2	1	1	3	4	4	3	4	4	4	3	3	3	3	1	2	4	2	1	4	4	3	2	3	4	2	3	4		0
5	5	5	5	5	5	5	5	5	5	5	5	5	4	4	1	4	4	5	2	5	5	5	5	2	2	2	2	2	2	2	5		0
3	3	3	3	3	3	3	1	3	3	3	5	5	5	5	5	5	5	3	1	5	5	5	5	3	3	1	1	3	3	3	1		0
2	2	1	5	5	3	3	5	5	5	5	5	5	5	5	5	5	5	1	1	1	1	1	5	5	5	3	3	5	5	5	5		0
4	4	4	4	4	1	4	4	4	4	4	4	1	1	1	1	1	3	2	1	5	1	1	5	3	4	3	3	4	4	4	4		0
5	5	5	5	5	5	5	5	5	5	5	5	5	5	5	5	5	5	1	1	1	1	1	3	5	5	5	5	5	5	5	5		0
2	3	3	3	2	4	4	3	2	2	3	3	3	3	3	3	2	2	5	4	3	4	5	5	2	2	1	1	3	3	3	2		0
3	3	3	3	3	3	3	4	4	4	3	4	4	4	3	3	3	4	4	4	4	4	4	4	4	4	3	3	3	3	3	4		0
5	5	5	5	5	5	5	5	5	5	5	5	5	5	5	5	5	5	5	1	1	5	1	5	5	5	1	1	5	5	5	5		0
5	5	5	5	5	4	5	5	5	5	5	5	5	5	5	3	5	5	4	2	5	3	1	5	4	3	2	3	4	4	4	4		0
5	5	5	5	5	5	5	5	5	5	5	5	1	1	1	1	1	1	1	1	1	1	1	1	5	5	5	5	5	5	5	5		0
3	4	4	4	4	4	4	4	4	4	4	5	5	5	5	5	5	5	4	4	4	2	2	4	4	4	4	4	4	3	3	3		0
4	5	5	4	4	4	5	4	4	4	4	4	3	4	3	3	5	4	4	4	5	3	4	5	3	4	4	2	3	4	4	3		0
3	3	5	3	2	3	3	2	2	2	3	2	4	3	2	1	2	3	5	4	4	1	1	5	4	4	1	1	3	3	3	3		0
3	3	4	4	3	3	3	4	4	4	3	4	3	4	4	3	4	4	4	2	3	3	3	4	4	3	3	2	4	2	4	3		0
4	5	4	5	5	4	4	5	4	5	5	4	3	3	4	5	4	5	1	1	2	1	1	2	5	4	5	5	5	4	5	5		0
3	3	3	4	4	4	4	5	3	4	3	5	5	5	4	3	5	3	4	3	4	3	4	3	3	4	3	4	5	4	5	5		0
4	5	4	4	4	4	4	5	5	5	5	5	5	5	5	3	5	3	1	1	1	1	1	1	5	4	5	5	5	5	4	5		0
5	5	5	5	5	5	5	5	5	5	5	5	5	5	4	3	4	5	2	1	1	1	1	4	4	4	4	4	5	5	5	5		0
1	3	2	5	5	4	5	4	4	5	5	3	3	3	3	2	3	4	3	1	2	1	1	3	2	2	2	2	3	2	1	1		0
3	4	4	5	5	5	5	3	3	3	3	3	3	3	3	2	3	2	3	1	5	3	2	5	4	4	3	3	4	5	4	4		0
3	4	4	5	4	3	3	5	5	5	5	5	5	5	5	3	5	5	5	3	3	3	3	3	4	4	3	3	4	3	3	3		0
5	5	5	5	5	5	5	1	1	1	1	3	3	3	3	3	3	3	1	1	1	1	1	1	3	3	3	5	3	3	3	1		0
3	3	3	3	3	3	3	4	4	4	4	3	3	5	4	4	4	5	3	4	5	5	4	5	4	3	3	2	4	4	4	2		0
3	4	4	4	4	4	4	4	3	4	3	3	3	3	3	3	3	3	3	3	3	3	3	3	3	3	3	3	3	3	3	3		0
2	3	2	3	2	2	3	3	3	3	2	2	2	3	3	3	3	3	4	3	4	2	2	3	3	2	2	2	3	3	3	3		0
3	3	3	3	3	3	3	3	3	4	4	3	3	4	4	3	3	3	3	3	4	4	4	4	3	3	2	4	3	3	3	3		0
2	4	3	4	4	4	4	3	3	3	3	3	3	3	3	3	3	3	1	2	2	2	2	2	3	3	3	3	3	3	3	4		0
5	5	5	5	5	5	5	5	5	5	5	5	5	5	5	5	5	5	1	1	1	1	1	1	3	2	2	3	5	5	3	4		0
4	3	4	5	5	5	4	5	3	3	3	4	4	4	4	4	4	4	1	1	4	1	1	3	5	5	4	4	5	1	5	3		0
1	5	5	5	5	5	5	5	5	5	5	5	5	5	5	5	5	5	1	1	1	1	1	5	4	4	5	4	5	5	5	5		0
3	3	5	5	5	5	5	5	5	5	5	4	5	5	5	3	3	4	1	1	1	1	1	5	3	4	3	3	4	4	4	5		0
1	1	3	2	1	1	1	3	3	2	2	2	3	1	1	1	3	2	2	5	3	1	1	3	1	1	3	2	2	2	3	1		0
5	5	5	5	5	5	5	5	5	5	5	5	5	5	5	5	5	5	1	1	1	1	1	1	5	5	5	5	5	5	5	5		0
1	3	3	3	3	3	3	5	5	4	3	5	4	3	3	5	4	3	5	5	4	2	5	4	5	4	3	4	3	5	5	2		0
2	3	3	4	4	3	5	3	3	3	3	3	3	4	3	2	4	5	3	2	5	3	2	4	3	3	2	4	4	2	3	4		0
3	3	3	3	3	3	3	3	3	3	3	3	3	3	4	3	3	3	1	3	4	2	3	5	5	3	3	3	3	4	4	4		0
4	4	2	4	4	4	3	4	3	4	5	2	4	4	2	1	3	2	4	3	5	3	2	5	3	4	2	2	3	4	3	2		0
3	4	4	5	5	5	5	5	5	5	5	5	5	5	5	5	5	5	1	1	1	1	1	1	5	5	4	5	3	4	5	5		0
1	1	3	1	1	1	5	5	5	5	5	1	1	5	5	5	5	5	2	1	1	1	1	5	1	1	5	1	5	5	5	5		0
5	5	5	4	4	5	5	5	5	5	4	3	5	5	3	4	4	5	1	1	1	1	1	1	5	3	5	4	5	5	3	5		0
5	5	5	5	5	5	5	5	5	5	5	5	5	5	5	5	5	5	4	5	4	4	4	5	5	5	4	3	4	4	5	4		0
3	3	3	3	3	3	3	5	5	5	5	5	3	5	4	3	5	5	1	1	1	1	1	5	3	4	4	5	4	1	1	5		0
2	3	2	3	3	3	2	2	2	2	2	2	2	3	3	2	2	3	4	3	4	3	4	4	2	2	1	2	2	1	2	1		0
5	4	4	3	3	5	1	5	3	4	4	5	4	4	3	3	2	4	5	4	3	5	4	4	5	4	4	4	2	5	5	5		0
3	3	3	3	4	4	4	5	5	5	5	4	4	3	3	3	3	3	1	1	5	1	1	3	5	4	5	5	5	3	5	5		0
3	4	4	4	4	4	4	5	5	5	3	4	3	3	3	1	3	3	4	2	5	2	2	5	3	3	1	2	3	3	3	2		0
5	5	5	5	5	5	5	5	5	5	5	5	5	5	5	5	4	4	1	1	5	1	1	5	4	5	5	5	5	5	5	5		0
5	5	5	5	5	5	5	5	5	5	5	5	5	5	5	5	5	5	1	1	1	1	1	1	5	5	5	5	5	5	5	5		0
5	5	5	5	5	5	5	5	5	5	5	5	5	5	5	3	5	5	1	1	1	1	1	1	5	5	5	5	5	1	5	5		0
5	5	5	5	5	5	5	5	5	5	5	3	3	5	5	5	5	5	1	1	1	1	1	1	5	5	5	1	5	5	5	5		0
1	1	1	1	3	3	3	5	5	4	5	3	5	5	5	1	5	5	4	5	5	4	5	5	5	1	1	1	5	1	1	4		0
5	5	5	5	5	5	5	5	5	5	5	5	5	5	5	5	5	5	1	1	1	1	1	1	5	5	5	5	5	5	5	5		0
4	5	5	5	5	5	5	4	3	4	3	5	5	5	5	4	5	5	5	2	5	5	5	5	4	5	3	3	5	2	2	5		0
3	3	2	3	3	3	3	3	3	3	3	2	2	4	4	3	4	4	3	1	3	1	1	2	4	2	2	2	2	2	3	3		0
1	1	1	1	2	2	2	1	1	1	3	1	1	1	1	1	1	1	1	1	1	1	1	1	3	3	3	1	1	1	3	1		0
4	4	5	5	5	5	5	5	5	5	5	5	3	2	2	4	2	4	1	1	5	1	1	2	5	5	5	5	5	5	5	5		0
3	3	4	5	1	5	1	3	3	4	4	1	4	4	4	1	4	4	1	1	1	1	1	1	5	5	5	5	5	5	5	5		0
1	5	5	5	5	4	5	5	5	5	5	5	5	2	2	3	3	2	3	1	5	5	5	5	5	5	3	3	5	5	5	2		0
3	3	3	3	3	3	3	4	4	4	4	4	4	4	4	4	4	4	4	4	4	4	4	4	4	4	2	3	4	4	4	4		0
3	3	4	3	3	3	4	4	4	4	4	4	4	4	3	3	4	4	3	3	4	4	3	3	4	2	4	3	5	3	3	3		0
4	3	4	5	5	5	5	5	5	5	5	5	5	5	5	5	5	5	5	4	5	5	5	5	5	5	4	4	5	5	4	4		0
5	5	5	5	5	5	5	5	5	5	5	5	5	5	5	3	3	3	1	1	5	1	1	5	5	3	4	3	5	3	5	5		0
2	2	2	3	2	2	2	2	2	3	2	3	2	3	3	2	2	3	3	3	3	3	2	3	3	2	3	3	2	3	2	3		0
4	4	5	5	5	5	4	5	5	5	5	5	5	5	5	5	5	5	1	1	1	1	1	1	5	1	4	4	5	5	5	5		0
3	3	2	3	3	3	3	4	4	4	3	4	4	4	4	3	4	4	3	1	5	1	1	5	4	4	1	3	4	4	3	5		0
3	3	3	2	3	2	3	5	5	5	5	3	3	3	3	3	3	3	2	1	5	1	1	5	5	5	5	5	5	3	4	5		0
3	3	4	4	4	3	5	5	5	5	5	4	5	2	3	3	4	4	3	1	2	1	1	5	4	3	3	3	4	3	5	4		0
3	3	5	4	4	3	5	5	5	5	5	5	5	5	5	5	5	5	1	1	1	1	1	2	5	4	5	4	5	4	5	4		0
5	5	5	5	5	5	5	5	5	5	5	4	4	5	5	5	5	5	1	1	1	1	1	1	5	5	4	5	5	4	5	5		0
4	4	4	4	4	4	4	3	3	4	3	3	3	3	3	3	3	3	4	3	3	3	3	4	3	3	1	3	3	3	3	3		0
1	1	1	1	5	1	1	3	3	3	3	3	1	4	1	1	3	1	1	5	5	5	5	5	3	3	3	3	3	3	3	3		0
2	2	2	2	2	2	3	2	2	2	3	1	2	5	5	1	5	5	3	3	5	3	4	5	3	2	1	1	2	3	3	3		0
3	3	5	5	5	4	5	4	4	4	4	5	5	5	5	5	5	5	5	1	5	5	1	5	3	3	2	2	3	3	3	3		0
5	5	5	5	5	5	5	4	5	5	5	5	4	1	4	4	5	5	1	1	1	1	1	1	5	5	4	5	5	5	5	5		0
5	5	5	4	5	5	5	5	5	4	5	5	3	3	2	3	3	3	2	2	3	4	4	4	5	5	4	5	5	5	5	5		0
3	3	3	5	3	3	5	5	5	5	5	5	5	5	5	3	5	5	1	1	3	1	1	1	5	5	5	5	5	5	5	5		0
5	5	5	5	5	5	5	5	5	5	5	5	5	5	5	5	5	5	1	1	1	1	1	5	5	5	5	5	1	1	1	1		0
1	1	1	1	1	1	1	5	5	5	5	5	5	5	5	5	5	5	5	5	5	5	5	5	5	5	5	5	5	5	5	5		0
4	5	5	5	5	4	5	5	5	5	5	5	4	5	5	3	5	5	3	1	4	1	1	5	5	5	4	4	5	5	5	5		0
5	5	5	5	5	5	5	5	5	5	5	5	5	5	5	5	5	5	4	1	4	1	1	5	5	5	3	3	5	5	5	3		0
3	3	5	3	4	3	5	3	3	3	3	3	3	3	3	3	3	3	5	5	5	3	5	5	3	2	2	2	2	3	3	2		0
3	4	3	3	5	3	3	5	5	5	5	1	4	3	1	1	1	2	5	5	5	5	3	5	3	4	3	2	3	5	5	3		0
2	3	2	5	5	4	5	3	4	4	5	5	5	5	5	5	5	5	5	5	5	5	5	5	5	5	4	5	5	5	5	5		0
3	3	1	4	4	4	3	5	5	5	3	2	3	5	1	1	3	1	5	5	5	5	5	5	3	1	1	1	5	5	5	4		0
3	4	4	3	3	2	2	3	3	4	3	3	3	4	4	4	5	3	3	3	3	3	5	3	1	1	3	3	3	3	5	2		0
3	3	3	4	4	4	4	4	4	3	4	4	4	4	4	3	4	4	4	2	5	4	4	5	4	3	2	2	4	4	3	3		0
3	3	4	4	5	3	5	4	4	5	5	5	4	3	3	3	5	5	5	5	5	3	3	5	5	5	5	3	5	3	4	5		0
5	5	5	5	5	5	5	4	5	5	5	5	5	5	5	5	5	5	4	1	1	1	1	3	5	4	3	3	3	3	3	3		0
5	5	5	5	5	4	4	3	3	3	3	3	3	5	5	5	5	5	5	3	3	5	3	4	5	5	3	3	3	3	3	3		0
1	2	1	2	2	2	2	3	3	2	3	3	3	5	5	1	4	5	5	3	5	4	5	5	2	2	1	1	3	3	3	3		0
2	2	2	2	2	2	2	4	4	3	4	3	4	4	3	4	3	4	3	4	4	4	3	3	3	3	3	3	3	3	3	4		0
3	4	4	4	4	3	4	5	5	5	4	3	4	1	1	1	1	4	3	1	3	1	1	5	5	3	4	3	5	4	3	4		0
3	4	5	5	5	3	5	5	5	5	5	5	5	5	5	3	5	5	4	1	1	1	1	3	5	5	5	3	5	4	5	3		0
5	5	5	5	5	5	5	5	5	5	5	5	5	5	5	5	5	5	1	1	5	1	1	1	5	5	5	5	5	5	5	5		0
3	4	5	5	5	4	5	3	3	3	3	3	3	5	4	1	1	1	5	2	5	2	4	5	5	5	1	3	5	3	2	3		0
3	5	5	5	5	5	5	5	5	5	5	5	5	5	5	5	5	5	3	1	1	1	1	1	5	5	3	5	5	1	5	5		0
4	4	4	5	4	4	4	5	5	4	4	5	3	5	5	3	4	5	1	1	5	3	1	5	5	3	3	3	4	4	4	4		0
3	3	3	3	3	3	3	4	5	4	4	5	4	5	3	3	5	5	2	1	1	2	2	4	4	3	2	2	4	5	3	3		0
2	5	5	5	5	5	5	5	5	5	1	5	5	5	5	5	5	5	1	1	1	1	1	5	5	5	3	5	5	5	5	5		0
3	3	4	4	3	4	4	3	4	4	3	5	4	4	3	3	4	4	2	1	1	1	1	3	3	3	4	4	4	4	4	2		0
3	3	4	3	4	3	3	4	4	4	4	4	4	5	5	5	5	5	1	1	1	1	1	1	2	3	4	4	3	4	4	4		0
1	1	2	3	3	3	3	3	3	4	4	3	1	3	5	1	2	3	5	1	1	2	2	4	1	3	3	3	4	2	5	3		0
3	2	2	2	4	4	3	5	5	5	4	2	2	4	3	3	4	3	3	3	3	3	3	3	3	2	3	3	4	3	3	3		0
5	5	4	4	4	4	5	5	5	5	5	4	4	5	5	4	4	4	5	4	5	1	1	5	5	5	5	5	5	5	5	5		0
3	4	1	3	4	3	3	5	5	5	5	5	5	5	5	3	5	5	5	3	5	3	5	5	5	4	3	3	5	3	3	5		0
3	3	3	3	3	4	4	3	3	3	3	4	4	4	4	4	4	4	3	3	3	3	3	3	4	3	4	3	3	3	3	3		0
3	2	4	3	2	2	4	5	5	3	3	4	3	5	5	2	5	5	3	1	3	1	1	4	5	5	5	3	4	4	5	3		0
2	2	3	4	4	3	3	3	3	3	3	5	5	5	5	3	3	4	2	2	5	4	5	5	3	4	1	3	4	2	5	3		0
3	3	3	3	3	4	4	3	5	5	5	5	5	5	5	5	5	5	3	1	1	1	1	3	5	5	3	3	3	3	3	3		0
5	5	5	5	5	5	5	5	5	5	5	5	5	5	5	5	5	5	1	1	1	1	1	1	5	5	5	5	5	5	5	5		0
1	2	3	4	4	4	4	4	4	4	4	5	5	5	5	5	5	5	5	1	5	1	4	5	4	2	1	3	4	4	2	1		0
3	3	3	3	5	3	4	5	5	5	5	5	1	5	5	3	2	2	1	1	1	1	1	5	5	5	5	5	5	5	5	4		0
4	4	3	4	4	3	5	4	4	4	4	4	4	4	4	2	3	4	4	4	5	5	4	5	4	4	3	1	4	5	4	4		0
3	3	5	5	4	4	5	5	5	5	5	3	2	5	5	5	5	5	5	3	5	4	4	5	5	5	4	3	5	5	5	3		0
1	3	4	3	3	3	5	4	4	5	3	3	3	3	3	4	4	5	1	5	3	4	3	3	3	3	4	4	4	4	3	5		0
1	3	3	3	3	3	4	4	4	5	4	4	4	4	4	3	4	5	4	3	4	4	4	5	5	4	4	3	4	3	4	5		0
1	4	4	5	5	5	5	5	5	5	5	5	5	5	5	5	5	5	4	5	3	5	3	5	5	4	5	5	5	5	5	5		0
5	4	5	4	5	4	5	5	4	5	5	4	5	4	5	4	5	4	5	4	5	4	5	4	5	4	5	4	4	5	4	5		0
3	3	2	4	4	3	3	3	3	3	2	3	2	2	2	1	1	1	5	5	5	5	5	4	3	2	1	3	1	1	1	4		0
2	3	3	3	3	2	5	3	3	3	3	3	1	3	3	1	3	2	2	2	5	1	2	5	3	3	3	3	3	3	3	3		0
4	4	4	4	4	4	4	2	3	2	3	3	3	4	3	3	3	3	2	1	3	1	1	4	4	4	3	4	4	1	1	3		0
5	5	5	5	5	5	5	5	5	5	5	5	5	5	5	3	4	5	1	1	3	1	1	3	5	1	3	3	5	2	5	1		0
3	3	3	2	4	4	3	4	4	4	3	5	4	4	3	3	5	5	1	1	2	2	1	2	4	3	3	3	4	3	4	4		0
4	4	5	5	5	5	5	3	3	3	3	1	3	3	3	3	3	3	5	5	5	5	5	5	2	2	2	3	2	2	2	2		0
3	4	2	5	3	2	5	4	3	3	3	4	4	4	4	4	4	4	5	2	5	3	2	5	3	3	4	3	3	2	3	3		0
5	5	5	5	5	5	5	5	5	5	5	5	5	5	5	5	5	5	1	1	1	1	1	1	5	5	5	4	5	5	5	5		0
3	3	3	3	3	3	3	3	3	3	3	3	3	4	4	1	3	3	5	4	2	5	5	4	3	3	2	1	3	1	2	2		0
2	2	3	3	1	2	2	5	4	4	3	2	3	5	5	2	3	4	3	2	4	5	4	5	3	4	3	2	2	2	3	3		0
1	2	3	4	5	5	4	1	2	3	4	1	2	3	4	5	4	2	5	4	3	2	1	1	1	2	3	3	3	2	1	2		0
1	1	1	5	5	1	5	5	5	5	5	5	5	5	5	5	5	5	5	1	5	5	5	5	5	1	1	5	5	1	1	1		0
4	3	2	4	2	3	3	5	5	5	3	3	3	4	4	4	3	5	5	3	5	5	5	5	5	5	5	5	5	3	5	5		0
2	2	2	3	3	2	2	3	2	2	2	2	2	2	3	1	2	2	5	5	5	5	5	5	3	3	2	2	2	2	2	3		0
3	5	4	5	5	3	5	5	5	5	3	5	3	5	3	3	3	3	5	3	5	5	3	5	5	5	3	3	5	3	3	3		0
3	3	5	4	4	4	4	5	5	5	5	5	5	5	5	5	5	5	3	4	4	3	4	3	5	5	5	5	5	5	5	5		0
5	3	3	3	3	3	3	4	4	4	3	4	3	5	3	2	3	3	5	5	5	4	4	4	3	4	3	4	4	3	3	3		0
3	4	4	4	4	4	4	3	3	4	5	5	5	3	3	5	4	4	3	2	5	4	5	5	5	3	3	3	4	4	5	4		0
1	1	1	1	1	1	1	4	4	5	3	3	3	4	4	3	4	4	5	5	5	5	5	5	5	5	5	3	3	5	5	5		0
3	3	3	4	4	3	2	2	3	2	3	4	1	1	1	1	1	1	1	1	1	1	1	3	2	1	2	1	2	1	3	3		0
4	3	3	4	4	4	3	3	3	4	3	3	4	5	5	3	4	4	4	3	5	3	3	5	5	3	2	3	4	3	3	3		0
5	5	4	5	4	5	5	3	3	3	3	4	1	1	1	1	2	2	4	3	4	3	3	3	5	2	4	4	3	3	3	3		0
5	5	5	5	5	4	5	4	4	4	4	5	4	4	2	1	4	4	4	1	4	1	1	4	4	1	3	3	4	5	3	3		0
4	4	5	5	4	4	5	3	4	5	4	3	3	4	3	2	3	3	3	3	5	5	5	5	3	3	2	2	3	2	2	4		0
3	3	3	3	4	4	4	4	4	4	4	4	3	4	3	4	3	4	3	2	4	3	2	4	4	3	3	4	3	3	4	3		0
3	3	4	3	3	3	4	3	3	3	3	2	2	4	4	2	2	3	5	3	4	3	4	5	4	3	2	2	3	3	3	2		0
3	3	3	3	3	3	3	3	2	3	4	3	4	5	4	3	2	3	3	3	4	2	3	4	4	3	4	3	2	3	4	2		0
3	5	4	4	4	4	4	5	5	4	4	5	5	5	5	3	5	5	1	1	5	1	1	5	2	5	5	4	4	4	4	4		0
3	2	2	2	3	3	3	4	4	3	3	2	1	2	2	1	2	2	5	5	5	4	5	5	3	4	2	2	2	2	2	4		0
3	3	4	3	5	3	5	5	5	5	3	5	5	5	5	3	5	5	3	3	5	3	3	5	5	3	2	1	3	3	4	1		0
5	5	5	5	5	5	5	5	5	5	5	5	5	5	5	5	5	5	1	1	1	1	1	3	5	3	5	5	5	5	5	5		0
2	2	3	2	3	3	3	4	4	3	3	4	4	4	4	3	5	5	2	2	2	2	1	3	4	5	4	3	3	4	3	4		0
3	3	5	4	3	4	3	4	5	4	5	1	1	5	3	5	5	3	5	1	2	1	1	5	5	5	4	5	3	5	3	5		0
1	1	1	1	1	1	3	3	3	2	1	4	1	5	5	1	1	3	5	5	5	5	5	5	1	2	3	2	2	1	1	1		0
2	2	2	2	4	2	5	3	3	3	3	2	2	5	5	1	5	1	5	5	5	5	5	5	5	2	1	1	1	2	3	1		0
1	3	2	2	2	3	2	4	3	3	3	4	3	3	3	1	3	3	3	3	3	3	3	3	3	1	1	1	3	2	1	1		0
3	3	3	3	3	3	3	3	3	3	3	4	3	4	4	3	4	4	4	1	5	5	4	5	3	3	3	3	3	3	4	4		0
2	2	2	3	3	2	4	4	4	3	4	5	4	2	2	3	3	3	4	2	5	2	1	5	4	5	3	2	4	3	3	5		0
2	2	2	3	2	2	2	3	3	3	3	3	3	3	3	3	3	3	3	4	3	3	2	2	3	3	3	3	3	3	4	3		0
5	5	5	5	5	5	5	5	5	5	5	5	5	5	5	5	5	5	2	1	2	1	1	2	3	5	2	3	4	2	4	4		0
3	3	3	3	3	3	3	5	5	5	5	5	5	5	5	5	5	5	3	3	3	3	3	3	3	4	2	3	3	3	3	3		0
3	3	3	4	4	3	4	3	3	4	3	3	3	3	3	3	3	3	3	3	4	4	3	4	2	3	3	3	3	3	3	2		0
3	4	3	5	5	5	5	5	5	5	5	5	5	5	5	5	5	5	4	4	4	5	5	4	3	4	2	2	3	3	2	4		0
3	3	2	3	3	3	4	3	3	3	3	3	2	4	4	3	4	4	4	4	5	4	3	5	3	2	2	2	4	2	2	2		0
2	2	2	4	4	2	2	5	5	5	5	5	2	5	5	1	5	5	5	5	5	5	5	5	5	2	2	1	5	1	1	1		0
3	3	3	3	4	2	3	3	3	3	3	3	3	3	3	4	3	3	4	3	3	3	3	4	3	4	4	3	2	3	3	4		0
1	1	4	4	4	3	4	4	4	4	4	4	4	4	3	2	3	2	3	2	4	3	4	4	4	3	3	3	3	2	3	3		0
3	3	5	3	5	5	5	3	3	3	3	4	2	3	3	2	4	5	3	2	3	4	2	5	5	4	2	2	2	3	2	2		0
1	5	5	5	5	4	5	5	5	5	5	5	5	5	5	5	5	5	3	1	5	1	1	3	5	5	5	5	5	5	5	5		0
3	3	2	5	5	3	3	3	3	3	3	3	3	3	3	3	3	3	5	4	5	3	5	5	4	3	1	1	2	1	2	2		0
3	3	3	3	3	3	3	4	4	4	4	3	3	3	3	3	3	3	4	4	4	4	4	4	3	4	3	2	2	3	2	2		0
2	3	3	3	3	2	3	3	3	4	3	3	4	3	4	3	4	2	3	4	2	4	3	4	2	3	2	2	3	2	3	4		0
3	3	3	3	4	3	3	5	5	5	5	5	5	4	5	5	5	5	5	5	5	5	5	5	2	3	3	3	3	3	2	5		0
4	5	5	5	5	4	5	5	5	5	5	5	5	5	5	5	5	5	5	5	5	1	1	5	1	2	3	4	3	3	3	3		0
3	3	3	3	3	3	3	2	2	3	3	2	3	4	4	2	3	3	3	2	3	3	3	2	3	3	2	2	3	2	2	3		0
5	5	5	5	5	4	5	5	5	5	5	2	5	4	2	2	4	2	1	1	1	1	1	5	4	2	3	2	2	2	2	2		0
3	4	3	3	2	3	3	3	3	3	4	3	3	3	2	1	2	2	1	1	2	1	1	3	2	2	3	3	4	2	3	3		0
4	4	5	4	4	4	4	5	5	5	5	5	2	5	5	1	5	1	1	1	1	1	1	1	1	1	1	1	1	1	1	1		0
3	5	5	5	3	4	4	5	5	5	5	5	2	2	2	1	4	1	3	3	4	3	3	5	2	2	3	2	2	5	2	2		0
4	4	4	5	5	3	5	5	5	5	4	4	1	4	1	2	4	4	5	5	5	4	1	4	4	2	2	2	2	4	2	2		0
4	4	4	4	4	4	4	5	5	5	5	1	2	5	2	1	2	2	1	1	1	1	1	1	1	2	2	2	3	2	1	2		0
3	3	4	3	4	5	5	4	3	4	3	3	2	4	3	2	3	3	3	2	3	4	3	5	3	3	2	3	4	3	4	4		0
1	1	1	1	1	1	1	2	2	3	2	1	3	3	3	1	1	1	5	3	5	3	5	5	2	2	2	1	3	2	3	2		0
3	4	3	5	5	2	3	4	4	3	3	2	2	5	1	3	2	1	5	4	5	5	5	5	5	5	1	1	4	4	3	4		0
2	2	2	3	4	3	3	4	4	4	4	3	3	4	4	3	4	4	3	3	5	5	5	5	2	2	2	2	3	3	3	2		0
3	3	3	3	3	3	3	3	3	3	3	3	3	3	3	3	3	3	5	5	5	5	5	5	3	3	3	3	3	3	3	3		0
1	2	3	3	4	3	3	4	3	4	3	3	3	3	3	3	3	3	3	3	3	3	3	3	3	3	3	2	3	3	3	3		0
4	5	5	5	5	5	5	5	5	4	5	5	2	5	1	2	4	4	4	4	4	4	4	4	2	2	3	2	2	2	2	3		0
1	1	3	3	1	1	3	1	2	1	1	3	1	3	3	1	3	3	5	5	5	5	5	3	1	1	1	2	1	1	1	1		0
4	4	4	3	4	5	3	4	4	4	4	4	2	4	2	4	2	5	4	3	4	4	5	4	4	2	2	2	4	2	4	2		0
1	3	1	1	2	1	2	3	3	3	3	3	3	2	4	2	2	4	2	1	5	5	5	5	3	1	1	1	1	1	1	1		0
3	5	5	5	5	3	5	5	5	5	5	5	1	1	1	1	2	3	5	2	5	5	5	5	4	1	1	1	3	4	2	4		0
1	1	5	4	2	2	1	3	3	3	2	2	2	2	2	2	2	1	2	2	5	1	1	5	3	2	1	2	2	2	2	2		0
3	3	3	5	5	3	3	5	5	5	5	3	3	2	5	2	2	2	3	2	5	4	4	5	2	3	3	2	2	2	2	3		0
4	4	3	3	4	5	4	5	5	5	5	5	4	5	4	4	4	2	3	3	5	3	5	5	3	4	3	3	3	4	5	5		0
1	1	1	5	3	1	3	1	1	1	1	1	1	1	1	1	1	1	5	5	5	5	5	5	2	1	1	1	1	1	2	2		0
5	4	5	4	5	5	5	5	5	5	5	3	3	3	3	4	3	3	5	5	5	4	1	5	3	3	2	2	2	2	3	2		0
2	2	2	2	3	2	3	3	2	2	2	3	3	3	3	3	4	3	2	2	3	3	2	3	1	1	3	2	3	3	3	3		0
3	3	5	5	3	5	5	5	5	5	5	3	4	3	3	2	3	4	1	3	3	3	3	3	3	2	3	3	3	3	2	2		0
5	3	3	3	3	4	3	3	4	4	4	4	3	2	3	3	3	3	4	3	4	4	4	3	3	4	3	3	3	2	4	4		0
3	4	4	4	4	4	4	4	4	4	4	3	1	4	4	3	3	4	4	4	4	4	4	4	2	3	3	3	3	3	4	4		0
1	1	1	1	1	1	1	1	1	1	1	3	3	3	3	3	3	3	3	3	3	3	3	3	3	3	3	3	3	3	3	3		0
1	1	1	1	1	1	1	5	3	3	3	2	2	2	3	2	5	3	3	3	3	3	2	2	4	4	3	2	3	3	2	2		0
3	3	4	2	2	2	3	3	2	2	2	3	3	3	3	3	3	3	5	5	5	5	4	5	2	2	3	3	2	3	3	5		0
3	4	5	3	3	3	3	4	4	4	4	3	4	3	3	5	3	3	4	4	4	4	5	5	2	2	3	3	3	4	2	3		0
3	2	2	2	3	3	2	3	3	3	3	2	1	2	3	1	3	3	5	3	3	3	4	4	2	3	1	2	2	2	3	2		0
1	2	3	4	4	2	2	1	2	4	2	3	3	2	3	1	2	1	1	4	5	5	5	5	2	2	3	1	2	2	1	4		0
5	5	5	5	5	5	5	3	5	3	3	3	1	3	2	3	3	3	1	1	5	1	1	5	2	1	1	1	2	1	3	3		0
2	2	2	2	2	2	4	2	2	3	3	3	3	3	3	3	3	3	5	2	4	2	2	5	3	2	1	1	3	1	1	1		0
5	5	5	5	5	5	5	5	5	2	2	3	3	3	2	3	2	3	4	3	5	3	3	4	2	2	2	2	3	2	4	3		0
2	2	2	2	2	2	2	1	3	2	1	3	1	1	1	1	1	1	1	5	5	1	1	1	1	1	1	1	1	2	1	5		0
3	3	3	4	4	3	4	3	4	4	4	4	4	2	2	2	3	3	4	4	4	4	4	4	2	2	2	3	2	3	3	3		0
3	5	3	5	5	5	5	5	5	5	5	5	5	2	2	1	5	5	1	5	5	1	5	5	2	1	1	1	2	2	2	3		0
3	3	3	3	3	3	3	1	1	1	1	1	1	1	1	1	1	1	5	3	5	5	5	5	1	1	1	1	1	1	1	1		0
1	2	2	1	1	1	3	3	2	3	3	2	2	3	3	3	3	3	3	2	2	2	2	2	3	3	2	2	3	2	1	2		0
2	5	5	5	5	5	5	5	5	5	5	2	2	2	2	2	2	2	1	1	1	1	1	5	2	2	2	2	2	2	2	2		0
1	3	3	3	3	4	3	4	3	3	5	3	3	5	5	3	4	3	4	5	5	3	3	5	3	3	3	3	3	3	3	3		0
1	1	3	1	1	3	3	3	2	3	4	4	3	1	2	1	1	1	3	1	5	3	3	4	2	2	2	3	2	3	3	2		0
5	5	5	5	5	3	5	3	2	5	3	1	1	3	2	1	3	3	1	1	1	1	1	1	3	3	2	3	2	3	2	4		0
1	2	2	2	2	2	2	4	4	5	5	2	2	2	1	1	1	2	5	4	5	4	5	5	2	2	1	2	3	3	3	3		0
2	2	2	2	2	2	2	5	5	5	5	3	2	2	1	2	2	5	1	1	1	1	1	1	3	3	3	2	3	3	3	2		0
1	2	3	4	3	1	2	3	3	3	2	4	1	1	1	1	4	4	1	1	1	1	5	1	3	3	3	1	5	1	3	4		0
4	4	3	5	5	4	5	4	4	4	4	3	3	3	3	3	3	3	4	4	5	3	5	5	1	1	2	1	3	3	3	3		0
1	1	2	4	2	1	3	4	4	4	4	2	2	2	2	2	3	3	5	5	5	5	5	5	2	2	2	2	2	3	3	3		0
3	3	5	3	5	4	5	5	5	5	5	1	3	3	3	3	3	3	3	1	3	1	1	3	5	5	3	1	4	1	5	4		0
3	4	4	4	4	3	4	4	4	4	4	1	3	1	1	3	1	3	2	3	3	4	5	4	3	2	3	2	2	2	2	3		0
3	3	3	3	3	3	5	1	1	1	1	1	1	1	1	1	1	1	1	1	1	1	5	1	1	1	3	1	1	1	1	3		0
1	2	3	3	3	3	3	3	3	3	3	3	2	2	2	2	1	1	3	2	2	2	4	4	3	2	1	1	2	2	1	1		0
1	3	1	3	2	2	3	2	2	3	3	1	1	4	1	2	4	4	3	4	3	4	5	2	2	1	1	1	3	1	1	1		0
1	5	5	5	5	5	5	1	1	1	1	5	1	1	1	1	5	1	1	5	5	5	5	5	3	1	2	2	2	2	2	1		0
3	4	4	4	3	4	4	3	3	4	3	3	4	1	1	1	1	4	3	3	4	4	4	4	3	3	3	2	2	2	3	3		0
1	1	1	1	1	1	1	5	5	5	1	1	1	1	1	1	1	1	5	1	1	1	1	1	2	2	2	2	2	1	2	2		0
5	4	5	4	5	5	4	5	4	5	4	5	4	5	4	5	5	4	5	4	5	4	5	5	1	4	2	4	2	2	2	2		0
3	3	2	2	2	2	3	3	3	3	3	3	3	3	3	3	3	3	3	4	3	3	4	4	3	2	2	2	2	2	2	3		0
4	5	5	5	5	5	5	5	5	5	4	3	2	5	5	3	5	1	2	2	4	3	5	5	2	2	2	2	3	3	3	2		0
3	3	3	3	3	3	3	3	3	3	3	3	1	4	4	4	3	1	4	2	3	4	4	3	3	4	3	3	3	3	3	3		0
4	3	3	5	3	3	3	4	3	4	5	1	2	4	5	1	1	1	5	5	4	4	3	3	1	2	3	2	2	1	1	1		0
3	3	3	3	3	2	3	2	2	2	2	2	2	2	2	2	2	2	1	1	1	1	1	1	2	2	2	2	2	2	2	2		0
3	5	5	5	5	5	5	5	5	5	5	3	3	3	1	5	5	3	1	1	1	1	1	1	2	3	2	1	1	2	1	1		0
3	3	3	3	3	3	3	1	1	1	1	1	1	1	1	4	4	4	5	5	5	5	5	5	2	2	2	2	2	2	2	2		0
1	2	3	4	5	5	4	5	4	3	2	3	2	1	4	3	1	2	5	3	1	3	4	2	2	4	3	2	2	3	2	5		0
3	3	3	3	3	3	3	3	3	3	3	5	2	2	2	2	2	5	4	4	4	4	4	4	2	2	2	4	1	2	2	4		0
3	3	4	3	3	2	3	1	1	1	1	1	1	1	1	1	1	1	5	4	5	4	4	5	1	1	3	1	3	2	1	2		0
2	2	3	3	3	2	2	5	5	5	4	2	1	1	1	2	2	5	5	3	5	5	5	5	2	2	2	3	1	3	3	4		0
1	2	2	3	1	5	2	1	3	5	2	2	3	1	2	1	3	5	2	1	3	4	2	3	2	1	2	3	3	2	2	3		0
3	4	3	5	3	4	3	4	3	4	4	3	2	1	1	5	3	4	3	4	3	4	5	3	3	2	3	1	3	1	3	1		0
3	3	3	3	3	3	4	3	3	3	3	3	3	1	3	3	3	3	4	2	2	3	3	3	2	3	3	3	3	3	3	3		0
5	4	4	4	4	5	5	5	5	5	5	4	3	3	3	1	4	4	4	4	3	4	5	1	2	3	1	3	1	2	2	3		0
3	3	3	3	3	3	3	3	3	3	3	3	3	3	3	3	3	3	3	3	2	2	3	3	2	2	2	2	2	2	2	3		0
