# Supplementary material
Source: Research Square preprint supplement (doi:10.21203/rs.3.rs-9700335/v1)
Supplement: Supplementary file 3 [file 7f0f9b7273426270563ae923.docx]

Influencing Factors Assessment Questionnaire

All scales use a 5-point Likert scoring method (1=Strongly Disagree, 2=Disagree, 3=Neutral, 4=Agree, 5=Strongly Agree).

**Teacher Support**

1. My mathematics teacher always encourages us to explore different problem-solving methods.

2. When I encounter difficulties in mathematics learning, the teacher will patiently explain the thinking process to me.

3. My mathematics teacher listens carefully to my different views on mathematical problems.

4. The teacher guides me to think independently and find answers to mathematical problems through questioning.

5. My mathematics teacher promptly affirms every small progress I make in mathematics learning.

6. When I make mistakes, the teacher helps me analyze the causes of errors rather than simply criticizing.

7. My mathematics teacher encourages us to boldly raise our own questions in class.

8. The teacher adjusts the teaching pace and methods according to our learning situation.

**II. Growth Mindset**

1. In mathematics learning, I can significantly change my level of intelligence.

2. No matter what my current mathematics grades are, I have the ability to improve them substantially.

3. As long as I put in enough effort, I can learn any mathematical knowledge well.

4. Difficulties encountered in mathematics learning are good opportunities to improve my abilities.

**III. Mathematics Anxiety**

1. I often worry that I will encounter difficulties when learning mathematical knowledge.

2. Just thinking about having a mathematics class makes me feel nervous and uneasy.

3. I feel extremely anxious when facing mathematics exams.

4. I try to avoid activities that require the use of mathematics.

5. When others ask me to solve a mathematical problem, I feel flustered.

6. I am worried that my mathematics grades will be much worse than those of other classmates.

**IV. Mathematics Self-Efficacy**

1. I always believe that I have sufficient ability to solve various problems encountered in mathematics learning.

2. Even when faced with very difficult mathematical problems, I believe I can solve them independently.

3. I am confident in mastering all the content taught by the teacher in mathematics class.

4. When faced with unfamiliar mathematical knowledge, I believe I can learn it quickly.

5. I can complete all assignments assigned by my mathematics teacher well.

6. Even under time pressure, I can complete mathematical tasks accurately.

7. I believe I can achieve ideal grades in mathematics exams.

8. When I encounter setbacks in mathematics learning, I believe I can recover quickly and continue to work hard.

**V. Mathematics Learning Attitude**

1. I think learning mathematics is very helpful for my daily life.

2. I find mathematics to be a very interesting subject.

3. Learning mathematics can improve my logical thinking ability.

4. I am willing to spend extra time learning and researching mathematical problems.

5. Mathematical knowledge is very important for my future study and work.

6. I enjoy solving challenging mathematical problems.

7. I think learning mathematics well is a very fulfilling thing.
