# Supplementary material
Source: Research Square preprint supplement (doi:10.21203/rs.3.rs-9700335/v1)
Supplement: Supplementary file 4 [file 81d3f26de81f903c9642a9c6.docx]

SPSS Analysis Output

## **Descriptive Statistics**


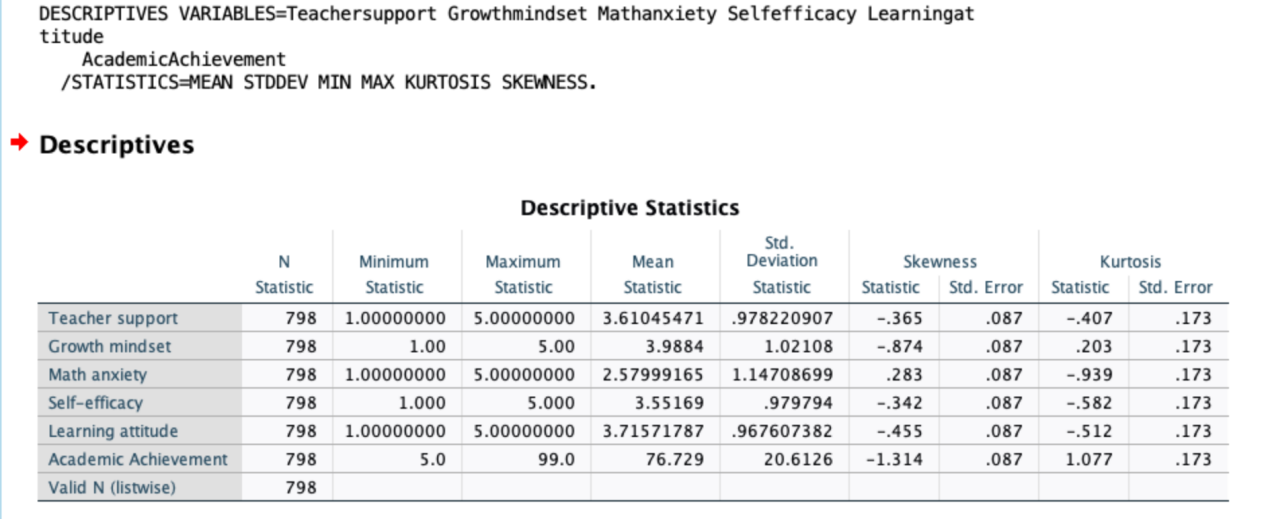


## **Bivariate Correlation Analysis**


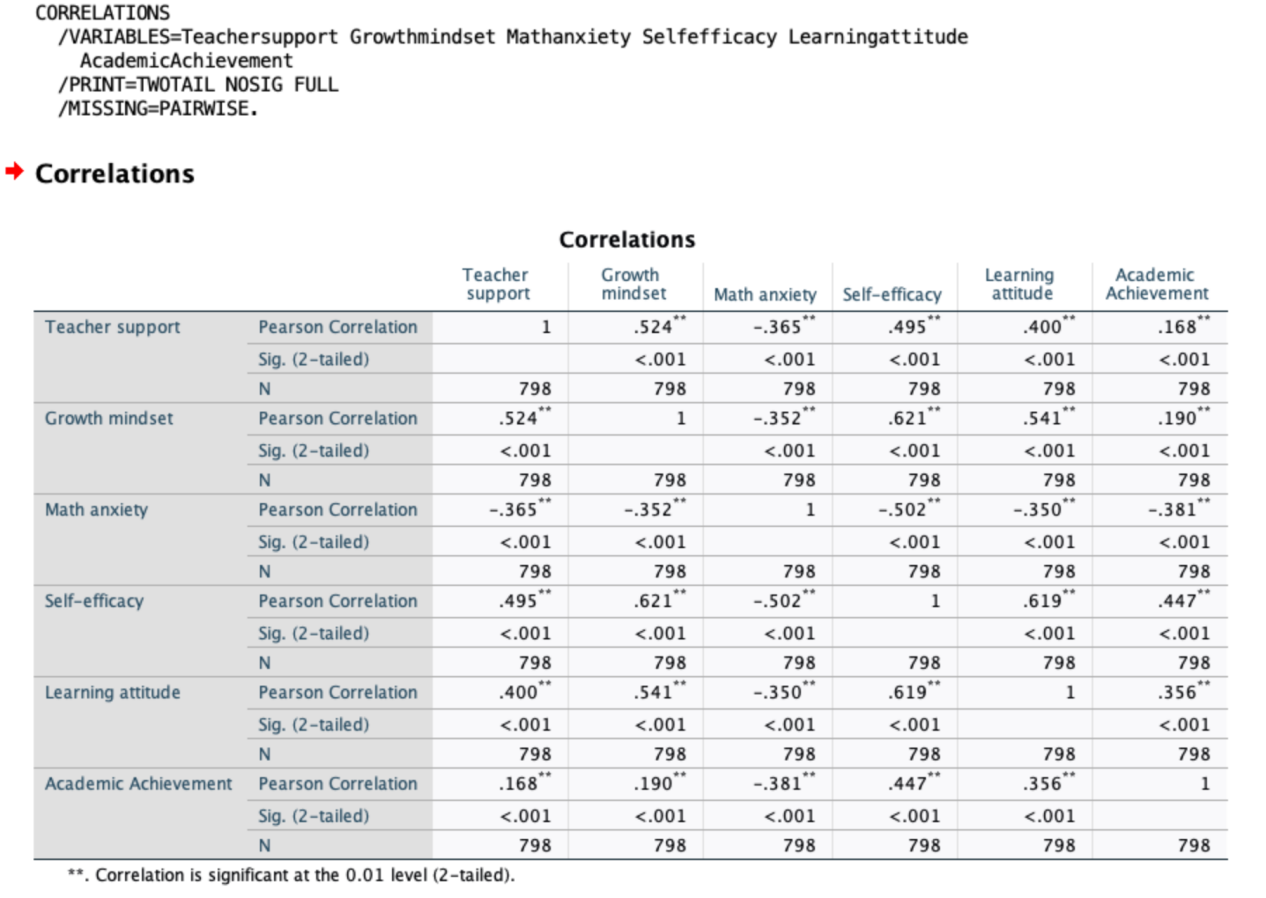


## **Group Difference Tests**

## **
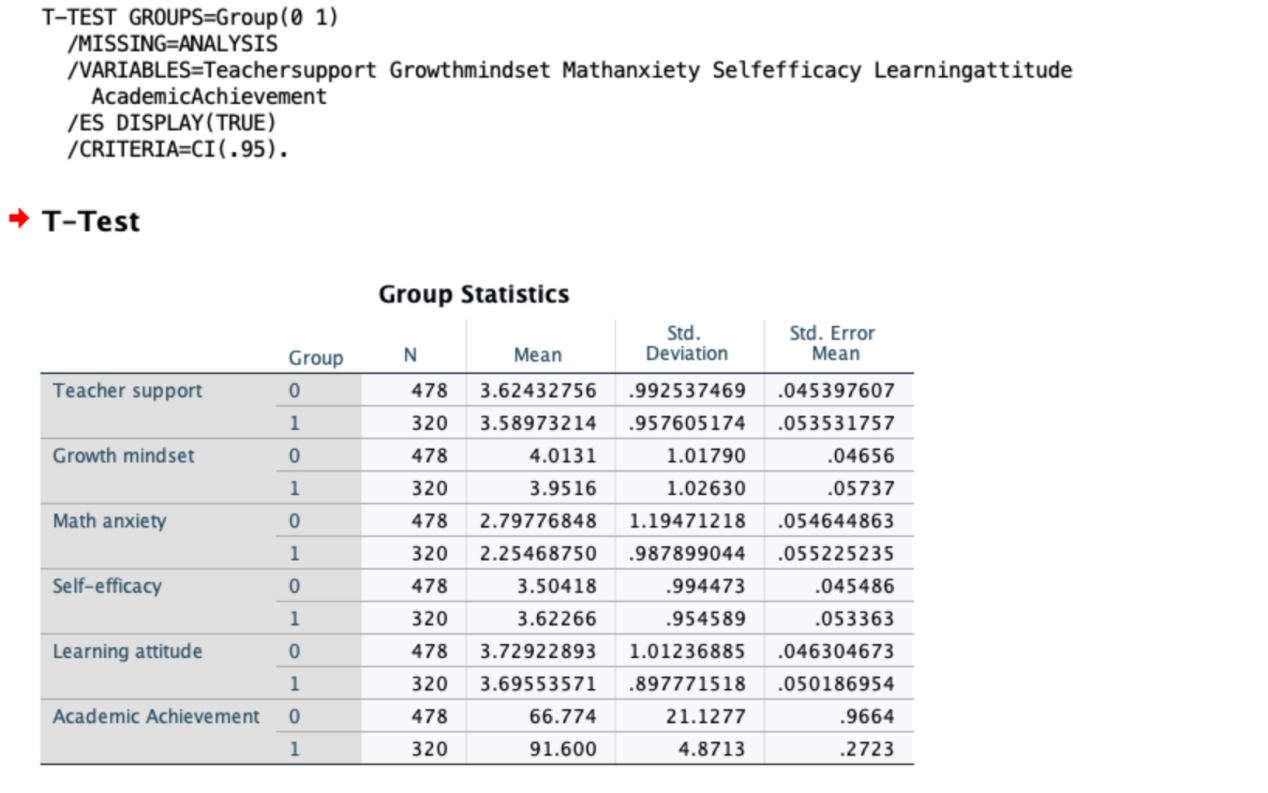

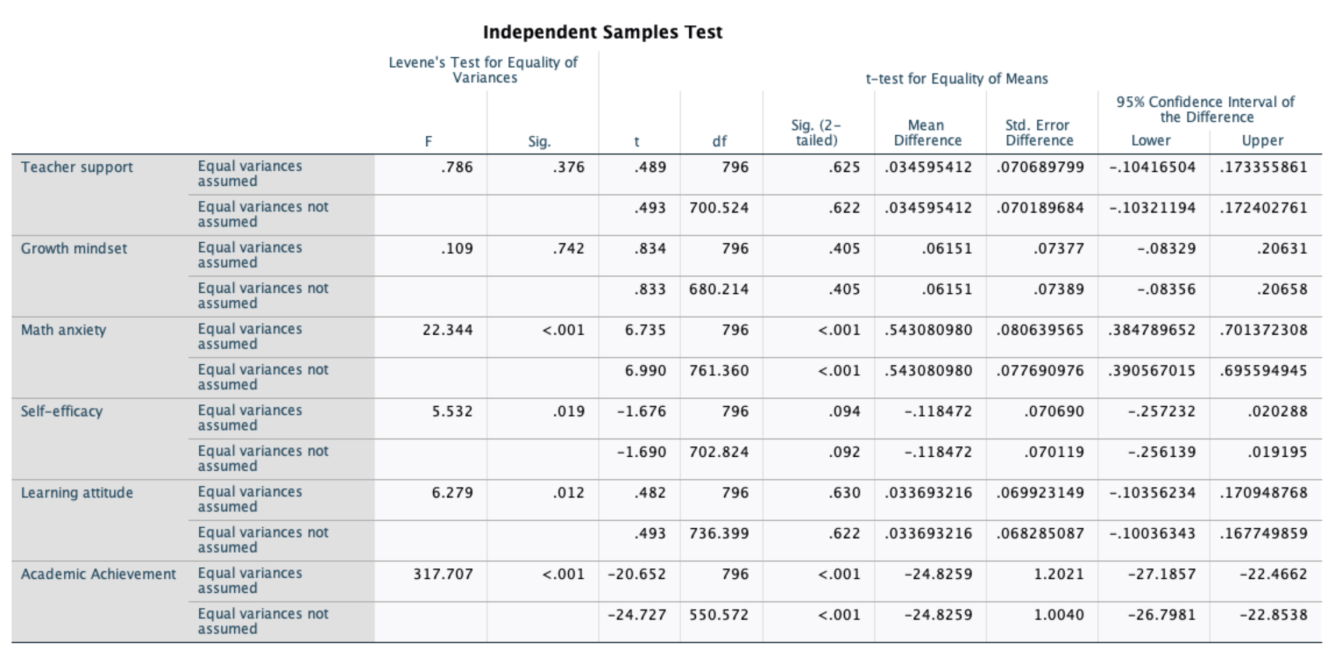

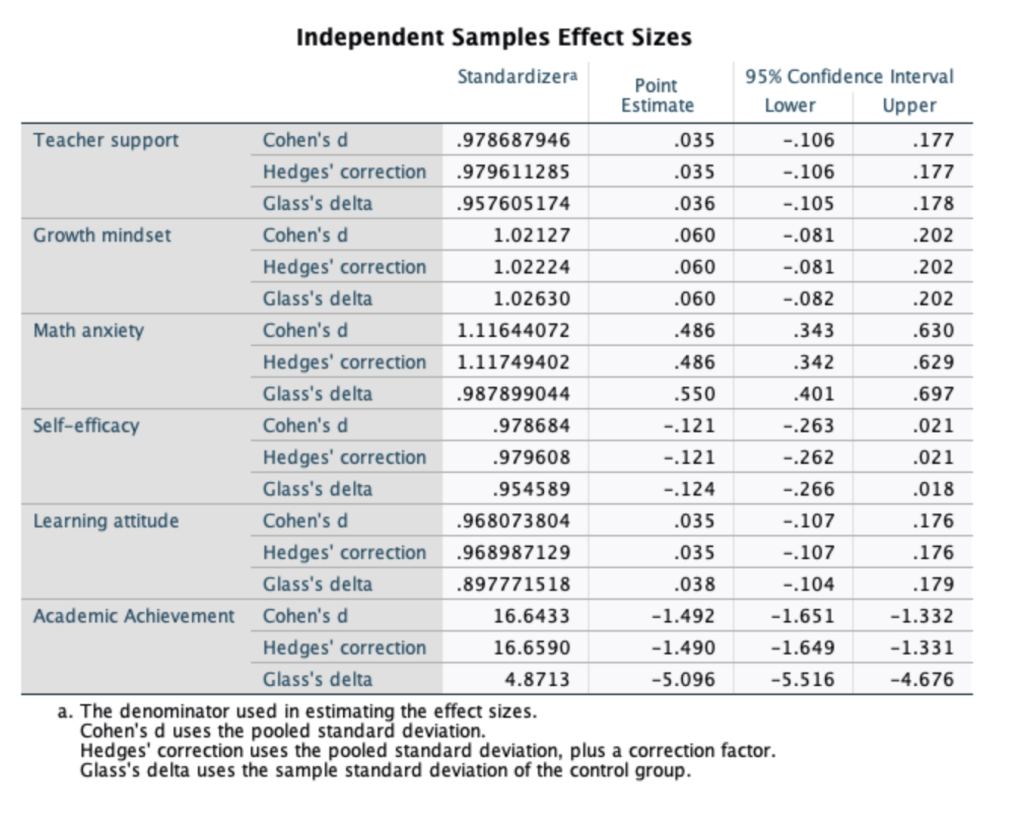
**

## **Confirmatory Factor Analysis (CFA) & Output**

**Overall Six-Factor Confirmatory Factor Analysis**

| mplus TITLE: Confirmatory Factor Analysis (Six-Factor Model) - Reliability and Validity Test; DATA: FILE IS data.dat; ! Your data file (identical to the multi-group analysis) VARIABLE:   NAMES = TS1-TS8 GM1-GM4 MAn1-MAn6 SE1-SE8 LA1-LA7 SC group;  USEVARIABLES = TS1-TS8 GM1-GM4 MAn1-MAn6 SE1-SE8 LA1-LA7; ! Use only scale items, exclude SC and group ANALYSIS:  ESTIMATOR = MLR; ! Robust Maximum Likelihood estimator (preferred for non-normal data)  PROCESSORS = 4; ! Enable multi-threading for faster computation (adjust based on your CPU) MODEL:  ! Define measurement model (factor loadings labeled p1-p33, fully consistent with measurement invariance tests)  TS BY TS1 (p1) TS2 (p2) TS3 (p3) TS4 (p4) TS5 (p5) TS6 (p6) TS7 (p7) TS8 (p8);  GM BY GM1 (p9) GM2 (p10) GM3 (p11) GM4 (p12);  MAn BY MAn1 (p13) MAn2 (p14) MAn3 (p15) MAn4 (p16) MAn5 (p17) MAn6 (p18);  SE BY SE1 (p19) SE2 (p20) SE3 (p21) SE4 (p22) SE5 (p23) SE6 (p24) SE7 (p25) SE8 (p26);  LA BY LA1 (p27) LA2 (p28) LA3 (p29) LA4 (p30) LA5 (p31) LA6 (p32) LA7 (p33);   ! Define error variances (labeled e1-e33 for CR and AVE calculation)  TS1 (e1); TS2 (e2); TS3 (e3); TS4 (e4); TS5 (e5); TS6 (e6); TS7 (e7); TS8 (e8);  GM1 (e9); GM2 (e10); GM3 (e11); GM4 (e12);  MAn1 (e13); MAn2 (e14); MAn3 (e15); MAn4 (e16); MAn5 (e17); MAn6 (e18);  SE1 (e19); SE2 (e20); SE3 (e21); SE4 (e22); SE5 (e23); SE6 (e24); SE7 (e25); SE8 (e26);  LA1 (e27); LA2 (e28); LA3 (e29); LA4 (e30); LA5 (e31); LA6 (e32); LA7 (e33);  ! Automatically calculate Composite Reliability (CR) and Average Variance Extracted (AVE) MODEL CONSTRAINT:  NEW(CR_TS AVE_TS CR_GM AVE_GM CR_MAn AVE_MAn CR_SE AVE_SE CR_LA AVE_LA);   ! Teacher Support (TS): 8 items  CR_TS = (p1+p2+p3+p4+p5+p6+p7+p8)**2 / ((p1+p2+p3+p4+p5+p6+p7+p8)**2 + e1+e2+e3+e4+e5+e6+e7+e8);  AVE_TS = (p1**2+p2**2+p3**2+p4**2+p5**2+p6**2+p7**2+p8**2) / (p1**2+p2**2+p3**2+p4**2+p5**2+p6**2+p7**2+p8**2 + e1+e2+e3+e4+e5+e6+e7+e8);   ! Growth Mindset (GM): 4 items  CR_GM = (p9+p10+p11+p12)**2 / ((p9+p10+p11+p12)**2 + e9+e10+e11+e12);  AVE_GM = (p9**2+p10**2+p11**2+p12**2) / (p9**2+p10**2+p11**2+p12**2 + e9+e10+e11+e12);   ! Math Anxiety (MAn): 6 items  CR_MAn = (p13+p14+p15+p16+p17+p18)**2 / ((p13+p14+p15+p16+p17+p18)**2 + e13+e14+e15+e16+e17+e18);  AVE_MAn = (p13**2+p14**2+p15**2+p16**2+p17**2+p18**2) / (p13**2+p14**2+p15**2+p16**2+p17**2+p18**2 + e13+e14+e15+e16+e17+e18);   ! Self-Efficacy (SE): 8 items  CR_SE = (p19+p20+p21+p22+p23+p24+p25+p26)**2 / ((p19+p20+p21+p22+p23+p24+p25+p26)**2 + e19+e20+e21+e22+e23+e24+e25+e26);  AVE_SE = (p19**2+p20**2+p21**2+p22**2+p23**2+p24**2+p25**2+p26**2) / (p19**2+p20**2+p21**2+p22**2+p23**2+p24**2+p25**2+p26**2 + e19+e20+e21+e22+e23+e24+e25+e26);   ! Learning Attitude (LA): 7 items  CR_LA = (p27+p28+p29+p30+p31+p32+p33)**2 / ((p27+p28+p29+p30+p31+p32+p33)**2 + e27+e28+e29+e30+e31+e32+e33);  AVE_LA = (p27**2+p28**2+p29**2+p30**2+p31**2+p32**2+p33**2) / (p27**2+p28**2+p29**2+p30**2+p31**2+p32**2+p33**2 + e27+e28+e29+e30+e31+e32+e33);  OUTPUT:   TECH1 TECH4 STANDARDIZED CINTERVAL MODINDICES(3.84);   ! Output: parameter estimates, standardized results, 95% confidence intervals, modification indices (only show values > 3.84, p < 0.05) |
| --- |

**Single-Factor Confirmatory Factor Analysis (Individual Scale Testing)**

| mplus TITLE: Single-Factor CFA - Teacher Support (TS); DATA: FILE IS data.dat; VARIABLE:   NAMES = TS1-TS8 GM1-GM4 MAn1-MAn6 SE1-SE8 LA1-LA7 SC group;  USEVARIABLES = TS1-TS8; ! Use only items from this scale ANALYSIS: ESTIMATOR = MLR; MODEL:  TS BY TS1-TS8; OUTPUT:  STANDARDIZED CINTERVAL MODINDICES; |
| --- |


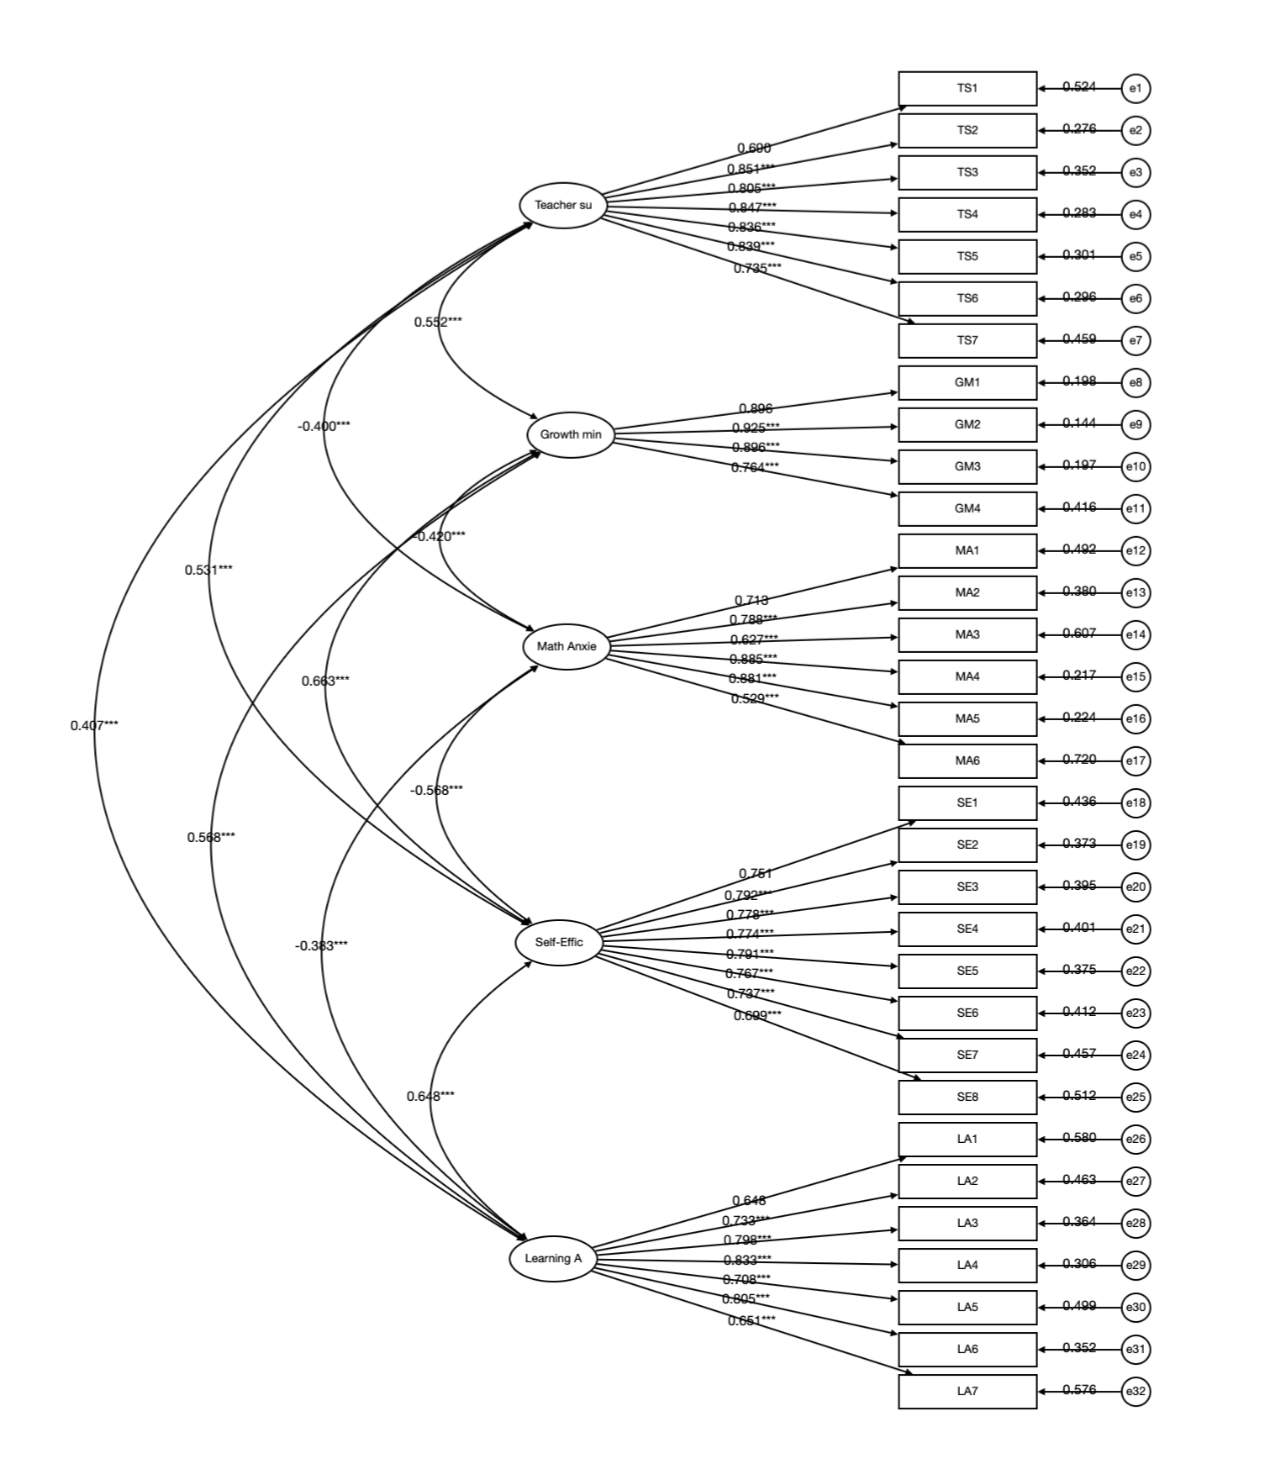


Mplus Syntax for Multi-Group Analysis

Measurement Invariance Testing (Multi-Group Confirmatory Factor Analysis)

| mplus TITLE: Multi-Group CFA Measurement Invariance Testing (Configural, Metric, Scalar); DATA: FILE IS data.dat; ! Data file VARIABLE:   NAMES = TS1-TS8 GM1-GM4 MAn1-MAn6 SE1-SE8 LA1-LA7 SC group;  USEVARIABLES = TS1-TS8 GM1-GM4 MAn1-MAn6 SE1-SE8 LA1-LA7 SC;  GROUPING = group (1=Competitive 2=Regular); ! Grouping variable (1=Competitive students, 2=Regular students) ANALYSIS:  ESTIMATOR = MLR; ! Use MLR for Satorra-Bentler correction MODEL:  ! Configural invariance model: freely estimate factor loadings across groups  TS BY TS1-TS8;  GM BY GM1-GM4;  MAn BY MAn1-MAn6;  SE BY SE1-SE8;  LA BY LA1-LA7; MODEL group2:  TS BY TS1-TS8;  GM BY GM1-GM4;  MAn BY MAn1-MAn6;  SE BY SE1-SE8;  LA BY LA1-LA7; OUTPUT:   MODINDICES; ! Optional: Examine model fit indices and modification indices |
| --- |

Metric Invariance Testing: Constrain Factor Loadings to Be Equal Across Groups

| mplus TITLE: Multi-Group CFA - Metric Invariance; DATA: FILE IS data.dat; VARIABLE:   NAMES = TS1-TS8 GM1-GM4 MAn1-MAn6 SE1-SE8 LA1-LA7 SC group;  USEVARIABLES = TS1-TS8 GM1-GM4 MAn1-MAn6 SE1-SE8 LA1-LA7 SC;  GROUPING = group (1=Competitive 2=Regular); ANALYSIS: ESTIMATOR = MLR; MODEL:  ! Factor loadings for Group 1 (Competitive students), labeled p1–p33  TS BY TS1 (p1) TS2 (p2) TS3 (p3) TS4 (p4) TS5 (p5) TS6 (p6) TS7 (p7) TS8 (p8);  GM BY GM1 (p9) GM2 (p10) GM3 (p11) GM4 (p12);  MAn BY MAn1 (p13) MAn2 (p14) MAn3 (p15) MAn4 (p16) MAn5 (p17) MAn6 (p18);  SE BY SE1 (p19) SE2 (p20) SE3 (p21) SE4 (p22) SE5 (p23) SE6 (p24) SE7 (p25) SE8 (p26);  LA BY LA1 (p27) LA2 (p28) LA3 (p29) LA4 (p30) LA5 (p31) LA6 (p32) LA7 (p33); MODEL group2:  ! Factor loadings for Group 2 (Regular students), use identical labels to enforce equality constraints  TS BY TS1 (p1) TS2 (p2) TS3 (p3) TS4 (p4) TS5 (p5) TS6 (p6) TS7 (p7) TS8 (p8);  GM BY GM1 (p9) GM2 (p10) GM3 (p11) GM4 (p12);  MAn BY MAn1 (p13) MAn2 (p14) MAn3 (p15) MAn4 (p16) MAn5 (p17) MAn6 (p18);  SE BY SE1 (p19) SE2 (p20) SE3 (p21) SE4 (p22) SE5 (p23) SE6 (p24) SE7 (p25) SE8 (p26);  LA BY LA1 (p27) LA2 (p28) LA3 (p29) LA4 (p30) LA5 (p31) LA6 (p32) LA7 (p33); OUTPUT:   TECH1 TECH4 STANDARDIZED; ! Examine factor loadings and model fit indices |
| --- |

Scalar Invariance Testing: Further Constrain Intercepts to Be Equal (Building on Metric Invariance)

| mplus TITLE: Multi-Group CFA - Scalar Invariance; DATA: FILE IS data.dat; VARIABLE:   NAMES = TS1-TS8 GM1-GM4 MAn1-MAn6 SE1-SE8 LA1-LA7 SC group;  USEVARIABLES = TS1-TS8 GM1-GM4 MAn1-MAn6 SE1-SE8 LA1-LA7 SC;  GROUPING = group (1=Competitive 2=Regular); ANALYSIS: ESTIMATOR = MLR; MODEL:  ! Factor loadings (same as metric invariance model)  TS BY TS1 (p1) TS2 (p2) TS3 (p3) TS4 (p4) TS5 (p5) TS6 (p6) TS7 (p7) TS8 (p8);  GM BY GM1 (p9) GM2 (p10) GM3 (p11) GM4 (p12);  MAn BY MAn1 (p13) MAn2 (p14) MAn3 (p15) MAn4 (p16) MAn5 (p17) MAn6 (p18);  SE BY SE1 (p19) SE2 (p20) SE3 (p21) SE4 (p22) SE5 (p23) SE6 (p24) SE7 (p25) SE8 (p26);  LA BY LA1 (p27) LA2 (p28) LA3 (p29) LA4 (p30) LA5 (p31) LA6 (p32) LA7 (p33);  ! Constrain intercepts of observed variables to be equal across groups, labeled i1–i33  [TS1] (i1); [TS2] (i2); [TS3] (i3); [TS4] (i4);  [TS5] (i5); [TS6] (i6); [TS7] (i7); [TS8] (i8);  [GM1] (i9); [GM2] (i10);[GM3] (i11);[GM4] (i12);  [MAn1] (i13);[MAn2] (i14);[MAn3] (i15);[MAn4] (i16);[MAn5] (i17);[MAn6] (i18);  [SE1] (i19);[SE2] (i20);[SE3] (i21);[SE4] (i22);  [SE5] (i23);[SE6] (i24);[SE7] (i25);[SE8] (i26);  [LA1] (i27);[LA2] (i28);[LA3] (i29);[LA4] (i30);  [LA5] (i31);[LA6] (i32);[LA7] (i33); MODEL group2:  ! Factor loadings and intercepts for Group 2, use identical labels  TS BY TS1 (p1) TS2 (p2) TS3 (p3) TS4 (p4) TS5 (p5) TS6 (p6) TS7 (p7) TS8 (p8);  GM BY GM1 (p9) GM2 (p10) GM3 (p11) GM4 (p12);  MAn BY MAn1 (p13) MAn2 (p14) MAn3 (p15) MAn4 (p16) MAn5 (p17) MAn6 (p18);  SE BY SE1 (p19) SE2 (p20) SE3 (p21) SE4 (p22) SE5 (p23) SE6 (p24) SE7 (p25) SE8 (p26);  LA BY LA1 (p27) LA2 (p28) LA3 (p29) LA4 (p30) LA5 (p31) LA6 (p32) LA7 (p33);  [TS1] (i1); [TS2] (i2); [TS3] (i3); [TS4] (i4);  [TS5] (i5); [TS6] (i6); [TS7] (i7); [TS8] (i8);  [GM1] (i9); [GM2] (i10);[GM3] (i11);[GM4] (i12);  [MAn1] (i13);[MAn2] (i14);[MAn3] (i15);[MAn4] (i16);[MAn5] (i17);[MAn6] (i18);  [SE1] (i19);[SE2] (i20);[SE3] (i21);[SE4] (i22);  [SE5] (i23);[SE6] (i24);[SE7] (i25);[SE8] (i26);  [LA1] (i27);[LA2] (i28);[LA3] (i29);[LA4] (i30);  [LA5] (i31);[LA6] (i32);[LA7] (i33); OUTPUT:   TECH1 TECH4 STANDARDIZED CINTERVAL;   ! Output intercepts, factor loadings, and fit differences including ΔCFI |
| --- |

Multi-Group Structural Equation Modeling and Path Coefficient Difference Testing

| mplus !----------------------------- TITLE: Multi-Group Structural Equation Model and Path Coefficient Difference Testing; DATA: FILE IS data.dat; VARIABLE:  NAMES = TS1-TS8 GM1-GM4 MAn1-MAn6 SE1-SE8 LA1-LA7 SC group;  USEVARIABLES = TS1-TS8 GM1-GM4 MAn1-MAn6 SE1-SE8 LA1-LA7 SC;  GROUPING = group (1=Competitive 2=Regular); ANALYSIS:   ESTIMATOR = MLR; MODEL:  ! Specify structural equation model with all explicit paths, freely estimated across groups initially  TS BY TS1-TS8;  GM BY GM1-GM4;  MAn BY MAn1-MAn6;  SE BY SE1-SE8;  LA BY LA1-LA7;  ! Structural relationships  GM ON TS (a1); ! Teacher Support -> Growth Mindset  LA ON GM (b1); ! Growth Mindset -> Learning Attitude  MAn ON GM (b2); ! Growth Mindset -> Math Anxiety  SE ON GM (b3); ! Growth Mindset -> Self-Efficacy  SC ON LA (c1) MAn (c2) SE (c3) GM (c4);   ! Learning Attitude, Math Anxiety, Self-Efficacy, Growth Mindset -> Math Achievement MODEL group2:  TS BY TS1-TS8;  GM BY GM1-GM4;  MAn BY MAn1-MAn6;  SE BY SE1-SE8;  LA BY LA1-LA7;  GM ON TS (a4);  LA ON GM (b4);  MAn ON GM (b5);  SE ON GM (b6);  SC ON LA (c5) MAn (c6) SE (c7) GM (c8); OUTPUT:  STANDARDIZED TECH1; |
| --- |

**Introduce Path Equality Constraints and Perform Difference Testing (Wald Test)**

| mplus TITLE: Path Coefficient Equality Constraint Difference Testing; DATA: FILE IS data.dat; VARIABLE:  NAMES = TS1-TS8 GM1-GM4 MAn1-MAn6 SE1-SE8 LA1-LA7 SC group;  USEVARIABLES = TS1-TS8 GM1-GM4 MAn1-MAn6 SE1-SE8 LA1-LA7 SC;  GROUPING = group (1=Competitive 2=Regular); ANALYSIS: ESTIMATOR = MLR; MODEL:  TS BY TS1-TS8;  GM BY GM1-GM4;  MAn BY MAn1-MAn6;  SE BY SE1-SE8;  LA BY LA1-LA7;  ! Constrain paths to be equal (test differences one by one as needed)  GM ON TS (a);   LA ON GM (b);  MAn ON GM (d);  SE ON GM (e);  SC ON LA (f) MAn (g) SE (h) GM (c); MODEL group2:  TS BY TS1-TS8;  GM BY GM1-GM4;  MAn BY MAn1-MAn6;  SE BY SE1-SE8;  LA BY LA1-LA7;  GM ON TS (a);   LA ON GM (b);  MAn ON GM (d);  SE ON GM (e);  SC ON LA (f) MAn (g) SE (h) GM (c); MODEL TEST:  ! Test differences in path coefficients between the two groups  0 = a - a; ! TS->GM (no change, typically zero difference)  0 = b - b; ! GM->LA  0 = d - d; ! GM->MAn  0 = e - e; ! GM->SE  0 = f - f; ! LA->SC  0 = g - g; ! MAn->SC  0 = h - h; ! SE->SC  0 = c - c; ! GM->SC OUTPUT:  SAMPSTAT; |
| --- |

**Bootstrap Mediation Effect Testing and Cross-Group Effect Difference Testing**

| mplus TITLE: Bootstrap Mediation Effects and Cross-Group Effect Difference Testing; DATA: FILE IS data.dat; VARIABLE:  NAMES = TS1-TS8 GM1-GM4 MAn1-MAn6 SE1-SE8 LA1-LA7 SC group;  USEVARIABLES = TS1-TS8 GM1-GM4 MAn1-MAn6 SE1-SE8 LA1-LA7 SC;  GROUPING = group (1=Competitive 2=Regular); ANALYSIS:  ESTIMATOR = MLR;  BOOTSTRAP = 5000; ! Number of bootstrap resamples MODEL:  ! Measurement model (consistent with previous models)  TS BY TS1-TS8;  GM BY GM1-GM4;  MAn BY MAn1-MAn6;  SE BY SE1-SE8;  LA BY LA1-LA7;  ! Structural paths (estimated separately for each group)  MODEL group1:  GM ON TS (a1);  LA ON GM (b1);  MAn ON GM (b2);  SE ON GM (b3);  SC ON LA (c1) MAn (c2) SE (c3) GM (c4);  MODEL group2:  GM ON TS (a4);  LA ON GM (b4);  MAn ON GM (b5);  SE ON GM (b6);  SC ON LA (c5) MAn (c6) SE (c7) GM (c8); MODEL INDIRECT:  ! Define indirect effect paths: independent variable -> mediator(s) -> outcome  GM IND LA SC; ! GM -> LA -> SC  GM IND MAn SC; ! GM -> MAn -> SC  GM IND SE SC; ! GM -> SE -> SC  TS IND GM LA SC; ! TS -> GM -> LA -> SC  TS IND GM MAn SC; ! TS -> GM -> MAn -> SC  TS IND GM SE SC; ! TS -> GM -> SE -> SC MODEL CONSTRAINT:  NEW(GM_LA1 GM_MAn1 GM_SE1 TS_GM_LA1 TS_GM_MAn1 TS_GM_SE1  GM_LA2 GM_MAn2 GM_SE2 TS_GM_LA2 TS_GM_MAn2 TS_GM_SE2  diff_GM_LA diff_GM_MAn diff_GM_SE diff_TS_GM_LA diff_TS_GM_MAn diff_TS_GM_SE);  ! Calculate mediation path effects (Group 1 and Group 2)  GM_LA1 = b1 * c1; ! Group 1: GM->LA->SC  GM_MAn1 = b2 * c2; ! Group 1: GM->MAn->SC  GM_SE1 = b3 * c3; ! Group 1: GM->SE->SC  TS_GM_LA1 = a1 * b1 * c1; ! Group 1: TS->GM->LA->SC  TS_GM_MAn1 = a1 * b2 * c2; ! Group 1: TS->GM->MAn->SC  TS_GM_SE1 = a1 * b3 * c3; ! Group 1: TS->GM->SE->SC   GM_LA2 = b4 * c5; ! Group 2: GM->LA->SC  GM_MAn2 = b5 * c6; ! Group 2: GM->MAn->SC  GM_SE2 = b6 * c7; ! Group 2: GM->SE->SC  TS_GM_LA2 = a4 * b4 * c5; ! Group 2: TS->GM->LA->SC  TS_GM_MAn2 = a4 * b5 * c6; ! Group 2: TS->GM->MAn->SC  TS_GM_SE2 = a4 * b6 * c7; ! Group 2: TS->GM->SE->SC   ! Calculate effect differences between the two groups  diff_GM_LA = GM_LA1 - GM_LA2;  diff_GM_MAn = GM_MAn1 - GM_MAn2;  diff_GM_SE = GM_SE1 - GM_SE2;  diff_TS_GM_LA = TS_GM_LA1 - TS_GM_LA2;  diff_TS_GM_MAn= TS_GM_MAn1 - TS_GM_MAn2;  diff_TS_GM_SE = TS_GM_SE1 - TS_GM_SE2; OUTPUT:  CINTERVAL(BCBOOTSTRAP) STANDARDIZED;   ! Output bias-corrected bootstrap confidence intervals and standardized effects |
| --- |
