# Supplementary material
Source: Research Square preprint supplement (doi:10.21203/rs.3.rs-9700335/v1)
Supplement: Supplementary file 5 [file b10c404281049e229094f78d.xlsx]

## Sheet: ZS
Teacher Support 1	Teacher Support 2	Teacher Support 3	Teacher Support 4	Teacher Support 5	Teacher Support 6	Teacher Support 7	Growth Mindset 1	Growth Mindset 2	Growth Mindset 3	Growth Mindset 4	Learning Attitude 1	Learning Attitude 2	Learning Attitude 3	Learning Attitude 4	Learning Attitude 5	Learning Attitude 6	Learning Attitude 7	Math Anxiety 1	Math Anxiety 2	Math Anxiety 3	Math Anxiety 4	Math Anxiety 5	Math Anxiety 6	Self-Efficacy 1	Self-Efficacy 2	Self-Efficacy 3	Self-Efficacy 4	Self-Efficacy 5	Self-Efficacy 6	Self-Efficacy 7	Self-Efficacy 8	Academic Achievement	Group
0.6905	0.46923	0.30338	0.15346	0.25644	0.33157	0.08556	-0.00327	-0.07949	-0.01245	-0.7206	0.95566	-0.48695	0.04834	0.14444	1.25647	0.18965	0.26623	-0.46454	-0.81936	-0.5618	-0.9102	-0.85556	-1.52925	0.99426	-0.40505	0.56173	0.57983	0.24604	-0.38991	0.28598	0.24656		1
0.6905	-0.37033	-0.52288	-0.72756	-0.58917	-0.51108	0.08556	0.86755	0.83983	0.89081	0.97568	0.11206	-0.48695	0.88693	-1.4564	1.25647	-0.6465	-0.50075	-1.1523	-0.81936	-0.5618	-0.18675	-0.85556	-1.52925	0.99426	1.18722	1.36363	0.57983	0.24604	0.41202	0.28598	-1.3596		1
0.6905	0.46923	0.30338	0.15346	0.25644	1.17422	0.97232	0.86755	0.83983	0.89081	0.97568	0.95566	1.11878	0.88693	0.94485	1.25647	1.02581	0.26623	0.22322	-0.04922	-1.18017	-0.18675	-0.85556	-1.52925	0.99426	0.39108	0.56173	0.57983	1.08151	1.21394	0.28598	-0.55652		1
-0.1381	-0.37033	1.12963	1.03449	1.10204	1.17422	0.08556	0.86755	0.83983	0.89081	0.97568	0.95566	1.11878	0.88693	0.94485	1.25647	1.02581	1.03321	-1.1523	-0.81936	-1.18017	-0.9102	-0.85556	-1.52925	0.99426	-0.40505	1.36363	1.39734	1.08151	1.21394	1.10103	1.04964		1
-1.7953	-1.20989	-0.52288	-0.72756	-0.58917	-0.51108	-0.80119	0.86755	0.83983	-0.91572	-0.7206	0.95566	1.11878	0.04834	-0.65598	-0.26502	0.18965	0.26623	-1.1523	-0.81936	-1.18017	-0.18675	-0.13915	-1.52925	-0.63661	0.39108	0.56173	1.39734	1.08151	1.21394	0.28598	1.04964		1
-0.1381	-0.37033	1.12963	1.03449	1.10204	0.33157	0.97232	-0.00327	-0.07949	-0.91572	0.12754	0.11206	-0.48695	0.88693	0.94485	0.49572	1.02581	0.26623	-0.46454	-0.81936	-1.18017	-0.9102	-0.85556	-1.52925	0.99426	1.18722	1.36363	0.57983	1.08151	1.21394	0.28598	1.04964		1
1.5191	1.30878	1.12963	1.03449	1.10204	1.17422	0.97232	0.86755	0.83983	0.89081	0.97568	0.95566	1.11878	0.88693	0.94485	1.25647	1.02581	1.03321	-1.1523	-0.81936	-1.18017	-0.9102	-0.85556	-1.52925	0.99426	1.18722	0.56173	1.39734	1.08151	1.21394	1.10103	1.04964		1
-0.9667	-1.20989	-1.34914	0.15346	-1.43477	-1.35373	-0.80119	-0.8741	-0.99881	-0.91572	-2.41688	0.95566	1.11878	0.88693	0.94485	1.25647	1.02581	1.03321	-0.46454	-0.81936	-1.18017	-0.9102	-0.85556	-0.88663	0.99426	0.39108	1.36363	-0.23767	0.24604	1.21394	-1.34411	-0.55652		1
-0.1381	-0.37033	1.12963	1.03449	-0.58917	-0.51108	0.08556	-0.00327	-0.07949	-0.01245	0.12754	0.95566	1.11878	0.88693	0.94485	1.25647	1.02581	1.03321	-1.1523	-0.81936	-1.18017	-0.9102	-0.85556	-0.244	0.17882	0.39108	-0.24017	-0.23767	0.24604	-1.19183	0.28598	1.04964		1
0.6905	0.46923	0.30338	1.03449	1.10204	1.17422	0.97232	0.86755	0.83983	0.89081	0.97568	0.95566	1.11878	0.88693	0.94485	0.49572	1.02581	1.03321	-1.1523	-0.81936	-1.18017	-0.18675	-0.85556	-0.88663	0.99426	1.18722	0.56173	1.39734	1.08151	1.21394	1.10103	1.04964		1
-0.9667	-1.20989	1.12963	-0.72756	-1.43477	-1.35373	-1.68794	-1.74492	0.83983	0.89081	0.97568	0.11206	1.11878	-0.79025	-0.65598	1.25647	0.18965	0.26623	-0.46454	-0.04922	-0.5618	-0.18675	-0.13915	1.04124	-1.45204	-1.20118	-1.04207	-1.05518	1.08151	0.41202	0.28598	-0.55652		1
-0.9667	-1.20989	-0.52288	0.15346	-0.58917	-1.35373	-0.80119	-0.00327	0.83983	-0.91572	-1.56874	-0.73154	-0.48695	0.88693	0.94485	-0.26502	0.18965	0.26623	-1.1523	-0.04922	-1.18017	-0.18675	-0.13915	-1.52925	-0.63661	0.39108	0.56173	-0.23767	0.24604	1.21394	-0.52907	0.24656		1
-0.1381	-0.37033	-1.34914	1.03449	0.25644	0.33157	-0.80119	0.86755	0.83983	0.89081	0.97568	0.95566	1.11878	0.88693	0.94485	0.49572	1.02581	1.03321	-1.1523	-0.81936	-0.5618	-0.9102	-0.85556	-1.52925	0.99426	1.18722	1.36363	1.39734	1.08151	-1.99375	1.10103	1.04964		1
0.6905	0.46923	0.30338	0.15346	0.25644	0.33157	0.08556	-0.00327	-0.07949	-0.01245	0.12754	0.95566	0.31591	0.88693	0.94485	0.49572	1.02581	1.03321	-1.1523	-0.81936	0.05657	-0.18675	-0.13915	-0.88663	0.17882	0.39108	-0.24017	-0.23767	0.24604	1.21394	1.10103	1.04964		1
-0.9667	-0.37033	-0.52288	1.03449	0.25644	1.17422	0.97232	-0.8741	-0.99881	-0.91572	-0.7206	0.95566	1.11878	0.04834	0.14444	0.49572	0.18965	-0.50075	0.22322	-0.81936	-0.5618	1.98358	0.57725	-0.88663	0.99426	0.39108	1.36363	-0.23767	0.24604	0.41202	0.28598	0.24656		1
0.6905	0.46923	0.30338	0.15346	0.25644	0.33157	0.08556	-0.00327	-0.07949	-0.01245	-0.7206	0.11206	0.31591	0.04834	0.14444	-0.26502	0.18965	0.26623	0.22322	-0.04922	-0.5618	0.53669	-0.13915	-0.88663	-0.63661	-0.40505	-0.24017	1.39734	1.08151	-0.38991	-0.52907	-0.55652		1
-0.1381	-0.37033	0.30338	-0.72756	-0.58917	-0.51108	0.97232	0.86755	-0.99881	-0.91572	-0.7206	-0.73154	1.11878	-0.79025	-0.65598	-0.26502	1.02581	1.03321	-1.1523	-0.81936	-0.5618	0.53669	-0.13915	-0.88663	0.17882	-0.40505	-0.24017	-1.05518	0.24604	0.41202	-0.52907	1.04964		1
1.5191	1.30878	1.12963	1.03449	1.10204	1.17422	0.97232	0.86755	0.83983	0.89081	0.97568	0.95566	1.11878	0.88693	0.94485	1.25647	1.02581	1.03321	-1.1523	-0.81936	-1.18017	-0.9102	-0.85556	-1.52925	0.99426	1.18722	1.36363	1.39734	-0.58944	1.21394	1.10103	0.24656		1
1.5191	1.30878	1.12963	1.03449	1.10204	1.17422	0.97232	0.86755	0.83983	0.89081	0.97568	0.95566	1.11878	0.88693	0.94485	1.25647	1.02581	1.03321	0.22322	-0.81936	-1.18017	-0.9102	-0.85556	-0.88663	0.17882	1.18722	1.36363	1.39734	1.08151	1.21394	1.10103	1.04964		1
-0.1381	-0.37033	0.30338	0.15346	0.25644	0.33157	0.97232	0.86755	0.83983	-0.01245	0.12754	0.11206	1.11878	0.88693	0.94485	1.25647	0.18965	0.26623	0.22322	0.72092	-0.5618	-0.18675	-0.13915	-0.88663	0.99426	1.18722	1.36363	1.39734	1.08151	-0.38991	1.10103	0.24656		1
-0.1381	-0.37033	-1.34914	-0.72756	-1.43477	-1.35373	-1.68794	-1.74492	-0.99881	-2.72225	-1.56874	-0.73154	-0.48695	0.88693	0.94485	1.25647	0.18965	-0.50075	0.22322	-0.81936	-0.5618	1.26013	0.57725	-0.88663	-0.63661	0.39108	0.56173	-1.05518	-1.42492	0.41202	0.28598	-1.3596		1
-1.7953	-0.37033	0.30338	-0.72756	-0.58917	-2.19638	-0.80119	-2.61574	0.83983	-2.72225	-2.41688	0.95566	1.11878	0.88693	0.94485	1.25647	1.02581	1.03321	-1.1523	-0.81936	-1.18017	-0.9102	-0.85556	-1.52925	0.99426	0.39108	1.36363	1.39734	0.24604	1.21394	1.10103	1.04964		1
0.6905	0.46923	0.30338	0.15346	0.25644	0.33157	0.97232	0.86755	0.83983	0.89081	0.97568	0.95566	1.11878	0.88693	0.94485	-0.26502	1.02581	1.03321	-0.46454	-0.81936	-0.5618	-0.9102	-0.85556	-0.88663	0.17882	-1.20118	0.56173	-0.23767	1.08151	0.41202	1.10103	1.04964		1
-0.9667	-1.20989	-1.34914	-1.60859	-1.43477	-1.35373	-0.80119	-1.74492	-1.91812	-1.81898	-1.56874	0.95566	1.11878	-0.79025	0.94485	1.25647	0.18965	-0.50075	0.22322	0.72092	-0.5618	1.26013	-0.13915	-0.88663	0.99426	1.18722	1.36363	0.57983	-0.58944	0.41202	0.28598	-1.3596		1
0.6905	-0.37033	-0.52288	0.15346	0.25644	0.33157	-1.68794	-0.00327	-0.07949	-1.81898	-2.41688	0.95566	1.11878	0.04834	0.14444	1.25647	-0.6465	-0.50075	0.22322	-0.04922	-0.5618	-0.9102	-0.13915	-0.88663	0.17882	0.39108	0.56173	0.57983	0.24604	0.41202	0.28598	-1.3596		1
0.6905	0.46923	1.12963	1.03449	0.25644	0.33157	0.97232	0.86755	0.83983	0.89081	0.97568	0.95566	1.11878	0.88693	0.94485	1.25647	1.02581	1.03321	-1.1523	-0.81936	-0.5618	-0.9102	-0.85556	-0.88663	0.99426	1.18722	1.36363	1.39734	1.08151	0.41202	1.10103	1.04964		1
-0.1381	-0.37033	0.30338	0.15346	-0.58917	-0.51108	-0.80119	-0.8741	-0.07949	-0.91572	-0.7206	0.11206	-0.48695	0.88693	0.14444	-0.26502	0.18965	1.03321	0.22322	-0.81936	0.05657	-0.9102	-0.85556	-1.52925	0.17882	-0.40505	-0.24017	-0.23767	0.24604	0.41202	0.28598	0.24656		1
1.5191	1.30878	1.12963	1.03449	1.10204	1.17422	0.97232	0.86755	0.83983	0.89081	0.97568	0.95566	1.11878	0.88693	0.94485	1.25647	1.02581	1.03321	-1.1523	-0.81936	-1.18017	-0.9102	-0.85556	-1.52925	0.99426	1.18722	-0.24017	1.39734	1.08151	1.21394	1.10103	1.04964		1
0.6905	1.30878	1.12963	1.03449	1.10204	1.17422	0.97232	0.86755	0.83983	0.89081	0.97568	0.95566	1.11878	0.88693	0.94485	1.25647	1.02581	1.03321	-1.1523	-0.81936	-1.18017	-0.9102	-0.85556	-0.244	0.99426	0.39108	1.36363	1.39734	1.08151	-0.38991	1.10103	0.24656		1
1.5191	1.30878	1.12963	1.03449	1.10204	1.17422	0.97232	0.86755	0.83983	0.89081	0.97568	0.95566	1.11878	0.88693	0.94485	1.25647	1.02581	1.03321	-1.1523	-0.81936	-1.18017	-0.9102	-0.85556	-1.52925	0.99426	1.18722	1.36363	1.39734	1.08151	1.21394	1.10103	1.04964		1
-0.9667	-1.20989	-0.52288	0.15346	0.25644	0.33157	0.08556	0.86755	0.83983	0.89081	0.97568	-0.73154	-0.48695	-0.79025	-0.65598	-1.02576	-0.6465	-0.50075	-0.46454	-0.04922	-0.5618	-0.18675	-0.13915	-0.88663	0.17882	-0.40505	-1.04207	-0.23767	-0.58944	-0.38991	0.28598	0.24656		1
0.6905	0.46923	0.30338	0.15346	0.25644	0.33157	0.08556	-0.00327	0.83983	-0.01245	0.12754	0.11206	0.31591	-0.79025	-0.65598	-0.26502	0.18965	0.26623	0.22322	-0.04922	0.05657	-0.18675	-0.13915	-1.52925	0.17882	-0.40505	-0.24017	-0.23767	0.24604	0.41202	0.28598	0.24656		1
0.6905	-0.37033	-1.34914	0.15346	-0.58917	0.33157	-0.80119	0.86755	0.83983	0.89081	0.97568	0.95566	1.11878	0.88693	0.94485	1.25647	1.02581	1.03321	0.91098	-0.04922	-0.5618	-0.9102	-0.85556	-1.52925	0.99426	0.39108	0.56173	1.39734	1.08151	-0.38991	-0.52907	1.04964		1
-0.1381	-0.37033	-2.1754	-1.60859	-1.43477	-2.19638	0.08556	0.86755	0.83983	-0.01245	-1.56874	0.95566	1.11878	0.88693	0.94485	1.25647	1.02581	1.03321	-1.1523	-0.81936	-1.18017	-0.9102	-0.85556	-1.52925	0.99426	1.18722	1.36363	0.57983	1.08151	1.21394	-1.34411	1.04964		1
-0.1381	-0.37033	-0.52288	-0.72756	-0.58917	-0.51108	-0.80119	0.86755	0.83983	0.89081	0.97568	0.95566	1.11878	0.88693	0.94485	1.25647	1.02581	1.03321	1.59874	2.26121	0.67494	0.53669	0.57725	-1.52925	0.99426	1.18722	-0.24017	1.39734	0.24604	1.21394	1.10103	0.24656		1
-0.1381	-0.37033	-1.34914	-0.72756	-1.43477	-1.35373	-0.80119	-2.61574	-1.91812	-1.81898	-0.7206	-0.73154	-1.28981	-0.79025	-1.4564	-1.02576	-1.48266	-0.50075	0.22322	-0.04922	-0.5618	0.53669	-0.13915	-1.52925	-0.63661	-1.20118	-0.24017	0.57983	-0.58944	-0.38991	-1.34411	-0.55652		1
0.6905	0.46923	0.30338	0.15346	0.25644	0.33157	0.08556	0.86755	0.83983	0.89081	0.12754	0.95566	0.31591	0.04834	0.14444	1.25647	0.18965	1.03321	-1.1523	-0.81936	-1.18017	-0.9102	-0.85556	-1.52925	0.99426	0.39108	1.36363	1.39734	1.08151	1.21394	1.10103	1.04964		1
-0.1381	-2.04944	-0.52288	-0.72756	-2.28038	-1.35373	0.08556	-0.8741	-0.99881	-0.91572	-0.7206	0.95566	1.11878	0.88693	0.94485	1.25647	1.02581	1.03321	-1.1523	-0.81936	-1.18017	-0.9102	-0.85556	-1.52925	0.99426	-0.40505	1.36363	1.39734	1.08151	1.21394	-1.34411	0.24656		1
-0.1381	0.46923	0.30338	0.15346	0.25644	0.33157	0.08556	-0.00327	-0.99881	-0.01245	-0.7206	0.11206	-1.28981	-0.79025	-0.65598	-0.26502	-0.6465	-0.50075	-0.46454	-0.04922	-1.18017	-0.18675	-0.13915	-1.52925	-0.63661	-0.40505	-0.24017	-0.23767	0.24604	0.41202	-0.52907	0.24656		1
1.5191	1.30878	1.12963	1.03449	1.10204	1.17422	0.97232	0.86755	0.83983	0.89081	0.97568	0.95566	1.11878	0.88693	0.94485	1.25647	1.02581	1.03321	0.22322	-0.81936	-1.18017	-0.9102	-0.85556	-1.52925	0.99426	1.18722	1.36363	-0.23767	1.08151	0.41202	-0.52907	-0.55652		1
-0.9667	-0.37033	-0.52288	-0.72756	-0.58917	-0.51108	-0.80119	0.86755	-0.07949	-0.01245	-0.7206	0.95566	1.11878	0.88693	0.94485	-0.26502	-0.6465	0.26623	0.22322	-0.04922	-0.5618	0.53669	0.57725	-1.52925	-1.45204	-1.20118	-0.24017	-1.05518	0.24604	-0.38991	-0.52907	-0.55652		1
0.6905	1.30878	1.12963	1.03449	-0.58917	1.17422	0.97232	0.86755	0.83983	0.89081	0.97568	0.95566	1.11878	0.88693	0.94485	1.25647	1.02581	1.03321	-1.1523	-0.81936	-1.18017	-0.9102	-0.85556	-1.52925	0.99426	1.18722	1.36363	1.39734	1.08151	0.41202	1.10103	1.04964		1
-0.9667	-1.20989	1.12963	1.03449	1.10204	0.33157	0.08556	-0.8741	-0.07949	-0.91572	-0.7206	0.95566	0.31591	0.88693	-0.65598	0.49572	-0.6465	-0.50075	-0.46454	-0.81936	-0.5618	-0.9102	-0.85556	0.39862	0.99426	0.39108	1.36363	1.39734	1.08151	1.21394	1.10103	1.04964		1
-0.9667	-1.20989	0.30338	0.15346	-1.43477	-0.51108	-1.68794	-0.00327	-0.07949	-0.01245	0.12754	-0.73154	-0.48695	0.88693	0.94485	1.25647	-0.6465	-2.03471	-0.46454	-0.81936	-0.5618	-0.18675	-0.13915	0.39862	-0.63661	0.39108	0.56173	0.57983	-1.42492	0.41202	-1.34411	0.24656		1
0.6905	0.46923	1.12963	1.03449	0.25644	1.17422	0.97232	0.86755	0.83983	0.89081	0.97568	0.95566	1.11878	0.88693	0.94485	1.25647	1.02581	1.03321	-1.1523	-0.81936	-0.5618	-0.9102	-0.85556	-1.52925	0.99426	1.18722	1.36363	1.39734	1.08151	1.21394	1.10103	1.04964		1
1.5191	1.30878	1.12963	1.03449	1.10204	1.17422	0.97232	0.86755	0.83983	0.89081	0.97568	0.95566	1.11878	0.88693	0.94485	1.25647	1.02581	1.03321	-1.1523	-0.81936	-1.18017	-0.9102	-0.85556	-1.52925	0.99426	1.18722	1.36363	1.39734	1.08151	1.21394	1.10103	1.04964		1
-0.9667	0.46923	1.12963	1.03449	-2.28038	1.17422	0.97232	0.86755	0.83983	-2.72225	-2.41688	-0.73154	1.11878	0.88693	0.94485	1.25647	1.02581	1.03321	-1.1523	-0.81936	-1.18017	-0.9102	-0.85556	1.04124	0.99426	1.18722	1.36363	1.39734	1.08151	1.21394	1.10103	1.04964		1
0.6905	0.46923	0.30338	0.15346	0.25644	0.33157	0.08556	-0.00327	-0.07949	-0.01245	0.12754	0.11206	0.31591	-0.79025	-0.65598	-0.26502	-0.6465	-0.50075	-1.1523	-0.81936	-1.18017	-0.9102	-0.85556	-1.52925	0.99426	1.18722	1.36363	1.39734	1.08151	0.41202	1.10103	1.04964		1
-0.9667	-1.20989	-0.52288	0.15346	-0.58917	0.33157	0.08556	-0.00327	-0.07949	-0.01245	0.12754	0.11206	-0.48695	0.04834	0.14444	-0.26502	0.18965	0.26623	0.91098	-0.04922	-0.5618	-0.18675	-0.13915	0.39862	0.17882	-0.40505	-0.24017	-0.23767	0.24604	0.41202	0.28598	0.24656		1
-0.1381	-1.20989	1.12963	1.03449	1.10204	1.17422	0.97232	0.86755	0.83983	0.89081	0.97568	0.95566	1.11878	0.88693	0.94485	1.25647	1.02581	1.03321	-1.1523	-0.81936	-1.18017	-0.9102	-0.85556	-1.52925	0.99426	1.18722	1.36363	1.39734	1.08151	1.21394	1.10103	1.04964		1
0.6905	0.46923	0.30338	1.03449	0.25644	0.33157	-0.80119	-0.00327	-0.07949	-0.01245	-2.41688	-0.73154	-1.28981	0.04834	0.14444	-0.26502	-0.6465	-0.50075	-1.1523	-0.81936	-1.18017	-0.9102	-0.85556	-0.244	-0.63661	-1.20118	-1.04207	-0.23767	-0.58944	-0.38991	0.28598	-0.55652		1
0.6905	0.46923	0.30338	0.15346	0.25644	0.33157	0.08556	0.86755	-1.91812	-0.01245	0.12754	0.95566	1.11878	0.88693	0.94485	1.25647	0.18965	0.26623	1.59874	-0.04922	-0.5618	-0.18675	-0.13915	-0.88663	0.99426	-0.40505	-0.24017	-0.23767	0.24604	-1.19183	1.10103	1.04964		1
-0.1381	-0.37033	-0.52288	-0.72756	-0.58917	0.33157	-0.80119	-0.8741	-0.07949	-0.01245	-0.7206	0.95566	-0.48695	0.88693	0.94485	1.25647	1.02581	1.03321	0.91098	-0.81936	0.05657	0.53669	0.57725	-0.88663	0.99426	0.39108	-0.24017	1.39734	1.08151	-0.38991	-0.52907	1.04964		1
-0.1381	-0.37033	-0.52288	0.15346	-1.43477	-0.51108	-0.80119	-0.8741	-0.99881	-0.91572	-0.7206	0.11206	-0.48695	0.04834	0.14444	-0.26502	-0.6465	-0.50075	-0.46454	-0.04922	1.2933	-0.18675	-0.85556	-0.244	0.17882	0.39108	0.56173	0.57983	-0.58944	-0.38991	0.28598	-0.55652		1
1.5191	1.30878	1.12963	1.03449	1.10204	1.17422	0.97232	0.86755	0.83983	0.89081	0.97568	0.95566	1.11878	0.88693	0.94485	0.49572	0.18965	1.03321	-1.1523	-0.81936	-1.18017	-0.9102	-0.85556	-1.52925	0.99426	1.18722	1.36363	1.39734	1.08151	1.21394	1.10103	1.04964		1
0.6905	0.46923	-0.52288	0.15346	1.10204	0.33157	0.08556	-0.00327	-0.07949	-0.01245	0.12754	0.11206	0.31591	0.04834	0.14444	0.49572	0.18965	0.26623	-1.1523	-0.81936	-1.18017	-0.9102	-0.85556	-0.244	0.99426	1.18722	-0.24017	0.57983	1.08151	0.41202	1.10103	0.24656		1
-0.9667	-0.37033	-1.34914	0.15346	-0.58917	-0.51108	-0.80119	0.86755	0.83983	0.89081	0.97568	0.95566	1.11878	0.88693	0.94485	1.25647	1.02581	1.03321	-1.1523	-0.81936	-1.18017	-0.9102	-0.85556	1.04124	0.99426	1.18722	1.36363	1.39734	1.08151	1.21394	1.10103	1.04964		1
-0.1381	-0.37033	-0.52288	-0.72756	-0.58917	1.17422	0.97232	0.86755	0.83983	0.89081	0.97568	0.95566	1.11878	0.88693	0.94485	1.25647	1.02581	1.03321	-1.1523	-0.81936	-1.18017	-0.9102	-0.85556	-0.88663	0.99426	1.18722	1.36363	1.39734	1.08151	0.41202	1.10103	1.04964		1
-0.1381	-0.37033	-0.52288	-0.72756	-0.58917	-0.51108	-0.80119	-0.00327	-0.07949	-0.01245	0.12754	0.11206	0.31591	0.04834	0.14444	0.49572	0.18965	0.26623	-0.46454	-0.04922	-0.5618	-0.18675	-0.13915	-0.88663	0.17882	0.39108	0.56173	0.57983	0.24604	0.41202	0.28598	0.24656		1
0.6905	0.46923	0.30338	0.15346	0.25644	0.33157	0.08556	0.86755	-0.07949	-0.01245	0.12754	0.11206	1.11878	0.88693	-0.65598	-0.26502	0.18965	-0.50075	-1.1523	-0.81936	0.05657	-0.9102	-0.13915	-0.88663	0.99426	0.39108	1.36363	0.57983	0.24604	1.21394	0.28598	0.24656		1
-0.1381	-0.37033	-0.52288	0.15346	0.25644	-0.51108	0.08556	-0.00327	-0.07949	-0.01245	0.12754	0.95566	1.11878	0.88693	0.94485	1.25647	1.02581	0.26623	-1.1523	-0.81936	-1.18017	-0.9102	-0.85556	-1.52925	0.17882	-1.20118	-0.24017	0.57983	0.24604	1.21394	-0.52907	0.24656		1
-0.9667	-0.37033	-0.52288	-0.72756	-0.58917	-0.51108	-0.80119	-0.8741	-0.99881	-0.91572	-0.7206	0.11206	0.31591	-0.79025	0.14444	-1.02576	-0.6465	1.03321	-1.1523	-0.81936	-1.18017	-0.9102	-0.85556	-1.52925	-0.63661	-0.40505	-0.24017	-1.05518	-0.58944	0.41202	-0.52907	1.04964		1
1.5191	1.30878	1.12963	1.03449	1.10204	1.17422	0.97232	0.86755	0.83983	0.89081	0.97568	0.95566	1.11878	-0.79025	-0.65598	1.25647	0.18965	0.26623	-1.1523	-0.81936	-1.18017	-0.9102	-0.85556	-1.52925	0.99426	1.18722	1.36363	1.39734	1.08151	1.21394	1.10103	1.04964		1
1.5191	0.46923	0.30338	0.15346	-0.58917	1.17422	0.97232	0.86755	0.83983	0.89081	-0.7206	0.95566	1.11878	0.88693	0.94485	1.25647	0.18965	1.03321	-0.46454	-0.81936	-1.18017	-0.9102	-0.85556	-0.244	0.99426	1.18722	0.56173	0.57983	1.08151	1.21394	1.10103	1.04964		1
0.6905	1.30878	0.30338	1.03449	1.10204	0.33157	0.97232	-0.00327	-0.07949	0.89081	0.12754	0.11206	-0.48695	0.88693	0.14444	0.49572	1.02581	1.03321	-0.46454	-0.81936	1.2933	-0.9102	-0.85556	1.04124	0.17882	-0.40505	-0.24017	-0.23767	0.24604	-0.38991	0.28598	1.04964		1
0.6905	0.46923	1.12963	1.03449	1.10204	1.17422	0.97232	0.86755	0.83983	0.89081	0.97568	0.95566	-0.48695	0.88693	0.94485	-0.26502	1.02581	1.03321	-1.1523	-0.81936	-1.18017	-0.9102	-0.85556	-1.52925	0.99426	1.18722	1.36363	1.39734	1.08151	1.21394	1.10103	1.04964		1
-0.1381	1.30878	1.12963	1.03449	1.10204	1.17422	0.97232	0.86755	0.83983	0.89081	0.97568	0.95566	1.11878	0.88693	0.94485	1.25647	1.02581	1.03321	-1.1523	-0.81936	-1.18017	-0.9102	-0.85556	-1.52925	-0.63661	1.18722	1.36363	1.39734	1.08151	1.21394	1.10103	1.04964		1
0.6905	0.46923	1.12963	1.03449	1.10204	1.17422	0.97232	0.86755	-0.07949	0.89081	0.12754	0.11206	0.31591	0.04834	0.14444	0.49572	-0.6465	-1.26773	-0.46454	0.72092	-0.5618	-0.9102	-0.13915	-0.88663	0.99426	1.18722	-1.04207	1.39734	-0.58944	0.41202	1.10103	0.24656		1
0.6905	0.46923	0.30338	1.03449	1.10204	0.33157	0.97232	0.86755	0.83983	0.89081	0.12754	0.95566	-0.48695	0.04834	0.94485	0.49572	1.02581	1.03321	0.91098	-0.81936	1.2933	1.98358	-0.13915	1.04124	0.17882	-0.40505	-1.04207	0.57983	1.08151	0.41202	-0.52907	0.24656		1
1.5191	1.30878	1.12963	1.03449	1.10204	1.17422	0.97232	0.86755	0.83983	0.89081	0.97568	0.95566	-0.48695	0.04834	0.14444	0.49572	0.18965	-0.50075	-0.46454	-0.81936	-1.18017	-0.9102	-0.85556	-1.52925	0.99426	1.18722	1.36363	1.39734	1.08151	1.21394	1.10103	1.04964		1
0.6905	0.46923	1.12963	1.03449	1.10204	1.17422	0.97232	0.86755	0.83983	0.89081	0.97568	0.95566	1.11878	0.88693	0.94485	1.25647	1.02581	1.03321	-1.1523	-0.04922	-1.18017	0.53669	-0.85556	1.04124	0.99426	1.18722	-0.24017	-0.23767	1.08151	1.21394	0.28598	1.04964		1
0.6905	1.30878	0.30338	-0.72756	-0.58917	0.33157	0.08556	-0.00327	-0.07949	-0.01245	0.12754	0.95566	0.31591	-0.79025	-0.65598	-0.26502	0.18965	0.26623	0.22322	0.72092	0.05657	0.53669	-0.13915	-0.88663	0.99426	-0.40505	-1.04207	-0.23767	0.24604	-0.38991	0.28598	0.24656		1
-0.1381	-0.37033	-0.52288	0.15346	0.25644	0.33157	0.08556	-0.8741	-0.99881	-0.91572	-0.7206	-0.73154	-0.48695	0.04834	0.14444	-0.26502	0.18965	0.26623	0.22322	-0.04922	-0.5618	0.53669	0.57725	0.39862	0.17882	0.39108	-0.24017	-0.23767	0.24604	-0.38991	-0.52907	-0.55652		1
1.5191	1.30878	1.12963	1.03449	1.10204	1.17422	0.97232	0.86755	0.83983	0.89081	0.97568	0.95566	1.11878	0.88693	0.94485	1.25647	1.02581	1.03321	-1.1523	-0.81936	-1.18017	-0.9102	-0.85556	-1.52925	0.99426	1.18722	1.36363	1.39734	1.08151	1.21394	1.10103	1.04964		1
-0.1381	-0.37033	0.30338	0.15346	-0.58917	0.33157	0.08556	-0.00327	-0.07949	-0.01245	-0.7206	0.11206	-0.48695	0.04834	-0.65598	-0.26502	0.18965	0.26623	-1.1523	-0.04922	0.05657	0.53669	-0.13915	0.39862	0.17882	0.39108	-0.24017	0.57983	0.24604	0.41202	-0.52907	-0.55652		1
-0.1381	-0.37033	-0.52288	-0.72756	-0.58917	-0.51108	0.97232	0.86755	0.83983	0.89081	-2.41688	0.95566	-0.48695	-0.79025	-0.65598	0.49572	-0.6465	1.03321	-1.1523	-0.81936	1.2933	-0.9102	-0.85556	-1.52925	0.99426	-0.40505	-0.24017	-0.23767	0.24604	-0.38991	1.10103	-0.55652		1
-1.7953	-2.04944	-0.52288	-0.72756	-1.43477	-2.19638	-2.57469	-0.8741	0.83983	0.89081	0.97568	0.95566	-0.48695	0.04834	-0.65598	0.49572	0.18965	0.26623	-1.1523	-0.81936	-1.18017	-0.9102	-0.85556	1.04124	-0.63661	-1.99732	1.36363	-0.23767	0.24604	1.21394	1.10103	1.04964		1
-0.1381	-0.37033	-0.52288	-0.72756	-0.58917	-0.51108	0.08556	0.86755	0.83983	0.89081	0.97568	-0.73154	0.31591	0.04834	0.14444	0.49572	0.18965	0.26623	-1.1523	-0.81936	-1.18017	-0.9102	-0.85556	-0.244	0.17882	0.39108	0.56173	0.57983	0.24604	0.41202	0.28598	1.04964		1
-0.1381	0.46923	0.30338	0.15346	0.25644	-0.51108	0.08556	-0.00327	-0.07949	-0.01245	0.12754	0.11206	0.31591	0.88693	-1.4564	0.49572	0.18965	-0.50075	0.91098	-0.81936	1.2933	-0.18675	-0.13915	1.04124	-0.63661	0.39108	0.56173	1.39734	-0.58944	1.21394	1.10103	0.24656		1
1.5191	1.30878	1.12963	1.03449	1.10204	1.17422	0.97232	0.86755	0.83983	0.89081	0.97568	0.11206	1.11878	0.88693	0.94485	1.25647	1.02581	1.03321	-1.1523	-0.81936	-1.18017	-0.9102	-0.85556	1.04124	0.99426	1.18722	1.36363	1.39734	1.08151	1.21394	1.10103	1.04964		1
1.5191	1.30878	1.12963	1.03449	1.10204	1.17422	0.97232	0.86755	0.83983	0.89081	-0.7206	0.95566	1.11878	0.88693	0.94485	1.25647	1.02581	1.03321	0.22322	-0.81936	1.2933	0.53669	0.57725	1.04124	0.99426	0.39108	1.36363	-0.23767	0.24604	1.21394	1.10103	-0.55652		1
-1.7953	-2.04944	-0.52288	-1.60859	-1.43477	-1.35373	-1.68794	-0.00327	-0.07949	-0.01245	0.12754	0.11206	0.31591	0.04834	-0.65598	0.49572	0.18965	0.26623	-1.1523	-0.81936	-1.18017	-0.9102	-0.85556	-1.52925	0.17882	-0.40505	-0.24017	-0.23767	-0.58944	-0.38991	-0.52907	0.24656		1
-0.1381	-0.37033	-0.52288	-0.72756	-0.58917	-0.51108	0.97232	-0.8741	-0.07949	-0.01245	-1.56874	-1.57514	0.31591	0.04834	-0.65598	-1.02576	-0.6465	0.26623	-0.46454	-0.04922	0.67494	0.53669	1.29366	0.39862	0.17882	-0.40505	1.36363	-0.23767	0.24604	-0.38991	1.10103	-1.3596		1
-1.7953	-2.04944	1.12963	1.03449	1.10204	1.17422	0.97232	0.86755	0.83983	0.89081	0.97568	0.95566	1.11878	0.88693	0.94485	1.25647	1.02581	1.03321	-1.1523	-0.81936	1.2933	-0.9102	-0.85556	1.04124	0.99426	1.18722	1.36363	1.39734	1.08151	1.21394	1.10103	1.04964		1
-0.1381	-1.20989	-1.34914	-1.60859	-0.58917	-1.35373	0.08556	-0.8741	-0.07949	-1.81898	-0.7206	0.95566	0.31591	0.88693	0.94485	-1.02576	0.18965	1.03321	-1.1523	-0.81936	-1.18017	-0.9102	-0.85556	-1.52925	-1.45204	0.39108	0.56173	0.57983	0.24604	1.21394	0.28598	0.24656		1
0.6905	-0.37033	-0.52288	1.03449	-0.58917	0.33157	0.08556	0.86755	0.83983	0.89081	0.97568	0.95566	1.11878	0.04834	0.94485	-0.26502	1.02581	1.03321	-1.1523	-0.81936	-1.18017	-0.9102	-0.85556	-1.52925	0.99426	1.18722	0.56173	1.39734	1.08151	1.21394	1.10103	-0.55652		1
0.6905	0.46923	0.30338	0.15346	0.25644	0.33157	0.08556	-0.00327	-0.07949	-0.01245	0.12754	0.11206	-0.48695	0.04834	0.14444	0.49572	-0.6465	-0.50075	-0.46454	-0.04922	0.05657	-0.18675	-0.13915	-0.244	-0.63661	-0.40505	-0.24017	-0.23767	-0.58944	-0.38991	-0.52907	-0.55652		1
-0.1381	0.46923	1.12963	1.03449	1.10204	1.17422	0.97232	0.86755	0.83983	0.89081	0.97568	0.95566	1.11878	0.88693	0.94485	0.49572	1.02581	1.03321	-1.1523	-0.81936	-1.18017	-0.9102	-0.85556	-0.244	0.99426	1.18722	1.36363	1.39734	1.08151	1.21394	1.10103	1.04964		1
1.5191	1.30878	1.12963	1.03449	1.10204	1.17422	0.97232	0.86755	0.83983	0.89081	0.97568	0.95566	1.11878	0.88693	0.94485	0.49572	1.02581	1.03321	0.22322	-0.04922	1.2933	-0.18675	-0.13915	-0.88663	0.99426	1.18722	1.36363	1.39734	1.08151	1.21394	1.10103	1.04964		1
0.6905	0.46923	-0.52288	-0.72756	-0.58917	-0.51108	-0.80119	-0.00327	0.83983	-0.91572	0.12754	0.11206	1.11878	-1.62883	-1.4564	-1.78651	-0.6465	-2.03471	0.91098	-0.04922	1.2933	-0.9102	-0.85556	1.04124	0.99426	-0.40505	0.56173	0.57983	1.08151	-0.38991	1.10103	-0.55652		1
0.6905	-0.37033	-0.52288	-0.72756	-0.58917	-0.51108	0.97232	-0.00327	0.83983	-0.01245	0.12754	0.95566	1.11878	0.88693	0.94485	1.25647	1.02581	1.03321	1.59874	2.26121	-1.18017	1.98358	2.01006	1.04124	0.99426	1.18722	0.56173	0.57983	1.08151	0.41202	0.28598	-2.16268		1
0.6905	1.30878	0.30338	1.03449	1.10204	1.17422	0.97232	0.86755	0.83983	0.89081	0.97568	0.95566	0.31591	0.04834	0.14444	0.49572	0.18965	1.03321	-1.1523	-0.81936	-1.18017	-0.9102	-0.85556	-0.244	0.99426	-0.40505	-0.24017	0.57983	-0.58944	1.21394	1.10103	-0.55652		1
0.6905	1.30878	1.12963	1.03449	0.25644	1.17422	0.97232	0.86755	0.83983	0.89081	0.97568	0.95566	1.11878	0.88693	0.94485	1.25647	1.02581	1.03321	-1.1523	-0.81936	-1.18017	-0.9102	-0.85556	-0.88663	-1.45204	-1.20118	1.36363	-0.23767	1.08151	-0.38991	1.10103	0.24656		1
-0.1381	-0.37033	-0.52288	-0.72756	-0.58917	-0.51108	-0.80119	-0.00327	-0.07949	-0.01245	0.12754	0.11206	0.31591	0.04834	0.14444	-0.26502	-0.6465	0.26623	-0.46454	-0.04922	-1.18017	-0.9102	-0.85556	-0.244	0.17882	-0.40505	-0.24017	-0.23767	0.24604	-0.38991	-0.52907	-0.55652		1
-0.9667	0.46923	-1.34914	0.15346	0.25644	-1.35373	-0.80119	-0.8741	-0.99881	-0.91572	-0.7206	-1.57514	0.31591	0.04834	0.14444	0.49572	0.18965	0.26623	-1.1523	-0.81936	-1.18017	-0.9102	-0.85556	-1.52925	-0.63661	-0.40505	-0.24017	-0.23767	-0.58944	-1.19183	-0.52907	-0.55652		1
0.6905	-0.37033	-0.52288	0.15346	-0.58917	0.33157	-0.80119	0.86755	0.83983	0.89081	0.12754	0.95566	0.31591	-0.79025	0.94485	-0.26502	1.02581	1.03321	-1.1523	-0.81936	-1.18017	-0.9102	-0.85556	-1.52925	0.17882	-0.40505	-0.24017	0.57983	0.24604	0.41202	-0.52907	0.24656		1
0.6905	0.46923	0.30338	0.15346	0.25644	0.33157	0.08556	0.86755	0.83983	-0.01245	0.97568	0.95566	1.11878	0.88693	0.94485	1.25647	1.02581	1.03321	-0.46454	-0.04922	-0.5618	-0.18675	-0.13915	-0.88663	0.17882	-0.40505	0.56173	0.57983	-0.58944	-0.38991	1.10103	-1.3596		1
-0.1381	-0.37033	0.30338	-0.72756	0.25644	-0.51108	0.08556	-0.00327	-0.07949	-0.01245	0.12754	0.11206	-0.48695	0.04834	0.14444	-0.26502	-0.6465	0.26623	0.22322	0.72092	0.67494	0.53669	0.57725	0.39862	0.17882	-0.40505	-0.24017	-0.23767	0.24604	0.41202	0.28598	-0.55652		1
0.6905	0.46923	1.12963	1.03449	1.10204	1.17422	0.97232	0.86755	0.83983	0.89081	0.97568	0.95566	1.11878	0.88693	0.94485	-0.26502	1.02581	1.03321	0.22322	-0.04922	-0.5618	-0.9102	-0.85556	-0.244	-0.63661	1.18722	1.36363	1.39734	1.08151	1.21394	1.10103	1.04964		1
-0.1381	-0.37033	0.30338	-0.72756	-1.43477	-1.35373	-1.68794	-0.8741	-0.07949	-0.01245	0.12754	-1.57514	-1.28981	0.88693	-0.65598	0.49572	-0.6465	-0.50075	0.22322	0.72092	0.05657	0.53669	0.57725	-0.244	-0.63661	-0.40505	-0.24017	-0.23767	1.08151	1.21394	1.10103	-0.55652		1
0.6905	0.46923	-0.52288	-0.72756	0.25644	-0.51108	-0.80119	-0.00327	-0.07949	-0.01245	0.12754	0.11206	-0.48695	-0.79025	0.14444	0.49572	-0.6465	0.26623	0.22322	0.72092	0.67494	0.53669	0.57725	0.39862	-0.63661	-0.40505	-0.24017	-0.23767	0.24604	-0.38991	0.28598	-0.55652		1
-0.1381	-0.37033	0.30338	0.15346	-0.58917	-0.51108	0.08556	-0.00327	-0.07949	-0.01245	0.12754	-0.73154	-0.48695	0.88693	0.94485	0.49572	-0.6465	0.26623	0.91098	0.72092	1.2933	1.26013	0.57725	1.04124	0.17882	0.39108	-0.24017	-0.23767	0.24604	0.41202	1.10103	1.04964		1
1.5191	1.30878	1.12963	1.03449	1.10204	1.17422	0.97232	0.86755	0.83983	0.89081	0.97568	0.95566	1.11878	0.88693	0.94485	1.25647	1.02581	1.03321	0.22322	-0.81936	0.67494	-0.9102	-0.85556	-1.52925	0.99426	1.18722	1.36363	1.39734	1.08151	1.21394	1.10103	1.04964		1
1.5191	1.30878	1.12963	1.03449	1.10204	1.17422	0.97232	0.86755	0.83983	0.89081	0.97568	0.95566	1.11878	0.04834	0.14444	0.49572	1.02581	1.03321	-1.1523	-0.81936	-1.18017	-0.9102	-0.85556	-1.52925	0.99426	1.18722	1.36363	1.39734	1.08151	1.21394	1.10103	1.04964		1
-0.1381	0.46923	-0.52288	-0.72756	1.10204	-0.51108	0.97232	0.86755	0.83983	0.89081	0.97568	0.95566	-0.48695	0.88693	0.94485	-1.78651	-0.6465	1.03321	1.59874	-0.81936	1.2933	-0.9102	-0.85556	1.04124	0.17882	-0.40505	-0.24017	-0.23767	0.24604	0.41202	0.28598	-0.55652		1
-0.1381	-0.37033	-0.52288	-0.72756	-0.58917	-0.51108	-0.80119	0.86755	0.83983	0.89081	0.97568	0.95566	1.11878	0.88693	0.94485	-0.26502	1.02581	1.03321	-1.1523	-0.81936	1.2933	-0.9102	-0.85556	1.04124	0.99426	1.18722	-0.24017	0.57983	1.08151	1.21394	1.10103	1.04964		1
-0.9667	-1.20989	-0.52288	0.15346	-0.58917	-0.51108	-1.68794	-0.8741	-0.99881	-0.91572	-0.7206	-0.73154	-0.48695	-0.79025	-0.65598	-0.26502	-0.6465	-0.50075	0.22322	0.72092	0.05657	0.53669	0.57725	-0.244	0.17882	0.39108	0.56173	0.57983	-0.58944	-0.38991	-0.52907	0.24656		1
-0.1381	-0.37033	1.12963	0.15346	-0.58917	-0.51108	0.08556	0.86755	0.83983	0.89081	0.97568	0.95566	1.11878	0.88693	0.94485	1.25647	1.02581	1.03321	-0.46454	-0.81936	-0.5618	-0.18675	-0.13915	-0.88663	0.99426	1.18722	1.36363	1.39734	1.08151	1.21394	1.10103	1.04964		1
-0.1381	0.46923	0.30338	0.15346	0.25644	0.33157	0.08556	0.86755	0.83983	0.89081	0.97568	0.95566	-0.48695	0.88693	0.94485	1.25647	1.02581	1.03321	0.22322	0.72092	-1.18017	-0.9102	-0.85556	0.39862	0.99426	1.18722	-0.24017	-0.23767	-0.58944	1.21394	1.10103	1.04964		1
1.5191	1.30878	-0.52288	1.03449	1.10204	1.17422	0.97232	0.86755	0.83983	-0.01245	0.12754	0.11206	1.11878	0.04834	0.94485	-0.26502	0.18965	1.03321	-0.46454	-0.81936	-1.18017	-0.9102	-0.85556	0.39862	0.99426	1.18722	1.36363	1.39734	1.08151	1.21394	0.28598	0.24656		1
0.6905	0.46923	1.12963	1.03449	1.10204	1.17422	0.97232	0.86755	0.83983	0.89081	0.12754	0.11206	1.11878	0.04834	0.14444	0.49572	0.18965	1.03321	-0.46454	-0.81936	-1.18017	-0.9102	-0.85556	1.04124	0.17882	0.39108	0.56173	0.57983	0.24604	1.21394	1.10103	1.04964		1
-0.1381	1.30878	1.12963	1.03449	1.10204	1.17422	0.97232	0.86755	0.83983	0.89081	0.97568	0.95566	1.11878	0.04834	0.94485	1.25647	1.02581	1.03321	-1.1523	-0.81936	-1.18017	-0.9102	-0.85556	-1.52925	0.99426	1.18722	1.36363	1.39734	1.08151	1.21394	1.10103	1.04964		1
-0.9667	-0.37033	-0.52288	-0.72756	-0.58917	-1.35373	-0.80119	-0.00327	-0.07949	-0.01245	0.12754	0.11206	0.31591	0.04834	0.14444	0.49572	-1.48266	0.26623	1.59874	0.72092	-1.18017	-0.9102	-0.85556	-1.52925	0.17882	0.39108	-0.24017	-0.23767	-1.42492	0.41202	0.28598	0.24656		1
-0.1381	0.46923	-0.52288	0.15346	0.25644	0.33157	0.08556	-0.00327	-0.07949	-0.01245	0.12754	0.11206	-0.48695	-0.79025	-0.65598	-1.02576	-0.6465	-0.50075	0.22322	-0.04922	0.05657	-0.18675	-0.13915	1.04124	0.99426	0.39108	-0.24017	0.57983	0.24604	-0.38991	0.28598	0.24656		1
-0.1381	-0.37033	-0.52288	-0.72756	-0.58917	-0.51108	-0.80119	0.86755	0.83983	0.89081	0.97568	0.95566	1.11878	0.88693	0.94485	1.25647	1.02581	1.03321	-1.1523	-0.81936	-1.18017	-0.9102	-0.85556	-1.52925	0.17882	1.18722	-0.24017	-0.23767	0.24604	0.41202	0.28598	-0.55652		1
1.5191	1.30878	1.12963	1.03449	1.10204	1.17422	0.97232	0.86755	0.83983	0.89081	0.97568	0.95566	1.11878	0.88693	0.94485	1.25647	1.02581	1.03321	-1.1523	-0.81936	-1.18017	-0.9102	-0.85556	-1.52925	0.99426	1.18722	1.36363	1.39734	1.08151	1.21394	1.10103	1.04964		1
1.5191	1.30878	1.12963	1.03449	1.10204	1.17422	0.97232	-0.8741	-0.99881	-0.91572	-0.7206	-0.73154	-0.48695	0.88693	0.94485	-0.26502	0.18965	0.26623	0.22322	0.72092	1.2933	1.98358	2.01006	1.04124	-0.63661	-0.40505	-0.24017	-0.23767	-0.58944	-0.38991	-0.52907	-0.55652		1
-0.1381	0.46923	0.30338	-0.72756	-0.58917	0.33157	0.08556	-0.00327	-0.07949	-0.01245	0.97568	0.11206	1.11878	0.88693	0.14444	-0.26502	0.18965	1.03321	-1.1523	-0.81936	-1.18017	-0.9102	-0.85556	0.39862	0.17882	-0.40505	-1.04207	-0.23767	0.24604	0.41202	0.28598	0.24656		1
0.6905	-0.37033	-1.34914	1.03449	-1.43477	-1.35373	0.97232	0.86755	0.83983	0.89081	0.97568	-0.73154	0.31591	0.88693	0.94485	-0.26502	-0.6465	1.03321	1.59874	-0.81936	1.2933	1.26013	-0.85556	1.04124	0.17882	0.39108	-1.04207	-0.23767	1.08151	1.21394	-1.34411	-0.55652		1
1.5191	1.30878	1.12963	1.03449	1.10204	1.17422	0.97232	0.86755	0.83983	0.89081	0.97568	0.95566	1.11878	0.88693	0.94485	1.25647	1.02581	1.03321	-1.1523	-0.81936	-1.18017	-0.9102	-0.85556	-1.52925	0.99426	1.18722	1.36363	1.39734	1.08151	1.21394	1.10103	1.04964		1
-0.9667	-1.20989	-0.52288	0.15346	0.25644	-0.51108	0.97232	-0.00327	-0.07949	-0.01245	0.12754	0.11206	-0.48695	-0.79025	0.14444	-0.26502	1.02581	0.26623	0.91098	0.72092	-1.18017	-0.9102	-0.85556	-0.244	0.99426	1.18722	0.56173	-0.23767	1.08151	1.21394	1.10103	0.24656		1
-0.9667	-1.20989	-0.52288	-0.72756	-0.58917	-0.51108	-0.80119	0.86755	-0.07949	-0.01245	-0.7206	0.11206	-0.48695	0.04834	0.14444	-0.26502	0.18965	-0.50075	-1.1523	-0.81936	0.67494	0.53669	0.57725	0.39862	0.99426	0.39108	-0.24017	-0.23767	0.24604	0.41202	0.28598	0.24656		1
0.6905	1.30878	0.30338	1.03449	0.25644	1.17422	0.97232	0.86755	0.83983	0.89081	0.97568	0.11206	-0.48695	0.88693	0.94485	-0.26502	1.02581	1.03321	0.22322	-0.81936	1.2933	-0.18675	0.57725	1.04124	0.99426	0.39108	-0.24017	-1.87268	-0.58944	-0.38991	-0.52907	-0.55652		1
0.6905	1.30878	1.12963	1.03449	1.10204	1.17422	0.97232	0.86755	0.83983	0.89081	0.97568	0.95566	0.31591	0.88693	0.94485	1.25647	1.02581	1.03321	0.91098	-0.81936	-0.5618	-0.9102	-0.85556	-0.244	0.99426	0.39108	-0.24017	0.57983	1.08151	1.21394	1.10103	0.24656		1
-0.1381	-0.37033	-0.52288	-0.72756	1.10204	-0.51108	-0.80119	0.86755	0.83983	0.89081	0.97568	0.95566	0.31591	0.88693	0.94485	0.49572	1.02581	0.26623	-0.46454	-0.81936	1.2933	-0.9102	-0.85556	1.04124	0.99426	1.18722	1.36363	0.57983	1.08151	1.21394	1.10103	-1.3596		1
-0.9667	-1.20989	-1.34914	-0.72756	-0.58917	-1.35373	-0.80119	-0.8741	-0.99881	-0.91572	-0.7206	-1.57514	-1.28981	-0.79025	-0.65598	-0.26502	-0.6465	-0.50075	0.22322	0.72092	0.05657	0.53669	1.29366	0.39862	0.17882	-1.20118	-0.24017	-1.05518	-0.58944	-1.19183	-1.34411	-1.3596		1
0.6905	0.46923	0.30338	0.15346	0.25644	0.33157	0.08556	0.86755	0.83983	0.89081	0.97568	0.95566	1.11878	0.88693	0.94485	1.25647	1.02581	1.03321	-1.1523	-0.81936	-1.18017	-0.9102	-0.85556	-1.52925	0.99426	1.18722	-1.84397	1.39734	1.08151	1.21394	1.10103	1.04964		1
-0.1381	1.30878	1.12963	1.03449	1.10204	1.17422	0.97232	0.86755	0.83983	0.89081	0.97568	0.95566	1.11878	0.88693	0.94485	-0.26502	0.18965	-0.50075	0.22322	-0.81936	-1.18017	-0.9102	-0.85556	-0.244	0.17882	1.18722	0.56173	0.57983	1.08151	1.21394	1.10103	1.04964		1
-0.1381	-0.37033	1.12963	-0.72756	-0.58917	-0.51108	-0.80119	0.86755	0.83983	0.89081	0.97568	0.95566	1.11878	0.88693	0.94485	1.25647	-1.48266	-1.26773	-1.1523	-0.81936	-1.18017	-0.9102	-0.85556	-1.52925	0.99426	1.18722	1.36363	1.39734	1.08151	1.21394	1.10103	1.04964		1
0.6905	1.30878	1.12963	1.03449	1.10204	1.17422	0.97232	0.86755	0.83983	0.89081	0.97568	0.11206	1.11878	0.88693	0.94485	1.25647	0.18965	-0.50075	0.91098	-0.81936	-1.18017	-0.9102	-0.85556	1.04124	0.17882	1.18722	-0.24017	0.57983	1.08151	0.41202	0.28598	0.24656		1
0.6905	-0.37033	-0.52288	0.15346	-0.58917	-0.51108	-0.80119	-0.00327	-0.99881	-0.91572	-0.7206	0.11206	-0.48695	-0.79025	0.14444	-0.26502	-0.6465	-0.50075	-1.1523	-0.81936	-0.5618	-0.9102	-0.85556	-1.52925	0.99426	0.39108	1.36363	-0.23767	0.24604	-0.38991	0.28598	-0.55652		1
-0.1381	0.46923	0.30338	1.03449	0.25644	1.17422	0.97232	-0.00327	-0.07949	-0.91572	-0.7206	-0.73154	-0.48695	0.04834	0.14444	-1.02576	-0.6465	-1.26773	-0.46454	-0.81936	-1.18017	-0.9102	-0.85556	-0.244	0.99426	-0.40505	-0.24017	-0.23767	0.24604	0.41202	1.10103	0.24656		1
-0.1381	-0.37033	0.30338	0.15346	-0.58917	-0.51108	0.08556	0.86755	0.83983	0.89081	0.97568	0.95566	-0.48695	-0.79025	-0.65598	-0.26502	1.02581	1.03321	0.22322	-0.81936	-1.18017	0.53669	1.29366	0.39862	0.17882	0.39108	-0.24017	-0.23767	-0.58944	-1.19183	0.28598	1.04964		1
0.6905	-0.37033	0.30338	0.15346	0.25644	0.33157	0.08556	-0.00327	-0.07949	-0.01245	0.12754	0.95566	-0.48695	-0.79025	-0.65598	0.49572	-0.6465	-0.50075	-1.1523	-0.81936	-1.18017	-0.9102	-0.85556	-0.88663	0.17882	-0.40505	0.56173	-0.23767	0.24604	0.41202	-0.52907	0.24656		1
0.6905	-0.37033	-0.52288	0.15346	0.25644	0.33157	0.08556	0.86755	0.83983	0.89081	0.97568	0.95566	0.31591	0.04834	0.14444	0.49572	1.02581	0.26623	-1.1523	-0.81936	-0.5618	-0.9102	-0.85556	-1.52925	0.17882	0.39108	0.56173	0.57983	0.24604	0.41202	0.28598	1.04964		1
0.6905	0.46923	1.12963	1.03449	1.10204	1.17422	0.97232	0.86755	0.83983	-0.01245	0.97568	0.95566	-0.48695	0.88693	0.94485	-1.02576	0.18965	1.03321	0.91098	-0.81936	1.2933	-0.9102	-0.85556	1.04124	0.99426	0.39108	0.56173	0.57983	1.08151	0.41202	1.10103	0.24656		1
0.6905	0.46923	0.30338	1.03449	0.25644	0.33157	0.97232	0.86755	0.83983	-0.01245	0.12754	0.95566	-0.48695	0.88693	0.94485	-0.26502	0.18965	1.03321	0.91098	-0.81936	-1.18017	-0.9102	-0.85556	0.39862	0.17882	0.39108	-0.24017	0.57983	0.24604	0.41202	0.28598	0.24656		1
-1.7953	-1.20989	-1.34914	1.03449	1.10204	0.33157	0.97232	0.86755	0.83983	0.89081	0.97568	0.95566	-0.48695	0.88693	0.94485	1.25647	1.02581	1.03321	1.59874	-0.81936	-0.5618	-0.9102	-0.85556	1.04124	0.99426	1.18722	1.36363	1.39734	1.08151	1.21394	1.10103	1.04964		1
-0.1381	-0.37033	-0.52288	-0.72756	-0.58917	-0.51108	-0.80119	-0.8741	-0.99881	-0.01245	0.12754	0.11206	-0.48695	0.04834	0.94485	-0.26502	0.18965	0.26623	0.91098	0.72092	0.05657	0.53669	0.57725	0.39862	0.17882	-0.40505	0.56173	-0.23767	-0.58944	-0.38991	-0.52907	-0.55652		1
0.6905	0.46923	0.30338	0.15346	0.25644	-0.51108	0.97232	0.86755	0.83983	0.89081	0.97568	-0.73154	1.11878	0.88693	0.94485	-0.26502	1.02581	1.03321	0.22322	-0.04922	0.05657	0.53669	-0.13915	1.04124	0.99426	1.18722	0.56173	0.57983	1.08151	-0.38991	0.28598	1.04964		1
-0.1381	-0.37033	-0.52288	0.15346	0.25644	0.33157	0.08556	-1.74492	-0.99881	-0.01245	-0.7206	0.11206	-0.48695	0.88693	-0.65598	-0.26502	-0.6465	-0.50075	0.91098	0.72092	-0.5618	1.26013	0.57725	-0.244	-0.63661	-0.40505	-0.24017	0.57983	-0.58944	-0.38991	0.28598	0.24656		1
-0.1381	0.46923	-0.52288	1.03449	1.10204	0.33157	0.08556	0.86755	0.83983	0.89081	0.97568	0.95566	1.11878	0.88693	0.14444	1.25647	1.02581	1.03321	-1.1523	-0.81936	-1.18017	-0.9102	-0.13915	-1.52925	0.99426	1.18722	1.36363	1.39734	0.24604	0.41202	1.10103	0.24656		1
1.5191	1.30878	1.12963	1.03449	1.10204	1.17422	0.97232	0.86755	0.83983	0.89081	0.97568	-0.73154	-0.48695	-0.79025	-0.65598	-0.26502	-0.6465	-0.50075	-0.46454	-0.81936	-1.18017	-0.9102	-0.85556	-1.52925	0.99426	1.18722	1.36363	1.39734	1.08151	-0.38991	1.10103	1.04964		1
-0.1381	0.46923	-0.52288	0.15346	0.25644	-0.51108	0.08556	-0.00327	-0.07949	-0.01245	0.12754	-0.73154	-1.28981	-2.46742	-2.25682	-0.26502	-2.31881	0.26623	0.22322	-0.04922	0.05657	-0.18675	-0.13915	-0.88663	0.17882	1.18722	-0.24017	0.57983	0.24604	0.41202	0.28598	1.04964		1
-0.1381	1.30878	1.12963	1.03449	1.10204	1.17422	0.97232	0.86755	-0.07949	-0.01245	0.12754	0.95566	1.11878	0.04834	0.94485	-0.26502	-0.6465	1.03321	-0.46454	-0.81936	0.67494	-0.9102	-0.85556	0.39862	0.17882	-0.40505	0.56173	-0.23767	0.24604	0.41202	0.28598	-0.55652		1
1.5191	1.30878	1.12963	1.03449	1.10204	1.17422	0.97232	0.86755	0.83983	0.89081	0.97568	-1.57514	-0.48695	-0.79025	-1.4564	-1.02576	-1.48266	-1.26773	-1.1523	-0.81936	1.2933	-0.9102	-0.85556	1.04124	0.17882	1.18722	1.36363	1.39734	1.08151	1.21394	1.10103	1.04964		1
-0.9667	-0.37033	-1.34914	-0.72756	0.25644	0.33157	-0.80119	-0.00327	-0.07949	-0.01245	0.12754	-0.73154	-0.48695	-0.79025	-1.4564	-0.26502	-0.6465	0.26623	0.22322	0.72092	-0.5618	-0.18675	-0.13915	-0.244	0.17882	0.39108	-0.24017	-0.23767	0.24604	-0.38991	0.28598	1.04964		1
1.5191	1.30878	1.12963	1.03449	1.10204	1.17422	0.97232	0.86755	0.83983	0.89081	0.97568	-0.73154	-0.48695	-0.79025	-0.65598	-1.02576	-1.48266	-0.50075	-1.1523	-0.81936	-1.18017	-0.9102	-0.85556	-1.52925	0.99426	1.18722	1.36363	1.39734	1.08151	1.21394	1.10103	1.04964		1
-1.7953	1.30878	1.12963	1.03449	0.25644	0.33157	0.08556	0.86755	-0.07949	-0.01245	0.12754	-0.73154	-0.48695	-0.79025	-0.65598	-0.26502	-0.6465	-0.50075	1.59874	-0.81936	0.67494	1.26013	1.29366	0.39862	0.99426	1.18722	0.56173	1.39734	1.08151	1.21394	1.10103	1.04964		1
0.6905	0.46923	0.30338	1.03449	1.10204	1.17422	-2.57469	-0.00327	0.83983	0.89081	0.97568	-0.73154	-0.48695	-0.79025	-0.65598	-0.26502	-0.6465	-0.50075	-1.1523	-0.81936	-1.18017	-0.9102	-0.85556	-1.52925	0.99426	1.18722	0.56173	1.39734	1.08151	1.21394	1.10103	1.04964		1
-0.1381	-0.37033	1.12963	-0.72756	-0.58917	-0.51108	0.97232	-0.8741	-0.99881	-0.91572	-2.41688	-0.73154	-0.48695	0.88693	-1.4564	-0.26502	-0.6465	-1.26773	-1.1523	-0.81936	-1.18017	-0.9102	-0.85556	-1.52925	-0.63661	1.18722	1.36363	1.39734	-0.58944	1.21394	-0.52907	1.04964		1
1.5191	1.30878	1.12963	1.03449	1.10204	1.17422	0.97232	0.86755	0.83983	0.89081	0.97568	-0.73154	-1.28981	-1.62883	-0.65598	-0.26502	-1.48266	-0.50075	-1.1523	-0.81936	-1.18017	-0.9102	-0.85556	-1.52925	0.99426	1.18722	1.36363	1.39734	1.08151	1.21394	1.10103	1.04964		1
-0.9667	-1.20989	1.12963	-0.72756	-0.58917	-2.19638	0.97232	-0.00327	-0.99881	-0.91572	0.97568	0.95566	1.11878	-1.62883	-1.4564	-1.02576	-1.48266	-1.26773	-1.1523	-0.04922	1.2933	-0.18675	-0.13915	-0.88663	0.99426	1.18722	0.56173	0.57983	1.08151	1.21394	1.10103	1.04964		1
1.5191	1.30878	1.12963	1.03449	1.10204	1.17422	0.97232	0.86755	0.83983	0.89081	0.97568	0.95566	1.11878	0.88693	0.94485	1.25647	1.02581	1.03321	0.22322	-0.81936	-1.18017	-0.9102	-0.85556	-0.244	0.99426	1.18722	1.36363	1.39734	1.08151	1.21394	1.10103	-2.16268		1
-0.1381	-0.37033	0.30338	-0.72756	-0.58917	-0.51108	0.08556	-0.00327	-0.07949	-0.91572	0.12754	-0.73154	-0.48695	-0.79025	0.14444	-0.26502	-1.48266	-0.50075	0.91098	1.49107	0.05657	0.53669	1.29366	-0.244	-0.63661	-0.40505	-1.84397	-1.87268	-0.58944	-1.99375	-1.34411	-2.16268		1
0.6905	1.30878	1.12963	1.03449	1.10204	1.17422	0.97232	0.86755	0.83983	0.89081	0.12754	0.95566	0.31591	-1.62883	-1.4564	0.49572	1.02581	0.26623	-0.46454	-0.81936	0.67494	-0.9102	-0.85556	0.39862	0.17882	0.39108	-0.24017	-0.23767	0.24604	0.41202	1.10103	1.04964		1
-0.1381	1.30878	0.30338	1.03449	1.10204	-0.51108	0.97232	0.86755	0.83983	0.89081	-0.7206	0.95566	1.11878	0.88693	0.94485	-0.26502	-0.6465	1.03321	-1.1523	-0.81936	-1.18017	-0.9102	-0.85556	-1.52925	0.17882	-0.40505	-0.24017	0.57983	0.24604	1.21394	0.28598	1.04964		1
-0.1381	-0.37033	-0.52288	0.15346	-0.58917	0.33157	-0.80119	-0.00327	-0.07949	-0.01245	-0.7206	0.11206	0.31591	0.04834	0.14444	-0.26502	-0.6465	0.26623	-0.46454	-0.81936	1.2933	-0.18675	-0.13915	1.04124	-0.63661	-0.40505	-0.24017	-0.23767	-1.42492	-0.38991	-0.52907	-0.55652		1
0.6905	0.46923	1.12963	1.03449	0.25644	0.33157	0.08556	-0.00327	-0.07949	-0.01245	0.12754	-0.73154	-0.48695	-0.79025	-0.65598	-0.26502	-0.6465	-0.50075	0.22322	0.72092	0.05657	0.53669	0.57725	-0.244	-0.63661	-0.40505	-0.24017	-0.23767	-0.58944	-0.38991	-0.52907	-0.55652		1
0.6905	0.46923	0.30338	0.15346	1.10204	1.17422	0.97232	0.86755	0.83983	0.89081	0.97568	0.95566	1.11878	0.04834	0.14444	1.25647	0.18965	1.03321	0.22322	0.72092	-0.5618	0.53669	-0.85556	-1.52925	0.17882	0.39108	-0.24017	0.57983	-0.58944	-0.38991	0.28598	1.04964		1
-0.9667	-1.20989	1.12963	-0.72756	-1.43477	-1.35373	-0.80119	-0.00327	-0.07949	-0.91572	-0.7206	0.11206	-0.48695	-0.79025	-0.65598	-0.26502	-0.6465	-0.50075	-0.46454	0.72092	1.2933	-0.9102	-0.13915	1.04124	0.99426	-0.40505	1.36363	1.39734	-0.58944	0.41202	-0.52907	0.24656		1
-0.1381	0.46923	0.30338	0.15346	1.10204	0.33157	0.08556	0.86755	0.83983	0.89081	0.97568	0.95566	0.31591	0.04834	0.14444	1.25647	1.02581	1.03321	-1.1523	-0.81936	-1.18017	-0.9102	-0.85556	-0.88663	0.99426	1.18722	0.56173	0.57983	-0.58944	1.21394	1.10103	1.04964		1
1.5191	1.30878	1.12963	1.03449	1.10204	1.17422	0.97232	-0.8741	0.83983	0.89081	0.97568	-1.57514	-1.28981	0.88693	-1.4564	-0.26502	-0.6465	-0.50075	-1.1523	-0.81936	-1.18017	-0.9102	-0.85556	1.04124	0.99426	1.18722	-0.24017	1.39734	-0.58944	1.21394	1.10103	1.04964		1
-0.1381	-0.37033	-0.52288	-0.72756	-0.58917	-0.51108	0.97232	0.86755	-0.07949	0.89081	0.12754	-1.57514	0.31591	0.88693	0.14444	1.25647	0.18965	-0.50075	0.91098	-0.04922	0.67494	-0.18675	1.29366	-0.88663	-0.63661	0.39108	0.56173	1.39734	1.08151	0.41202	1.10103	1.04964		1
-0.1381	0.46923	1.12963	0.15346	0.25644	1.17422	0.97232	0.86755	0.83983	0.89081	0.97568	-1.57514	0.31591	0.88693	0.94485	-0.26502	-0.6465	-0.50075	1.59874	-0.04922	-0.5618	0.53669	2.01006	1.04124	0.99426	0.39108	0.56173	-0.23767	1.08151	0.41202	-0.52907	-0.55652		1
-1.7953	-2.04944	-2.1754	-2.48962	-2.28038	-2.19638	-2.57469	-0.8741	-1.91812	-1.81898	-1.56874	-0.73154	0.31591	-0.79025	-0.65598	-0.26502	-0.6465	-0.50075	-0.46454	-0.04922	0.67494	0.53669	0.57725	-0.88663	-0.63661	-1.20118	-0.24017	-1.05518	-0.58944	-1.19183	-1.34411	-1.3596		1
1.5191	1.30878	1.12963	1.03449	1.10204	1.17422	0.97232	0.86755	0.83983	0.89081	0.97568	-1.57514	-0.48695	-1.62883	-0.65598	0.49572	-0.6465	-0.50075	-1.1523	-0.81936	-1.18017	-0.9102	-0.85556	-1.52925	0.99426	1.18722	1.36363	1.39734	1.08151	1.21394	1.10103	1.04964		1
0.6905	0.46923	0.30338	1.03449	0.25644	0.33157	0.08556	0.86755	0.83983	0.89081	0.97568	-1.57514	-1.28981	-1.62883	-0.65598	0.49572	0.18965	1.03321	-0.46454	-0.81936	-1.18017	-0.9102	-0.85556	1.04124	-0.63661	0.39108	0.56173	0.57983	1.08151	-0.38991	1.10103	1.04964		1
1.5191	1.30878	1.12963	1.03449	1.10204	1.17422	0.97232	0.86755	0.83983	0.89081	0.97568	-0.73154	-0.48695	-0.79025	-0.65598	-0.26502	-1.48266	-1.26773	-1.1523	-0.81936	1.2933	-0.9102	-0.85556	0.39862	0.99426	1.18722	1.36363	1.39734	-0.58944	-0.38991	-0.52907	1.04964		1
-0.9667	-1.20989	-0.52288	-1.60859	-1.43477	-1.35373	0.08556	-0.8741	-0.07949	-0.91572	-0.7206	-0.73154	-0.48695	-0.79025	-0.65598	-0.26502	-0.6465	-0.50075	0.22322	-0.04922	-0.5618	-0.18675	-0.13915	0.39862	-0.63661	-0.40505	-1.84397	-0.23767	0.24604	0.41202	-0.52907	-0.55652		1
-1.7953	1.30878	1.12963	1.03449	1.10204	1.17422	0.97232	0.86755	0.83983	0.89081	0.97568	0.11206	-0.48695	-0.79025	-0.65598	-0.26502	1.02581	1.03321	-1.1523	-0.81936	-1.18017	-0.9102	-0.85556	-1.52925	0.99426	1.18722	0.56173	1.39734	1.08151	1.21394	1.10103	1.04964		1
1.5191	1.30878	1.12963	1.03449	1.10204	1.17422	0.97232	0.86755	0.83983	0.89081	-2.41688	0.95566	1.11878	-0.79025	-0.65598	-0.26502	-0.6465	1.03321	-0.46454	-0.04922	-0.5618	-0.18675	-0.13915	-0.88663	0.99426	-1.99732	-0.24017	-0.23767	-2.2604	-1.99375	1.10103	1.04964		1
-0.1381	-0.37033	-0.52288	-0.72756	-0.58917	0.33157	0.08556	0.86755	0.83983	0.89081	0.97568	0.11206	0.31591	-0.79025	-0.65598	-0.26502	-0.6465	-0.50075	-1.1523	-0.81936	-0.5618	-0.9102	-0.85556	-0.88663	0.99426	0.39108	0.56173	0.57983	0.24604	1.21394	0.28598	0.24656		1
0.6905	0.46923	0.30338	0.15346	0.25644	0.33157	0.08556	-0.8741	-0.07949	-0.01245	0.12754	0.11206	-0.48695	-0.79025	0.14444	0.49572	0.18965	0.26623	0.22322	0.72092	0.05657	0.53669	0.57725	-0.244	0.17882	0.39108	-0.24017	-0.23767	-0.58944	-0.38991	-0.52907	-0.55652		1
1.5191	1.30878	1.12963	1.03449	1.10204	1.17422	0.97232	0.86755	0.83983	0.89081	0.97568	-0.73154	-0.48695	-0.79025	0.14444	0.49572	-0.6465	1.03321	-1.1523	-0.81936	-1.18017	-0.9102	-0.85556	-0.244	0.99426	1.18722	0.56173	0.57983	1.08151	0.41202	0.28598	0.24656		1
-0.1381	-0.37033	0.30338	0.15346	-0.58917	0.33157	-0.80119	0.86755	0.83983	0.89081	0.97568	0.95566	-0.48695	-0.79025	-0.65598	1.25647	1.02581	-0.50075	0.22322	-0.81936	0.05657	-0.9102	-0.85556	-0.244	0.99426	-1.20118	1.36363	-0.23767	1.08151	-1.19183	1.10103	0.24656		1
1.5191	1.30878	1.12963	0.15346	1.10204	0.33157	0.97232	0.86755	0.83983	-0.01245	0.12754	0.95566	0.31591	0.04834	0.14444	1.25647	1.02581	-0.50075	-0.46454	-0.04922	1.2933	-0.18675	-0.13915	-0.88663	0.99426	1.18722	-0.24017	0.57983	-0.58944	-0.38991	-0.52907	-0.55652		1
-0.1381	-0.37033	1.12963	1.03449	-0.58917	-0.51108	0.97232	-0.00327	-0.99881	-0.91572	0.12754	0.11206	-2.09268	-0.79025	0.94485	1.25647	-0.6465	-0.50075	-1.1523	-0.81936	-1.18017	-0.9102	-0.85556	1.04124	0.99426	0.39108	0.56173	-0.23767	-1.42492	0.41202	-0.52907	1.04964		1
-0.1381	-0.37033	-0.52288	-0.72756	-0.58917	-0.51108	-0.80119	-0.8741	-0.99881	-0.91572	-0.7206	-0.73154	-0.48695	0.88693	-0.65598	-0.26502	-0.6465	-0.50075	-0.46454	-0.04922	-0.5618	-0.18675	-0.13915	-0.244	0.99426	1.18722	0.56173	1.39734	1.08151	1.21394	1.10103	1.04964		1
-1.7953	-2.04944	0.30338	0.15346	0.25644	0.33157	-0.80119	0.86755	0.83983	0.89081	0.97568	-1.57514	-1.28981	-1.62883	-1.4564	-1.02576	-1.48266	1.03321	1.59874	2.26121	1.2933	1.98358	2.01006	1.04124	-0.63661	0.39108	1.36363	0.57983	-0.58944	1.21394	0.28598	0.24656		1
0.6905	1.30878	0.30338	1.03449	0.25644	0.33157	0.97232	0.86755	0.83983	-0.01245	0.12754	-1.57514	0.31591	-0.79025	-0.65598	-1.02576	0.18965	0.26623	-1.1523	-0.81936	-1.18017	-0.9102	-0.85556	-1.52925	0.17882	-0.40505	-0.24017	-0.23767	0.24604	-0.38991	0.28598	0.24656		1
-0.1381	-0.37033	1.12963	1.03449	1.10204	1.17422	0.97232	0.86755	0.83983	0.89081	0.97568	0.95566	1.11878	0.88693	0.14444	0.49572	0.18965	-0.50075	-1.1523	-0.81936	0.05657	-0.18675	-0.85556	-0.244	0.99426	1.18722	1.36363	1.39734	-0.58944	1.21394	1.10103	1.04964		1
-0.1381	-0.37033	-0.52288	-1.60859	-2.28038	-0.51108	-0.80119	0.86755	0.83983	0.89081	0.97568	-1.57514	-1.28981	-1.62883	-0.65598	-0.26502	-0.6465	-0.50075	-1.1523	-0.81936	-1.18017	-0.9102	-0.85556	-1.52925	-0.63661	-0.40505	-0.24017	0.57983	-1.42492	1.21394	1.10103	-1.3596		1
0.6905	1.30878	-0.52288	0.15346	0.25644	-0.51108	0.08556	0.86755	0.83983	0.89081	0.97568	-0.73154	-0.48695	-0.79025	-0.65598	-0.26502	-0.6465	-0.50075	-0.46454	-0.04922	1.2933	-0.9102	-0.13915	-0.244	0.99426	1.18722	1.36363	1.39734	1.08151	1.21394	-0.52907	1.04964		1
-0.1381	-0.37033	-0.52288	-0.72756	-0.58917	-0.51108	-0.80119	-0.8741	-0.99881	-0.91572	-0.7206	-2.41874	-2.09268	-0.79025	-0.65598	-0.26502	-0.6465	0.26623	1.59874	-0.81936	0.05657	1.98358	-0.85556	-0.244	0.99426	1.18722	1.36363	-0.23767	-2.2604	-0.38991	-0.52907	-0.55652		1
-0.1381	-0.37033	-0.52288	-0.72756	-0.58917	-0.51108	-0.80119	-1.74492	-0.99881	-0.91572	-0.7206	-0.73154	-0.48695	-0.79025	-0.65598	-0.26502	-0.6465	-0.50075	0.91098	-0.04922	-0.5618	-0.18675	-0.13915	-0.244	-0.63661	-0.40505	-0.24017	-0.23767	-0.58944	-0.38991	-0.52907	-0.55652		1
0.6905	0.46923	0.30338	0.15346	0.25644	-0.51108	-0.80119	-0.00327	-0.07949	-0.01245	0.12754	-1.57514	-1.28981	-1.62883	-1.4564	-1.02576	-1.48266	-1.26773	0.91098	0.72092	0.67494	0.53669	-0.13915	0.39862	0.17882	1.18722	0.56173	0.57983	0.24604	0.41202	0.28598	0.24656		1
1.5191	1.30878	1.12963	1.03449	1.10204	1.17422	0.97232	0.86755	0.83983	0.89081	0.97568	-1.57514	-1.28981	0.04834	-2.25682	-1.78651	-2.31881	-1.26773	-1.1523	-0.81936	-1.18017	-0.9102	-0.85556	-0.244	0.99426	1.18722	1.36363	1.39734	1.08151	1.21394	1.10103	1.04964		1
-0.1381	0.46923	1.12963	0.15346	-0.58917	-0.51108	0.97232	0.86755	-0.07949	-0.91572	-0.7206	0.11206	1.11878	0.88693	0.94485	-1.78651	-1.48266	-2.03471	0.91098	0.72092	-1.18017	-0.9102	-0.85556	-1.52925	0.99426	0.39108	-1.04207	-0.23767	1.08151	0.41202	-0.52907	1.04964		1
1.5191	-0.37033	-0.52288	-1.60859	-0.58917	-0.51108	-0.80119	0.86755	0.83983	0.89081	-2.41688	0.11206	0.31591	0.04834	0.14444	0.49572	0.18965	-2.03471	-0.46454	-0.04922	0.05657	0.53669	0.57725	-0.244	0.17882	0.39108	0.56173	0.57983	0.24604	0.41202	0.28598	0.24656		1
-0.1381	-0.37033	-0.52288	-0.72756	-0.58917	0.33157	-0.80119	-0.8741	-0.99881	-0.91572	-0.7206	-0.73154	-1.28981	-1.62883	-2.25682	-1.78651	0.18965	0.26623	1.59874	0.72092	0.67494	0.53669	0.57725	0.39862	0.99426	1.18722	0.56173	0.57983	0.24604	0.41202	0.28598	0.24656		1
-0.1381	-0.37033	-0.52288	-0.72756	0.25644	0.33157	0.08556	-0.8741	-0.99881	-0.91572	-0.7206	0.11206	-0.48695	0.04834	-0.65598	0.49572	0.18965	0.26623	-0.46454	-0.04922	-0.5618	-0.18675	-0.13915	-0.88663	0.17882	-0.40505	0.56173	-0.23767	0.24604	0.41202	-0.52907	-0.55652		1
-0.1381	-0.37033	-0.52288	-0.72756	-0.58917	-0.51108	0.08556	-0.8741	-0.99881	-1.81898	-0.7206	-1.57514	1.11878	-1.62883	-1.4564	1.25647	1.02581	1.03321	1.59874	0.72092	1.2933	1.98358	2.01006	1.04124	0.99426	-0.40505	-1.04207	-1.87268	1.08151	1.21394	-1.34411	-2.16268		1
0.6905	-0.37033	-0.52288	-0.72756	-0.58917	-0.51108	-0.80119	-0.8741	-0.99881	-0.91572	-0.7206	-1.57514	-0.48695	-2.46742	-2.25682	1.25647	0.18965	0.26623	-1.1523	-0.81936	1.2933	-0.9102	-0.85556	1.04124	-0.63661	-1.20118	-0.24017	-1.05518	-0.58944	1.21394	1.10103	1.04964		1
0.6905	0.46923	1.12963	1.03449	1.10204	1.17422	0.97232	-0.8741	-0.99881	-0.91572	0.12754	-1.57514	-1.28981	-1.62883	-1.4564	-1.02576	-1.48266	1.03321	0.22322	0.72092	0.05657	0.53669	0.57725	-0.244	0.17882	-0.40505	-0.24017	-0.23767	0.24604	-0.38991	-0.52907	-1.3596		1
-0.9667	-1.20989	-0.52288	-1.60859	-0.58917	-0.51108	-0.80119	-0.00327	-0.07949	-0.01245	-1.56874	-1.57514	0.31591	0.04834	-0.65598	-0.26502	-0.6465	1.03321	-0.46454	-0.81936	1.2933	-0.9102	-0.85556	1.04124	0.99426	-0.40505	1.36363	0.57983	1.08151	0.41202	-2.15916	-0.55652		1
-0.1381	1.30878	1.12963	1.03449	1.10204	1.17422	0.97232	-0.8741	-1.91812	-0.91572	-0.7206	-0.73154	-0.48695	-0.79025	-0.65598	-0.26502	-0.6465	-0.50075	-0.46454	-0.04922	-0.5618	-0.18675	-0.13915	-0.88663	-0.63661	-0.40505	1.36363	-1.05518	-0.58944	1.21394	1.10103	-0.55652		1
-0.1381	-0.37033	0.30338	-0.72756	-1.43477	0.33157	0.08556	-0.8741	-0.99881	-0.91572	0.12754	-1.57514	-0.48695	-1.62883	-0.65598	-1.02576	-1.48266	-0.50075	0.22322	2.26121	1.2933	0.53669	0.57725	1.04124	-1.45204	0.39108	0.56173	-0.23767	1.08151	1.21394	0.28598	-0.55652		1
0.6905	1.30878	1.12963	1.03449	1.10204	1.17422	0.97232	-0.8741	-0.99881	-0.01245	0.12754	0.95566	-0.48695	0.04834	-0.65598	-0.26502	0.18965	0.26623	0.22322	-0.04922	-0.5618	-0.18675	-0.13915	-0.244	0.17882	0.39108	0.56173	-0.23767	0.24604	0.41202	0.28598	-0.55652		1
-0.1381	-0.37033	-0.52288	-0.72756	-0.58917	-0.51108	-0.80119	0.86755	0.83983	0.89081	0.97568	0.11206	-0.48695	0.04834	0.14444	-0.26502	-0.6465	0.26623	0.22322	0.72092	1.2933	1.26013	0.57725	1.04124	0.17882	-0.40505	-1.04207	-1.87268	0.24604	-0.38991	-1.34411	-0.55652		1
-0.1381	-0.37033	-1.34914	-0.72756	-0.58917	-0.51108	0.97232	-1.74492	-0.99881	-0.91572	-0.7206	0.95566	-0.48695	0.88693	0.14444	-1.02576	1.02581	1.03321	-0.46454	-0.81936	-0.5618	-0.9102	-0.85556	-0.244	-0.63661	-0.40505	-1.04207	-0.23767	-0.58944	-0.38991	-0.52907	-0.55652		1
-0.1381	-0.37033	-0.52288	-0.72756	0.25644	-0.51108	0.08556	-0.8741	-0.99881	-0.01245	-0.7206	0.11206	0.31591	0.04834	0.14444	0.49572	0.18965	0.26623	0.22322	0.72092	0.05657	0.53669	0.57725	-0.244	-0.63661	-0.40505	-0.24017	-0.23767	0.24604	-0.38991	-0.52907	-0.55652		1
-0.1381	-0.37033	-0.52288	0.15346	0.25644	0.33157	0.08556	-0.8741	-0.07949	-0.01245	0.12754	0.95566	-1.28981	-1.62883	-1.4564	-0.26502	-1.48266	1.03321	-1.1523	-0.81936	0.67494	0.53669	-0.85556	0.39862	-0.63661	-0.40505	-0.24017	0.57983	0.24604	0.41202	-0.52907	-0.55652		1
-0.1381	-0.37033	-1.34914	-0.72756	-0.58917	-0.51108	-0.80119	0.86755	-0.99881	-0.91572	-0.7206	0.95566	1.11878	-1.62883	-1.4564	-1.02576	-0.6465	-0.50075	-1.1523	-0.81936	-1.18017	-0.9102	-0.85556	-1.52925	-0.63661	-0.40505	-0.24017	-0.23767	-0.58944	-0.38991	-0.52907	-0.55652		1
-0.1381	-0.37033	-0.52288	-0.72756	0.25644	-0.51108	0.08556	-0.00327	-0.07949	-0.01245	0.12754	-0.73154	-2.09268	-2.46742	-2.25682	-1.78651	-1.48266	-0.50075	0.22322	-0.04922	0.67494	1.26013	0.57725	-0.244	-0.63661	-0.40505	-1.04207	-0.23767	-0.58944	-0.38991	-0.52907	0.24656		1
-0.1381	-0.37033	-0.52288	0.15346	0.25644	0.33157	-1.68794	-0.00327	-0.07949	-0.91572	-0.7206	-0.73154	-1.28981	-2.46742	-2.25682	-0.26502	-2.31881	-2.03471	-1.1523	-0.81936	-1.18017	-0.9102	-0.85556	1.04124	-0.63661	-0.40505	-0.24017	-0.23767	0.24604	-0.38991	0.28598	0.24656		1
-0.1381	-0.37033	-0.52288	-0.72756	-0.58917	-0.51108	-0.80119	0.86755	0.83983	0.89081	0.97568	0.95566	-0.48695	0.88693	0.94485	1.25647	1.02581	1.03321	0.22322	0.72092	-1.18017	0.53669	0.57725	-0.88663	-0.63661	-0.40505	-0.24017	0.57983	0.24604	0.41202	0.28598	0.24656		1
-0.1381	-1.20989	-0.52288	-0.72756	-0.58917	-0.51108	-0.80119	-0.00327	-0.07949	-0.01245	-0.7206	0.11206	0.31591	0.04834	-0.65598	-0.26502	-1.48266	-0.50075	-0.46454	-0.81936	-1.18017	-0.9102	-0.85556	-1.52925	0.17882	0.39108	-0.24017	0.57983	0.24604	0.41202	0.28598	0.24656		1
-0.1381	-0.37033	-0.52288	0.15346	-0.58917	-0.51108	0.08556	0.86755	0.83983	0.89081	-0.7206	0.11206	0.31591	0.04834	0.14444	0.49572	0.18965	0.26623	-0.46454	-0.04922	1.2933	-0.9102	-0.85556	1.04124	0.99426	-0.40505	-0.24017	-0.23767	-0.58944	-0.38991	-0.52907	-0.55652		1
-0.1381	-0.37033	0.30338	0.15346	0.25644	1.17422	0.97232	0.86755	0.83983	0.89081	-0.7206	-1.57514	-1.28981	-1.62883	-1.4564	-1.02576	-1.48266	-1.26773	0.22322	-0.81936	-1.18017	-0.9102	-0.85556	-1.52925	0.99426	1.18722	1.36363	1.39734	1.08151	1.21394	1.10103	1.04964		1
1.5191	1.30878	1.12963	1.03449	-2.28038	1.17422	0.97232	0.86755	0.83983	0.89081	0.97568	-1.57514	-0.48695	-0.79025	-1.4564	-1.78651	-1.48266	-1.26773	-1.1523	-0.81936	-1.18017	-0.9102	-0.85556	1.04124	-0.63661	-0.40505	-1.04207	-0.23767	-0.58944	-0.38991	1.10103	1.04964		1
-0.1381	-0.37033	0.30338	1.03449	1.10204	1.17422	0.97232	-0.00327	-0.07949	-0.01245	0.12754	0.95566	0.31591	0.04834	0.14444	0.49572	0.18965	0.26623	-1.1523	-0.81936	-1.18017	-0.9102	-0.85556	-1.52925	-0.63661	-0.40505	-0.24017	-0.23767	0.24604	-0.38991	0.28598	1.04964		1
1.5191	1.30878	1.12963	1.03449	1.10204	1.17422	0.97232	0.86755	0.83983	0.89081	0.97568	-1.57514	-1.28981	-1.62883	-1.4564	-1.02576	-1.48266	-0.50075	-1.1523	-0.81936	-1.18017	-0.9102	-0.85556	-1.52925	-0.63661	-0.40505	-0.24017	0.57983	0.24604	0.41202	1.10103	1.04964		1
0.6905	0.46923	1.12963	1.03449	1.10204	1.17422	0.97232	0.86755	0.83983	0.89081	0.12754	-1.57514	-1.28981	-1.62883	-1.4564	0.49572	0.18965	-0.50075	-1.1523	-0.81936	1.2933	-0.9102	-0.85556	-0.88663	-0.63661	-0.40505	-1.04207	-0.23767	-0.58944	-0.38991	1.10103	1.04964		1
-1.7953	-2.04944	0.30338	-0.72756	-2.28038	-0.51108	-1.68794	0.86755	0.83983	0.89081	0.97568	0.11206	0.31591	-0.79025	0.14444	0.49572	-0.6465	-1.26773	-1.1523	-0.81936	1.2933	-0.9102	-0.85556	1.04124	-0.63661	-0.40505	-1.04207	-0.23767	-0.58944	-0.38991	1.10103	1.04964		1
-1.7953	1.30878	1.12963	1.03449	1.10204	1.17422	0.97232	0.86755	0.83983	0.89081	0.97568	0.95566	1.11878	0.88693	0.94485	1.25647	-0.6465	-1.26773	-1.1523	-0.81936	-1.18017	-0.9102	-0.85556	-1.52925	-0.63661	-0.40505	-0.24017	-0.23767	0.24604	-0.38991	1.10103	1.04964		1
-0.1381	0.46923	1.12963	1.03449	1.10204	-0.51108	-0.80119	0.86755	0.83983	0.89081	0.97568	0.95566	-2.09268	-2.46742	-2.25682	-1.78651	-1.48266	-2.03471	0.22322	-0.81936	-1.18017	-0.9102	-0.85556	1.04124	-0.63661	-0.40505	-0.24017	0.57983	0.24604	0.41202	1.10103	1.04964		1
1.5191	1.30878	1.12963	1.03449	1.10204	1.17422	0.97232	0.86755	0.83983	0.89081	0.97568	0.95566	1.11878	0.88693	0.94485	1.25647	-1.48266	-2.03471	-1.1523	-0.81936	-1.18017	-0.9102	-0.85556	-1.52925	-0.63661	-0.40505	-1.04207	-0.23767	-0.58944	-0.38991	1.10103	1.04964		1
-0.1381	-0.37033	0.30338	0.15346	-0.58917	1.17422	0.97232	0.86755	0.83983	0.89081	-0.7206	-0.73154	0.31591	0.88693	0.94485	-0.26502	-1.48266	-2.03471	-1.1523	-0.81936	0.05657	-0.9102	-0.85556	0.39862	-0.63661	-0.40505	-0.24017	-0.23767	0.24604	-0.38991	-0.52907	1.04964		1
-0.1381	-0.37033	1.12963	1.03449	-0.58917	1.17422	0.97232	0.86755	0.83983	0.89081	0.12754	0.95566	1.11878	0.88693	0.94485	1.25647	-1.48266	-2.03471	-1.1523	-0.81936	-1.18017	-0.9102	-0.85556	-1.52925	-0.63661	-0.40505	-0.24017	0.57983	0.24604	0.41202	1.10103	0.24656		1
1.5191	1.30878	1.12963	1.03449	1.10204	1.17422	0.97232	0.86755	0.83983	0.89081	0.97568	0.95566	1.11878	0.88693	0.94485	1.25647	-1.48266	-2.03471	-1.1523	-0.81936	-1.18017	-0.9102	-0.85556	-1.52925	-0.63661	-0.40505	-0.24017	-0.23767	0.24604	-0.38991	1.10103	1.04964		1
-0.9667	-1.20989	-1.34914	-0.72756	-1.43477	-1.35373	-0.80119	-0.8741	-0.99881	-0.91572	-0.7206	-0.73154	-0.48695	0.04834	0.14444	-0.26502	-1.48266	-0.50075	-0.46454	-0.81936	1.2933	-0.9102	-0.85556	0.39862	-0.63661	-0.40505	-0.24017	0.57983	0.24604	0.41202	-1.34411	-0.55652		1
0.6905	0.46923	0.30338	0.15346	0.25644	0.33157	0.08556	0.86755	0.83983	0.89081	0.97568	0.95566	1.11878	0.88693	0.94485	1.25647	-1.48266	-1.26773	-1.1523	-0.81936	0.67494	-0.9102	-0.85556	1.04124	-0.63661	-0.40505	-1.04207	-0.23767	-0.58944	-0.38991	1.10103	1.04964		1
1.5191	1.30878	0.30338	1.03449	1.10204	1.17422	0.08556	-0.8741	-0.99881	-0.01245	-1.56874	0.95566	0.31591	0.04834	-0.65598	-1.02576	-0.6465	-1.26773	-1.1523	-0.04922	1.2933	-0.9102	-0.13915	0.39862	-0.63661	-0.40505	-0.24017	-0.23767	0.24604	-0.38991	1.10103	0.24656		1
1.5191	1.30878	1.12963	1.03449	1.10204	1.17422	0.97232	0.86755	0.83983	0.89081	0.97568	0.95566	1.11878	0.88693	0.94485	1.25647	1.02581	-1.26773	-1.1523	-0.81936	-1.18017	-0.9102	-0.85556	-1.52925	-0.63661	-0.40505	-0.24017	0.57983	0.24604	0.41202	1.10103	1.04964		1
1.5191	1.30878	1.12963	1.03449	1.10204	1.17422	0.97232	-0.8741	0.83983	0.89081	0.97568	0.95566	1.11878	0.88693	0.94485	0.49572	1.02581	-1.26773	-1.1523	-0.81936	-1.18017	-0.9102	-0.85556	-1.52925	-0.63661	-0.40505	-0.24017	-0.23767	0.24604	-0.38991	-0.52907	-0.55652		1
-0.1381	-0.37033	0.30338	0.15346	-0.58917	0.33157	-0.80119	-0.8741	0.83983	-0.01245	0.12754	0.11206	0.31591	0.88693	0.94485	0.49572	0.18965	-1.26773	-0.46454	-0.81936	1.2933	-0.9102	-0.85556	1.04124	-0.63661	-0.40505	-0.24017	0.57983	0.24604	0.41202	-0.52907	0.24656		1
-0.1381	-0.37033	-1.34914	1.03449	-0.58917	-1.35373	0.97232	-0.00327	-0.07949	0.89081	-0.7206	0.95566	0.31591	0.04834	0.94485	-0.26502	1.02581	-1.26773	-1.1523	-0.81936	-1.18017	-0.9102	-0.85556	-1.52925	0.17882	1.18722	-0.24017	-0.23767	-0.58944	-0.38991	0.28598	0.24656		1
1.5191	1.30878	1.12963	1.03449	1.10204	1.17422	0.97232	0.86755	0.83983	0.89081	0.97568	0.95566	-0.48695	0.88693	0.14444	-1.02576	1.02581	-1.26773	-1.1523	-0.81936	-1.18017	-0.9102	-0.85556	-1.52925	-0.63661	-0.40505	-1.04207	-0.23767	-0.58944	-0.38991	1.10103	1.04964		1
1.5191	1.30878	1.12963	1.03449	1.10204	1.17422	0.97232	0.86755	0.83983	0.89081	0.97568	0.95566	1.11878	0.88693	0.94485	1.25647	1.02581	-2.03471	-1.1523	-0.81936	-1.18017	-0.9102	-0.85556	-1.52925	-0.63661	-0.40505	-0.24017	-0.23767	0.24604	-0.38991	1.10103	1.04964		1
-0.1381	-0.37033	-0.52288	-0.72756	-0.58917	-0.51108	-0.80119	-0.00327	-0.07949	-0.91572	0.12754	0.11206	-1.28981	0.04834	0.14444	-0.26502	0.18965	-2.03471	0.22322	-0.04922	-1.18017	-0.9102	-0.85556	-0.88663	-0.63661	-0.40505	-0.24017	0.57983	0.24604	0.41202	0.28598	0.24656		1
-0.1381	-1.20989	-0.52288	-0.72756	-0.58917	1.17422	0.97232	-0.8741	-0.99881	-0.91572	-0.7206	0.95566	1.11878	0.88693	-0.65598	-0.26502	1.02581	-2.03471	-1.1523	-0.81936	1.2933	-0.9102	-0.85556	1.04124	-0.63661	-0.40505	-0.24017	-0.23767	0.24604	-0.38991	-0.52907	-1.3596		1
-0.1381	-0.37033	-0.52288	0.15346	-0.58917	-0.51108	-0.80119	-0.8741	-0.07949	-0.91572	-0.7206	-0.73154	0.31591	0.04834	0.14444	-0.26502	0.18965	-0.50075	0.22322	0.72092	0.05657	0.53669	0.57725	0.39862	-0.63661	-0.40505	-0.24017	0.57983	0.24604	0.41202	-0.52907	-0.55652		1
-0.1381	-0.37033	0.30338	0.15346	0.25644	-0.51108	-0.80119	-0.00327	-0.07949	-0.01245	-0.7206	0.95566	1.11878	0.04834	0.14444	0.49572	1.02581	-1.26773	-0.46454	-0.81936	-1.18017	-0.18675	-0.85556	-0.244	0.17882	0.39108	0.56173	0.57983	0.24604	-0.38991	-0.52907	-0.55652		1
-0.9667	-1.20989	1.12963	1.03449	1.10204	1.17422	0.97232	-0.8741	0.83983	0.89081	0.97568	0.95566	1.11878	0.88693	0.94485	1.25647	1.02581	-1.26773	-1.1523	-0.81936	-1.18017	-0.9102	-0.85556	-1.52925	0.99426	1.18722	0.56173	-0.23767	-0.58944	-1.19183	-0.52907	-0.55652		1
-0.1381	-0.37033	-0.52288	-0.72756	-0.58917	-0.51108	-0.80119	-0.8741	0.83983	0.89081	0.97568	0.95566	1.11878	0.88693	0.94485	1.25647	1.02581	-1.26773	-1.1523	-0.81936	-1.18017	-0.9102	-0.85556	-1.52925	0.17882	0.39108	-0.24017	-0.23767	-1.42492	-0.38991	-0.52907	-0.55652		1
-0.9667	-0.37033	-0.52288	-0.72756	1.10204	1.17422	0.97232	-0.00327	0.83983	-0.91572	-0.7206	0.95566	1.11878	0.88693	0.94485	1.25647	1.02581	-1.26773	0.22322	-0.81936	0.67494	0.53669	0.57725	1.04124	-0.63661	-0.40505	-0.24017	-0.23767	-0.58944	-0.38991	0.28598	-0.55652		1
-0.1381	-0.37033	0.30338	-0.72756	-0.58917	0.33157	-0.80119	-0.8741	-0.99881	-0.91572	-0.7206	0.95566	-1.28981	0.88693	0.94485	-0.26502	1.02581	-1.26773	0.91098	-0.04922	-1.18017	0.53669	0.57725	-1.52925	0.17882	-0.40505	-0.24017	-0.23767	-0.58944	0.41202	0.28598	0.24656		1
-0.1381	0.46923	0.30338	0.15346	1.10204	1.17422	0.97232	-0.8741	-0.07949	-0.91572	-0.7206	-0.73154	-0.48695	-0.79025	-0.65598	-0.26502	-0.6465	-1.26773	1.59874	-0.81936	-1.18017	-0.9102	-0.85556	-1.52925	-2.26747	-1.99732	-1.84397	-1.87268	-2.2604	-0.38991	-0.52907	-0.55652		1
-1.7953	1.30878	1.12963	1.03449	1.10204	1.17422	0.97232	-0.00327	-0.07949	-0.01245	0.12754	-0.73154	-0.48695	-0.79025	-0.65598	-0.26502	-0.6465	-1.26773	-1.1523	-0.81936	-1.18017	-0.9102	-0.85556	-1.52925	0.17882	0.39108	0.56173	0.57983	0.24604	-0.38991	-0.52907	-0.55652		1
1.5191	1.30878	1.12963	1.03449	1.10204	1.17422	0.97232	-1.74492	-1.91812	-1.81898	-0.7206	-0.73154	-1.28981	-1.62883	0.14444	-1.02576	-0.6465	-2.03471	-0.46454	0.72092	0.67494	0.53669	-0.13915	-1.52925	-1.45204	-0.40505	0.56173	0.57983	0.24604	-0.38991	-0.52907	0.24656		1
-0.1381	-0.37033	1.12963	1.03449	1.10204	1.17422	0.97232	0.86755	0.83983	0.89081	0.97568	-0.73154	0.31591	0.88693	0.94485	-0.26502	1.02581	-2.03471	0.91098	-0.04922	-0.5618	-0.18675	-0.13915	1.04124	0.99426	-1.20118	-1.04207	-0.23767	0.24604	-0.38991	-1.34411	-0.55652		1
-0.1381	0.46923	-0.52288	-0.72756	-1.43477	-0.51108	-1.68794	-1.74492	0.83983	-0.91572	-0.7206	-0.73154	-0.48695	0.04834	-2.25682	-1.78651	-0.6465	-2.03471	1.59874	-0.81936	-1.18017	-0.9102	-0.85556	0.39862	-1.45204	-1.99732	-1.84397	-1.87268	0.24604	-1.19183	-1.34411	-2.16268		1
-0.1381	-0.37033	-0.52288	0.15346	-0.58917	-0.51108	0.08556	0.86755	-0.07949	-0.01245	-1.56874	0.11206	-0.48695	0.88693	0.94485	-0.26502	0.18965	-0.50075	0.22322	-0.81936	1.2933	-0.9102	-0.85556	0.39862	0.17882	-0.40505	0.56173	-0.23767	0.24604	0.41202	-0.52907	-0.55652		1
0.6905	-0.37033	-0.52288	0.15346	0.25644	-0.51108	0.97232	-0.00327	-0.07949	-0.91572	0.12754	-0.73154	-0.48695	0.04834	0.14444	-1.02576	0.18965	-1.26773	-1.1523	-0.81936	1.2933	-0.9102	-0.85556	0.39862	0.17882	0.39108	0.56173	-0.23767	0.24604	0.41202	-0.52907	0.24656		1
1.5191	1.30878	1.12963	1.03449	1.10204	1.17422	0.97232	-0.8741	-0.99881	-0.91572	0.97568	-1.57514	-0.48695	-0.79025	-0.65598	-1.78651	-2.31881	-1.26773	-1.1523	-0.81936	-1.18017	-0.9102	-0.85556	1.04124	0.99426	1.18722	-0.24017	-0.23767	-1.42492	-0.38991	-0.52907	-1.3596		1
-0.1381	-0.37033	-0.52288	0.15346	-0.58917	-0.51108	0.97232	-0.8741	-0.07949	-0.91572	0.97568	0.11206	-0.48695	0.88693	0.14444	-0.26502	1.02581	-1.26773	0.91098	-0.81936	1.2933	1.98358	2.01006	1.04124	0.99426	-0.40505	-0.24017	-0.23767	-0.58944	-0.38991	-0.52907	-0.55652		1
-0.1381	-0.37033	-1.34914	1.03449	-1.43477	-2.19638	-0.80119	-0.00327	-0.07949	-0.01245	0.12754	-0.73154	0.31591	-1.62883	-2.25682	-1.78651	-0.6465	-1.26773	-1.1523	-0.81936	-1.18017	-0.9102	-0.85556	1.04124	-0.63661	-1.20118	-0.24017	-0.23767	-0.58944	-0.38991	-0.52907	-0.55652		1
0.6905	1.30878	1.12963	1.03449	1.10204	0.33157	0.97232	-0.00327	-0.07949	0.89081	0.97568	-1.57514	-0.48695	-2.46742	-0.65598	-1.78651	-0.6465	-1.26773	0.91098	-0.04922	1.2933	0.53669	0.57725	1.04124	-0.63661	-1.20118	-1.84397	0.57983	-0.58944	-0.38991	-0.52907	0.24656		1
-0.1381	-0.37033	-0.52288	-1.60859	-0.58917	-0.51108	-0.80119	-0.8741	-1.91812	-0.91572	-0.7206	-1.57514	-1.28981	0.88693	-0.65598	-0.26502	-0.6465	-1.26773	-1.1523	-0.81936	-1.18017	-0.9102	-0.85556	-1.52925	-0.63661	-0.40505	-1.04207	-0.23767	-0.58944	-0.38991	1.10103	-0.55652		1
-0.1381	-0.37033	-0.52288	-0.72756	-0.58917	0.33157	-0.80119	-0.8741	-0.99881	-0.91572	0.12754	-0.73154	-0.48695	-0.79025	-0.65598	-0.26502	1.02581	-1.26773	0.22322	-0.04922	-0.5618	-0.18675	-0.13915	-0.88663	-0.63661	-0.40505	-0.24017	-0.23767	0.24604	-0.38991	-0.52907	-0.55652		1
0.6905	-0.37033	-0.52288	-0.72756	0.25644	0.33157	0.08556	-0.8741	-0.99881	-0.01245	0.12754	0.11206	0.31591	0.04834	0.14444	-0.26502	-0.6465	-2.03471	0.22322	0.72092	0.05657	0.53669	0.57725	-0.88663	-0.63661	-0.40505	-0.24017	0.57983	0.24604	0.41202	-0.52907	-0.55652		1
-0.9667	-1.20989	-1.34914	1.03449	0.25644	1.17422	0.08556	-0.8741	-0.99881	-0.91572	-0.7206	-0.73154	-0.48695	0.88693	0.94485	-0.26502	0.18965	-2.03471	0.22322	-0.81936	-0.5618	0.53669	-0.85556	-0.244	-0.63661	-0.40505	-0.24017	-0.23767	0.24604	0.41202	0.28598	-0.55652		1
1.5191	1.30878	1.12963	1.03449	1.10204	1.17422	0.97232	0.86755	0.83983	0.89081	0.97568	0.95566	1.11878	0.88693	0.94485	0.49572	1.02581	-2.03471	1.59874	-0.81936	1.2933	-0.9102	-0.85556	-0.244	0.99426	1.18722	0.56173	0.57983	1.08151	1.21394	-0.52907	-2.16268		1
-1.7953	-2.04944	-2.1754	-2.48962	1.10204	0.33157	0.08556	-0.8741	-0.99881	-1.81898	0.12754	-0.73154	0.31591	0.04834	0.14444	-1.02576	0.18965	-0.50075	0.91098	-0.81936	0.05657	-0.18675	1.29366	-0.244	-0.63661	-1.20118	-1.04207	-1.05518	-0.58944	-1.19183	-1.34411	0.24656		1
-1.7953	1.30878	-1.34914	1.03449	-1.43477	-0.51108	0.97232	0.86755	0.83983	0.89081	-2.41688	0.95566	1.11878	0.88693	0.94485	1.25647	1.02581	-1.26773	1.59874	-0.81936	0.05657	1.26013	-0.85556	-0.244	0.99426	-0.40505	-0.24017	0.57983	1.08151	-0.38991	1.10103	1.04964		1
0.6905	1.30878	0.30338	-0.72756	-1.43477	-0.51108	0.08556	-1.74492	-0.99881	-0.01245	0.97568	0.11206	-0.48695	0.04834	-0.65598	0.49572	-0.6465	-1.26773	-0.46454	0.72092	0.67494	1.98358	1.29366	-0.244	-1.45204	-0.40505	0.56173	1.39734	-0.58944	-1.19183	-0.52907	1.04964		1
-0.1381	-0.37033	-1.34914	-0.72756	-0.58917	-0.51108	0.97232	-1.74492	-0.99881	-0.91572	-0.7206	0.95566	1.11878	0.88693	0.94485	1.25647	1.02581	-1.26773	-1.1523	-0.81936	-1.18017	-0.9102	-0.85556	-0.244	-0.63661	-0.40505	-1.04207	-0.23767	-0.58944	-0.38991	-0.52907	-0.55652		1
-0.1381	-0.37033	-0.52288	-0.72756	0.25644	-0.51108	-0.80119	-0.8741	-0.99881	-0.01245	-0.7206	0.11206	-1.28981	0.04834	0.14444	-0.26502	0.18965	-1.26773	0.22322	-0.04922	-1.18017	-0.18675	-0.13915	-0.244	-0.63661	-0.40505	-0.24017	-0.23767	0.24604	-0.38991	-0.52907	-0.55652		1
-0.1381	-0.37033	-0.52288	0.15346	0.25644	0.33157	-0.80119	-0.8741	-0.07949	-0.01245	0.12754	-0.73154	-0.48695	0.04834	0.14444	0.49572	0.18965	-1.26773	0.91098	1.49107	0.67494	0.53669	0.57725	-0.244	-0.63661	-0.40505	-0.24017	0.57983	0.24604	0.41202	-0.52907	-0.55652		1
-0.1381	-0.37033	-1.34914	-0.72756	-0.58917	-0.51108	0.97232	-0.8741	-0.07949	-0.01245	0.12754	0.11206	-0.48695	0.88693	0.94485	-0.26502	1.02581	-1.26773	1.59874	1.49107	0.05657	-0.9102	-0.85556	1.04124	0.17882	-0.40505	0.56173	-0.23767	0.24604	1.21394	-0.52907	0.24656		1
-0.1381	-0.37033	-0.52288	-0.72756	0.25644	-0.51108	0.97232	-1.74492	-0.99881	-0.91572	-2.41688	-0.73154	-2.09268	0.88693	0.94485	-1.78651	-0.6465	-1.26773	1.59874	1.49107	0.05657	0.53669	0.57725	1.04124	-1.45204	1.18722	-1.84397	-0.23767	-0.58944	-0.38991	-0.52907	0.24656		1
-0.1381	-0.37033	-1.34914	-0.72756	-0.58917	-0.51108	0.97232	-0.00327	-0.07949	-0.91572	-0.7206	-0.73154	1.11878	0.88693	0.94485	-0.26502	1.02581	-2.03471	-0.46454	-0.04922	0.05657	-0.18675	-0.13915	0.39862	-0.63661	-1.20118	-1.04207	-0.23767	1.08151	-0.38991	0.28598	-0.55652		1
-0.1381	-0.37033	-0.52288	-0.72756	0.25644	-0.51108	-0.80119	-0.8741	-0.99881	-1.81898	-0.7206	0.95566	1.11878	0.88693	-0.65598	-0.26502	-0.6465	-2.03471	-1.1523	-0.81936	0.67494	-0.9102	-0.85556	1.04124	-0.63661	0.39108	-0.24017	-0.23767	-1.42492	-0.38991	-0.52907	-0.55652		1
-0.1381	-0.37033	-0.52288	0.15346	0.25644	0.33157	-0.80119	-0.8741	-0.99881	-0.91572	-0.7206	0.11206	0.31591	0.04834	0.14444	1.25647	1.02581	-2.03471	0.91098	2.26121	0.05657	0.53669	0.57725	1.04124	0.99426	-0.40505	-0.24017	-0.23767	-0.58944	-0.38991	0.28598	-0.55652		1
-0.1381	-0.37033	-0.52288	-0.72756	-0.58917	-0.51108	-0.80119	-0.8741	-0.99881	-0.91572	0.97568	-0.73154	-0.48695	0.04834	0.14444	-0.26502	0.18965	-0.50075	0.91098	1.49107	-0.5618	0.53669	0.57725	-0.88663	-0.63661	0.39108	-0.24017	-0.23767	-0.58944	0.41202	0.28598	0.24656		1
-0.1381	0.46923	1.12963	1.03449	-0.58917	0.33157	-0.80119	0.86755	-0.99881	-0.91572	-0.7206	0.11206	-0.48695	0.04834	-0.65598	-1.02576	-0.6465	-1.26773	0.91098	-0.04922	1.2933	1.26013	-0.85556	1.04124	-1.45204	-0.40505	-1.04207	-0.23767	-1.42492	0.41202	-0.52907	-0.55652		1
-0.1381	-0.37033	1.12963	1.03449	1.10204	1.17422	-0.80119	-0.8741	0.83983	-0.91572	0.97568	0.95566	-2.09268	-2.46742	-2.25682	-0.26502	-2.31881	-1.26773	-1.1523	-0.04922	0.67494	-0.9102	-0.13915	-0.244	-1.45204	-1.20118	-0.24017	0.57983	-1.42492	-1.19183	-0.52907	-0.55652		1
-0.1381	-0.37033	0.30338	0.15346	-0.58917	-0.51108	-0.80119	0.86755	0.83983	-0.91572	-0.7206	0.95566	1.11878	0.88693	0.94485	1.25647	1.02581	-1.26773	0.91098	-0.04922	1.2933	-0.9102	-0.85556	1.04124	0.99426	-1.20118	0.56173	-0.23767	-0.58944	0.41202	0.28598	-1.3596		1
-0.1381	1.30878	1.12963	1.03449	1.10204	1.17422	-0.80119	-0.8741	-0.99881	-0.91572	0.97568	0.95566	0.31591	0.88693	0.94485	1.25647	1.02581	-1.26773	0.91098	1.49107	0.05657	1.26013	0.57725	-0.244	0.99426	1.18722	1.36363	1.39734	-0.58944	-0.38991	-1.34411	-0.55652		1
-0.1381	-0.37033	-1.34914	-0.72756	-0.58917	-0.51108	0.08556	-0.00327	-0.99881	-0.91572	-0.7206	0.11206	0.31591	0.88693	0.94485	1.25647	1.02581	-1.26773	0.22322	0.72092	-0.5618	-0.9102	-0.85556	-0.244	0.99426	-1.99732	1.36363	1.39734	-0.58944	-0.38991	-0.52907	-0.55652		1
-0.1381	-0.37033	-0.52288	-0.72756	0.25644	-0.51108	0.08556	-0.00327	-0.07949	-0.01245	-0.7206	0.11206	-0.48695	-0.79025	-0.65598	-0.26502	-0.6465	-1.26773	-0.46454	-0.04922	0.67494	-0.18675	-0.13915	-0.244	-0.63661	-0.40505	-0.24017	-0.23767	-0.58944	-0.38991	-0.52907	0.24656		1
-0.1381	-0.37033	-0.52288	0.15346	0.25644	0.33157	-0.80119	-0.8741	-0.07949	-0.01245	0.12754	-0.73154	-0.48695	-0.79025	-0.65598	0.49572	-0.6465	-1.26773	-0.46454	-0.04922	-0.5618	-0.18675	-0.13915	-0.244	-0.63661	0.39108	1.36363	1.39734	-0.58944	0.41202	-0.52907	-0.55652		1
-0.9667	-0.37033	-0.52288	-0.72756	0.25644	1.17422	0.08556	0.86755	-0.07949	-0.91572	-0.7206	-1.57514	0.31591	0.88693	0.94485	-0.26502	0.18965	1.03321	-1.1523	-0.04922	-0.5618	-0.18675	-0.13915	-0.244	0.99426	0.39108	-0.24017	0.57983	1.08151	1.21394	0.28598	1.04964		1
-0.1381	-0.37033	0.30338	-0.72756	-1.43477	-1.35373	0.97232	-0.8741	-0.99881	-0.91572	-0.7206	-0.73154	-0.48695	0.88693	0.94485	0.49572	0.18965	-2.03471	0.22322	0.72092	-0.5618	0.53669	0.57725	0.39862	-0.63661	-0.40505	-0.24017	-1.05518	-0.58944	-0.38991	-0.52907	-0.55652		1
-0.1381	0.46923	0.30338	0.15346	-2.28038	-2.19638	0.97232	0.86755	0.83983	-0.91572	-0.7206	-2.41874	0.31591	0.88693	0.94485	1.25647	1.02581	-2.03471	0.22322	0.72092	0.67494	1.98358	2.01006	1.04124	0.99426	1.18722	-0.24017	-1.87268	1.08151	1.21394	0.28598	-0.55652		1
-0.1381	-0.37033	0.30338	0.15346	0.25644	0.33157	0.08556	0.86755	0.83983	0.89081	-0.7206	-1.57514	1.11878	0.88693	0.94485	0.49572	1.02581	-2.03471	0.22322	0.72092	0.05657	0.53669	0.57725	1.04124	-1.45204	-1.99732	-1.04207	-0.23767	-1.42492	-1.19183	-0.52907	1.04964		1
-0.9667	-2.04944	-1.34914	-0.72756	-1.43477	-1.35373	0.97232	-2.61574	-1.91812	-0.91572	-1.56874	-1.57514	1.11878	0.88693	0.94485	1.25647	1.02581	-0.50075	-0.46454	0.72092	0.05657	0.53669	0.57725	0.39862	-2.26747	-1.99732	-1.84397	-1.87268	-2.2604	-1.99375	1.10103	-1.3596		1
-1.7953	-2.04944	-2.1754	-2.48962	-2.28038	-2.19638	-0.80119	-2.61574	-2.83744	-2.72225	-2.41688	0.11206	1.11878	0.88693	0.94485	1.25647	1.02581	-1.26773	0.22322	0.72092	0.05657	0.53669	0.57725	-0.244	-1.45204	-1.99732	-1.04207	-0.23767	-1.42492	-1.19183	1.10103	-2.16268		1
-0.1381	0.46923	0.30338	0.15346	0.25644	0.33157	0.08556	-0.00327	-0.07949	-0.91572	0.12754	-1.57514	-0.48695	0.88693	0.94485	-0.26502	1.02581	-1.26773	0.22322	0.72092	0.67494	0.53669	0.57725	0.39862	-2.26747	-1.99732	-1.84397	-1.87268	-2.2604	-1.99375	0.28598	0.24656		1
-0.9667	-2.04944	-1.34914	-0.72756	-1.43477	-1.35373	0.97232	0.86755	0.83983	0.89081	0.97568	-2.41874	-0.48695	-0.79025	-0.65598	0.49572	0.18965	-1.26773	0.22322	-0.04922	0.05657	0.53669	0.57725	-0.244	-1.45204	-1.99732	-1.04207	-0.23767	-1.42492	-1.19183	1.10103	-0.55652		1
-1.7953	-2.04944	-2.1754	-2.48962	-2.28038	-2.19638	0.97232	-2.61574	-1.91812	-0.91572	-1.56874	0.95566	1.11878	-0.79025	0.94485	1.25647	1.02581	-1.26773	0.22322	0.72092	0.05657	0.53669	0.57725	-0.244	-2.26747	-1.99732	-1.84397	-1.87268	-2.2604	-1.99375	0.28598	-1.3596		1
-1.7953	-0.37033	-0.52288	-0.72756	-0.58917	-0.51108	-0.80119	-2.61574	-2.83744	-2.72225	-2.41688	0.11206	1.11878	0.88693	0.94485	1.25647	1.02581	-1.26773	1.59874	2.26121	0.05657	0.53669	0.57725	-0.244	-2.26747	-1.99732	-1.84397	-1.87268	-2.2604	-1.99375	0.28598	-2.16268		1
-0.9667	-2.04944	-1.34914	-0.72756	-1.43477	-1.35373	0.08556	0.86755	0.83983	0.89081	0.97568	-0.73154	-0.48695	0.88693	0.94485	-1.78651	-0.6465	-1.26773	0.22322	0.72092	1.2933	0.53669	0.57725	0.39862	-1.45204	-1.99732	-1.04207	-0.23767	-1.42492	-1.19183	0.28598	1.04964		1
-1.7953	-2.04944	-2.1754	-2.48962	-2.28038	-2.19638	-1.68794	0.86755	0.83983	0.89081	0.97568	-1.57514	0.31591	0.88693	0.94485	1.25647	1.02581	-1.26773	0.22322	-0.04922	0.05657	1.26013	1.29366	0.39862	-2.26747	-1.99732	-1.84397	-1.87268	-2.2604	-1.99375	0.28598	0.24656		1
-0.9667	-1.20989	-1.34914	-1.60859	-1.43477	-1.35373	-0.80119	-0.8741	-0.99881	-0.01245	0.12754	-0.73154	-0.48695	0.88693	0.94485	-1.78651	-0.6465	-0.50075	-0.46454	0.72092	-0.5618	-0.18675	0.57725	-0.88663	-1.45204	-1.99732	-1.04207	-0.23767	-1.42492	-1.19183	-0.52907	1.04964		1
-0.9667	-0.37033	-0.52288	-0.72756	-0.58917	-0.51108	-0.80119	-1.74492	-0.99881	-1.81898	-1.56874	-2.41874	1.11878	0.88693	0.94485	1.25647	1.02581	1.03321	0.22322	0.72092	0.05657	0.53669	0.57725	-0.244	-2.26747	-1.20118	-1.84397	-1.05518	-0.58944	-1.19183	-1.34411	-2.16268		1
-0.9667	-2.04944	-1.34914	-0.72756	-1.43477	-1.35373	0.97232	-2.61574	-2.83744	-2.72225	-2.41688	-1.57514	0.31591	0.88693	0.94485	1.25647	1.02581	1.03321	-0.46454	0.72092	-0.5618	-0.18675	0.57725	-0.244	-1.45204	-1.99732	-1.84397	-1.87268	-2.2604	-1.99375	-2.15916	-2.16268		1
-1.7953	-2.04944	-2.1754	-2.48962	-2.28038	-2.19638	0.97232	0.86755	0.83983	0.89081	0.97568	-1.57514	-0.48695	-0.79025	-0.65598	-0.26502	-0.6465	-2.03471	0.22322	0.72092	0.05657	0.53669	0.57725	-0.244	-2.26747	-1.99732	-1.84397	-1.87268	-2.2604	-1.99375	1.10103	1.04964		1
-0.9667	-1.20989	-0.52288	1.03449	0.25644	-0.51108	-0.80119	-1.74492	-2.83744	-1.81898	-0.7206	0.11206	-0.48695	-0.79025	-0.65598	-0.26502	-0.6465	-2.03471	0.22322	-0.04922	0.67494	0.53669	0.57725	0.39862	0.99426	1.18722	0.56173	1.39734	1.08151	0.41202	0.28598	1.04964		1
-1.7953	-2.04944	-1.34914	-0.72756	-1.43477	-1.35373	0.97232	-2.61574	-2.83744	-2.72225	-2.41688	-1.57514	-0.48695	-1.62883	-1.4564	-1.02576	-1.48266	-2.03471	0.22322	0.72092	0.05657	0.53669	0.57725	1.04124	-1.45204	-1.99732	-1.04207	-0.23767	-1.42492	-1.19183	-1.34411	-2.16268		1
-1.7953	-2.04944	-2.1754	-2.48962	-2.28038	-2.19638	0.08556	-2.61574	-2.83744	-2.72225	-2.41688	-2.41874	-1.28981	0.04834	0.14444	-0.26502	0.18965	-0.50075	-0.46454	-0.04922	-0.5618	-0.18675	-0.13915	-0.88663	-2.26747	-1.99732	-1.84397	-1.87268	-2.2604	-1.99375	-2.15916	-2.16268		1
-1.7953	-2.04944	-2.1754	-0.72756	-2.28038	-0.51108	-1.68794	-1.74492	-1.91812	-0.91572	-1.56874	0.95566	-0.48695	-1.62883	-1.4564	-1.78651	-2.31881	-1.26773	0.22322	0.72092	0.05657	0.53669	0.57725	-0.244	-1.45204	-0.40505	-0.24017	0.57983	-1.42492	-0.38991	-2.15916	-1.3596		1
-0.1381	1.30878	1.12963	1.03449	1.10204	1.17422	0.97232	0.86755	0.83983	0.89081	0.97568	0.11206	-1.28981	-1.62883	-1.4564	1.25647	-1.48266	-1.26773	0.22322	0.72092	0.05657	1.26013	0.57725	-0.244	-1.45204	-1.99732	-1.04207	-0.23767	-1.42492	-1.19183	0.28598	0.24656		1
-1.7953	-1.20989	-0.52288	-1.60859	-1.43477	0.33157	0.08556	0.86755	0.83983	-0.01245	-1.56874	-0.73154	-1.28981	-1.62883	-1.4564	-1.02576	-1.48266	-1.26773	0.91098	0.72092	0.05657	0.53669	0.57725	-0.244	-2.26747	-1.99732	-1.84397	-1.87268	-2.2604	-1.99375	0.28598	0.24656		1
-1.7953	-2.04944	-2.1754	-2.48962	-2.28038	-0.51108	-0.80119	0.86755	0.83983	0.89081	-2.41688	0.11206	0.31591	-1.62883	0.94485	-1.78651	-0.6465	-1.26773	0.91098	-0.04922	0.05657	1.26013	1.29366	1.04124	-0.63661	-1.20118	-0.24017	-0.23767	1.08151	-1.99375	1.10103	-0.55652		1
1.5191	-0.37033	0.30338	1.03449	-1.43477	-2.19638	0.08556	0.86755	0.83983	-0.91572	-0.7206	-1.57514	-1.28981	0.88693	0.94485	-1.02576	-1.48266	-1.26773	-0.46454	-0.04922	1.2933	1.26013	1.29366	1.04124	-1.45204	-1.20118	1.36363	1.39734	0.24604	0.41202	0.28598	1.04964		1
-0.9667	-2.04944	-1.34914	-0.72756	-1.43477	-1.35373	0.97232	-2.61574	-2.83744	-1.81898	-2.41688	-2.41874	-1.28981	-1.62883	-2.25682	-1.78651	-2.31881	-1.26773	1.59874	2.26121	1.2933	1.98358	2.01006	1.04124	-2.26747	-1.20118	-1.84397	-0.23767	-1.42492	-1.99375	-0.52907	1.04964		1
-1.7953	-2.04944	-2.1754	-2.48962	-2.28038	-2.19638	-0.80119	0.86755	0.83983	-0.01245	0.97568	0.95566	1.11878	0.88693	-1.4564	-0.26502	-1.48266	-1.26773	0.91098	1.49107	1.2933	-0.18675	1.29366	1.04124	-1.45204	-1.20118	-1.04207	-0.23767	1.08151	1.21394	1.10103	-1.3596		1
-1.7953	-1.20989	-0.52288	-1.60859	-1.43477	-0.51108	0.08556	-0.8741	-0.99881	-0.91572	-1.56874	0.11206	-0.48695	-0.79025	-1.4564	-0.26502	-2.31881	-0.50075	0.91098	0.72092	1.2933	0.53669	0.57725	1.04124	-1.45204	-1.99732	-1.04207	-0.23767	-1.42492	-1.19183	-0.52907	-1.3596		1
-0.9667	-2.04944	-2.1754	-2.48962	-2.28038	1.17422	0.97232	-2.61574	-1.91812	-0.91572	-1.56874	-0.73154	-1.28981	-0.79025	-1.4564	-0.26502	-2.31881	0.26623	0.91098	1.49107	0.67494	1.26013	0.57725	1.04124	-2.26747	-1.99732	-1.84397	-1.87268	-2.2604	-1.99375	-0.52907	-1.3596		1
-1.7953	-1.20989	-0.52288	-1.60859	-1.43477	-2.19638	0.97232	-2.61574	-2.83744	-2.72225	-2.41688	-0.73154	0.31591	0.04834	-1.4564	1.25647	-2.31881	-2.03471	0.91098	1.49107	0.67494	1.26013	1.29366	0.39862	-1.45204	-1.20118	0.56173	-1.87268	-2.2604	-1.99375	-2.15916	-2.16268		1
-1.7953	-2.04944	-2.1754	-2.48962	-2.28038	-1.35373	-1.68794	-0.00327	-0.07949	-0.01245	-2.41688	0.11206	-1.28981	-1.62883	-1.4564	-1.78651	-0.6465	-0.50075	0.91098	0.72092	0.67494	0.53669	1.29366	0.39862	-2.26747	-1.20118	-1.84397	-1.05518	-0.58944	-1.19183	-1.34411	1.04964		1
1.5191	-2.04944	-2.1754	-2.48962	-2.28038	-2.19638	-2.57469	-1.74492	-1.91812	0.89081	0.97568	-1.57514	-1.28981	-1.62883	-0.65598	-1.02576	-1.48266	-2.03471	0.91098	1.49107	-0.5618	-0.18675	1.29366	-0.244	-2.26747	-1.99732	-1.84397	-1.87268	-2.2604	-1.99375	-2.15916	-1.3596		1
1.5191	-1.20989	-2.1754	-1.60859	-0.58917	-1.35373	-1.68794	-1.74492	-0.99881	-1.81898	-1.56874	-1.57514	-1.28981	-1.62883	0.14444	-1.02576	-1.48266	1.03321	0.91098	1.49107	0.67494	1.26013	1.29366	0.39862	-2.26747	-0.40505	0.56173	0.57983	0.24604	-1.99375	-1.34411	-2.16268		1
-0.9667	-2.04944	-2.1754	-2.48962	-2.28038	-2.19638	-2.57469	-2.61574	-2.83744	-2.72225	-2.41688	-1.57514	-1.28981	0.04834	-2.25682	-1.02576	-1.48266	-2.03471	1.59874	2.26121	0.67494	1.98358	0.57725	0.39862	-2.26747	-1.20118	-1.04207	-1.05518	-1.42492	-1.19183	-2.15916	-2.16268		1
1.5191	-1.20989	-2.1754	-1.60859	-0.58917	-1.35373	-1.68794	0.86755	0.83983	0.89081	0.97568	0.95566	-1.28981	0.88693	-0.65598	-1.78651	-1.48266	-2.03471	-0.46454	-0.04922	-0.5618	-0.18675	-0.13915	0.39862	-1.45204	-1.99732	-1.04207	-1.05518	-1.42492	-1.19183	-1.34411	0.24656		1
-1.7953	-2.04944	-2.1754	-2.48962	-2.28038	-2.19638	-2.57469	-1.74492	-1.91812	-2.72225	-1.56874	-1.57514	-1.28981	-0.79025	-2.25682	-1.02576	-1.48266	-2.03471	-0.46454	0.72092	0.05657	-0.18675	1.29366	-0.88663	-2.26747	-1.20118	-1.04207	-1.05518	-2.2604	-1.19183	-1.34411	-2.16268		1
-1.7953	-0.37033	0.30338	-0.72756	-0.58917	-1.35373	-1.68794	-2.61574	-1.91812	-0.91572	-0.7206	-1.57514	-1.28981	-0.79025	-0.65598	-0.26502	-1.48266	-0.50075	0.91098	1.49107	0.67494	1.26013	1.29366	0.39862	-2.26747	-1.20118	-1.04207	-1.05518	-2.2604	-1.99375	-2.15916	-2.16268		1
-0.9667	-0.37033	-1.34914	-1.60859	-1.43477	-1.35373	-1.68794	-1.74492	-1.91812	-2.72225	-1.56874	-0.73154	-1.28981	-1.62883	-2.25682	-0.26502	-1.48266	-1.26773	1.59874	2.26121	0.67494	1.98358	0.57725	0.39862	-2.26747	-1.99732	-1.84397	-0.23767	-2.2604	-1.99375	-2.15916	-1.3596		1
-0.9667	-1.20989	-1.34914	0.15346	-1.43477	0.33157	-1.68794	-2.61574	-2.83744	-2.72225	-0.7206	-0.73154	-0.48695	-0.79025	-2.25682	-1.02576	-0.6465	-1.26773	0.91098	1.49107	0.67494	1.26013	1.29366	0.39862	-2.26747	-1.99732	-1.84397	-1.87268	-2.2604	-1.99375	-2.15916	-2.16268		1
-0.9667	-2.04944	0.30338	-2.48962	0.25644	-1.35373	-2.57469	-1.74492	-2.83744	-2.72225	-0.7206	-0.73154	0.31591	-1.62883	-2.25682	-1.02576	-1.48266	-1.26773	1.59874	2.26121	0.67494	1.98358	0.57725	0.39862	-1.45204	-1.20118	-1.84397	-1.87268	-1.42492	-1.19183	-2.15916	-2.16268		1
-0.9667	-1.20989	-1.34914	-1.60859	0.25644	0.33157	-1.68794	0.86755	0.83983	0.89081	-1.56874	-0.73154	-2.09268	-1.62883	-0.65598	-1.78651	0.18965	-1.26773	0.91098	1.49107	0.67494	1.26013	1.29366	0.39862	-1.45204	-1.20118	-1.84397	-1.05518	-1.42492	-1.99375	-0.52907	-2.16268		1
-0.9667	-1.20989	0.30338	0.15346	-1.43477	-0.51108	-1.68794	-0.8741	-1.91812	-1.81898	-0.7206	-1.57514	-0.48695	-1.62883	-1.4564	-1.02576	1.02581	-1.26773	0.22322	0.72092	0.67494	0.53669	0.57725	0.39862	-2.26747	-1.20118	-1.84397	-1.87268	-1.42492	-1.19183	-2.15916	-2.16268		1
-0.1381	-0.37033	-1.34914	-1.60859	-0.58917	-1.35373	-2.57469	-0.8741	-0.99881	-0.91572	-0.7206	-0.73154	-2.09268	-0.79025	-1.4564	-0.26502	-0.6465	-1.26773	0.91098	1.49107	0.67494	1.26013	1.29366	0.39862	-2.26747	-0.40505	-0.24017	-1.87268	-0.58944	0.41202	-0.52907	0.24656		1
-1.7953	-0.37033	-1.34914	-2.48962	-1.43477	-1.35373	-1.68794	-1.74492	-1.91812	-2.72225	-1.56874	-0.73154	-1.28981	-1.62883	-1.4564	-1.02576	-1.48266	-1.26773	1.59874	2.26121	0.67494	1.98358	0.57725	0.39862	-0.63661	-1.20118	-0.24017	-1.05518	-2.2604	-1.19183	-1.34411	-1.3596		1
-1.7953	1.30878	1.12963	-1.60859	1.10204	-2.19638	-1.68794	-1.74492	-2.83744	-1.81898	-2.41688	-0.73154	-2.09268	-1.62883	-1.4564	-1.02576	-1.48266	-1.26773	0.22322	-0.04922	0.67494	0.53669	0.57725	0.39862	-2.26747	-1.20118	-0.24017	-1.05518	-2.2604	-1.19183	-1.34411	-2.16268		1
-0.1381	-0.37033	-0.52288	-2.48962	-0.58917	-0.51108	-1.68794	-1.74492	-0.07949	-1.81898	0.12754	-0.73154	-2.09268	0.04834	0.14444	-0.26502	-1.48266	-0.50075	0.91098	1.49107	0.67494	1.26013	1.29366	0.39862	-0.63661	-0.40505	-0.24017	-1.05518	-0.58944	-1.19183	-1.34411	-1.3596		1
0.6905	0.46923	0.30338	0.15346	0.25644	0.33157	-1.68794	-1.74492	-0.99881	-0.91572	-0.7206	-1.57514	-2.09268	-0.79025	-0.65598	-1.02576	-1.48266	-1.26773	1.59874	2.26121	0.67494	1.98358	0.57725	0.39862	-2.26747	-1.20118	-1.04207	-1.05518	-2.2604	-1.19183	-2.15916	-1.3596		1
0.6905	-0.37033	-0.52288	-0.72756	-0.58917	0.33157	-1.68794	-0.00327	-0.07949	-0.91572	0.12754	-1.57514	-0.48695	-1.62883	-1.4564	-1.02576	-1.48266	-1.26773	0.91098	-0.04922	0.67494	0.53669	-0.13915	1.04124	-0.63661	-1.99732	-0.24017	-1.87268	-2.2604	-1.99375	-2.15916	-2.16268		1
-1.7953	1.30878	1.12963	1.03449	1.10204	1.17422	0.97232	0.86755	0.83983	0.89081	0.97568	0.95566	1.11878	0.88693	0.94485	-0.26502	1.02581	1.03321	0.22322	-0.81936	1.2933	0.53669	0.57725	1.04124	0.99426	1.18722	-0.24017	-0.23767	1.08151	0.41202	1.10103	-0.55652		0
0.6905	1.30878	1.12963	1.03449	1.10204	1.17422	0.97232	0.86755	0.83983	0.89081	0.97568	0.95566	1.11878	0.88693	0.94485	1.25647	1.02581	1.03321	0.22322	-0.04922	-0.5618	-0.18675	-0.13915	-0.244	0.99426	1.18722	0.56173	0.57983	0.24604	0.41202	1.10103	1.04964		0
0.6905	0.46923	0.30338	0.15346	1.10204	1.17422	0.97232	-0.00327	0.83983	-0.01245	0.12754	-0.73154	-0.48695	0.88693	-0.65598	-1.02576	-0.6465	0.26623	-0.46454	-0.81936	-1.18017	-0.9102	-0.85556	0.39862	0.17882	-0.40505	-1.04207	-0.23767	0.24604	-0.38991	0.28598	-0.55652		0
0.6905	1.30878	1.12963	1.03449	1.10204	1.17422	0.97232	-0.8741	0.83983	0.89081	-1.56874	0.95566	0.31591	0.88693	0.94485	1.25647	1.02581	1.03321	-0.46454	-0.81936	-1.18017	-0.9102	0.57725	1.04124	-0.63661	1.18722	-0.24017	-0.23767	1.08151	1.21394	0.28598	1.04964		0
-0.1381	-0.37033	0.30338	1.03449	-0.58917	1.17422	0.97232	0.86755	0.83983	-0.91572	-1.56874	0.95566	1.11878	0.88693	0.94485	-1.02576	1.02581	1.03321	1.59874	-0.81936	-1.18017	-0.9102	-0.85556	1.04124	-0.63661	0.39108	1.36363	0.57983	1.08151	1.21394	0.28598	1.04964		0
1.5191	1.30878	1.12963	1.03449	1.10204	0.33157	0.97232	0.86755	0.83983	0.89081	0.12754	0.95566	0.31591	0.88693	0.94485	0.49572	1.02581	1.03321	-1.1523	-0.81936	-1.18017	-0.9102	-0.85556	-0.88663	0.99426	1.18722	1.36363	0.57983	1.08151	1.21394	1.10103	1.04964		0
1.5191	1.30878	1.12963	1.03449	1.10204	1.17422	0.97232	0.86755	0.83983	0.89081	0.97568	0.95566	1.11878	0.88693	0.94485	1.25647	1.02581	1.03321	0.22322	-0.81936	-1.18017	0.53669	-0.85556	0.39862	0.99426	1.18722	1.36363	0.57983	1.08151	1.21394	1.10103	1.04964		0
1.5191	1.30878	1.12963	1.03449	1.10204	0.33157	0.97232	0.86755	0.83983	0.89081	-2.41688	0.95566	-0.48695	0.88693	-0.65598	0.49572	1.02581	1.03321	-0.46454	-0.81936	1.2933	-0.9102	-0.85556	-1.52925	0.99426	-0.40505	-0.24017	0.57983	1.08151	0.41202	-0.52907	1.04964		0
1.5191	1.30878	1.12963	1.03449	1.10204	1.17422	0.97232	0.86755	0.83983	0.89081	-2.41688	0.95566	1.11878	0.88693	0.94485	1.25647	1.02581	1.03321	-1.1523	-0.81936	-1.18017	-0.9102	-0.85556	-1.52925	0.99426	1.18722	1.36363	1.39734	1.08151	1.21394	1.10103	1.04964		0
-0.1381	1.30878	1.12963	1.03449	1.10204	1.17422	0.97232	0.86755	0.83983	0.89081	0.97568	0.95566	1.11878	0.88693	0.94485	1.25647	1.02581	1.03321	-1.1523	-0.81936	1.2933	-0.9102	-0.85556	-0.244	0.99426	1.18722	1.36363	1.39734	1.08151	1.21394	1.10103	1.04964		0
1.5191	1.30878	1.12963	1.03449	1.10204	1.17422	0.97232	0.86755	0.83983	0.89081	0.97568	0.95566	1.11878	0.88693	0.94485	1.25647	1.02581	1.03321	-1.1523	-0.81936	-1.18017	-0.9102	-0.85556	-1.52925	0.99426	1.18722	1.36363	1.39734	1.08151	1.21394	1.10103	1.04964		0
-0.9667	-1.20989	-0.52288	-0.72756	-0.58917	-0.51108	0.97232	0.86755	0.83983	0.89081	0.97568	0.95566	0.31591	0.88693	0.94485	1.25647	1.02581	0.26623	-0.46454	-0.81936	-0.5618	-0.18675	-0.13915	1.04124	0.17882	0.39108	0.56173	0.57983	0.24604	0.41202	0.28598	0.24656		0
0.6905	-0.37033	0.30338	0.15346	-0.58917	0.33157	0.97232	0.86755	0.83983	-0.01245	-0.7206	0.95566	0.31591	0.04834	0.14444	0.49572	-0.6465	1.03321	-1.1523	-0.81936	-0.5618	-0.9102	-0.85556	-1.52925	0.17882	-0.40505	0.56173	0.57983	1.08151	1.21394	1.10103	0.24656		0
0.6905	0.46923	1.12963	1.03449	1.10204	1.17422	0.97232	0.86755	0.83983	0.89081	0.97568	0.95566	1.11878	0.88693	0.94485	1.25647	1.02581	1.03321	-1.1523	-0.81936	-1.18017	-0.9102	-0.85556	-1.52925	0.99426	1.18722	1.36363	1.39734	1.08151	1.21394	1.10103	1.04964		0
1.5191	1.30878	1.12963	1.03449	1.10204	1.17422	0.97232	0.86755	0.83983	0.89081	0.97568	0.95566	1.11878	0.88693	0.94485	0.49572	1.02581	1.03321	-1.1523	-0.81936	-1.18017	-0.9102	-0.85556	-1.52925	0.99426	0.39108	0.56173	-0.23767	1.08151	1.21394	1.10103	1.04964		0
-0.1381	-0.37033	-0.52288	-0.72756	-0.58917	-0.51108	-0.80119	0.86755	0.83983	-0.01245	0.12754	0.95566	1.11878	0.88693	0.94485	1.25647	1.02581	1.03321	1.59874	2.26121	-1.18017	0.53669	-0.85556	1.04124	0.99426	1.18722	0.56173	-0.23767	1.08151	1.21394	1.10103	1.04964		0
-0.1381	1.30878	0.30338	-0.72756	1.10204	-1.35373	0.97232	-0.00327	0.83983	-0.01245	0.12754	0.95566	1.11878	0.88693	0.94485	-0.26502	1.02581	1.03321	0.91098	-0.81936	1.2933	-0.18675	-0.13915	1.04124	0.99426	1.18722	-0.24017	0.57983	1.08151	-0.38991	1.10103	-0.55652		0
-0.1381	-0.37033	-0.52288	-0.72756	-0.58917	-0.51108	-0.80119	0.86755	0.83983	0.89081	0.97568	0.95566	1.11878	0.88693	0.94485	-0.26502	1.02581	1.03321	0.22322	0.72092	-1.18017	-0.9102	-0.85556	-1.52925	0.99426	1.18722	0.56173	1.39734	1.08151	0.41202	1.10103	1.04964		0
-0.1381	-1.20989	-0.52288	-0.72756	-1.43477	-0.51108	-0.80119	-0.00327	-0.07949	-0.01245	0.12754	-0.73154	-0.48695	0.88693	0.94485	0.49572	-0.6465	-0.50075	0.22322	-0.04922	1.2933	-0.18675	-0.85556	-0.244	0.17882	0.39108	0.56173	0.57983	0.24604	-0.38991	-0.52907	-0.55652		0
-0.1381	-0.37033	-0.52288	0.15346	0.25644	-0.51108	0.08556	-0.00327	-0.07949	-0.01245	0.12754	0.11206	0.31591	0.04834	-0.65598	-0.26502	0.18965	0.26623	-0.46454	-0.04922	-1.18017	-0.9102	-0.85556	-0.88663	0.17882	-0.40505	0.56173	0.57983	-0.58944	-0.38991	0.28598	0.24656		0
1.5191	1.30878	1.12963	1.03449	1.10204	1.17422	0.97232	-0.8741	-0.99881	-0.91572	-0.7206	0.11206	-0.48695	0.88693	0.94485	1.25647	1.02581	0.26623	0.22322	-0.81936	1.2933	-0.9102	-0.85556	1.04124	0.99426	1.18722	0.56173	1.39734	1.08151	1.21394	1.10103	1.04964		0
-1.7953	-2.04944	-2.1754	-2.48962	-2.28038	-2.19638	-2.57469	-0.8741	-0.99881	-0.91572	-0.7206	-2.41874	-2.09268	0.88693	0.94485	-0.26502	1.02581	1.03321	0.22322	0.72092	-1.18017	0.53669	0.57725	0.39862	-0.63661	-0.40505	-1.04207	0.57983	0.24604	0.41202	0.28598	0.24656		0
-0.1381	-0.37033	-0.52288	-0.72756	-0.58917	-0.51108	-0.80119	-0.8741	-0.07949	-0.91572	-0.7206	0.95566	0.31591	0.88693	0.94485	0.49572	1.02581	0.26623	0.22322	-0.81936	0.05657	-0.18675	-0.13915	-0.244	0.17882	-0.40505	1.36363	0.57983	-0.58944	-1.19183	-0.52907	0.24656		0
0.6905	0.46923	0.30338	0.15346	0.25644	0.33157	-0.80119	-0.8741	-0.99881	-0.91572	-0.7206	0.11206	-1.28981	-1.62883	-1.4564	-1.02576	-0.6465	-0.50075	0.22322	-0.04922	-1.18017	-0.9102	-0.85556	0.39862	0.17882	-0.40505	-1.04207	-1.05518	-0.58944	-0.38991	-0.52907	-0.55652		0
0.6905	0.46923	-1.34914	0.15346	0.25644	-0.51108	0.08556	0.86755	0.83983	0.89081	0.97568	-0.73154	-0.48695	0.88693	0.94485	1.25647	1.02581	1.03321	1.59874	2.26121	1.2933	1.98358	0.57725	1.04124	0.99426	1.18722	-0.24017	-0.23767	1.08151	1.21394	0.28598	-0.55652		0
1.5191	1.30878	1.12963	1.03449	0.25644	1.17422	0.97232	0.86755	0.83983	0.89081	0.12754	0.95566	0.31591	0.88693	0.14444	-0.26502	-0.6465	1.03321	-1.1523	-0.81936	-1.18017	-0.9102	-0.85556	-0.88663	0.17882	0.39108	0.56173	1.39734	0.24604	-0.38991	1.10103	1.04964		0
1.5191	1.30878	1.12963	1.03449	1.10204	-0.51108	0.97232	0.86755	0.83983	0.89081	0.97568	-1.57514	1.11878	0.88693	0.94485	1.25647	1.02581	1.03321	-1.1523	-0.81936	0.05657	-0.9102	-0.85556	-1.52925	0.99426	1.18722	1.36363	1.39734	1.08151	0.41202	1.10103	1.04964		0
-0.1381	-0.37033	-0.52288	-0.72756	-0.58917	-0.51108	-0.80119	-0.00327	-0.07949	-0.01245	-0.7206	-0.73154	-0.48695	-0.79025	-0.65598	-0.26502	-0.6465	-0.50075	-0.46454	0.72092	0.67494	-0.18675	-0.85556	1.04124	0.17882	0.39108	0.56173	0.57983	0.24604	0.41202	-1.34411	0.24656		0
-0.1381	1.30878	1.12963	1.03449	1.10204	1.17422	0.97232	0.86755	0.83983	0.89081	0.97568	0.95566	0.31591	0.04834	0.14444	-0.26502	0.18965	1.03321	-1.1523	-0.81936	-1.18017	-0.9102	-0.85556	-1.52925	0.17882	0.39108	0.56173	1.39734	0.24604	1.21394	1.10103	1.04964		0
-0.1381	-0.37033	0.30338	0.15346	0.25644	0.33157	0.08556	-0.00327	0.83983	0.89081	0.12754	0.95566	0.31591	0.04834	0.14444	0.49572	0.18965	0.26623	-0.46454	-0.81936	-1.18017	-0.9102	-0.85556	-1.52925	0.99426	1.18722	1.36363	0.57983	1.08151	0.41202	0.28598	0.24656		0
1.5191	1.30878	1.12963	1.03449	1.10204	1.17422	0.97232	0.86755	0.83983	0.89081	0.97568	0.95566	1.11878	0.88693	0.94485	0.49572	1.02581	1.03321	-0.46454	-0.81936	0.05657	-0.9102	-0.85556	1.04124	0.99426	1.18722	1.36363	1.39734	1.08151	1.21394	-0.52907	1.04964		0
1.5191	1.30878	1.12963	1.03449	1.10204	1.17422	0.97232	0.86755	0.83983	0.89081	0.97568	0.95566	1.11878	0.88693	0.94485	1.25647	1.02581	1.03321	0.91098	0.72092	-1.18017	-0.18675	-0.13915	-0.88663	0.99426	1.18722	1.36363	1.39734	1.08151	1.21394	1.10103	1.04964		0
-0.1381	-0.37033	-0.52288	-0.72756	-0.58917	-0.51108	-0.80119	0.86755	0.83983	0.89081	0.97568	0.95566	0.31591	0.88693	0.94485	1.25647	1.02581	1.03321	-1.1523	-0.81936	0.05657	-0.9102	-0.85556	1.04124	0.99426	1.18722	1.36363	1.39734	1.08151	1.21394	1.10103	1.04964		0
0.6905	1.30878	1.12963	1.03449	1.10204	1.17422	0.97232	0.86755	0.83983	0.89081	0.97568	0.95566	1.11878	0.88693	0.94485	-0.26502	-0.6465	0.26623	-1.1523	-0.81936	-1.18017	-0.9102	-0.85556	-1.52925	0.99426	1.18722	1.36363	1.39734	1.08151	0.41202	1.10103	0.24656		0
-0.1381	-0.37033	-1.34914	-0.72756	-0.58917	-1.35373	-0.80119	-0.00327	-0.07949	-0.01245	0.97568	0.11206	0.31591	-0.79025	-0.65598	-0.26502	0.18965	0.26623	0.22322	-0.04922	-0.5618	-0.18675	0.57725	0.39862	-0.63661	0.39108	0.56173	0.57983	-0.58944	1.21394	1.10103	1.04964		0
-0.1381	1.30878	1.12963	1.03449	1.10204	0.33157	0.97232	-0.8741	0.83983	-0.91572	-0.7206	0.11206	-0.48695	-0.79025	-0.65598	-0.26502	-0.6465	-0.50075	0.22322	0.72092	0.05657	0.53669	0.57725	1.04124	0.99426	1.18722	-0.24017	-0.23767	0.24604	-0.38991	-0.52907	-1.3596		0
0.6905	-0.37033	1.12963	-0.72756	0.25644	-0.51108	0.08556	0.86755	0.83983	0.89081	0.97568	0.95566	1.11878	0.88693	0.94485	0.49572	1.02581	1.03321	-1.1523	-0.81936	1.2933	-0.9102	-0.85556	1.04124	0.99426	0.39108	1.36363	0.57983	1.08151	0.41202	0.28598	0.24656		0
-1.7953	-0.37033	1.12963	1.03449	1.10204	1.17422	0.97232	0.86755	0.83983	0.89081	0.97568	0.95566	1.11878	0.88693	0.94485	1.25647	1.02581	1.03321	0.91098	0.72092	1.2933	0.53669	0.57725	1.04124	-0.63661	-0.40505	0.56173	0.57983	1.08151	-0.38991	1.10103	1.04964		0
0.6905	0.46923	0.30338	0.15346	0.25644	0.33157	0.08556	0.86755	0.83983	0.89081	0.97568	0.95566	-0.48695	0.04834	-0.65598	-0.26502	-0.6465	-0.50075	-1.1523	-0.81936	-1.18017	-0.9102	-0.85556	-1.52925	0.99426	1.18722	1.36363	0.57983	1.08151	1.21394	-0.52907	0.24656		0
-0.9667	-1.20989	-2.1754	-0.72756	-0.58917	-0.51108	-0.80119	-0.8741	-0.07949	-2.72225	-1.56874	-0.73154	1.11878	0.88693	0.94485	1.25647	-0.6465	1.03321	1.59874	-0.81936	-0.5618	-0.9102	-0.85556	1.04124	0.17882	-0.40505	-0.24017	-1.05518	1.08151	0.41202	-0.52907	-0.55652		0
-0.1381	-0.37033	-0.52288	-0.72756	-0.58917	-0.51108	-0.80119	-0.00327	-0.07949	-0.91572	0.12754	0.11206	0.31591	0.04834	-0.65598	-0.26502	1.02581	0.26623	-1.1523	-0.81936	-1.18017	-0.9102	-0.85556	-1.52925	0.17882	1.18722	1.36363	0.57983	0.24604	-0.38991	0.28598	0.24656		0
-0.1381	0.46923	-1.34914	-0.72756	0.25644	-0.51108	0.08556	0.86755	0.83983	0.89081	0.97568	0.95566	-1.28981	-1.62883	-1.4564	0.49572	-0.6465	0.26623	0.91098	0.72092	0.05657	-0.18675	-0.85556	-1.52925	0.17882	0.39108	0.56173	1.39734	1.08151	1.21394	0.28598	1.04964		0
-0.1381	0.46923	-0.52288	0.15346	-0.58917	-0.51108	-0.80119	-0.00327	-0.07949	-0.01245	-0.7206	0.95566	1.11878	0.04834	0.14444	-0.26502	0.18965	0.26623	0.22322	1.49107	0.67494	0.53669	0.57725	0.39862	0.99426	-0.40505	-0.24017	-0.23767	-0.58944	-0.38991	-0.52907	0.24656		0
-0.1381	-1.20989	-0.52288	-1.60859	-1.43477	-1.35373	-1.68794	0.86755	0.83983	0.89081	0.97568	0.95566	1.11878	0.88693	0.94485	-0.26502	1.02581	1.03321	-1.1523	-0.81936	1.2933	-0.18675	-0.85556	1.04124	0.99426	1.18722	0.56173	1.39734	-0.58944	1.21394	1.10103	1.04964		0
1.5191	1.30878	1.12963	1.03449	1.10204	1.17422	0.97232	0.86755	0.83983	0.89081	0.97568	0.95566	0.31591	0.88693	0.94485	1.25647	1.02581	1.03321	-1.1523	-0.81936	-1.18017	-0.9102	-0.85556	1.04124	0.99426	-0.40505	-0.24017	-0.23767	1.08151	0.41202	1.10103	1.04964		0
0.6905	0.46923	0.30338	0.15346	-0.58917	0.33157	0.08556	-0.00327	-0.07949	-0.91572	-0.7206	0.11206	-0.48695	-0.79025	-0.65598	-0.26502	0.18965	0.26623	-1.1523	-0.81936	-1.18017	-0.9102	-0.85556	-1.52925	-0.63661	-0.40505	-0.24017	-0.23767	-0.58944	-0.38991	0.28598	1.04964		0
-0.1381	-0.37033	-0.52288	-0.72756	-0.58917	-0.51108	-0.80119	-0.8741	-0.99881	-0.91572	-0.7206	-0.73154	-0.48695	0.88693	0.94485	-0.26502	1.02581	1.03321	0.91098	0.72092	1.2933	-0.18675	-0.85556	0.39862	-0.63661	-0.40505	-1.04207	-1.05518	-0.58944	-1.19183	-0.52907	-0.55652		0
-0.1381	-0.37033	-2.1754	-0.72756	-0.58917	-1.35373	0.08556	-1.74492	-1.91812	-1.81898	-2.41688	0.11206	0.31591	0.04834	0.14444	0.49572	-1.48266	-0.50075	0.22322	-0.04922	0.05657	0.53669	0.57725	1.04124	0.17882	0.39108	0.56173	0.57983	-0.58944	-1.19183	0.28598	0.24656		0
1.5191	1.30878	1.12963	1.03449	1.10204	1.17422	0.97232	-0.00327	0.83983	0.89081	0.97568	0.95566	0.31591	0.88693	0.94485	0.49572	1.02581	1.03321	-1.1523	-0.81936	-1.18017	-0.9102	-0.85556	-1.52925	0.17882	0.39108	0.56173	0.57983	1.08151	0.41202	1.10103	0.24656		0
-0.1381	-0.37033	-0.52288	0.15346	-0.58917	-0.51108	-0.80119	-0.00327	-0.07949	-0.01245	0.12754	0.11206	0.31591	0.04834	-0.65598	0.49572	0.18965	0.26623	0.22322	-0.04922	-0.5618	0.53669	0.57725	0.39862	0.17882	0.39108	-0.24017	-0.23767	-0.58944	-0.38991	-0.52907	-0.55652		0
-0.1381	-0.37033	0.30338	0.15346	-0.58917	-0.51108	-0.80119	-0.8741	-0.99881	-0.91572	-0.7206	0.11206	-0.48695	-0.79025	-0.65598	-0.26502	0.18965	-0.50075	0.22322	0.72092	0.05657	0.53669	0.57725	0.39862	-0.63661	-0.40505	-0.24017	-0.23767	0.24604	-0.38991	-0.52907	-0.55652		0
1.5191	1.30878	1.12963	1.03449	1.10204	1.17422	0.97232	-0.00327	-0.07949	0.89081	0.97568	0.11206	1.11878	0.88693	0.94485	-1.02576	1.02581	1.03321	0.91098	-0.81936	-1.18017	-0.9102	-0.85556	-0.244	-1.45204	0.39108	-1.04207	-0.23767	1.08151	1.21394	1.10103	1.04964		0
-0.9667	-1.20989	1.12963	0.15346	-2.28038	-1.35373	0.08556	0.86755	0.83983	0.89081	0.97568	0.95566	1.11878	0.88693	0.94485	0.49572	1.02581	1.03321	-1.1523	-0.81936	-1.18017	-0.9102	-0.85556	1.04124	0.99426	1.18722	0.56173	-1.05518	1.08151	1.21394	1.10103	1.04964		0
0.6905	1.30878	1.12963	1.03449	1.10204	1.17422	0.97232	0.86755	0.83983	0.89081	0.97568	0.11206	-0.48695	0.04834	0.94485	1.25647	1.02581	1.03321	-1.1523	-0.81936	-1.18017	-0.9102	-0.85556	-1.52925	0.99426	1.18722	1.36363	1.39734	1.08151	1.21394	1.10103	1.04964		0
-0.1381	-0.37033	-0.52288	-0.72756	-0.58917	-0.51108	-0.80119	-0.8741	-0.99881	-0.01245	-0.7206	-0.73154	-0.48695	-0.79025	-0.65598	-0.26502	-0.6465	-0.50075	0.91098	1.49107	0.67494	0.53669	0.57725	0.39862	-0.63661	-0.40505	0.56173	-1.05518	-0.58944	-0.38991	-0.52907	1.04964		0
0.6905	0.46923	1.12963	1.03449	0.25644	0.33157	0.08556	-0.00327	0.83983	0.89081	0.97568	0.11206	0.31591	0.88693	0.94485	-1.02576	-0.6465	1.03321	0.91098	-0.81936	0.05657	-0.9102	-0.85556	1.04124	0.99426	0.39108	0.56173	0.57983	1.08151	1.21394	0.28598	1.04964		0
-0.1381	-1.20989	-0.52288	0.15346	0.25644	0.33157	0.08556	-0.8741	-0.99881	-0.91572	-0.7206	-0.73154	-1.28981	0.88693	0.94485	-1.02576	1.02581	1.03321	1.59874	2.26121	1.2933	1.98358	2.01006	1.04124	-0.63661	-0.40505	-0.24017	-0.23767	0.24604	-0.38991	-0.52907	-0.55652		0
1.5191	1.30878	1.12963	1.03449	1.10204	1.17422	0.97232	0.86755	0.83983	-0.01245	-0.7206	0.95566	1.11878	0.88693	0.94485	1.25647	1.02581	1.03321	-1.1523	-0.81936	-0.5618	-0.9102	-0.85556	0.39862	0.17882	0.39108	1.36363	0.57983	0.24604	0.41202	0.28598	1.04964		0
-0.1381	-0.37033	-0.52288	-0.72756	-0.58917	-0.51108	-0.80119	-0.00327	-0.07949	-0.01245	0.12754	-0.73154	-0.48695	-0.79025	-0.65598	-0.26502	-0.6465	0.26623	0.22322	-0.81936	1.2933	0.53669	-0.13915	0.39862	0.17882	0.39108	0.56173	0.57983	0.24604	0.41202	0.28598	0.24656		0
0.6905	1.30878	1.12963	1.03449	1.10204	1.17422	0.97232	-0.00327	0.83983	0.89081	0.97568	0.11206	1.11878	-0.79025	0.94485	-0.26502	0.18965	0.26623	0.22322	-0.81936	1.2933	0.53669	-0.85556	0.39862	0.99426	0.39108	1.36363	-0.23767	1.08151	-0.38991	1.10103	0.24656		0
0.6905	-1.20989	-1.34914	-1.60859	-2.28038	-1.35373	-1.68794	0.86755	0.83983	0.89081	0.97568	0.95566	1.11878	0.88693	0.94485	0.49572	1.02581	1.03321	-1.1523	-0.81936	-1.18017	-0.9102	-0.85556	1.04124	0.99426	1.18722	0.56173	1.39734	0.24604	0.41202	-0.52907	1.04964		0
-1.7953	-0.37033	0.30338	-0.72756	-0.58917	-0.51108	0.97232	-0.8741	-0.07949	-0.01245	-0.7206	0.11206	-0.48695	0.88693	-0.65598	0.49572	0.18965	1.03321	0.22322	0.72092	-0.5618	-0.18675	-0.13915	0.39862	0.17882	-0.40505	-0.24017	-1.05518	0.24604	0.41202	-0.52907	-0.55652		0
1.5191	1.30878	1.12963	1.03449	1.10204	1.17422	0.97232	0.86755	0.83983	0.89081	0.97568	0.95566	1.11878	-0.79025	-0.65598	-0.26502	-0.6465	-0.50075	-1.1523	-0.81936	-1.18017	-0.9102	-0.85556	-1.52925	0.99426	1.18722	1.36363	1.39734	1.08151	1.21394	1.10103	1.04964		0
1.5191	1.30878	-0.52288	1.03449	1.10204	1.17422	0.97232	0.86755	0.83983	0.89081	0.97568	0.95566	0.31591	-0.79025	0.14444	-0.26502	0.18965	1.03321	-1.1523	-0.04922	-1.18017	-0.9102	-0.85556	-1.52925	-1.45204	1.18722	1.36363	1.39734	1.08151	1.21394	1.10103	1.04964		0
0.6905	0.46923	0.30338	0.15346	0.25644	-0.51108	0.08556	-0.00327	0.83983	-0.01245	0.12754	0.11206	1.11878	0.88693	0.14444	1.25647	0.18965	1.03321	0.91098	-0.04922	0.67494	-0.18675	-0.13915	0.39862	0.99426	1.18722	0.56173	-0.23767	-0.58944	-1.19183	-0.52907	0.24656		0
1.5191	0.46923	1.12963	1.03449	1.10204	1.17422	0.97232	-0.8741	-0.07949	-0.01245	0.12754	0.95566	1.11878	0.88693	0.94485	-0.26502	0.18965	0.26623	0.22322	-0.04922	-1.18017	0.53669	-0.85556	1.04124	0.99426	-0.40505	-0.24017	-0.23767	0.24604	-0.38991	1.10103	-1.3596		0
0.6905	0.46923	0.30338	0.15346	0.25644	0.33157	0.08556	0.86755	0.83983	0.89081	0.97568	0.95566	0.31591	0.88693	0.94485	0.49572	1.02581	1.03321	-1.1523	-0.81936	-1.18017	-0.9102	-0.85556	-0.244	0.99426	1.18722	-0.24017	-0.23767	0.24604	-0.38991	-1.34411	-2.16268		0
-1.7953	-2.04944	-2.1754	-2.48962	-2.28038	-2.19638	-2.57469	-2.61574	0.83983	0.89081	0.97568	-2.41874	1.11878	0.04834	0.94485	1.25647	0.18965	1.03321	0.22322	-0.81936	1.2933	0.53669	-0.85556	1.04124	0.17882	0.39108	0.56173	-0.23767	1.08151	-0.38991	1.10103	1.04964		0
-1.7953	-0.37033	1.12963	1.03449	1.10204	1.17422	0.97232	0.86755	0.83983	0.89081	0.97568	0.95566	1.11878	0.88693	0.94485	1.25647	1.02581	1.03321	0.91098	-0.81936	-1.18017	-0.9102	-0.85556	1.04124	0.99426	1.18722	1.36363	-0.23767	1.08151	1.21394	1.10103	1.04964		0
-0.9667	-0.37033	-0.52288	-0.72756	-0.58917	-0.51108	-0.80119	-0.8741	-0.99881	-0.01245	-0.7206	0.11206	0.31591	0.04834	-0.65598	-0.26502	0.18965	-0.50075	1.59874	0.72092	0.67494	1.26013	0.57725	0.39862	0.99426	-0.40505	-0.24017	-1.05518	0.24604	-1.19183	-1.34411	-0.55652		0
-0.1381	-0.37033	-0.52288	-0.72756	-0.58917	-0.51108	-0.80119	-0.8741	-0.99881	-0.91572	-0.7206	0.11206	-0.48695	0.04834	0.14444	0.49572	-1.48266	-0.50075	-1.1523	0.72092	-1.18017	0.53669	-0.13915	-1.52925	-0.63661	-0.40505	-0.24017	0.57983	-0.58944	-0.38991	-0.52907	0.24656		0
-0.1381	-0.37033	-0.52288	-0.72756	-0.58917	-0.51108	-0.80119	-0.8741	-0.99881	-0.91572	-0.7206	0.95566	-0.48695	0.04834	0.14444	-1.02576	-1.48266	-0.50075	0.22322	-0.81936	0.67494	-0.9102	-0.85556	1.04124	-0.63661	-0.40505	-0.24017	0.57983	-0.58944	-0.38991	-0.52907	1.04964		0
1.5191	1.30878	1.12963	1.03449	1.10204	1.17422	0.97232	0.86755	0.83983	0.89081	0.97568	0.95566	-0.48695	0.88693	0.94485	1.25647	1.02581	1.03321	-1.1523	-0.81936	1.2933	-0.9102	-0.85556	1.04124	0.99426	-0.40505	0.56173	-0.23767	1.08151	1.21394	1.10103	0.24656		0
-0.1381	0.46923	-0.52288	0.15346	0.25644	-0.51108	-0.80119	0.86755	0.83983	0.89081	0.97568	-0.73154	0.31591	0.04834	0.14444	-1.02576	0.18965	0.26623	0.22322	-0.04922	0.67494	0.53669	0.57725	1.04124	0.17882	0.39108	-0.24017	-0.23767	0.24604	0.41202	-0.52907	1.04964		0
-0.1381	-0.37033	1.12963	-0.72756	-0.58917	-0.51108	0.97232	0.86755	0.83983	-0.91572	-0.7206	0.95566	1.11878	0.88693	0.94485	1.25647	1.02581	0.26623	1.59874	-0.81936	1.2933	-0.9102	-0.85556	0.39862	0.17882	1.18722	0.56173	0.57983	-0.58944	0.41202	1.10103	1.04964		0
-1.7953	0.46923	0.30338	0.15346	0.25644	0.33157	0.97232	0.86755	0.83983	-0.01245	-0.7206	0.11206	1.11878	0.88693	0.94485	-0.26502	1.02581	1.03321	0.91098	-0.04922	-1.18017	1.26013	-0.13915	1.04124	0.99426	-0.40505	1.36363	1.39734	-0.58944	0.41202	0.28598	1.04964		0
0.6905	0.46923	0.30338	1.03449	1.10204	1.17422	0.97232	0.86755	0.83983	0.89081	0.97568	0.95566	1.11878	0.88693	0.94485	1.25647	1.02581	1.03321	-1.1523	-0.81936	-1.18017	-0.9102	-0.85556	-1.52925	0.99426	0.39108	1.36363	0.57983	0.24604	1.21394	0.28598	0.24656		0
-0.1381	-2.04944	1.12963	-2.48962	-2.28038	-2.19638	0.97232	-2.61574	0.83983	-2.72225	-2.41688	0.11206	0.31591	0.88693	0.94485	1.25647	1.02581	1.03321	0.91098	-0.04922	-1.18017	-0.9102	-0.85556	1.04124	-0.63661	-1.20118	-0.24017	-0.23767	1.08151	1.21394	-1.34411	-0.55652		0
0.6905	0.46923	1.12963	1.03449	1.10204	1.17422	0.97232	-0.00327	0.83983	0.89081	0.97568	0.95566	0.31591	0.04834	0.14444	0.49572	1.02581	0.26623	-1.1523	-0.81936	-1.18017	-0.9102	-0.85556	-1.52925	0.99426	1.18722	1.36363	1.39734	1.08151	1.21394	1.10103	1.04964		0
-0.1381	0.46923	1.12963	1.03449	1.10204	-0.51108	0.08556	0.86755	0.83983	0.89081	0.12754	0.95566	1.11878	0.88693	0.94485	1.25647	0.18965	-0.50075	-1.1523	-0.81936	0.05657	-0.9102	-0.85556	1.04124	0.99426	1.18722	1.36363	0.57983	-0.58944	1.21394	1.10103	1.04964		0
0.6905	0.46923	0.30338	1.03449	1.10204	0.33157	0.97232	-0.00327	-0.07949	-0.01245	0.12754	0.11206	-0.48695	0.04834	0.14444	-0.26502	0.18965	1.03321	-0.46454	-0.04922	0.67494	-0.18675	-0.13915	0.39862	0.17882	-0.40505	-1.04207	-0.23767	0.24604	-0.38991	-0.52907	-0.55652		0
-0.1381	-0.37033	-0.52288	0.15346	-0.58917	0.33157	-0.80119	0.86755	0.83983	0.89081	0.97568	0.95566	-0.48695	0.04834	0.14444	0.49572	1.02581	1.03321	-1.1523	-0.81936	-1.18017	-0.9102	-0.85556	-1.52925	0.99426	1.18722	1.36363	1.39734	1.08151	1.21394	1.10103	1.04964		0
1.5191	1.30878	1.12963	1.03449	1.10204	1.17422	0.97232	0.86755	0.83983	0.89081	0.97568	0.11206	0.31591	0.88693	0.94485	-0.26502	0.18965	0.26623	0.22322	-0.81936	0.05657	-0.18675	-0.13915	-0.88663	0.17882	0.39108	-0.24017	-0.23767	-0.58944	0.41202	-0.52907	0.24656		0
-0.1381	-1.20989	-0.52288	-1.60859	-0.58917	-0.51108	-1.68794	-0.8741	-0.99881	-0.91572	-0.7206	0.11206	-1.28981	-1.62883	-1.4564	-1.02576	-1.48266	-1.26773	0.22322	0.72092	0.05657	-0.18675	-0.13915	-0.244	-1.45204	-1.20118	-0.24017	0.57983	-1.42492	-1.19183	-0.52907	-0.55652		0
0.6905	-0.37033	-0.52288	1.03449	-0.58917	-0.51108	-0.80119	-0.8741	-0.99881	-0.91572	-0.7206	0.11206	-0.48695	0.88693	0.94485	-0.26502	1.02581	1.03321	1.59874	-0.81936	1.2933	-0.9102	1.29366	1.04124	0.99426	-0.40505	-0.24017	0.57983	0.24604	-0.38991	-0.52907	1.04964		0
-0.9667	-0.37033	-1.34914	0.15346	-0.58917	-0.51108	-0.80119	0.86755	0.83983	0.89081	0.97568	-0.73154	-0.48695	-0.79025	0.14444	1.25647	-0.6465	0.26623	-0.46454	-0.81936	-1.18017	-0.18675	-0.85556	-1.52925	0.99426	1.18722	1.36363	1.39734	1.08151	0.41202	-0.52907	1.04964		0
-0.1381	0.46923	-0.52288	0.15346	-0.58917	-0.51108	-0.80119	-0.8741	-0.07949	-0.01245	-0.7206	-0.73154	-0.48695	-0.79025	-0.65598	-1.02576	-0.6465	0.26623	0.22322	0.72092	0.05657	0.53669	0.57725	0.39862	-0.63661	-0.40505	-0.24017	-0.23767	-0.58944	0.41202	0.28598	0.24656		0
1.5191	1.30878	1.12963	1.03449	1.10204	1.17422	0.97232	0.86755	0.83983	0.89081	0.97568	0.95566	1.11878	0.88693	0.94485	1.25647	1.02581	1.03321	0.91098	-0.81936	0.67494	-0.9102	1.29366	0.39862	0.99426	1.18722	1.36363	1.39734	1.08151	0.41202	1.10103	1.04964		0
1.5191	1.30878	1.12963	1.03449	1.10204	0.33157	0.97232	0.86755	0.83983	0.89081	0.97568	0.11206	0.31591	0.04834	0.14444	0.49572	0.18965	0.26623	0.22322	0.72092	-1.18017	-0.9102	-0.13915	-1.52925	0.17882	0.39108	1.36363	-0.23767	0.24604	0.41202	-0.52907	-0.55652		0
1.5191	1.30878	1.12963	1.03449	1.10204	1.17422	0.97232	0.86755	0.83983	0.89081	0.97568	0.95566	1.11878	0.88693	0.94485	1.25647	1.02581	1.03321	-1.1523	-0.81936	1.2933	-0.9102	-0.85556	1.04124	0.99426	1.18722	1.36363	1.39734	1.08151	1.21394	1.10103	1.04964		0
0.6905	-0.37033	1.12963	0.15346	1.10204	0.33157	0.97232	0.86755	0.83983	0.89081	0.97568	0.95566	1.11878	0.88693	0.94485	0.49572	1.02581	1.03321	-1.1523	-0.81936	1.2933	1.98358	0.57725	1.04124	0.99426	0.39108	-0.24017	-0.23767	1.08151	0.41202	1.10103	1.04964		0
-0.9667	0.46923	0.30338	1.03449	1.10204	-0.51108	0.97232	0.86755	0.83983	0.89081	0.97568	0.11206	-0.48695	0.88693	0.94485	-0.26502	1.02581	1.03321	0.22322	-0.81936	-1.18017	-0.9102	-0.85556	-0.88663	0.99426	1.18722	0.56173	1.39734	0.24604	1.21394	0.28598	0.24656		0
-0.1381	0.46923	0.30338	-1.60859	-0.58917	-0.51108	-0.80119	-0.8741	-0.99881	-0.01245	0.12754	-0.73154	-1.28981	0.04834	0.94485	0.49572	-1.48266	-1.26773	0.22322	0.72092	-1.18017	-0.9102	1.29366	-0.244	-1.45204	-0.40505	-0.24017	-0.23767	-0.58944	0.41202	0.28598	-0.55652		0
0.6905	0.46923	-0.52288	0.15346	0.25644	0.33157	0.08556	-0.8741	-0.07949	-0.01245	-0.7206	-0.73154	-0.48695	0.88693	0.94485	-0.26502	0.18965	0.26623	1.59874	1.49107	1.2933	1.98358	2.01006	1.04124	-0.63661	-0.40505	-1.04207	-1.05518	-0.58944	-0.38991	-0.52907	-0.55652		0
-0.1381	1.30878	1.12963	1.03449	1.10204	1.17422	0.97232	0.86755	0.83983	0.89081	0.97568	0.95566	1.11878	-0.79025	-0.65598	-0.26502	-0.6465	-0.50075	-1.1523	-0.81936	1.2933	-0.9102	-0.85556	1.04124	-0.63661	-0.40505	1.36363	-0.23767	1.08151	1.21394	1.10103	1.04964		0
0.6905	1.30878	1.12963	1.03449	1.10204	1.17422	0.97232	-0.00327	-0.07949	-0.91572	-0.7206	-0.73154	-0.48695	-0.79025	-0.65598	-1.02576	-0.6465	-0.50075	0.22322	-0.04922	1.2933	-0.18675	-0.13915	-0.244	-0.63661	-0.40505	-0.24017	-0.23767	-0.58944	-1.19183	-1.34411	-1.3596		0
-0.1381	-0.37033	1.12963	1.03449	0.25644	0.33157	0.08556	0.86755	0.83983	0.89081	0.97568	0.95566	1.11878	-0.79025	-0.65598	0.49572	-0.6465	0.26623	-1.1523	-0.81936	-1.18017	-0.9102	-0.85556	1.04124	0.17882	1.18722	1.36363	-0.23767	1.08151	1.21394	1.10103	1.04964		0
-0.1381	0.46923	1.12963	-0.72756	-0.58917	-0.51108	0.08556	-0.8741	-0.07949	0.89081	-0.7206	0.95566	0.31591	-0.79025	-0.65598	0.49572	-0.6465	1.03321	1.59874	-0.04922	-0.5618	-0.9102	-0.85556	1.04124	0.99426	0.39108	-0.24017	-0.23767	-1.42492	-0.38991	0.28598	-0.55652		0
-0.1381	-0.37033	-1.34914	-0.72756	-0.58917	-0.51108	0.08556	-0.00327	-0.07949	-0.01245	-0.7206	-0.73154	-0.48695	0.04834	0.14444	-0.26502	-0.6465	0.26623	1.59874	1.49107	1.2933	1.26013	1.29366	1.04124	-1.45204	-1.20118	-0.24017	-1.05518	-1.42492	-1.19183	-1.34411	-1.3596		0
1.5191	1.30878	1.12963	1.03449	1.10204	1.17422	0.97232	0.86755	0.83983	0.89081	0.97568	0.95566	1.11878	0.88693	0.94485	1.25647	1.02581	1.03321	-1.1523	-0.81936	1.2933	-0.9102	-0.85556	1.04124	0.99426	1.18722	1.36363	1.39734	1.08151	1.21394	1.10103	1.04964		0
1.5191	1.30878	1.12963	1.03449	1.10204	1.17422	0.97232	0.86755	0.83983	0.89081	0.97568	0.95566	1.11878	0.88693	0.94485	-1.02576	1.02581	0.26623	-0.46454	-0.81936	0.67494	-0.9102	-0.85556	-0.88663	0.99426	1.18722	1.36363	0.57983	1.08151	0.41202	1.10103	1.04964		0
-0.1381	-0.37033	-1.34914	0.15346	-0.58917	0.33157	-1.68794	0.86755	0.83983	0.89081	0.97568	0.95566	1.11878	0.88693	0.94485	-0.26502	-1.48266	-0.50075	-1.1523	-0.81936	-1.18017	-0.9102	-0.85556	0.39862	0.99426	1.18722	1.36363	0.57983	1.08151	1.21394	1.10103	1.04964		0
-0.1381	0.46923	0.30338	1.03449	1.10204	1.17422	0.97232	0.86755	0.83983	0.89081	0.97568	0.95566	1.11878	0.88693	0.94485	0.49572	1.02581	1.03321	-1.1523	-0.81936	-1.18017	-0.9102	-0.85556	0.39862	0.99426	1.18722	-0.24017	-0.23767	1.08151	1.21394	1.10103	1.04964		0
-0.1381	-0.37033	0.30338	0.15346	0.25644	0.33157	0.08556	0.86755	0.83983	-0.01245	0.12754	0.95566	1.11878	-0.79025	0.14444	-0.26502	-0.6465	0.26623	-0.46454	-0.04922	-1.18017	0.53669	-0.13915	1.04124	0.99426	0.39108	1.36363	1.39734	-0.58944	0.41202	-0.52907	1.04964		0
-0.1381	-0.37033	-0.52288	-0.72756	-0.58917	-0.51108	-0.80119	-0.00327	-0.07949	-0.01245	0.12754	0.11206	-0.48695	0.04834	0.14444	-0.26502	0.18965	0.26623	0.91098	-0.04922	-0.5618	-0.18675	-0.85556	0.39862	0.17882	0.39108	-0.24017	0.57983	-0.58944	-0.38991	0.28598	0.24656		0
-0.1381	-0.37033	-0.52288	0.15346	0.25644	0.33157	0.08556	-0.00327	-0.07949	-0.91572	0.12754	0.95566	0.31591	-0.79025	-0.65598	-0.26502	0.18965	-0.50075	1.59874	0.72092	1.2933	0.53669	0.57725	1.04124	0.99426	0.39108	-0.24017	-0.23767	-0.58944	-0.38991	-1.34411	-0.55652		0
-0.1381	-1.20989	1.12963	0.15346	-1.43477	-1.35373	-1.68794	0.86755	0.83983	0.89081	0.97568	0.11206	0.31591	0.88693	0.94485	0.49572	1.02581	-0.50075	0.91098	-0.81936	1.2933	-0.9102	0.57725	1.04124	-0.63661	-0.40505	-1.04207	-1.05518	-1.42492	-1.19183	-0.52907	0.24656		0
-0.1381	-2.04944	-0.52288	-0.72756	-2.28038	-2.19638	-2.57469	-0.00327	-0.07949	-0.01245	-0.7206	0.11206	0.31591	0.04834	0.14444	0.49572	0.18965	0.26623	-1.1523	-0.81936	0.67494	1.26013	0.57725	1.04124	0.99426	1.18722	-1.04207	-1.05518	1.08151	1.21394	-1.34411	1.04964		0
-0.1381	1.30878	1.12963	1.03449	1.10204	1.17422	0.97232	0.86755	0.83983	0.89081	0.97568	0.95566	1.11878	0.88693	0.94485	1.25647	1.02581	1.03321	-1.1523	-0.81936	-1.18017	-0.9102	-0.85556	-1.52925	0.99426	1.18722	1.36363	1.39734	1.08151	1.21394	1.10103	1.04964		0
0.6905	0.46923	0.30338	0.15346	0.25644	0.33157	0.08556	0.86755	-0.07949	-0.01245	0.12754	0.11206	1.11878	0.04834	0.14444	0.49572	1.02581	0.26623	-1.1523	-0.81936	-0.5618	-0.9102	-0.85556	-0.244	0.17882	0.39108	0.56173	0.57983	-1.42492	0.41202	0.28598	0.24656		0
0.6905	1.30878	1.12963	0.15346	-0.58917	0.33157	0.97232	0.86755	-0.07949	0.89081	0.97568	0.95566	-1.28981	0.04834	0.94485	1.25647	1.02581	1.03321	0.22322	-0.04922	1.2933	-0.9102	-0.85556	0.39862	0.17882	0.39108	1.36363	-0.23767	1.08151	1.21394	1.10103	1.04964		0
-1.7953	-2.04944	-2.1754	-0.72756	-1.43477	-1.35373	-1.68794	-0.00327	-0.99881	-0.91572	-0.7206	0.11206	-0.48695	-0.79025	-0.65598	0.49572	-1.48266	-1.26773	0.91098	0.72092	1.2933	0.53669	0.57725	1.04124	-0.63661	-0.40505	-0.24017	1.39734	0.24604	-1.19183	-1.34411	-1.3596		0
-0.1381	-0.37033	-0.52288	-0.72756	-0.58917	-0.51108	-0.80119	-0.00327	-0.07949	-0.01245	0.12754	0.11206	0.31591	0.88693	0.14444	-1.02576	-0.6465	0.26623	-0.46454	-0.04922	-1.18017	-0.18675	-0.13915	0.39862	0.17882	1.18722	-0.24017	-1.05518	-0.58944	-1.19183	0.28598	-0.55652		0
-0.1381	1.30878	1.12963	1.03449	-0.58917	-0.51108	0.08556	0.86755	0.83983	0.89081	0.97568	0.95566	0.31591	0.88693	0.94485	0.49572	1.02581	1.03321	-0.46454	-0.81936	1.2933	-0.9102	-0.85556	1.04124	0.99426	-1.20118	-1.04207	-0.23767	1.08151	-1.19183	1.10103	1.04964		0
0.6905	0.46923	-0.52288	0.15346	-0.58917	1.17422	0.08556	-0.00327	-0.07949	-0.01245	0.12754	0.11206	0.31591	-0.79025	0.14444	-0.26502	0.18965	-0.50075	1.59874	2.26121	0.67494	1.98358	2.01006	1.04124	0.17882	0.39108	-0.24017	-1.05518	-0.58944	0.41202	1.10103	-0.55652		0
1.5191	1.30878	1.12963	1.03449	1.10204	0.33157	0.08556	-0.00327	-0.07949	-0.01245	0.97568	0.95566	1.11878	0.88693	0.94485	0.49572	1.02581	1.03321	-1.1523	-0.81936	-0.5618	-0.9102	-0.85556	-0.88663	0.99426	0.39108	0.56173	0.57983	0.24604	1.21394	1.10103	1.04964		0
-0.1381	-0.37033	-0.52288	-0.72756	-0.58917	0.33157	0.97232	0.86755	0.83983	0.89081	0.97568	0.95566	1.11878	0.88693	0.94485	1.25647	1.02581	1.03321	0.22322	-0.81936	0.05657	-0.9102	-0.85556	1.04124	0.99426	1.18722	1.36363	-0.23767	1.08151	1.21394	1.10103	1.04964		0
-0.1381	0.46923	-0.52288	0.15346	0.25644	-0.51108	0.97232	-0.8741	-0.07949	-0.01245	-0.7206	0.11206	0.31591	0.04834	0.14444	0.49572	0.18965	0.26623	0.22322	0.72092	0.05657	1.26013	1.29366	1.04124	-0.63661	-0.40505	-0.24017	-0.23767	0.24604	0.41202	0.28598	0.24656		0
-0.1381	-0.37033	0.30338	-0.72756	-0.58917	-0.51108	0.08556	-0.00327	-0.99881	-0.91572	-0.7206	0.95566	-0.48695	0.88693	0.14444	-1.02576	1.02581	1.03321	0.91098	0.72092	1.2933	0.53669	0.57725	1.04124	0.17882	-0.40505	-1.04207	-1.05518	-0.58944	-1.19183	-0.52907	-1.3596		0
-1.7953	-0.37033	-0.52288	-0.72756	-0.58917	1.17422	0.97232	0.86755	0.83983	0.89081	0.97568	0.95566	1.11878	0.88693	0.94485	1.25647	1.02581	1.03321	1.59874	0.72092	1.2933	0.53669	-0.13915	1.04124	0.99426	1.18722	-0.24017	-0.23767	1.08151	1.21394	1.10103	0.24656		0
0.6905	0.46923	0.30338	0.15346	1.10204	1.17422	0.97232	-0.00327	0.83983	-0.01245	0.12754	0.95566	1.11878	0.88693	0.94485	1.25647	1.02581	1.03321	-1.1523	-0.81936	-1.18017	-0.9102	-0.85556	-1.52925	0.99426	1.18722	1.36363	1.39734	1.08151	1.21394	1.10103	1.04964		0
0.6905	0.46923	0.30338	0.15346	0.25644	0.33157	0.08556	-0.00327	-0.07949	-0.01245	0.12754	0.11206	0.31591	0.04834	0.14444	0.49572	0.18965	0.26623	-0.46454	-0.04922	-0.5618	-0.18675	-0.13915	-0.88663	0.17882	0.39108	0.56173	0.57983	0.24604	0.41202	0.28598	0.24656		0
-0.1381	-0.37033	-0.52288	-0.72756	-0.58917	-0.51108	0.08556	-0.00327	-0.07949	-0.01245	0.97568	0.11206	0.31591	0.88693	0.94485	1.25647	1.02581	1.03321	-0.46454	-0.81936	0.05657	-0.9102	-0.85556	-0.88663	0.99426	0.39108	0.56173	0.57983	1.08151	0.41202	-0.52907	1.04964		0
1.5191	1.30878	1.12963	1.03449	0.25644	0.33157	0.08556	0.86755	0.83983	0.89081	0.12754	0.95566	1.11878	0.88693	0.94485	-0.26502	1.02581	0.26623	-0.46454	0.72092	1.2933	1.26013	-0.13915	1.04124	0.99426	1.18722	0.56173	0.57983	1.08151	-0.38991	0.28598	0.24656		0
-0.9667	-0.37033	-0.52288	1.03449	1.10204	1.17422	0.97232	-0.00327	0.83983	-0.01245	0.12754	0.11206	1.11878	0.04834	0.94485	0.49572	0.18965	1.03321	-1.1523	-0.81936	-1.18017	-0.9102	0.57725	-0.88663	-0.63661	-0.40505	-1.04207	-1.05518	-1.42492	-1.19183	0.28598	1.04964		0
-0.1381	0.46923	1.12963	1.03449	0.25644	0.33157	0.97232	0.86755	0.83983	0.89081	0.12754	0.11206	-1.28981	0.04834	0.14444	0.49572	0.18965	0.26623	0.22322	-0.81936	1.2933	-0.9102	-0.85556	0.39862	0.17882	1.18722	1.36363	1.39734	1.08151	0.41202	1.10103	1.04964		0
-0.1381	-0.37033	-0.52288	-0.72756	-1.43477	-1.35373	-0.80119	0.86755	0.83983	0.89081	0.97568	0.95566	-2.09268	0.88693	0.94485	1.25647	1.02581	1.03321	-0.46454	-0.81936	-1.18017	-0.9102	-0.85556	-0.244	0.99426	0.39108	1.36363	-0.23767	1.08151	1.21394	1.10103	-0.55652		0
0.6905	1.30878	1.12963	1.03449	1.10204	1.17422	0.97232	0.86755	0.83983	0.89081	0.97568	0.95566	1.11878	0.88693	0.94485	1.25647	1.02581	1.03321	-1.1523	-0.81936	-1.18017	-0.9102	-0.85556	-1.52925	0.99426	1.18722	1.36363	1.39734	1.08151	1.21394	1.10103	1.04964		0
1.5191	-0.37033	-0.52288	1.03449	1.10204	1.17422	-0.80119	-2.61574	-2.83744	-2.72225	-2.41688	-0.73154	-2.09268	0.88693	0.94485	-1.78651	-0.6465	1.03321	-0.46454	-0.81936	-1.18017	-0.9102	-0.85556	1.04124	0.17882	1.18722	0.56173	-1.05518	1.08151	-0.38991	-0.52907	-2.16268		0
0.6905	0.46923	-0.52288	0.15346	-0.58917	0.33157	0.08556	-0.00327	-0.07949	-0.01245	0.12754	0.11206	0.31591	0.04834	0.14444	1.25647	0.18965	0.26623	-0.46454	-0.04922	-0.5618	-0.18675	-0.13915	-0.88663	0.17882	0.39108	0.56173	0.57983	0.24604	0.41202	0.28598	0.24656		0
-0.1381	-0.37033	0.30338	-0.72756	-0.58917	-0.51108	-0.80119	0.86755	0.83983	0.89081	0.97568	0.11206	1.11878	0.88693	0.94485	1.25647	1.02581	1.03321	1.59874	2.26121	1.2933	-0.9102	-0.85556	1.04124	-0.63661	1.18722	1.36363	1.39734	1.08151	1.21394	1.10103	1.04964		0
-0.1381	-0.37033	-0.52288	-0.72756	-0.58917	-0.51108	-0.80119	0.86755	0.83983	0.89081	0.97568	0.95566	1.11878	0.88693	0.94485	-0.26502	1.02581	1.03321	-0.46454	-0.81936	1.2933	0.53669	-0.13915	1.04124	0.99426	0.39108	-0.24017	-0.23767	1.08151	1.21394	0.28598	1.04964		0
-0.1381	0.46923	-0.52288	0.15346	-0.58917	0.33157	-0.80119	-0.8741	-0.07949	-0.91572	0.12754	-0.73154	0.31591	-0.79025	0.14444	-0.26502	0.18965	-0.50075	0.22322	1.49107	0.05657	1.26013	0.57725	0.39862	-0.63661	-0.40505	-0.24017	-0.23767	-0.58944	-0.38991	-0.52907	-0.55652		0
-1.7953	-2.04944	1.12963	1.03449	1.10204	1.17422	0.97232	0.86755	0.83983	0.89081	0.97568	0.95566	1.11878	0.88693	0.94485	1.25647	1.02581	1.03321	-1.1523	-0.81936	-1.18017	-0.9102	-0.85556	-1.52925	0.99426	1.18722	1.36363	1.39734	1.08151	1.21394	1.10103	1.04964		0
-0.1381	1.30878	1.12963	1.03449	1.10204	1.17422	0.97232	0.86755	0.83983	0.89081	0.97568	0.95566	-0.48695	0.04834	0.94485	-0.26502	1.02581	1.03321	1.59874	2.26121	1.2933	1.98358	2.01006	1.04124	0.99426	-1.20118	-1.04207	-1.87268	-0.58944	0.41202	1.10103	0.24656		0
1.5191	1.30878	1.12963	1.03449	1.10204	1.17422	0.97232	0.86755	0.83983	0.89081	0.97568	0.95566	0.31591	0.04834	0.14444	-0.26502	0.18965	0.26623	-1.1523	-0.81936	-0.5618	-0.9102	-0.85556	-1.52925	0.99426	1.18722	1.36363	1.39734	1.08151	-0.38991	1.10103	1.04964		0
-0.1381	-0.37033	0.30338	0.15346	0.25644	0.33157	0.08556	0.86755	0.83983	0.89081	0.97568	0.95566	1.11878	0.88693	0.94485	0.49572	1.02581	1.03321	0.22322	-0.81936	-1.18017	-0.9102	-0.85556	1.04124	0.99426	-0.40505	-0.24017	0.57983	1.08151	1.21394	0.28598	1.04964		0
-0.1381	0.46923	0.30338	0.15346	0.25644	0.33157	0.08556	0.86755	0.83983	0.89081	0.97568	0.95566	1.11878	0.88693	0.94485	0.49572	1.02581	0.26623	-0.46454	-0.81936	1.2933	0.53669	0.57725	1.04124	0.99426	1.18722	0.56173	1.39734	1.08151	1.21394	1.10103	1.04964		0
1.5191	1.30878	1.12963	1.03449	1.10204	1.17422	0.97232	0.86755	0.83983	0.89081	0.97568	0.95566	1.11878	0.88693	0.94485	1.25647	1.02581	1.03321	-1.1523	-0.81936	-1.18017	-0.9102	-0.85556	-1.52925	0.17882	0.39108	1.36363	1.39734	1.08151	-0.38991	-0.52907	0.24656		0
1.5191	1.30878	1.12963	1.03449	1.10204	1.17422	0.97232	0.86755	0.83983	0.89081	0.97568	0.95566	1.11878	0.88693	0.94485	1.25647	1.02581	1.03321	-1.1523	-0.81936	-1.18017	-0.9102	-0.85556	-1.52925	0.99426	1.18722	1.36363	1.39734	1.08151	1.21394	1.10103	1.04964		0
0.6905	0.46923	0.30338	0.15346	0.25644	0.33157	0.08556	0.86755	0.83983	0.89081	0.97568	0.11206	0.31591	-0.79025	-0.65598	-0.26502	0.18965	1.03321	-0.46454	-0.04922	-0.5618	-0.18675	-0.13915	-1.52925	0.99426	1.18722	1.36363	0.57983	0.24604	1.21394	1.10103	0.24656		0
-1.7953	-2.04944	-2.1754	-2.48962	-2.28038	-2.19638	-0.80119	-1.74492	-1.91812	-1.81898	-0.7206	-1.57514	-2.09268	-1.62883	-0.65598	-1.78651	-1.48266	-1.26773	1.59874	-0.04922	0.67494	1.26013	1.29366	1.04124	-0.63661	-1.20118	-1.84397	-1.87268	-1.42492	-1.19183	-1.34411	-1.3596		0
-0.1381	-0.37033	0.30338	1.03449	-0.58917	-0.51108	-0.80119	0.86755	0.83983	0.89081	-1.56874	-2.41874	-2.09268	0.88693	0.94485	-1.78651	1.02581	0.26623	1.59874	-0.81936	1.2933	0.53669	-0.85556	1.04124	0.99426	-1.99732	-1.84397	-1.05518	-2.2604	0.41202	-0.52907	-1.3596		0
0.6905	-0.37033	-1.34914	0.15346	-0.58917	-0.51108	0.97232	-1.74492	-0.99881	-1.81898	-0.7206	-0.73154	-0.48695	0.04834	-0.65598	-1.78651	-0.6465	0.26623	-1.1523	-0.81936	0.67494	-0.18675	-0.13915	1.04124	-0.63661	-1.20118	-1.84397	-1.05518	-0.58944	-1.19183	-2.15916	-1.3596		0
-0.1381	-0.37033	0.30338	0.15346	0.25644	-0.51108	-0.80119	-1.74492	-1.91812	-0.91572	-0.7206	-0.73154	-0.48695	-0.79025	-0.65598	-0.26502	-0.6465	-0.50075	0.22322	0.72092	1.2933	0.53669	0.57725	0.39862	0.99426	0.39108	0.56173	-0.23767	1.08151	-0.38991	-0.52907	-0.55652		0
1.5191	1.30878	1.12963	1.03449	1.10204	1.17422	0.97232	0.86755	0.83983	0.89081	0.97568	0.95566	1.11878	0.88693	0.94485	1.25647	1.02581	1.03321	-1.1523	-0.81936	-1.18017	-0.9102	-0.85556	-0.88663	0.17882	1.18722	0.56173	1.39734	1.08151	0.41202	1.10103	1.04964		0
1.5191	1.30878	-2.1754	1.03449	1.10204	1.17422	0.97232	0.86755	0.83983	0.89081	0.97568	0.95566	1.11878	0.88693	0.94485	-1.78651	1.02581	-0.50075	1.59874	2.26121	1.2933	-0.9102	1.29366	1.04124	0.99426	1.18722	-0.24017	-1.87268	1.08151	-0.38991	-2.15916	0.24656		0
-0.1381	-0.37033	-0.52288	-0.72756	0.25644	0.33157	0.08556	-0.00327	-0.07949	-0.01245	0.97568	0.95566	0.31591	0.04834	0.14444	-0.26502	-0.6465	-0.50075	-0.46454	-0.81936	0.05657	-0.9102	-0.13915	1.04124	0.99426	1.18722	-0.24017	-0.23767	-1.42492	-0.38991	-0.52907	1.04964		0
-0.1381	1.30878	1.12963	1.03449	1.10204	1.17422	0.97232	0.86755	0.83983	0.89081	0.97568	0.95566	1.11878	0.88693	0.94485	1.25647	1.02581	1.03321	-1.1523	-0.81936	-1.18017	-0.9102	-0.85556	-1.52925	0.99426	1.18722	1.36363	1.39734	1.08151	1.21394	1.10103	1.04964		0
-0.9667	-2.04944	-2.1754	-1.60859	-0.58917	-1.35373	-2.57469	0.86755	0.83983	0.89081	0.97568	0.95566	1.11878	0.88693	0.94485	1.25647	1.02581	1.03321	1.59874	-0.81936	1.2933	-0.9102	-0.85556	1.04124	0.99426	1.18722	1.36363	-0.23767	1.08151	1.21394	1.10103	1.04964		0
0.6905	0.46923	1.12963	0.15346	0.25644	0.33157	0.97232	-0.8741	-0.99881	-0.01245	-0.7206	-0.73154	-1.28981	-0.79025	-0.65598	-0.26502	-0.6465	0.26623	0.22322	-0.81936	1.2933	0.53669	0.57725	1.04124	-0.63661	-0.40505	-0.24017	-1.05518	-0.58944	-1.19183	-1.34411	-0.55652		0
0.6905	1.30878	1.12963	1.03449	1.10204	1.17422	0.97232	-0.00327	-0.07949	-0.01245	-0.7206	0.11206	-0.48695	-0.79025	-0.65598	-1.02576	-0.6465	-0.50075	-0.46454	-0.81936	-1.18017	-0.18675	-0.85556	0.39862	0.17882	0.39108	-0.24017	-0.23767	1.08151	0.41202	-0.52907	1.04964		0
-0.9667	-1.20989	-0.52288	1.03449	0.25644	-2.19638	-2.57469	-0.8741	-0.99881	-2.72225	0.12754	-0.73154	-2.09268	-2.46742	-2.25682	-1.78651	-2.31881	-2.03471	1.59874	0.72092	0.67494	0.53669	2.01006	1.04124	0.99426	0.39108	-1.84397	-1.87268	0.24604	1.21394	-0.52907	1.04964		0
-0.9667	-1.20989	-1.34914	-1.60859	-1.43477	-1.35373	-1.68794	0.86755	0.83983	0.89081	0.97568	0.95566	1.11878	0.88693	0.94485	1.25647	1.02581	1.03321	-1.1523	-0.81936	1.2933	-0.9102	-0.85556	1.04124	0.17882	1.18722	1.36363	-0.23767	1.08151	1.21394	1.10103	1.04964		0
1.5191	1.30878	1.12963	1.03449	1.10204	1.17422	0.08556	-0.8741	-0.99881	-0.91572	-0.7206	0.11206	0.31591	0.88693	-0.65598	-1.02576	-0.6465	-0.50075	-1.1523	-0.81936	-0.5618	-0.9102	-0.85556	-0.88663	0.17882	-0.40505	0.56173	-0.23767	-0.58944	-1.19183	-0.52907	0.24656		0
0.6905	-0.37033	1.12963	1.03449	0.25644	-0.51108	-0.80119	-2.61574	-0.99881	-0.91572	0.12754	-0.73154	-0.48695	0.04834	0.94485	0.49572	0.18965	1.03321	0.22322	-0.81936	-0.5618	-0.9102	-0.85556	-0.244	-0.63661	-0.40505	0.56173	0.57983	1.08151	0.41202	-0.52907	0.24656		0
-0.1381	0.46923	0.30338	0.15346	0.25644	0.33157	0.08556	0.86755	0.83983	-0.01245	0.12754	0.11206	0.31591	0.88693	0.94485	-0.26502	0.18965	0.26623	-1.1523	-0.81936	1.2933	0.53669	0.57725	1.04124	0.17882	0.39108	-0.24017	0.57983	0.24604	-1.99375	-0.52907	-2.16268		0
-0.1381	0.46923	0.30338	0.15346	-0.58917	0.33157	0.97232	0.86755	0.83983	0.89081	-0.7206	-0.73154	-1.28981	0.88693	-0.65598	-1.78651	-1.48266	-1.26773	1.59874	0.72092	1.2933	1.26013	0.57725	1.04124	0.99426	-0.40505	-1.04207	-0.23767	1.08151	-0.38991	-0.52907	-0.55652		0
-0.1381	-0.37033	-0.52288	1.03449	0.25644	0.33157	0.97232	-0.8741	-0.99881	-0.91572	-0.7206	0.95566	-0.48695	0.04834	0.14444	-0.26502	-0.6465	-0.50075	0.91098	0.72092	1.2933	0.53669	-0.85556	1.04124	0.17882	-0.40505	-1.04207	-0.23767	-0.58944	-0.38991	-0.52907	-0.55652		0
0.6905	-0.37033	-0.52288	0.15346	0.25644	0.33157	-0.80119	-0.8741	-0.99881	-0.91572	-0.7206	-0.73154	-1.28981	-0.79025	-1.4564	-1.02576	-1.48266	-1.26773	1.59874	2.26121	1.2933	1.26013	1.29366	1.04124	-0.63661	-1.20118	-1.84397	-0.23767	-0.58944	-1.19183	-2.15916	-0.55652		0
-1.7953	1.30878	-0.52288	-1.60859	-2.28038	-2.19638	-0.80119	-0.00327	-0.07949	-0.01245	-0.7206	-0.73154	-2.09268	-1.62883	-2.25682	-1.78651	0.18965	-0.50075	1.59874	2.26121	1.2933	0.53669	2.01006	0.39862	0.99426	-0.40505	-1.84397	-1.87268	0.24604	-1.99375	-1.34411	-2.16268		0
-0.9667	-0.37033	0.30338	0.15346	-0.58917	0.33157	0.08556	0.86755	0.83983	0.89081	0.97568	0.11206	-0.48695	0.88693	0.94485	-1.02576	0.18965	0.26623	-0.46454	-0.81936	0.67494	-0.18675	-0.85556	0.39862	0.99426	-0.40505	-0.24017	-0.23767	0.24604	1.21394	0.28598	1.04964		0
0.6905	-0.37033	-0.52288	-0.72756	-0.58917	-0.51108	-0.80119	0.86755	0.83983	0.89081	-0.7206	0.95566	0.31591	0.88693	0.14444	1.25647	-0.6465	0.26623	-1.1523	-0.81936	-0.5618	-0.9102	-0.85556	-1.52925	0.17882	0.39108	-0.24017	0.57983	0.24604	-1.19183	0.28598	1.04964		0
-0.1381	-0.37033	-0.52288	-0.72756	-0.58917	-0.51108	-0.80119	-0.00327	-0.07949	-0.01245	0.12754	-1.57514	-2.09268	0.04834	0.14444	-1.78651	0.18965	0.26623	-1.1523	-0.81936	0.05657	-0.9102	-0.85556	-1.52925	0.17882	-1.99732	0.56173	0.57983	0.24604	0.41202	0.28598	0.24656		0
1.5191	1.30878	1.12963	1.03449	1.10204	1.17422	0.97232	0.86755	0.83983	0.89081	0.97568	0.95566	1.11878	0.88693	0.94485	1.25647	1.02581	1.03321	-1.1523	-0.81936	-1.18017	-0.9102	-0.85556	-1.52925	0.99426	1.18722	1.36363	1.39734	1.08151	1.21394	1.10103	1.04964		0
-0.1381	-0.37033	1.12963	0.15346	-0.58917	0.33157	0.08556	0.86755	0.83983	0.89081	0.12754	0.95566	-0.48695	0.88693	0.94485	-0.26502	0.18965	1.03321	-1.1523	-0.81936	-1.18017	-0.9102	-0.85556	-1.52925	0.99426	1.18722	1.36363	1.39734	1.08151	1.21394	0.28598	0.24656		0
-0.9667	-1.20989	0.30338	-0.72756	-1.43477	-0.51108	-1.68794	-0.8741	-0.07949	-0.91572	-1.56874	0.11206	0.31591	0.88693	0.14444	0.49572	1.02581	1.03321	1.59874	1.49107	1.2933	1.98358	2.01006	1.04124	-0.63661	-1.20118	-1.04207	-1.87268	0.24604	-0.38991	-1.34411	-1.3596		0
-0.1381	-0.37033	-2.1754	-1.60859	0.25644	-0.51108	-0.80119	0.86755	0.83983	0.89081	0.97568	0.95566	-1.28981	0.88693	0.94485	1.25647	1.02581	1.03321	1.59874	-0.81936	0.05657	1.98358	-0.85556	1.04124	0.99426	-1.99732	-0.24017	-1.87268	-1.42492	-1.19183	1.10103	-0.55652		0
-0.1381	-0.37033	-0.52288	0.15346	0.25644	0.33157	-0.80119	-0.00327	-0.99881	-0.01245	-1.56874	-0.73154	0.31591	-1.62883	0.14444	0.49572	0.18965	0.26623	0.91098	1.49107	0.05657	1.26013	0.57725	0.39862	0.17882	0.39108	0.56173	-0.23767	-0.58944	0.41202	-0.52907	0.24656		0
-0.1381	1.30878	1.12963	1.03449	1.10204	1.17422	0.97232	-0.00327	0.83983	0.89081	0.97568	0.95566	1.11878	-1.62883	-1.4564	0.49572	1.02581	1.03321	0.91098	-0.04922	0.67494	-0.18675	-0.13915	1.04124	0.99426	1.18722	-0.24017	-0.23767	-0.58944	1.21394	1.10103	0.24656		0
-0.9667	-1.20989	-0.52288	0.15346	-1.43477	-0.51108	-0.80119	-0.00327	-0.07949	-0.01245	0.97568	-0.73154	-2.09268	-1.62883	-1.4564	-1.78651	-0.6465	-1.26773	1.59874	-0.81936	1.2933	0.53669	0.57725	1.04124	-0.63661	0.39108	-0.24017	0.57983	1.08151	-1.19183	-1.34411	0.24656		0
-1.7953	1.30878	1.12963	1.03449	1.10204	0.33157	0.97232	-0.8741	-0.99881	-0.91572	-0.7206	0.11206	-0.48695	-0.79025	-0.65598	-0.26502	-0.6465	-0.50075	-0.46454	-0.81936	-1.18017	-0.18675	-0.85556	-1.52925	0.99426	0.39108	0.56173	0.57983	1.08151	-0.38991	-0.52907	1.04964		0
-1.7953	-2.04944	-0.52288	-2.48962	-0.58917	-0.51108	-2.57469	0.86755	0.83983	0.89081	0.97568	0.95566	1.11878	0.88693	0.94485	0.49572	-0.6465	1.03321	-1.1523	-0.81936	-1.18017	-0.9102	-0.85556	1.04124	0.99426	1.18722	-1.84397	-1.87268	1.08151	-0.38991	1.10103	1.04964		0
0.6905	0.46923	0.30338	0.15346	0.25644	0.33157	0.08556	-0.00327	-0.07949	-0.01245	0.12754	0.95566	0.31591	0.04834	0.14444	0.49572	0.18965	0.26623	0.22322	0.72092	0.67494	0.53669	1.29366	0.39862	0.99426	0.39108	-1.04207	-0.23767	0.24604	0.41202	-0.52907	0.24656		0
-0.1381	-0.37033	1.12963	1.03449	1.10204	1.17422	-0.80119	0.86755	0.83983	0.89081	0.97568	-0.73154	1.11878	0.88693	0.94485	-1.78651	1.02581	-0.50075	1.59874	-0.81936	-1.18017	-0.9102	-0.85556	0.39862	0.99426	-0.40505	-1.84397	-0.23767	-0.58944	0.41202	0.28598	0.24656		0
0.6905	0.46923	-0.52288	1.03449	0.25644	0.33157	0.97232	0.86755	0.83983	0.89081	0.97568	0.95566	1.11878	0.88693	0.94485	0.49572	1.02581	1.03321	0.91098	-0.04922	-1.18017	-0.18675	-0.13915	1.04124	0.99426	1.18722	0.56173	0.57983	1.08151	0.41202	1.10103	1.04964		0
0.6905	1.30878	1.12963	1.03449	1.10204	1.17422	0.97232	-0.00327	0.83983	-0.91572	0.12754	0.11206	1.11878	0.88693	0.94485	0.49572	0.18965	1.03321	-1.1523	-0.81936	1.2933	-0.9102	0.57725	1.04124	-0.63661	-0.40505	-0.24017	-0.23767	0.24604	0.41202	-0.52907	-0.55652		0
-0.1381	-0.37033	0.30338	1.03449	1.10204	1.17422	0.97232	0.86755	0.83983	0.89081	0.97568	0.95566	-0.48695	0.88693	0.94485	-0.26502	1.02581	1.03321	0.22322	-0.81936	0.05657	-0.18675	-0.85556	-0.244	0.99426	1.18722	1.36363	0.57983	0.24604	-0.38991	0.28598	1.04964		0
0.6905	-0.37033	0.30338	0.15346	0.25644	1.17422	0.97232	-1.74492	-0.99881	-0.91572	-0.7206	-0.73154	-0.48695	-1.62883	-1.4564	-0.26502	0.18965	0.26623	-0.46454	-0.81936	-1.18017	-0.9102	-0.13915	0.39862	-0.63661	-0.40505	0.56173	1.39734	-0.58944	-0.38991	-1.34411	1.04964		0
0.6905	-0.37033	0.30338	-0.72756	0.25644	-0.51108	0.08556	-0.00327	-0.07949	-0.01245	0.12754	0.11206	0.31591	0.04834	-0.65598	-1.78651	-1.48266	-0.50075	0.22322	0.72092	1.2933	0.53669	1.29366	0.39862	0.17882	0.39108	-1.04207	-0.23767	0.24604	-0.38991	0.28598	-0.55652		0
0.6905	0.46923	0.30338	0.15346	0.25644	0.33157	0.08556	0.86755	0.83983	0.89081	0.97568	0.95566	1.11878	0.88693	0.94485	1.25647	1.02581	1.03321	1.59874	-0.81936	-1.18017	-0.9102	-0.85556	1.04124	0.99426	1.18722	1.36363	1.39734	1.08151	1.21394	1.10103	1.04964		0
-0.1381	-0.37033	-0.52288	-0.72756	-0.58917	-0.51108	0.97232	0.86755	0.83983	0.89081	0.97568	0.95566	1.11878	0.88693	0.94485	-0.26502	-0.6465	0.26623	0.22322	-0.81936	-1.18017	0.53669	-0.13915	1.04124	0.99426	1.18722	0.56173	-0.23767	1.08151	-0.38991	-0.52907	1.04964		0
-1.7953	-2.04944	-2.1754	-2.48962	-2.28038	-2.19638	-2.57469	-2.61574	-2.83744	-2.72225	-2.41688	-2.41874	-1.28981	-2.46742	-2.25682	-1.78651	-2.31881	-2.03471	1.59874	0.72092	1.2933	0.53669	2.01006	1.04124	-1.45204	-0.40505	0.56173	-1.05518	-2.2604	-0.38991	1.10103	0.24656		0
1.5191	1.30878	1.12963	1.03449	1.10204	1.17422	0.97232	0.86755	0.83983	0.89081	0.97568	0.95566	1.11878	0.04834	0.14444	-0.26502	1.02581	1.03321	0.91098	-0.81936	0.05657	-0.9102	-0.85556	0.39862	0.99426	1.18722	0.56173	0.57983	1.08151	0.41202	1.10103	1.04964		0
1.5191	1.30878	1.12963	1.03449	1.10204	1.17422	0.97232	0.86755	0.83983	0.89081	0.97568	0.95566	1.11878	0.88693	0.94485	1.25647	1.02581	1.03321	0.22322	0.72092	0.67494	1.26013	-0.13915	0.39862	0.99426	1.18722	1.36363	1.39734	1.08151	1.21394	1.10103	0.24656		0
-0.1381	-0.37033	-0.52288	-0.72756	-0.58917	-0.51108	0.08556	-0.8741	-0.07949	-0.01245	0.12754	0.11206	0.31591	0.04834	0.14444	-0.26502	0.18965	0.26623	0.22322	0.72092	0.67494	1.26013	1.29366	0.39862	-0.63661	-0.40505	-0.24017	-1.05518	-1.42492	-1.19183	-0.52907	0.24656		0
0.6905	0.46923	0.30338	0.15346	0.25644	-0.51108	0.08556	-0.00327	-0.07949	-0.91572	-0.7206	-1.57514	0.31591	0.88693	0.94485	0.49572	1.02581	1.03321	-0.46454	-0.81936	-1.18017	-0.9102	-0.85556	-1.52925	0.17882	0.39108	0.56173	1.39734	0.24604	-0.38991	-0.52907	0.24656		0
0.6905	1.30878	1.12963	1.03449	1.10204	1.17422	0.97232	0.86755	0.83983	0.89081	0.97568	0.95566	-0.48695	0.88693	0.94485	0.49572	1.02581	1.03321	0.22322	-0.81936	1.2933	0.53669	0.57725	1.04124	0.99426	1.18722	0.56173	-0.23767	1.08151	1.21394	0.28598	1.04964		0
-1.7953	-2.04944	0.30338	-1.60859	-0.58917	-0.51108	-1.68794	0.86755	0.83983	0.89081	0.97568	0.95566	0.31591	0.88693	0.94485	1.25647	1.02581	1.03321	-1.1523	-0.81936	1.2933	-0.9102	-0.85556	1.04124	0.99426	1.18722	1.36363	0.57983	1.08151	0.41202	1.10103	1.04964		0
-0.1381	-0.37033	-1.34914	-0.72756	0.25644	0.33157	0.08556	-1.74492	-0.99881	-0.91572	-0.7206	-2.41874	1.11878	0.88693	0.94485	1.25647	1.02581	1.03321	-1.1523	-0.81936	1.2933	1.98358	2.01006	1.04124	-1.45204	1.18722	1.36363	-1.87268	-0.58944	0.41202	-1.34411	0.24656		0
-0.1381	0.46923	-0.52288	-0.72756	-0.58917	-0.51108	0.08556	-0.8741	-0.07949	-0.01245	0.12754	-0.73154	-2.09268	-1.62883	-0.65598	-0.26502	-0.6465	-0.50075	1.59874	0.72092	1.2933	0.53669	0.57725	1.04124	-0.63661	-0.40505	-1.04207	-0.23767	0.24604	0.41202	1.10103	-0.55652		0
-0.1381	0.46923	0.30338	1.03449	1.10204	1.17422	-0.80119	0.86755	0.83983	0.89081	0.97568	0.95566	1.11878	0.88693	0.94485	1.25647	1.02581	1.03321	-1.1523	-0.81936	-1.18017	-0.9102	-0.85556	1.04124	0.99426	1.18722	1.36363	1.39734	1.08151	1.21394	1.10103	0.24656		0
0.6905	0.46923	0.30338	0.15346	1.10204	1.17422	0.97232	-0.8741	0.83983	0.89081	0.97568	0.95566	1.11878	0.88693	0.94485	1.25647	1.02581	1.03321	-1.1523	-0.81936	0.67494	-0.9102	-0.85556	-1.52925	0.17882	0.39108	0.56173	0.57983	0.24604	-0.38991	1.10103	1.04964		0
-0.1381	1.30878	1.12963	1.03449	1.10204	1.17422	0.97232	0.86755	0.83983	0.89081	0.97568	0.95566	1.11878	0.88693	0.94485	1.25647	1.02581	1.03321	-1.1523	-0.81936	0.67494	-0.9102	-0.85556	-0.244	-1.45204	-1.99732	-1.04207	-1.87268	-2.2604	-1.99375	-0.52907	1.04964		0
-0.1381	-0.37033	1.12963	-0.72756	-0.58917	-0.51108	0.97232	0.86755	0.83983	0.89081	0.97568	0.95566	1.11878	0.88693	0.94485	1.25647	1.02581	1.03321	0.91098	-0.81936	1.2933	-0.9102	-0.85556	-0.244	0.99426	1.18722	1.36363	1.39734	1.08151	1.21394	1.10103	1.04964		0
-1.7953	-0.37033	-2.1754	-1.60859	-2.28038	-0.51108	-2.57469	-0.8741	-0.99881	-0.91572	-0.7206	0.11206	0.31591	0.04834	0.14444	0.49572	0.18965	0.26623	0.91098	1.49107	0.67494	1.26013	1.29366	1.04124	-0.63661	-0.40505	-0.24017	-0.23767	-0.58944	-0.38991	-0.52907	-0.55652		0
0.6905	1.30878	1.12963	1.03449	-0.58917	-0.51108	0.97232	0.86755	0.83983	0.89081	0.97568	0.95566	1.11878	0.88693	0.94485	1.25647	1.02581	1.03321	-1.1523	-0.81936	-1.18017	-0.9102	-0.85556	-1.52925	0.99426	1.18722	1.36363	1.39734	1.08151	1.21394	1.10103	1.04964		0
-0.9667	-1.20989	-1.34914	-0.72756	0.25644	0.33157	0.97232	0.86755	0.83983	0.89081	0.97568	0.95566	1.11878	0.88693	0.94485	1.25647	1.02581	1.03321	0.22322	-0.04922	0.67494	-0.18675	-0.13915	1.04124	0.99426	1.18722	-1.84397	-0.23767	1.08151	-1.99375	-1.34411	-0.55652		0
0.6905	1.30878	-1.34914	0.15346	0.25644	-0.51108	0.97232	-0.00327	0.83983	-0.01245	-0.7206	0.95566	1.11878	0.04834	0.14444	0.49572	1.02581	1.03321	0.91098	2.26121	-1.18017	1.26013	0.57725	1.04124	0.17882	-0.40505	-0.24017	-1.05518	0.24604	-0.38991	0.28598	-1.3596		0
-0.1381	-1.20989	-0.52288	-1.60859	-0.58917	-0.51108	-0.80119	-1.74492	-0.99881	-0.91572	-0.7206	-0.73154	-0.48695	-0.79025	-0.65598	-1.02576	0.18965	0.26623	0.91098	-0.04922	1.2933	-0.18675	-0.13915	1.04124	-1.45204	-0.40505	-1.84397	-1.05518	-1.42492	-1.19183	-2.15916	-0.55652		0
-1.7953	-0.37033	-0.52288	-0.72756	1.10204	-2.19638	0.97232	-2.61574	-2.83744	-2.72225	-2.41688	-0.73154	-0.48695	0.88693	0.94485	-1.78651	1.02581	1.03321	-1.1523	-0.81936	-1.18017	-0.9102	-0.85556	-1.52925	-1.45204	-1.99732	1.36363	-0.23767	-0.58944	1.21394	0.28598	1.04964		0
-1.7953	-0.37033	-0.52288	-0.72756	-0.58917	-0.51108	-0.80119	-0.8741	-0.07949	0.89081	0.97568	0.95566	0.31591	-0.79025	-0.65598	-0.26502	-1.48266	-0.50075	0.91098	0.72092	0.05657	0.53669	1.29366	1.04124	-0.63661	1.18722	-0.24017	0.57983	-0.58944	-1.99375	1.10103	1.04964		0
-0.1381	-0.37033	0.30338	1.03449	0.25644	-0.51108	0.08556	0.86755	0.83983	0.89081	-0.7206	-0.73154	0.31591	0.04834	0.14444	-1.02576	-0.6465	-0.50075	0.91098	-0.04922	1.2933	1.98358	2.01006	1.04124	0.17882	-0.40505	-1.04207	-0.23767	0.24604	-0.38991	-0.52907	0.24656		0
-0.1381	-0.37033	-0.52288	-0.72756	-0.58917	-0.51108	-0.80119	-0.8741	-0.99881	-0.91572	-1.56874	-0.73154	-0.48695	-0.79025	-0.65598	-1.02576	-0.6465	-0.50075	0.22322	0.72092	0.05657	-0.18675	0.57725	0.39862	-0.63661	-1.20118	-0.24017	-0.23767	-0.58944	-0.38991	-1.34411	-0.55652		0
-0.1381	0.46923	0.30338	0.15346	-0.58917	-0.51108	-0.80119	-0.8741	-1.91812	-0.91572	-1.56874	-2.41874	-0.48695	0.04834	0.14444	-1.02576	-1.48266	0.26623	1.59874	2.26121	0.67494	1.98358	2.01006	0.39862	-0.63661	-1.20118	-1.84397	-1.05518	-0.58944	-1.19183	-2.15916	-2.16268		0
0.6905	1.30878	1.12963	1.03449	1.10204	1.17422	0.97232	0.86755	0.83983	0.89081	0.97568	0.95566	-0.48695	0.04834	0.14444	-1.78651	0.18965	1.03321	-0.46454	-0.04922	1.2933	-0.18675	-0.13915	-0.88663	0.99426	-1.99732	-0.24017	0.57983	0.24604	0.41202	1.10103	1.04964		0
0.6905	-0.37033	1.12963	0.15346	1.10204	1.17422	0.97232	-0.00327	-0.07949	0.89081	0.97568	0.95566	0.31591	-0.79025	-0.65598	-0.26502	0.18965	0.26623	0.22322	-0.81936	1.2933	1.98358	1.29366	1.04124	0.99426	-0.40505	-0.24017	-1.05518	0.24604	-0.38991	-0.52907	-0.55652		0
-0.1381	0.46923	-0.52288	0.15346	-1.43477	0.33157	-0.80119	-0.8741	-1.91812	-0.91572	-0.7206	-1.57514	-1.28981	0.88693	0.94485	-1.78651	1.02581	0.26623	1.59874	2.26121	1.2933	1.98358	2.01006	1.04124	0.17882	-0.40505	-1.04207	0.57983	-2.2604	1.21394	-2.15916	0.24656		0
0.6905	0.46923	0.30338	0.15346	0.25644	0.33157	0.08556	0.86755	0.83983	0.89081	0.97568	-0.73154	0.31591	0.04834	0.14444	0.49572	0.18965	0.26623	-0.46454	-0.81936	-0.5618	-0.18675	-0.85556	-0.244	0.17882	0.39108	-0.24017	-0.23767	0.24604	0.41202	0.28598	0.24656		0
0.6905	0.46923	0.30338	0.15346	0.25644	0.33157	0.08556	0.86755	-0.07949	-0.91572	-1.56874	0.95566	0.31591	-0.79025	-1.4564	-0.26502	1.02581	0.26623	0.22322	0.72092	-0.5618	0.53669	1.29366	1.04124	0.99426	0.39108	-0.24017	-1.05518	0.24604	1.21394	0.28598	0.24656		0
0.6905	0.46923	0.30338	0.15346	0.25644	0.33157	0.08556	0.86755	0.83983	0.89081	0.97568	0.95566	1.11878	0.88693	0.94485	1.25647	1.02581	1.03321	-1.1523	-0.81936	-1.18017	-0.9102	-0.85556	-1.52925	0.99426	1.18722	1.36363	1.39734	1.08151	1.21394	1.10103	1.04964		0
0.6905	0.46923	1.12963	1.03449	1.10204	1.17422	0.97232	-0.00327	0.83983	0.89081	0.12754	0.95566	1.11878	0.88693	0.94485	-0.26502	0.18965	0.26623	-1.1523	-0.81936	0.05657	-0.9102	-0.85556	0.39862	0.99426	0.39108	-0.24017	0.57983	1.08151	0.41202	1.10103	0.24656		0
1.5191	1.30878	1.12963	1.03449	1.10204	1.17422	0.97232	-0.00327	-0.07949	-0.01245	-0.7206	0.95566	0.31591	-0.79025	-0.65598	-1.02576	-0.6465	-0.50075	0.22322	0.72092	1.2933	0.53669	0.57725	1.04124	0.99426	-0.40505	0.56173	-0.23767	0.24604	-0.38991	-0.52907	0.24656		0
-0.1381	-0.37033	-0.52288	-0.72756	-0.58917	-0.51108	-0.80119	-0.00327	-0.07949	-0.01245	0.12754	-0.73154	-0.48695	-0.79025	-0.65598	-0.26502	-0.6465	-0.50075	-0.46454	-0.04922	-0.5618	-0.18675	-0.13915	-0.88663	-0.63661	-0.40505	-0.24017	-0.23767	-0.58944	-0.38991	-0.52907	-0.55652		0
-0.1381	-0.37033	-0.52288	-0.72756	-0.58917	-0.51108	-0.80119	-2.61574	-2.83744	-2.72225	-2.41688	-2.41874	-2.09268	-2.46742	-2.25682	-1.78651	-2.31881	-2.03471	1.59874	2.26121	1.2933	1.98358	2.01006	1.04124	-2.26747	-1.99732	-1.84397	-1.87268	-2.2604	-1.99375	-2.15916	-2.16268		0
1.5191	1.30878	1.12963	1.03449	1.10204	1.17422	0.97232	0.86755	0.83983	0.89081	0.97568	0.95566	1.11878	0.88693	0.94485	1.25647	1.02581	1.03321	-1.1523	-0.81936	-1.18017	-0.9102	-0.85556	-1.52925	0.99426	1.18722	1.36363	1.39734	1.08151	1.21394	1.10103	1.04964		0
-0.1381	1.30878	0.30338	1.03449	0.25644	-0.51108	0.08556	-1.74492	-0.99881	-1.81898	-1.56874	0.11206	0.31591	0.04834	0.14444	0.49572	0.18965	0.26623	0.22322	0.72092	0.05657	0.53669	1.29366	1.04124	0.99426	1.18722	-0.24017	-1.05518	-0.58944	-0.38991	-0.52907	-0.55652		0
-0.1381	-0.37033	-0.52288	-0.72756	0.25644	0.33157	0.08556	-0.00327	-0.99881	-0.91572	0.12754	0.11206	0.31591	0.88693	0.94485	-1.02576	0.18965	0.26623	0.22322	-0.04922	-0.5618	-0.9102	-0.85556	-0.88663	0.99426	-1.20118	-1.04207	-0.23767	0.24604	0.41202	0.28598	-0.55652		0
-0.1381	-0.37033	1.12963	-1.60859	-0.58917	-1.35373	-0.80119	-0.00327	0.83983	-1.81898	0.12754	-1.57514	0.31591	0.88693	0.94485	-0.26502	0.18965	0.26623	0.91098	-0.81936	0.67494	1.26013	-0.85556	1.04124	-0.63661	-0.40505	-0.24017	-1.05518	-0.58944	-1.19183	-2.15916	-1.3596		0
0.6905	-0.37033	-0.52288	-0.72756	-0.58917	-0.51108	-0.80119	-0.8741	-0.99881	-0.91572	-0.7206	-0.73154	-0.48695	-0.79025	-0.65598	-0.26502	-0.6465	-0.50075	-1.1523	-0.81936	-1.18017	-0.9102	-0.85556	1.04124	-0.63661	-0.40505	-0.24017	-0.23767	-0.58944	-0.38991	-0.52907	-0.55652		0
-1.7953	0.46923	1.12963	1.03449	1.10204	1.17422	0.97232	0.86755	0.83983	0.89081	0.97568	0.95566	1.11878	0.88693	0.94485	-0.26502	1.02581	1.03321	-1.1523	-0.81936	-1.18017	-0.9102	-0.85556	-0.244	0.17882	-0.40505	-0.24017	-0.23767	0.24604	1.21394	1.10103	-0.55652		0
-0.1381	-0.37033	-1.34914	-0.72756	-0.58917	0.33157	-0.80119	-0.8741	-0.99881	-0.91572	-0.7206	0.11206	0.31591	-0.79025	0.14444	-0.26502	0.18965	-0.50075	0.91098	1.49107	1.2933	1.98358	2.01006	1.04124	-1.45204	-1.20118	-1.04207	-1.05518	-1.42492	-0.38991	-0.52907	-0.55652		0
-0.9667	-0.37033	-0.52288	-0.72756	-0.58917	-0.51108	-0.80119	-0.8741	-0.99881	-0.91572	-0.7206	-0.73154	-0.48695	-0.79025	-0.65598	-0.26502	-0.6465	-0.50075	-0.46454	-0.04922	-0.5618	-0.18675	-0.13915	-0.88663	-0.63661	-0.40505	-0.24017	-0.23767	-0.58944	-1.19183	-0.52907	-0.55652		0
-1.7953	-2.04944	-2.1754	1.03449	1.10204	-2.19638	-0.80119	-0.8741	-1.91812	-1.81898	-1.56874	-1.57514	-2.09268	-2.46742	-2.25682	-1.78651	-2.31881	-2.03471	0.22322	-0.81936	1.2933	-0.9102	-0.85556	1.04124	-0.63661	-1.20118	-1.84397	-1.87268	-1.42492	0.41202	-2.15916	-2.16268		0
0.6905	1.30878	1.12963	1.03449	1.10204	1.17422	0.97232	0.86755	0.83983	0.89081	0.97568	0.95566	1.11878	0.88693	0.94485	1.25647	1.02581	1.03321	0.22322	-0.81936	-1.18017	-0.9102	-0.85556	-1.52925	0.99426	1.18722	1.36363	1.39734	1.08151	1.21394	1.10103	1.04964		0
0.6905	0.46923	0.30338	0.15346	0.25644	-0.51108	0.08556	0.86755	0.83983	0.89081	0.97568	0.11206	0.31591	0.88693	0.14444	0.49572	0.18965	0.26623	-0.46454	-0.81936	-1.18017	0.53669	-0.13915	1.04124	0.17882	-0.40505	-0.24017	-1.05518	1.08151	1.21394	1.10103	-0.55652		0
1.5191	1.30878	1.12963	1.03449	-0.58917	-0.51108	-0.80119	-0.8741	0.83983	0.89081	-0.7206	0.95566	-2.09268	0.88693	0.94485	1.25647	1.02581	1.03321	-1.1523	-0.81936	-1.18017	1.98358	-0.85556	1.04124	0.99426	1.18722	1.36363	1.39734	1.08151	1.21394	1.10103	1.04964		0
-0.9667	-0.37033	0.30338	-0.72756	-0.58917	-1.35373	0.08556	-0.00327	-0.07949	-0.91572	-1.56874	-0.73154	-1.28981	-0.79025	-1.4564	-1.78651	-1.48266	-1.26773	-0.46454	-0.81936	0.05657	0.53669	-0.13915	0.39862	-1.45204	-1.20118	-1.04207	-1.87268	-1.42492	-1.99375	-1.34411	-1.3596		0
-1.7953	1.30878	1.12963	1.03449	1.10204	1.17422	0.97232	0.86755	0.83983	0.89081	0.97568	0.95566	-2.09268	0.88693	0.94485	1.25647	1.02581	1.03321	-1.1523	-0.81936	-1.18017	-0.9102	-0.85556	-1.52925	0.99426	1.18722	1.36363	1.39734	1.08151	1.21394	1.10103	1.04964		0
-1.7953	-2.04944	-2.1754	1.03449	-2.28038	-2.19638	-2.57469	0.86755	0.83983	0.89081	0.97568	0.95566	1.11878	0.88693	0.94485	1.25647	1.02581	1.03321	-1.1523	-0.81936	-1.18017	-0.9102	-0.85556	1.04124	0.99426	1.18722	1.36363	1.39734	1.08151	1.21394	1.10103	1.04964		0
-1.7953	-1.20989	-0.52288	-0.72756	-1.43477	-2.19638	-2.57469	-0.8741	-0.07949	-0.01245	-0.7206	0.11206	0.31591	0.04834	-0.65598	-0.26502	-0.6465	-0.50075	-1.1523	-0.04922	0.67494	-0.18675	-0.85556	0.39862	0.17882	-0.40505	-1.04207	-0.23767	0.24604	-1.19183	-0.52907	0.24656		0
1.5191	1.30878	1.12963	1.03449	1.10204	1.17422	0.97232	0.86755	0.83983	0.89081	0.97568	0.95566	1.11878	0.04834	0.14444	-1.78651	0.18965	0.26623	1.59874	-0.04922	1.2933	1.98358	2.01006	1.04124	-1.45204	-1.20118	-1.04207	-1.05518	-1.42492	-1.19183	-1.34411	1.04964		0
-0.1381	-0.37033	-0.52288	-0.72756	-0.58917	-0.51108	-0.80119	-2.61574	-0.99881	-0.91572	-0.7206	0.95566	1.11878	0.88693	0.94485	1.25647	1.02581	1.03321	0.22322	-0.81936	1.2933	1.98358	2.01006	1.04124	-0.63661	-0.40505	-1.84397	-1.87268	-0.58944	-0.38991	-0.52907	-2.16268		0
-0.9667	-1.20989	-2.1754	1.03449	1.10204	-0.51108	-0.80119	0.86755	0.83983	0.89081	0.97568	0.95566	1.11878	0.88693	0.94485	1.25647	1.02581	1.03321	-1.1523	-0.81936	-1.18017	-0.9102	-0.85556	1.04124	0.99426	1.18722	-0.24017	-0.23767	1.08151	1.21394	1.10103	1.04964		0
0.6905	0.46923	0.30338	0.15346	0.25644	-2.19638	0.08556	-0.00327	-0.07949	-0.01245	0.12754	0.11206	-2.09268	-2.46742	-2.25682	-1.78651	-2.31881	-0.50075	-0.46454	-0.81936	1.2933	-0.9102	-0.85556	1.04124	-0.63661	0.39108	-0.24017	-0.23767	0.24604	0.41202	0.28598	0.24656		0
1.5191	1.30878	1.12963	1.03449	1.10204	1.17422	0.97232	0.86755	0.83983	0.89081	0.97568	0.95566	1.11878	0.88693	0.94485	1.25647	1.02581	1.03321	-1.1523	-0.81936	-1.18017	-0.9102	-0.85556	-0.244	0.99426	1.18722	1.36363	1.39734	1.08151	1.21394	1.10103	1.04964		0
-0.9667	-0.37033	-0.52288	-0.72756	-1.43477	0.33157	0.08556	-0.8741	-1.91812	-1.81898	-0.7206	-0.73154	-0.48695	-0.79025	-0.65598	-0.26502	-1.48266	-1.26773	1.59874	1.49107	0.05657	1.26013	2.01006	1.04124	-1.45204	-1.20118	-1.84397	-1.87268	-0.58944	-0.38991	-0.52907	-1.3596		0
-0.1381	-0.37033	-0.52288	-0.72756	-0.58917	-0.51108	-0.80119	-0.00327	-0.07949	-0.01245	-0.7206	0.11206	0.31591	0.04834	-0.65598	-0.26502	-0.6465	0.26623	0.91098	1.49107	0.67494	1.26013	1.29366	0.39862	0.17882	0.39108	-0.24017	-0.23767	-0.58944	-0.38991	-0.52907	0.24656		0
1.5191	1.30878	1.12963	1.03449	1.10204	1.17422	0.97232	0.86755	0.83983	0.89081	0.97568	0.95566	1.11878	0.88693	0.94485	1.25647	1.02581	1.03321	1.59874	-0.81936	-1.18017	1.98358	-0.85556	1.04124	0.99426	1.18722	-1.84397	-1.87268	1.08151	1.21394	1.10103	1.04964		0
1.5191	1.30878	1.12963	1.03449	1.10204	0.33157	0.97232	0.86755	0.83983	0.89081	0.97568	0.95566	1.11878	0.88693	0.94485	-0.26502	1.02581	1.03321	0.91098	-0.04922	1.2933	0.53669	-0.85556	1.04124	0.17882	-0.40505	-1.04207	-0.23767	0.24604	0.41202	0.28598	0.24656		0
1.5191	1.30878	1.12963	1.03449	1.10204	1.17422	0.97232	0.86755	0.83983	0.89081	0.97568	0.95566	-2.09268	-2.46742	-2.25682	-1.78651	-2.31881	-2.03471	-1.1523	-0.81936	-1.18017	-0.9102	-0.85556	-1.52925	0.99426	1.18722	1.36363	1.39734	1.08151	1.21394	1.10103	1.04964		0
-0.1381	0.46923	0.30338	0.15346	0.25644	0.33157	0.08556	-0.00327	-0.07949	-0.01245	0.12754	0.95566	1.11878	0.88693	0.94485	1.25647	1.02581	1.03321	0.91098	1.49107	0.67494	-0.18675	-0.13915	0.39862	0.17882	0.39108	0.56173	0.57983	0.24604	-0.38991	-0.52907	-0.55652		0
0.6905	1.30878	1.12963	0.15346	0.25644	0.33157	0.97232	-0.00327	-0.07949	-0.01245	0.12754	0.11206	-0.48695	0.04834	-0.65598	-0.26502	1.02581	0.26623	0.91098	1.49107	1.2933	0.53669	1.29366	1.04124	-0.63661	0.39108	0.56173	-1.05518	-0.58944	0.41202	0.28598	-0.55652		0
-0.1381	-0.37033	1.12963	-0.72756	-1.43477	-0.51108	-0.80119	-1.74492	-1.91812	-1.81898	-0.7206	-1.57514	0.31591	-0.79025	-1.4564	-1.78651	-1.48266	-0.50075	1.59874	1.49107	0.67494	-0.9102	-0.85556	1.04124	0.17882	0.39108	-1.84397	-1.87268	-0.58944	-0.38991	-0.52907	-0.55652		0
-0.1381	-0.37033	0.30338	0.15346	-0.58917	-0.51108	-0.80119	-0.00327	-0.07949	-0.01245	-0.7206	0.11206	-0.48695	0.04834	0.14444	-0.26502	0.18965	0.26623	0.91098	-0.04922	0.05657	0.53669	0.57725	0.39862	0.17882	-0.40505	-0.24017	-1.05518	0.24604	-1.19183	0.28598	-0.55652		0
0.6905	1.30878	0.30338	1.03449	1.10204	0.33157	0.08556	0.86755	-0.07949	0.89081	0.97568	0.11206	-0.48695	-0.79025	0.14444	1.25647	0.18965	1.03321	-1.1523	-0.81936	-0.5618	-0.9102	-0.85556	-0.88663	0.99426	0.39108	1.36363	1.39734	1.08151	0.41202	1.10103	1.04964		0
-0.1381	-0.37033	-0.52288	0.15346	0.25644	0.33157	0.08556	0.86755	-0.99881	-0.01245	-0.7206	0.95566	1.11878	0.88693	0.14444	-0.26502	1.02581	-0.50075	0.91098	0.72092	0.67494	0.53669	1.29366	-0.244	-0.63661	0.39108	-0.24017	0.57983	1.08151	0.41202	1.10103	1.04964		0
0.6905	1.30878	0.30338	0.15346	0.25644	0.33157	0.08556	0.86755	0.83983	0.89081	0.97568	0.95566	1.11878	0.88693	0.94485	-0.26502	1.02581	-0.50075	-1.1523	-0.81936	-1.18017	-0.9102	-0.85556	-1.52925	0.99426	0.39108	1.36363	1.39734	1.08151	1.21394	0.28598	1.04964		0
1.5191	1.30878	1.12963	1.03449	1.10204	1.17422	0.97232	0.86755	0.83983	0.89081	0.97568	0.95566	1.11878	0.88693	0.14444	-0.26502	0.18965	1.03321	-0.46454	-0.81936	-1.18017	-0.9102	-0.85556	0.39862	0.17882	0.39108	0.56173	0.57983	1.08151	1.21394	1.10103	1.04964		0
-1.7953	-0.37033	-1.34914	1.03449	1.10204	0.33157	0.97232	-0.00327	-0.07949	0.89081	0.97568	-0.73154	-0.48695	-0.79025	-0.65598	-1.02576	-0.6465	0.26623	0.22322	-0.81936	-0.5618	-0.9102	-0.85556	-0.244	-1.45204	-1.20118	-1.04207	-1.05518	-0.58944	-1.19183	-2.15916	-2.16268		0
-0.1381	0.46923	0.30338	1.03449	1.10204	1.17422	0.97232	-0.8741	-0.99881	-0.91572	-0.7206	-0.73154	-0.48695	-0.79025	-0.65598	-1.02576	-0.6465	-1.26773	0.22322	-0.81936	1.2933	0.53669	-0.13915	1.04124	0.17882	0.39108	-0.24017	-0.23767	0.24604	1.21394	0.28598	0.24656		0
-0.1381	0.46923	0.30338	1.03449	0.25644	-0.51108	-0.80119	0.86755	0.83983	0.89081	0.97568	0.95566	1.11878	0.88693	0.94485	-0.26502	1.02581	1.03321	1.59874	0.72092	0.05657	0.53669	0.57725	-0.244	0.17882	0.39108	-0.24017	-0.23767	0.24604	-0.38991	-0.52907	-0.55652		0
1.5191	1.30878	1.12963	1.03449	1.10204	1.17422	0.97232	-2.61574	-2.83744	-2.72225	-2.41688	-0.73154	-0.48695	-0.79025	-0.65598	-0.26502	-0.6465	-0.50075	-1.1523	-0.81936	-1.18017	-0.9102	-0.85556	-1.52925	-0.63661	-0.40505	-0.24017	1.39734	-0.58944	-0.38991	-0.52907	-2.16268		0
-0.1381	-0.37033	-0.52288	-0.72756	-0.58917	-0.51108	-0.80119	-0.00327	-0.07949	-0.01245	0.12754	-0.73154	-0.48695	0.88693	0.14444	0.49572	0.18965	1.03321	0.22322	1.49107	1.2933	1.98358	1.29366	1.04124	0.17882	-0.40505	-0.24017	-1.05518	0.24604	0.41202	0.28598	-1.3596		0
-0.1381	0.46923	0.30338	0.15346	0.25644	0.33157	0.08556	-0.00327	-0.99881	-0.01245	-0.7206	-0.73154	-0.48695	-0.79025	-0.65598	-0.26502	-0.6465	-0.50075	0.22322	0.72092	0.05657	0.53669	0.57725	-0.244	-0.63661	-0.40505	-0.24017	-0.23767	-0.58944	-0.38991	-0.52907	-0.55652		0
-0.9667	-0.37033	-1.34914	-0.72756	-1.43477	-1.35373	-0.80119	-0.8741	-0.99881	-0.91572	-1.56874	-1.57514	-1.28981	-0.79025	-0.65598	-0.26502	-0.6465	-0.50075	0.91098	0.72092	0.67494	-0.18675	-0.13915	-0.244	-0.63661	-1.20118	-1.04207	-1.05518	-0.58944	-0.38991	-0.52907	-0.55652		0
-0.1381	-0.37033	-0.52288	-0.72756	-0.58917	-0.51108	-0.80119	-0.8741	-0.99881	-0.01245	0.12754	-0.73154	-0.48695	0.04834	0.14444	-0.26502	-0.6465	-0.50075	0.22322	0.72092	0.67494	1.26013	1.29366	0.39862	-0.63661	-0.40505	-1.04207	0.57983	-0.58944	-0.38991	-0.52907	-0.55652		0
-0.9667	0.46923	-0.52288	0.15346	0.25644	0.33157	0.08556	-0.8741	-0.99881	-0.91572	-0.7206	-0.73154	-0.48695	-0.79025	-0.65598	-0.26502	-0.6465	-0.50075	-1.1523	-0.04922	-0.5618	-0.18675	-0.13915	-0.88663	-0.63661	-0.40505	-0.24017	-0.23767	-0.58944	-0.38991	-0.52907	0.24656		0
1.5191	1.30878	1.12963	1.03449	1.10204	1.17422	0.97232	0.86755	0.83983	0.89081	0.97568	0.95566	1.11878	0.88693	0.94485	1.25647	1.02581	1.03321	-1.1523	-0.81936	-1.18017	-0.9102	-0.85556	-1.52925	-0.63661	-1.20118	-1.04207	-0.23767	1.08151	1.21394	-0.52907	0.24656		0
0.6905	-0.37033	0.30338	1.03449	1.10204	1.17422	0.08556	0.86755	-0.99881	-0.91572	-0.7206	0.11206	0.31591	0.04834	0.14444	0.49572	0.18965	0.26623	-1.1523	-0.81936	0.67494	-0.9102	-0.85556	-0.244	0.99426	1.18722	0.56173	0.57983	1.08151	-1.99375	1.10103	-0.55652		0
-1.7953	1.30878	1.12963	1.03449	1.10204	1.17422	0.97232	0.86755	0.83983	0.89081	0.97568	0.95566	1.11878	0.88693	0.94485	1.25647	1.02581	1.03321	-1.1523	-0.81936	-1.18017	-0.9102	-0.85556	1.04124	0.17882	0.39108	1.36363	0.57983	1.08151	1.21394	1.10103	1.04964		0
-0.1381	-0.37033	1.12963	1.03449	1.10204	1.17422	0.97232	0.86755	0.83983	0.89081	0.97568	0.11206	1.11878	0.88693	0.94485	-0.26502	-0.6465	0.26623	-1.1523	-0.81936	-1.18017	-0.9102	-0.85556	1.04124	-0.63661	0.39108	-0.24017	-0.23767	0.24604	0.41202	0.28598	1.04964		0
-1.7953	-2.04944	-0.52288	-1.60859	-2.28038	-2.19638	-2.57469	-0.8741	-0.99881	-1.81898	-1.56874	-1.57514	-0.48695	-2.46742	-2.25682	-1.78651	-0.6465	-1.26773	-0.46454	2.26121	0.05657	-0.9102	-0.85556	-0.244	-2.26747	-1.99732	-0.24017	-1.05518	-1.42492	-1.19183	-0.52907	-2.16268		0
1.5191	1.30878	1.12963	1.03449	1.10204	1.17422	0.97232	0.86755	0.83983	0.89081	0.97568	0.95566	1.11878	0.88693	0.94485	1.25647	1.02581	1.03321	-1.1523	-0.81936	-1.18017	-0.9102	-0.85556	-1.52925	0.99426	1.18722	1.36363	1.39734	1.08151	1.21394	1.10103	1.04964		0
-1.7953	-0.37033	-0.52288	-0.72756	-0.58917	-0.51108	-0.80119	0.86755	0.83983	-0.01245	-0.7206	0.95566	0.31591	-0.79025	-0.65598	1.25647	0.18965	-0.50075	1.59874	2.26121	0.67494	-0.18675	2.01006	0.39862	0.99426	0.39108	-0.24017	0.57983	-0.58944	1.21394	1.10103	-1.3596		0
-0.9667	-0.37033	-0.52288	0.15346	0.25644	-0.51108	0.97232	-0.8741	-0.99881	-0.91572	-0.7206	-0.73154	-0.48695	0.04834	-0.65598	-1.02576	0.18965	1.03321	0.22322	-0.04922	1.2933	0.53669	-0.13915	0.39862	-0.63661	-0.40505	-1.04207	0.57983	0.24604	-1.19183	-0.52907	0.24656		0
-0.1381	-0.37033	-0.52288	-0.72756	-0.58917	-0.51108	-0.80119	-0.8741	-0.99881	-0.91572	-0.7206	-0.73154	-0.48695	-0.79025	0.14444	-0.26502	-0.6465	-0.50075	-1.1523	0.72092	0.67494	-0.18675	0.57725	1.04124	0.99426	-0.40505	-0.24017	-0.23767	-0.58944	0.41202	0.28598	0.24656		0
0.6905	0.46923	-1.34914	0.15346	0.25644	0.33157	-0.80119	-0.00327	-0.99881	-0.01245	0.97568	-1.57514	0.31591	0.04834	-1.4564	-1.78651	-0.6465	-1.26773	0.91098	0.72092	1.2933	0.53669	-0.13915	1.04124	-0.63661	0.39108	-1.04207	-1.05518	-0.58944	0.41202	-0.52907	-1.3596		0
-0.1381	0.46923	0.30338	1.03449	1.10204	1.17422	0.97232	0.86755	0.83983	0.89081	0.97568	0.95566	1.11878	0.88693	0.94485	1.25647	1.02581	1.03321	-1.1523	-0.81936	-1.18017	-0.9102	-0.85556	-1.52925	0.99426	1.18722	0.56173	1.39734	-0.58944	0.41202	1.10103	1.04964		0
-1.7953	-2.04944	-0.52288	-2.48962	-2.28038	-2.19638	0.97232	0.86755	0.83983	0.89081	0.97568	-2.41874	-2.09268	0.88693	0.94485	1.25647	1.02581	1.03321	-0.46454	-0.81936	-1.18017	-0.9102	-0.85556	1.04124	-2.26747	-1.99732	1.36363	-1.87268	1.08151	1.21394	1.10103	1.04964		0
1.5191	1.30878	1.12963	0.15346	0.25644	1.17422	0.97232	0.86755	0.83983	0.89081	0.12754	-0.73154	1.11878	0.88693	-0.65598	0.49572	0.18965	1.03321	-1.1523	-0.81936	-1.18017	-0.9102	-0.85556	-1.52925	0.99426	-0.40505	1.36363	0.57983	1.08151	1.21394	-0.52907	1.04964		0
1.5191	1.30878	1.12963	1.03449	1.10204	1.17422	0.97232	0.86755	0.83983	0.89081	0.97568	0.95566	1.11878	0.88693	0.94485	1.25647	1.02581	1.03321	0.91098	2.26121	0.67494	1.26013	1.29366	1.04124	0.99426	1.18722	0.56173	-0.23767	0.24604	0.41202	1.10103	0.24656		0
-0.1381	-0.37033	-0.52288	-0.72756	-0.58917	-0.51108	-0.80119	0.86755	0.83983	0.89081	0.97568	0.95566	-0.48695	0.88693	0.14444	-0.26502	1.02581	1.03321	-1.1523	-0.81936	-1.18017	-0.9102	-0.85556	1.04124	-0.63661	0.39108	0.56173	1.39734	0.24604	-1.99375	-2.15916	1.04964		0
-0.9667	-0.37033	-1.34914	-0.72756	-0.58917	-0.51108	-1.68794	-1.74492	-1.91812	-1.81898	-1.56874	-1.57514	-1.28981	-0.79025	-0.65598	-1.02576	-1.48266	-0.50075	0.91098	0.72092	0.67494	0.53669	1.29366	0.39862	-1.45204	-1.20118	-1.84397	-1.05518	-1.42492	-1.99375	-1.34411	-2.16268		0
1.5191	0.46923	0.30338	-0.72756	-0.58917	1.17422	-2.57469	0.86755	-0.99881	-0.01245	0.12754	0.95566	0.31591	0.04834	-0.65598	-0.26502	-1.48266	0.26623	1.59874	1.49107	0.05657	1.98358	1.29366	0.39862	0.99426	0.39108	0.56173	0.57983	-1.42492	1.21394	1.10103	1.04964		0
-0.1381	-0.37033	-0.52288	-0.72756	0.25644	0.33157	0.08556	0.86755	0.83983	0.89081	0.97568	0.11206	0.31591	-0.79025	-0.65598	-0.26502	-0.6465	-0.50075	-1.1523	-0.81936	1.2933	-0.9102	-0.85556	-0.244	0.99426	0.39108	1.36363	1.39734	1.08151	-0.38991	1.10103	1.04964		0
-0.1381	0.46923	0.30338	0.15346	0.25644	0.33157	0.08556	0.86755	0.83983	0.89081	-0.7206	0.11206	-0.48695	-0.79025	-0.65598	-1.78651	-0.6465	-0.50075	0.91098	-0.04922	1.2933	-0.18675	-0.13915	1.04124	-0.63661	-0.40505	-1.84397	-1.05518	-0.58944	-0.38991	-0.52907	-1.3596		0
1.5191	1.30878	1.12963	1.03449	1.10204	1.17422	0.97232	0.86755	0.83983	0.89081	0.97568	0.95566	1.11878	0.88693	0.94485	1.25647	0.18965	0.26623	-1.1523	-0.81936	1.2933	-0.9102	-0.85556	1.04124	0.17882	1.18722	1.36363	1.39734	1.08151	1.21394	1.10103	1.04964		0
1.5191	1.30878	1.12963	1.03449	1.10204	1.17422	0.97232	0.86755	0.83983	0.89081	0.97568	0.95566	1.11878	0.88693	0.94485	1.25647	1.02581	1.03321	-1.1523	-0.81936	-1.18017	-0.9102	-0.85556	-1.52925	0.99426	1.18722	1.36363	1.39734	1.08151	1.21394	1.10103	1.04964		0
1.5191	1.30878	1.12963	1.03449	1.10204	1.17422	0.97232	0.86755	0.83983	0.89081	0.97568	0.95566	1.11878	0.88693	0.94485	-0.26502	1.02581	1.03321	-1.1523	-0.81936	-1.18017	-0.9102	-0.85556	-1.52925	0.99426	1.18722	1.36363	1.39734	1.08151	-1.99375	1.10103	1.04964		0
1.5191	1.30878	1.12963	1.03449	1.10204	1.17422	0.97232	0.86755	0.83983	0.89081	0.97568	-0.73154	-0.48695	0.88693	0.94485	1.25647	1.02581	1.03321	-1.1523	-0.81936	-1.18017	-0.9102	-0.85556	-1.52925	0.99426	1.18722	1.36363	-1.87268	1.08151	1.21394	1.10103	1.04964		0
-1.7953	-2.04944	-2.1754	-2.48962	-0.58917	-0.51108	-0.80119	0.86755	0.83983	-0.01245	0.97568	-0.73154	1.11878	0.88693	0.94485	-1.78651	1.02581	1.03321	0.91098	2.26121	1.2933	1.26013	2.01006	1.04124	0.99426	-1.99732	-1.84397	-1.87268	1.08151	-1.99375	-2.15916	0.24656		0
1.5191	1.30878	1.12963	1.03449	1.10204	1.17422	0.97232	0.86755	0.83983	0.89081	0.97568	0.95566	1.11878	0.88693	0.94485	1.25647	1.02581	1.03321	-1.1523	-0.81936	-1.18017	-0.9102	-0.85556	-1.52925	0.99426	1.18722	1.36363	1.39734	1.08151	1.21394	1.10103	1.04964		0
0.6905	1.30878	1.12963	1.03449	1.10204	1.17422	0.97232	-0.00327	-0.99881	-0.01245	-0.7206	0.95566	1.11878	0.88693	0.94485	0.49572	1.02581	1.03321	1.59874	-0.04922	1.2933	1.98358	2.01006	1.04124	0.17882	1.18722	-0.24017	-0.23767	1.08151	-1.19183	-1.34411	1.04964		0
-0.1381	-0.37033	-1.34914	-0.72756	-0.58917	-0.51108	-0.80119	-0.8741	-0.99881	-0.91572	-0.7206	-1.57514	-1.28981	0.04834	0.14444	-0.26502	0.18965	0.26623	0.22322	-0.81936	0.05657	-0.9102	-0.85556	-0.88663	0.17882	-1.20118	-1.04207	-1.05518	-1.42492	-1.19183	-0.52907	-0.55652		0
-1.7953	-2.04944	-2.1754	-2.48962	-1.43477	-1.35373	-1.68794	-2.61574	-2.83744	-2.72225	-0.7206	-2.41874	-2.09268	-2.46742	-2.25682	-1.78651	-2.31881	-2.03471	-1.1523	-0.81936	-1.18017	-0.9102	-0.85556	-1.52925	-0.63661	-0.40505	-0.24017	-1.87268	-2.2604	-1.99375	-0.52907	-2.16268		0
0.6905	0.46923	1.12963	1.03449	1.10204	1.17422	0.97232	0.86755	0.83983	0.89081	0.97568	0.95566	-0.48695	-1.62883	-1.4564	0.49572	-1.48266	0.26623	-1.1523	-0.81936	1.2933	-0.9102	-0.85556	-0.88663	0.99426	1.18722	1.36363	1.39734	1.08151	1.21394	1.10103	1.04964		0
-0.1381	-0.37033	0.30338	1.03449	-2.28038	1.17422	-2.57469	-0.8741	-0.99881	-0.01245	0.12754	-2.41874	0.31591	0.04834	0.14444	-1.78651	0.18965	0.26623	-1.1523	-0.81936	-1.18017	-0.9102	-0.85556	-1.52925	0.99426	1.18722	1.36363	1.39734	1.08151	1.21394	1.10103	1.04964		0
-1.7953	1.30878	1.12963	1.03449	1.10204	0.33157	0.97232	0.86755	0.83983	0.89081	0.97568	0.95566	1.11878	-1.62883	-1.4564	-0.26502	-0.6465	-1.26773	0.22322	-0.81936	1.2933	1.98358	2.01006	1.04124	0.99426	1.18722	-0.24017	-0.23767	1.08151	1.21394	1.10103	-1.3596		0
-0.1381	-0.37033	-0.52288	-0.72756	-0.58917	-0.51108	-0.80119	-0.00327	-0.07949	-0.01245	0.12754	0.11206	0.31591	0.04834	0.14444	0.49572	0.18965	0.26623	0.91098	1.49107	0.67494	1.26013	1.29366	0.39862	0.17882	0.39108	-1.04207	-0.23767	0.24604	0.41202	0.28598	0.24656		0
-0.1381	-0.37033	0.30338	-0.72756	-0.58917	-0.51108	0.08556	-0.00327	-0.07949	-0.01245	0.12754	0.11206	0.31591	0.04834	-0.65598	-0.26502	0.18965	0.26623	0.22322	0.72092	0.67494	1.26013	0.57725	-0.244	0.17882	-1.20118	0.56173	-0.23767	1.08151	-0.38991	-0.52907	-0.55652		0
0.6905	-0.37033	0.30338	1.03449	1.10204	1.17422	0.97232	0.86755	0.83983	0.89081	0.97568	0.95566	1.11878	0.88693	0.94485	1.25647	1.02581	1.03321	1.59874	1.49107	1.2933	1.98358	2.01006	1.04124	0.99426	1.18722	0.56173	0.57983	1.08151	1.21394	0.28598	0.24656		0
1.5191	1.30878	1.12963	1.03449	1.10204	1.17422	0.97232	0.86755	0.83983	0.89081	0.97568	0.95566	1.11878	0.88693	0.94485	-0.26502	-0.6465	-0.50075	-1.1523	-0.81936	1.2933	-0.9102	-0.85556	1.04124	0.99426	-0.40505	0.56173	-0.23767	1.08151	-0.38991	1.10103	1.04964		0
-0.9667	-1.20989	-1.34914	-0.72756	-1.43477	-1.35373	-1.68794	-1.74492	-1.91812	-0.91572	-1.56874	-0.73154	-1.28981	-0.79025	-0.65598	-1.02576	-1.48266	-0.50075	0.22322	0.72092	0.05657	0.53669	-0.13915	-0.244	-0.63661	-1.20118	-0.24017	-0.23767	-1.42492	-0.38991	-1.34411	-0.55652		0
0.6905	0.46923	1.12963	1.03449	1.10204	1.17422	0.08556	0.86755	0.83983	0.89081	0.97568	0.95566	1.11878	0.88693	0.94485	1.25647	1.02581	1.03321	-1.1523	-0.81936	-1.18017	-0.9102	-0.85556	-1.52925	0.99426	-1.99732	0.56173	0.57983	1.08151	1.21394	1.10103	1.04964		0
-0.1381	-0.37033	-1.34914	-0.72756	-0.58917	-0.51108	-0.80119	-0.00327	-0.07949	-0.01245	-0.7206	0.11206	0.31591	0.04834	0.14444	-0.26502	0.18965	0.26623	0.22322	-0.81936	1.2933	-0.9102	-0.85556	1.04124	0.17882	0.39108	-1.84397	-0.23767	0.24604	0.41202	-0.52907	1.04964		0
-0.1381	-0.37033	-0.52288	-1.60859	-0.58917	-1.35373	-0.80119	0.86755	0.83983	0.89081	0.97568	-0.73154	-0.48695	-0.79025	-0.65598	-0.26502	-0.6465	-0.50075	-0.46454	-0.81936	1.2933	-0.9102	-0.85556	1.04124	0.99426	1.18722	1.36363	1.39734	1.08151	-0.38991	0.28598	1.04964		0
-0.1381	-0.37033	0.30338	0.15346	0.25644	-0.51108	0.97232	0.86755	0.83983	0.89081	0.97568	0.11206	1.11878	-1.62883	-0.65598	-0.26502	0.18965	0.26623	0.22322	-0.81936	-0.5618	-0.9102	-0.85556	1.04124	0.17882	-0.40505	-0.24017	-0.23767	0.24604	-0.38991	1.10103	0.24656		0
-0.1381	-0.37033	1.12963	0.15346	0.25644	-0.51108	0.97232	0.86755	0.83983	0.89081	0.97568	0.95566	1.11878	0.88693	0.94485	1.25647	1.02581	1.03321	-1.1523	-0.81936	-1.18017	-0.9102	-0.85556	-0.88663	0.99426	0.39108	1.36363	0.57983	1.08151	0.41202	1.10103	0.24656		0
1.5191	1.30878	1.12963	1.03449	1.10204	1.17422	0.97232	0.86755	0.83983	0.89081	0.97568	0.11206	0.31591	0.88693	0.94485	1.25647	1.02581	1.03321	-1.1523	-0.81936	-1.18017	-0.9102	-0.85556	-1.52925	0.99426	1.18722	0.56173	1.39734	1.08151	0.41202	1.10103	1.04964		0
0.6905	0.46923	0.30338	0.15346	0.25644	0.33157	0.08556	-0.8741	-0.99881	-0.01245	-0.7206	-0.73154	-0.48695	-0.79025	-0.65598	-0.26502	-0.6465	-0.50075	0.91098	0.72092	0.05657	0.53669	0.57725	0.39862	-0.63661	-0.40505	-1.84397	-0.23767	-0.58944	-0.38991	-0.52907	-0.55652		0
-1.7953	-2.04944	-2.1754	-2.48962	1.10204	-2.19638	-2.57469	-0.8741	-0.99881	-0.91572	-0.7206	-0.73154	-2.09268	0.04834	-2.25682	-1.78651	-0.6465	-2.03471	-1.1523	2.26121	1.2933	1.98358	2.01006	1.04124	-0.63661	-0.40505	-0.24017	-0.23767	-0.58944	-0.38991	-0.52907	-0.55652		0
-0.9667	-1.20989	-1.34914	-1.60859	-1.43477	-1.35373	-0.80119	-1.74492	-1.91812	-1.81898	-0.7206	-2.41874	-1.28981	0.88693	0.94485	-1.78651	1.02581	1.03321	0.22322	0.72092	1.2933	0.53669	1.29366	1.04124	-0.63661	-1.20118	-1.84397	-1.87268	-1.42492	-0.38991	-0.52907	-0.55652		0
-0.1381	-0.37033	1.12963	1.03449	1.10204	0.33157	0.97232	-0.00327	-0.07949	-0.01245	0.12754	0.95566	1.11878	0.88693	0.94485	1.25647	1.02581	1.03321	1.59874	-0.81936	1.2933	1.98358	-0.85556	1.04124	-0.63661	-0.40505	-1.04207	-1.05518	-0.58944	-0.38991	-0.52907	-0.55652		0
1.5191	1.30878	1.12963	1.03449	1.10204	1.17422	0.97232	-0.00327	0.83983	0.89081	0.97568	0.95566	0.31591	-2.46742	0.14444	0.49572	1.02581	1.03321	-1.1523	-0.81936	-1.18017	-0.9102	-0.85556	-1.52925	0.99426	1.18722	0.56173	1.39734	1.08151	1.21394	1.10103	1.04964		0
1.5191	1.30878	1.12963	0.15346	1.10204	1.17422	0.97232	0.86755	0.83983	-0.01245	0.97568	0.95566	-0.48695	-0.79025	-1.4564	-0.26502	-0.6465	-0.50075	-0.46454	-0.04922	0.05657	1.26013	1.29366	0.39862	0.99426	1.18722	0.56173	1.39734	1.08151	1.21394	1.10103	1.04964		0
-0.1381	-0.37033	-0.52288	1.03449	-0.58917	-0.51108	0.97232	0.86755	0.83983	0.89081	0.97568	0.95566	1.11878	0.88693	0.94485	-0.26502	1.02581	1.03321	-1.1523	-0.81936	0.05657	-0.9102	-0.85556	-1.52925	0.99426	1.18722	1.36363	1.39734	1.08151	1.21394	1.10103	1.04964		0
1.5191	1.30878	1.12963	1.03449	1.10204	1.17422	0.97232	0.86755	0.83983	0.89081	0.97568	0.95566	1.11878	0.88693	0.94485	1.25647	1.02581	1.03321	-1.1523	-0.81936	-1.18017	-0.9102	-0.85556	1.04124	0.99426	1.18722	1.36363	1.39734	-2.2604	-1.99375	-2.15916	-2.16268		0
-1.7953	-2.04944	-2.1754	-2.48962	-2.28038	-2.19638	-2.57469	0.86755	0.83983	0.89081	0.97568	0.95566	1.11878	0.88693	0.94485	1.25647	1.02581	1.03321	1.59874	2.26121	1.2933	1.98358	2.01006	1.04124	0.99426	1.18722	1.36363	1.39734	1.08151	1.21394	1.10103	1.04964		0
0.6905	1.30878	1.12963	1.03449	1.10204	0.33157	0.97232	0.86755	0.83983	0.89081	0.97568	0.95566	0.31591	0.88693	0.94485	-0.26502	1.02581	1.03321	0.22322	-0.81936	0.67494	-0.9102	-0.85556	1.04124	0.99426	1.18722	0.56173	0.57983	1.08151	1.21394	1.10103	1.04964		0
1.5191	1.30878	1.12963	1.03449	1.10204	1.17422	0.97232	0.86755	0.83983	0.89081	0.97568	0.95566	1.11878	0.88693	0.94485	1.25647	1.02581	1.03321	0.91098	-0.81936	0.67494	-0.9102	-0.85556	1.04124	0.99426	1.18722	-0.24017	-0.23767	1.08151	1.21394	1.10103	-0.55652		0
-0.1381	-0.37033	1.12963	-0.72756	0.25644	-0.51108	0.97232	-0.8741	-0.99881	-0.91572	-0.7206	-0.73154	-0.48695	-0.79025	-0.65598	-0.26502	-0.6465	-0.50075	1.59874	2.26121	1.2933	0.53669	2.01006	1.04124	-0.63661	-1.20118	-1.04207	-1.05518	-1.42492	-0.38991	-0.52907	-1.3596		0
-0.1381	0.46923	-0.52288	-0.72756	1.10204	-0.51108	-0.80119	0.86755	0.83983	0.89081	0.97568	-2.41874	0.31591	-0.79025	-2.25682	-1.78651	-2.31881	-1.26773	1.59874	2.26121	1.2933	1.98358	0.57725	1.04124	-0.63661	0.39108	-0.24017	-1.05518	-0.58944	1.21394	1.10103	-0.55652		0
-0.9667	-0.37033	-1.34914	1.03449	1.10204	0.33157	0.97232	-0.8741	-0.07949	-0.01245	0.97568	0.95566	1.11878	0.88693	0.94485	1.25647	1.02581	1.03321	1.59874	2.26121	1.2933	1.98358	2.01006	1.04124	0.99426	1.18722	0.56173	1.39734	1.08151	1.21394	1.10103	1.04964		0
-0.1381	-0.37033	-2.1754	0.15346	0.25644	0.33157	-0.80119	0.86755	0.83983	0.89081	-0.7206	-1.57514	-0.48695	0.88693	-2.25682	-1.78651	-0.6465	-2.03471	1.59874	2.26121	1.2933	1.98358	2.01006	1.04124	-0.63661	-1.99732	-1.84397	-1.87268	1.08151	1.21394	1.10103	0.24656		0
-0.1381	0.46923	0.30338	-0.72756	-0.58917	-1.35373	-1.68794	-0.8741	-0.99881	-0.01245	-0.7206	-0.73154	-0.48695	0.04834	0.14444	0.49572	1.02581	-0.50075	0.22322	0.72092	0.05657	0.53669	2.01006	-0.244	-2.26747	-1.99732	-0.24017	-0.23767	-0.58944	-0.38991	1.10103	-1.3596		0
-0.1381	-0.37033	-0.52288	0.15346	0.25644	0.33157	0.08556	-0.00327	-0.07949	-0.91572	0.12754	0.11206	0.31591	0.04834	0.14444	-0.26502	0.18965	0.26623	0.91098	-0.04922	1.2933	1.26013	1.29366	1.04124	0.17882	-0.40505	-1.04207	-1.05518	0.24604	0.41202	-0.52907	-0.55652		0
-0.1381	-0.37033	0.30338	0.15346	1.10204	-0.51108	0.97232	-0.00327	-0.07949	0.89081	0.97568	0.95566	0.31591	-0.79025	-0.65598	-0.26502	1.02581	1.03321	1.59874	2.26121	1.2933	0.53669	0.57725	1.04124	0.99426	1.18722	1.36363	-0.23767	1.08151	-0.38991	0.28598	1.04964		0
1.5191	1.30878	1.12963	1.03449	1.10204	1.17422	0.97232	-0.00327	0.83983	0.89081	0.97568	0.95566	1.11878	0.88693	0.94485	1.25647	1.02581	1.03321	0.91098	-0.81936	-1.18017	-0.9102	-0.85556	-0.244	0.99426	0.39108	-0.24017	-0.23767	-0.58944	-0.38991	-0.52907	-0.55652		0
1.5191	1.30878	1.12963	1.03449	1.10204	0.33157	0.08556	-0.8741	-0.99881	-0.91572	-0.7206	-0.73154	-0.48695	0.88693	0.94485	1.25647	1.02581	1.03321	1.59874	0.72092	0.05657	1.98358	0.57725	0.39862	0.99426	1.18722	-0.24017	-0.23767	-0.58944	-0.38991	-0.52907	-0.55652		0
-1.7953	-1.20989	-2.1754	-1.60859	-1.43477	-1.35373	-1.68794	-0.8741	-0.99881	-1.81898	-0.7206	-0.73154	-0.48695	0.88693	0.94485	-1.78651	0.18965	1.03321	1.59874	0.72092	1.2933	1.26013	2.01006	1.04124	-1.45204	-1.20118	-1.84397	-1.87268	-0.58944	-0.38991	-0.52907	-0.55652		0
-0.9667	-1.20989	-1.34914	-1.60859	-1.43477	-1.35373	-1.68794	-0.00327	-0.07949	-0.91572	0.12754	-0.73154	0.31591	0.04834	-0.65598	0.49572	-0.6465	0.26623	0.22322	1.49107	0.67494	1.26013	0.57725	-0.244	-0.63661	-0.40505	-0.24017	-0.23767	-0.58944	-0.38991	-0.52907	0.24656		0
-0.1381	0.46923	0.30338	0.15346	0.25644	-0.51108	0.08556	0.86755	0.83983	0.89081	0.12754	-0.73154	0.31591	-2.46742	-2.25682	-1.78651	-2.31881	0.26623	0.22322	-0.81936	0.05657	-0.9102	-0.85556	1.04124	0.99426	-0.40505	0.56173	-0.23767	1.08151	0.41202	-0.52907	0.24656		0
-0.1381	0.46923	1.12963	1.03449	1.10204	-0.51108	0.97232	0.86755	0.83983	0.89081	0.97568	0.95566	1.11878	0.88693	0.94485	-0.26502	1.02581	1.03321	0.91098	-0.81936	-1.18017	-0.9102	-0.85556	-0.244	0.99426	1.18722	1.36363	-0.23767	1.08151	0.41202	1.10103	-0.55652		0
1.5191	1.30878	1.12963	1.03449	1.10204	1.17422	0.97232	0.86755	0.83983	0.89081	0.97568	0.95566	1.11878	0.88693	0.94485	1.25647	1.02581	1.03321	-1.1523	-0.81936	1.2933	-0.9102	-0.85556	-1.52925	0.99426	1.18722	1.36363	1.39734	1.08151	1.21394	1.10103	1.04964		0
-0.1381	0.46923	1.12963	1.03449	1.10204	0.33157	0.97232	-0.8741	-0.99881	-0.91572	-0.7206	-0.73154	-0.48695	0.88693	0.14444	-1.78651	-2.31881	-2.03471	1.59874	-0.04922	1.2933	-0.18675	1.29366	1.04124	0.99426	1.18722	-1.84397	-0.23767	1.08151	-0.38991	-1.34411	-0.55652		0
-0.1381	1.30878	1.12963	1.03449	1.10204	1.17422	0.97232	0.86755	0.83983	0.89081	0.97568	0.95566	1.11878	0.88693	0.94485	1.25647	1.02581	1.03321	0.22322	-0.81936	-1.18017	-0.9102	-0.85556	-1.52925	0.99426	1.18722	-0.24017	1.39734	1.08151	-1.99375	1.10103	1.04964		0
0.6905	0.46923	0.30338	1.03449	0.25644	0.33157	0.08556	0.86755	0.83983	-0.01245	0.12754	0.95566	-0.48695	0.88693	0.94485	-0.26502	0.18965	1.03321	-1.1523	-0.81936	1.2933	0.53669	-0.85556	1.04124	0.99426	-0.40505	-0.24017	-0.23767	0.24604	0.41202	0.28598	0.24656		0
-0.1381	-0.37033	-0.52288	-0.72756	-0.58917	-0.51108	-0.80119	-0.00327	0.83983	-0.01245	0.12754	0.95566	0.31591	0.88693	-0.65598	-0.26502	1.02581	1.03321	-0.46454	-0.81936	-1.18017	-0.18675	-0.13915	0.39862	0.17882	-0.40505	-1.04207	-1.05518	0.24604	1.21394	-0.52907	-0.55652		0
-0.9667	1.30878	1.12963	1.03449	1.10204	1.17422	0.97232	0.86755	0.83983	0.89081	-2.41688	0.95566	1.11878	0.88693	0.94485	1.25647	1.02581	1.03321	-1.1523	-0.81936	-1.18017	-0.9102	-0.85556	1.04124	0.99426	1.18722	-0.24017	1.39734	1.08151	1.21394	1.10103	1.04964		0
-0.1381	-0.37033	0.30338	0.15346	-0.58917	0.33157	0.08556	-0.8741	-0.07949	-0.01245	-0.7206	0.95566	0.31591	0.04834	-0.65598	-0.26502	0.18965	0.26623	-0.46454	-0.81936	-1.18017	-0.9102	-0.85556	-0.244	-0.63661	-0.40505	0.56173	0.57983	0.24604	0.41202	0.28598	-1.3596		0
-0.1381	-0.37033	0.30338	-0.72756	0.25644	-0.51108	-0.80119	-0.00327	-0.07949	-0.01245	0.12754	0.11206	0.31591	0.88693	0.94485	1.25647	1.02581	1.03321	-1.1523	-0.81936	-1.18017	-0.9102	-0.85556	-1.52925	-1.45204	-0.40505	0.56173	0.57983	-0.58944	0.41202	0.28598	0.24656		0
-1.7953	-2.04944	-1.34914	-0.72756	-0.58917	-0.51108	-0.80119	-0.8741	-0.99881	-0.01245	0.12754	-0.73154	-2.09268	-0.79025	0.94485	-1.78651	-1.48266	-0.50075	1.59874	-0.81936	-1.18017	-0.18675	-0.13915	0.39862	-2.26747	-0.40505	-0.24017	-0.23767	0.24604	-1.19183	1.10103	-0.55652		0
-0.1381	-1.20989	-1.34914	-1.60859	0.25644	0.33157	-0.80119	0.86755	0.83983	0.89081	0.12754	-1.57514	-1.28981	0.04834	-0.65598	-0.26502	0.18965	-0.50075	0.22322	0.72092	0.05657	0.53669	0.57725	-0.244	-0.63661	-1.20118	-0.24017	-0.23767	0.24604	-0.38991	-0.52907	-0.55652		0
1.5191	1.30878	0.30338	0.15346	0.25644	0.33157	0.97232	0.86755	0.83983	0.89081	0.97568	0.11206	0.31591	0.88693	0.94485	0.49572	0.18965	0.26623	1.59874	1.49107	1.2933	-0.9102	-0.85556	1.04124	0.99426	1.18722	1.36363	1.39734	1.08151	1.21394	1.10103	1.04964		0
-0.1381	0.46923	-2.1754	-0.72756	0.25644	-0.51108	-0.80119	0.86755	0.83983	0.89081	0.97568	0.95566	1.11878	0.88693	0.94485	-0.26502	1.02581	1.03321	1.59874	0.72092	1.2933	0.53669	2.01006	1.04124	0.99426	0.39108	-0.24017	-0.23767	1.08151	-0.38991	-0.52907	1.04964		0
-0.1381	-0.37033	-0.52288	-0.72756	-0.58917	0.33157	0.08556	-0.8741	-0.99881	-0.91572	-0.7206	0.11206	0.31591	0.04834	0.14444	0.49572	0.18965	0.26623	0.22322	0.72092	0.05657	0.53669	0.57725	-0.244	0.17882	-0.40505	0.56173	-0.23767	-0.58944	-0.38991	-0.52907	-0.55652		0
-0.1381	-1.20989	0.30338	-0.72756	-1.43477	-1.35373	0.08556	0.86755	0.83983	-0.91572	-0.7206	0.11206	-0.48695	0.88693	0.94485	-1.02576	1.02581	1.03321	0.22322	-0.81936	0.05657	-0.9102	-0.85556	0.39862	0.99426	1.18722	1.36363	-0.23767	0.24604	0.41202	1.10103	-0.55652		0
-0.9667	-1.20989	-0.52288	0.15346	0.25644	-0.51108	-0.80119	-0.8741	-0.99881	-0.91572	-0.7206	0.95566	1.11878	0.88693	0.94485	-0.26502	-0.6465	0.26623	-0.46454	-0.04922	1.2933	1.26013	2.01006	1.04124	-0.63661	0.39108	-1.84397	-0.23767	0.24604	-1.19183	1.10103	-0.55652		0
-0.1381	-0.37033	-0.52288	-0.72756	-0.58917	0.33157	0.08556	-0.8741	0.83983	0.89081	0.97568	0.95566	1.11878	0.88693	0.94485	1.25647	1.02581	1.03321	0.22322	-0.81936	-1.18017	-0.9102	-0.85556	-0.244	0.99426	1.18722	-0.24017	-0.23767	-0.58944	-0.38991	-0.52907	-0.55652		0
1.5191	1.30878	1.12963	1.03449	1.10204	1.17422	0.97232	0.86755	0.83983	0.89081	0.97568	0.95566	1.11878	0.88693	0.94485	1.25647	1.02581	1.03321	-1.1523	-0.81936	-1.18017	-0.9102	-0.85556	-1.52925	0.99426	1.18722	1.36363	1.39734	1.08151	1.21394	1.10103	1.04964		0
-1.7953	-1.20989	-0.52288	0.15346	0.25644	0.33157	0.08556	-0.00327	-0.07949	-0.01245	0.12754	0.95566	1.11878	0.88693	0.94485	1.25647	1.02581	1.03321	1.59874	-0.81936	1.2933	-0.9102	1.29366	1.04124	0.17882	-1.20118	-1.84397	-0.23767	0.24604	0.41202	-1.34411	-2.16268		0
-0.1381	-0.37033	-0.52288	-0.72756	1.10204	-0.51108	0.08556	0.86755	0.83983	0.89081	0.97568	0.95566	-2.09268	0.88693	0.94485	-0.26502	-1.48266	-1.26773	-1.1523	-0.81936	-1.18017	-0.9102	-0.85556	1.04124	0.99426	1.18722	1.36363	1.39734	1.08151	1.21394	1.10103	0.24656		0
0.6905	0.46923	-0.52288	0.15346	0.25644	-0.51108	0.97232	-0.00327	-0.07949	-0.01245	0.12754	0.11206	0.31591	0.04834	0.14444	-1.02576	-0.6465	0.26623	0.91098	1.49107	1.2933	1.98358	1.29366	1.04124	0.17882	0.39108	-0.24017	-1.87268	0.24604	1.21394	0.28598	0.24656		0
-0.1381	-0.37033	1.12963	1.03449	0.25644	0.33157	0.97232	0.86755	0.83983	0.89081	0.97568	-0.73154	-1.28981	0.88693	0.94485	1.25647	1.02581	1.03321	1.59874	0.72092	1.2933	1.26013	1.29366	1.04124	0.99426	1.18722	0.56173	-0.23767	1.08151	1.21394	1.10103	-0.55652		0
-1.7953	-0.37033	0.30338	-0.72756	-0.58917	-0.51108	0.97232	-0.00327	-0.07949	0.89081	-0.7206	-0.73154	-0.48695	-0.79025	-0.65598	0.49572	0.18965	1.03321	-1.1523	2.26121	0.05657	1.26013	0.57725	-0.244	-0.63661	-0.40505	0.56173	0.57983	0.24604	0.41202	-0.52907	1.04964		0
-1.7953	-0.37033	-0.52288	-0.72756	-0.58917	-0.51108	0.08556	-0.00327	-0.07949	0.89081	0.12754	0.11206	0.31591	0.04834	0.14444	-0.26502	0.18965	1.03321	0.91098	0.72092	0.67494	1.26013	1.29366	1.04124	0.99426	0.39108	0.56173	-0.23767	0.24604	-0.38991	0.28598	1.04964		0
-1.7953	0.46923	0.30338	1.03449	1.10204	1.17422	0.97232	0.86755	0.83983	0.89081	0.97568	0.95566	1.11878	0.88693	0.94485	1.25647	1.02581	1.03321	0.91098	2.26121	0.05657	1.98358	0.57725	1.04124	0.99426	0.39108	1.36363	1.39734	1.08151	1.21394	1.10103	1.04964		0
1.5191	0.46923	1.12963	0.15346	1.10204	0.33157	0.97232	0.86755	-0.07949	0.89081	0.97568	0.11206	1.11878	0.04834	0.94485	0.49572	1.02581	0.26623	1.59874	1.49107	1.2933	1.26013	2.01006	0.39862	0.99426	0.39108	1.36363	0.57983	0.24604	1.21394	0.28598	1.04964		0
-0.1381	-0.37033	-1.34914	0.15346	0.25644	-0.51108	-0.80119	-0.8741	-0.99881	-0.91572	-1.56874	-0.73154	-1.28981	-1.62883	-1.4564	-1.78651	-2.31881	-2.03471	1.59874	2.26121	1.2933	1.98358	2.01006	0.39862	-0.63661	-1.20118	-1.84397	-0.23767	-2.2604	-1.99375	-2.15916	0.24656		0
-0.9667	-0.37033	-0.52288	-0.72756	-0.58917	-1.35373	0.97232	-0.8741	-0.99881	-0.91572	-0.7206	-0.73154	-2.09268	-0.79025	-0.65598	-1.78651	-0.6465	-1.26773	-0.46454	-0.04922	1.2933	-0.9102	-0.13915	1.04124	-0.63661	-0.40505	-0.24017	-0.23767	-0.58944	-0.38991	-0.52907	-0.55652		0
0.6905	0.46923	0.30338	0.15346	0.25644	0.33157	0.08556	-1.74492	-0.99881	-1.81898	-0.7206	-0.73154	-0.48695	0.04834	-0.65598	-0.26502	-0.6465	-0.50075	-0.46454	-0.81936	0.05657	-0.9102	-0.85556	0.39862	0.17882	0.39108	-0.24017	0.57983	0.24604	-1.99375	-2.15916	-0.55652		0
1.5191	1.30878	1.12963	1.03449	1.10204	1.17422	0.97232	0.86755	0.83983	0.89081	0.97568	0.95566	1.11878	0.88693	0.94485	-0.26502	0.18965	1.03321	-1.1523	-0.81936	0.05657	-0.9102	-0.85556	-0.244	0.99426	-1.99732	-0.24017	-0.23767	1.08151	-1.19183	1.10103	-2.16268		0
-0.1381	-0.37033	-0.52288	-1.60859	0.25644	0.33157	-0.80119	-0.00327	-0.07949	-0.01245	-0.7206	0.95566	0.31591	0.04834	-0.65598	-0.26502	1.02581	1.03321	-1.1523	-0.81936	-0.5618	-0.18675	-0.85556	-0.88663	0.17882	-0.40505	-0.24017	-0.23767	0.24604	-0.38991	0.28598	0.24656		0
0.6905	0.46923	1.12963	1.03449	1.10204	1.17422	0.97232	-0.8741	-0.99881	-0.91572	-0.7206	-2.41874	-0.48695	-0.79025	-0.65598	-0.26502	-0.6465	-0.50075	1.59874	2.26121	1.2933	1.98358	2.01006	1.04124	-1.45204	-1.20118	-1.04207	-0.23767	-1.42492	-1.19183	-1.34411	-1.3596		0
-0.1381	0.46923	-1.34914	1.03449	-0.58917	-1.35373	0.97232	-0.00327	-0.99881	-0.91572	-0.7206	0.11206	0.31591	0.04834	0.14444	0.49572	0.18965	0.26623	1.59874	-0.04922	1.2933	0.53669	-0.13915	1.04124	-0.63661	-0.40505	0.56173	-0.23767	-0.58944	-1.19183	-0.52907	-0.55652		0
1.5191	1.30878	1.12963	1.03449	1.10204	1.17422	0.97232	0.86755	0.83983	0.89081	0.97568	0.95566	1.11878	0.88693	0.94485	1.25647	1.02581	1.03321	-1.1523	-0.81936	-1.18017	-0.9102	-0.85556	-1.52925	0.99426	1.18722	1.36363	0.57983	1.08151	1.21394	1.10103	1.04964		0
-0.1381	-0.37033	-0.52288	-0.72756	-0.58917	-0.51108	-0.80119	-0.8741	-0.99881	-0.91572	-0.7206	-0.73154	-0.48695	0.04834	0.14444	-1.78651	-0.6465	-0.50075	1.59874	1.49107	-0.5618	1.98358	2.01006	0.39862	-0.63661	-0.40505	-1.04207	-1.87268	-0.58944	-1.99375	-1.34411	-1.3596		0
-0.9667	-1.20989	-0.52288	-0.72756	-2.28038	-1.35373	-1.68794	0.86755	-0.07949	-0.01245	-0.7206	-1.57514	-0.48695	0.88693	0.94485	-1.02576	-0.6465	0.26623	0.22322	-0.04922	0.67494	1.98358	1.29366	1.04124	-0.63661	0.39108	-0.24017	-1.05518	-1.42492	-1.19183	-0.52907	-0.55652		0
-1.7953	-1.20989	-0.52288	0.15346	1.10204	1.17422	0.08556	-2.61574	-1.91812	-0.91572	0.12754	-2.41874	-1.28981	-0.79025	0.14444	1.25647	0.18965	-1.26773	1.59874	1.49107	0.05657	-0.18675	-0.85556	-1.52925	-2.26747	-1.20118	-0.24017	-0.23767	-0.58944	-1.19183	-2.15916	-1.3596		0
-1.7953	-2.04944	-2.1754	1.03449	1.10204	-2.19638	0.97232	0.86755	0.83983	0.89081	0.97568	0.95566	1.11878	0.88693	0.94485	1.25647	1.02581	1.03321	1.59874	-0.81936	1.2933	1.98358	2.01006	1.04124	0.99426	-1.99732	-1.84397	1.39734	1.08151	-1.99375	-2.15916	-2.16268		0
0.6905	-0.37033	-1.34914	0.15346	-1.43477	-0.51108	-0.80119	0.86755	0.83983	0.89081	-0.7206	-0.73154	-0.48695	0.04834	0.14444	0.49572	-0.6465	1.03321	1.59874	0.72092	1.2933	1.98358	2.01006	1.04124	0.99426	1.18722	1.36363	1.39734	1.08151	-0.38991	1.10103	1.04964		0
-0.9667	-1.20989	-1.34914	-0.72756	-0.58917	-1.35373	-1.68794	-0.8741	-1.91812	-1.81898	-1.56874	-1.57514	-1.28981	-1.62883	-0.65598	-1.78651	-1.48266	-1.26773	1.59874	2.26121	1.2933	1.98358	2.01006	1.04124	-0.63661	-0.40505	-1.04207	-1.05518	-1.42492	-1.19183	-1.34411	-0.55652		0
-0.1381	1.30878	0.30338	1.03449	1.10204	-0.51108	0.97232	0.86755	0.83983	0.89081	-0.7206	0.95566	-0.48695	0.88693	-0.65598	-0.26502	-0.6465	-0.50075	1.59874	0.72092	1.2933	1.98358	0.57725	1.04124	0.99426	1.18722	-0.24017	-0.23767	1.08151	-0.38991	-0.52907	-0.55652		0
-0.1381	-0.37033	1.12963	0.15346	0.25644	0.33157	0.08556	0.86755	0.83983	0.89081	0.97568	0.95566	1.11878	0.88693	0.94485	1.25647	1.02581	1.03321	0.22322	1.49107	0.67494	0.53669	1.29366	-0.244	0.99426	1.18722	1.36363	1.39734	1.08151	1.21394	1.10103	1.04964		0
1.5191	-0.37033	-0.52288	-0.72756	-0.58917	-0.51108	-0.80119	-0.00327	-0.07949	-0.01245	-0.7206	0.11206	-0.48695	0.88693	-0.65598	-1.02576	-0.6465	-0.50075	1.59874	2.26121	1.2933	1.26013	1.29366	0.39862	-0.63661	0.39108	-0.24017	0.57983	0.24604	-0.38991	-0.52907	-0.55652		0
-0.1381	0.46923	0.30338	0.15346	0.25644	0.33157	0.08556	-0.8741	-0.99881	-0.01245	0.97568	0.95566	1.11878	-0.79025	-0.65598	1.25647	0.18965	0.26623	0.22322	-0.04922	1.2933	1.26013	2.01006	1.04124	0.99426	-0.40505	-0.24017	-0.23767	0.24604	0.41202	1.10103	0.24656		0
-1.7953	-2.04944	-2.1754	-2.48962	-2.28038	-2.19638	-2.57469	-0.00327	-0.07949	0.89081	-0.7206	-0.73154	-0.48695	0.04834	0.14444	-0.26502	0.18965	0.26623	1.59874	2.26121	1.2933	1.98358	2.01006	1.04124	0.99426	1.18722	1.36363	-0.23767	-0.58944	1.21394	1.10103	1.04964		0
-0.1381	-0.37033	-0.52288	0.15346	0.25644	-0.51108	-1.68794	-1.74492	-0.99881	-1.81898	-0.7206	0.11206	-2.09268	-2.46742	-2.25682	-1.78651	-2.31881	-2.03471	-1.1523	-0.81936	-1.18017	-0.9102	-0.85556	-0.244	-1.45204	-1.99732	-1.04207	-1.87268	-1.42492	-1.99375	-0.52907	-0.55652		0
0.6905	-0.37033	-0.52288	0.15346	0.25644	0.33157	-0.80119	-0.8741	-0.99881	-0.01245	-0.7206	-0.73154	0.31591	0.88693	0.94485	-0.26502	0.18965	0.26623	0.91098	0.72092	1.2933	0.53669	0.57725	1.04124	0.99426	-0.40505	-1.04207	-0.23767	0.24604	-0.38991	-0.52907	-0.55652		0
1.5191	1.30878	0.30338	1.03449	0.25644	1.17422	0.97232	-0.8741	-0.99881	-0.91572	-0.7206	0.11206	-2.09268	-2.46742	-2.25682	-1.78651	-1.48266	-1.26773	0.91098	0.72092	0.67494	0.53669	0.57725	-0.244	0.99426	-1.20118	0.56173	0.57983	-0.58944	-0.38991	-0.52907	-0.55652		0
1.5191	1.30878	1.12963	1.03449	1.10204	0.33157	0.97232	-0.00327	-0.07949	-0.01245	0.12754	0.95566	0.31591	0.04834	-1.4564	-1.78651	0.18965	0.26623	0.91098	-0.81936	0.67494	-0.9102	-0.85556	0.39862	0.17882	-1.99732	-0.24017	-0.23767	0.24604	1.21394	-0.52907	-0.55652		0
0.6905	0.46923	1.12963	1.03449	0.25644	0.33157	0.97232	-0.8741	-0.07949	0.89081	0.12754	-0.73154	-0.48695	0.04834	-0.65598	-1.02576	-0.6465	-0.50075	0.22322	0.72092	1.2933	1.98358	2.01006	1.04124	-0.63661	-0.40505	-1.04207	-1.05518	-0.58944	-1.19183	-1.34411	0.24656		0
-0.1381	-0.37033	-0.52288	-0.72756	0.25644	0.33157	0.08556	-0.00327	-0.07949	-0.01245	0.12754	0.11206	-0.48695	0.04834	-0.65598	0.49572	-0.6465	0.26623	0.22322	-0.04922	0.67494	0.53669	-0.13915	0.39862	0.17882	-0.40505	-0.24017	0.57983	-0.58944	-0.38991	0.28598	-0.55652		0
-0.1381	-0.37033	0.30338	-0.72756	-0.58917	-0.51108	0.08556	-0.8741	-0.99881	-0.91572	-0.7206	-1.57514	-1.28981	0.04834	0.14444	-1.02576	-1.48266	-0.50075	1.59874	0.72092	0.67494	0.53669	1.29366	1.04124	0.17882	-0.40505	-1.04207	-1.05518	-0.58944	-0.38991	-0.52907	-1.3596		0
-0.1381	-0.37033	-0.52288	-0.72756	-0.58917	-0.51108	-0.80119	-0.8741	-1.91812	-0.91572	0.12754	-0.73154	0.31591	0.88693	0.14444	-0.26502	-1.48266	-0.50075	0.22322	0.72092	0.67494	-0.18675	0.57725	0.39862	0.17882	-0.40505	0.56173	-0.23767	-1.42492	-0.38991	0.28598	-1.3596		0
-0.1381	1.30878	0.30338	0.15346	0.25644	0.33157	0.08556	0.86755	0.83983	-0.01245	0.12754	0.95566	1.11878	0.88693	0.94485	-0.26502	1.02581	1.03321	-1.1523	-0.81936	1.2933	-0.9102	-0.85556	1.04124	-1.45204	1.18722	1.36363	0.57983	0.24604	0.41202	0.28598	0.24656		0
-0.1381	-1.20989	-1.34914	-1.60859	-0.58917	-0.51108	-0.80119	-0.00327	-0.07949	-0.91572	-0.7206	-1.57514	-2.09268	-1.62883	-1.4564	-1.78651	-1.48266	-1.26773	1.59874	2.26121	1.2933	1.26013	2.01006	1.04124	-0.63661	0.39108	-1.04207	-1.05518	-1.42492	-1.19183	-1.34411	0.24656		0
-0.1381	-0.37033	0.30338	-0.72756	1.10204	-0.51108	0.97232	0.86755	0.83983	0.89081	-0.7206	0.95566	1.11878	0.88693	0.94485	-0.26502	1.02581	1.03321	0.22322	0.72092	1.2933	0.53669	0.57725	1.04124	0.99426	-0.40505	-1.04207	-1.87268	-0.58944	-0.38991	0.28598	-2.16268		0
1.5191	1.30878	1.12963	1.03449	1.10204	1.17422	0.97232	0.86755	0.83983	0.89081	0.97568	0.95566	1.11878	0.88693	0.94485	1.25647	1.02581	1.03321	-1.1523	-0.81936	-1.18017	-0.9102	-0.85556	-0.244	0.99426	-0.40505	1.36363	1.39734	1.08151	1.21394	1.10103	1.04964		0
-0.9667	-1.20989	-0.52288	-1.60859	-0.58917	-0.51108	-0.80119	-0.00327	-0.07949	-0.91572	-0.7206	0.11206	0.31591	0.04834	0.14444	-0.26502	1.02581	1.03321	-0.46454	-0.04922	-0.5618	-0.18675	-0.85556	-0.244	0.17882	1.18722	0.56173	-0.23767	-0.58944	0.41202	-0.52907	0.24656		0
-0.1381	-0.37033	1.12963	0.15346	-0.58917	0.33157	-0.80119	-0.00327	0.83983	-0.01245	0.97568	-2.41874	-2.09268	0.88693	-0.65598	1.25647	1.02581	-0.50075	1.59874	-0.81936	-0.5618	-0.9102	-0.85556	1.04124	0.99426	1.18722	0.56173	1.39734	-0.58944	1.21394	-0.52907	1.04964		0
-1.7953	-2.04944	-2.1754	-2.48962	-2.28038	-2.19638	-0.80119	-0.8741	-0.99881	-1.81898	-2.41688	0.11206	-2.09268	0.88693	0.94485	-1.78651	-2.31881	-0.50075	1.59874	2.26121	1.2933	1.98358	2.01006	1.04124	-2.26747	-1.20118	-0.24017	-1.05518	-1.42492	-1.99375	-2.15916	-2.16268		0
-0.9667	-1.20989	-1.34914	-1.60859	0.25644	-1.35373	0.97232	-0.8741	-0.99881	-0.91572	-0.7206	-1.57514	-1.28981	0.88693	0.94485	-1.78651	1.02581	-2.03471	1.59874	2.26121	1.2933	1.98358	2.01006	1.04124	0.99426	-1.20118	-1.84397	-1.87268	-2.2604	-1.19183	-0.52907	-2.16268		0
-1.7953	-0.37033	-1.34914	-1.60859	-1.43477	-0.51108	-1.68794	-0.00327	-0.99881	-0.91572	-0.7206	0.11206	-0.48695	-0.79025	-0.65598	-1.78651	-0.6465	-0.50075	0.22322	0.72092	0.05657	0.53669	0.57725	-0.244	-0.63661	-1.99732	-1.84397	-1.87268	-0.58944	-1.19183	-2.15916	-2.16268		0
-0.1381	-0.37033	-0.52288	-0.72756	-0.58917	-0.51108	-0.80119	-0.8741	-0.99881	-0.91572	-0.7206	0.11206	-0.48695	0.04834	0.14444	-0.26502	0.18965	0.26623	0.91098	-0.81936	1.2933	1.98358	1.29366	1.04124	-0.63661	-0.40505	-0.24017	-0.23767	-0.58944	-0.38991	0.28598	0.24656		0
-0.9667	-1.20989	-1.34914	-0.72756	-0.58917	-1.35373	0.08556	-0.00327	-0.07949	-0.91572	0.12754	0.95566	0.31591	-1.62883	-1.4564	-0.26502	-0.6465	-0.50075	0.91098	-0.04922	1.2933	-0.18675	-0.85556	1.04124	0.17882	1.18722	-0.24017	-1.05518	0.24604	-0.38991	-0.52907	1.04964		0
-0.9667	-1.20989	-1.34914	-0.72756	-1.43477	-1.35373	-1.68794	-0.8741	-0.99881	-0.91572	-0.7206	-0.73154	-0.48695	-0.79025	-0.65598	-0.26502	-0.6465	-0.50075	0.22322	1.49107	0.05657	0.53669	-0.13915	-0.88663	-0.63661	-0.40505	-0.24017	-0.23767	-0.58944	-0.38991	0.28598	-0.55652		0
1.5191	1.30878	1.12963	1.03449	1.10204	1.17422	0.97232	0.86755	0.83983	0.89081	0.97568	0.95566	1.11878	0.88693	0.94485	1.25647	1.02581	1.03321	-0.46454	-0.81936	-0.5618	-0.9102	-0.85556	-0.88663	-0.63661	1.18722	-1.04207	-0.23767	0.24604	-1.19183	0.28598	0.24656		0
-0.1381	-0.37033	-0.52288	-0.72756	-0.58917	-0.51108	-0.80119	0.86755	0.83983	0.89081	0.97568	0.95566	1.11878	0.88693	0.94485	1.25647	1.02581	1.03321	0.22322	0.72092	0.05657	0.53669	0.57725	-0.244	-0.63661	0.39108	-1.04207	-0.23767	-0.58944	-0.38991	-0.52907	-0.55652		0
-0.1381	-0.37033	-0.52288	0.15346	0.25644	-0.51108	0.08556	-0.8741	-0.99881	-0.01245	-0.7206	-0.73154	-0.48695	-0.79025	-0.65598	-0.26502	-0.6465	-0.50075	0.22322	0.72092	0.67494	1.26013	0.57725	0.39862	-1.45204	-0.40505	-0.24017	-0.23767	-0.58944	-0.38991	-0.52907	-1.3596		0
-0.1381	0.46923	-0.52288	1.03449	1.10204	1.17422	0.97232	0.86755	0.83983	0.89081	0.97568	0.95566	1.11878	0.88693	0.94485	1.25647	1.02581	1.03321	0.91098	1.49107	0.67494	1.98358	2.01006	0.39862	-0.63661	0.39108	-1.04207	-1.05518	-0.58944	-0.38991	-1.34411	0.24656		0
-0.1381	-0.37033	-1.34914	-0.72756	-0.58917	-0.51108	0.08556	-0.8741	-0.99881	-0.91572	-0.7206	-0.73154	-1.28981	0.04834	0.14444	-0.26502	0.18965	0.26623	0.91098	1.49107	1.2933	1.26013	0.57725	1.04124	-0.63661	-1.20118	-1.04207	-1.05518	0.24604	-1.19183	-1.34411	-1.3596		0
-0.9667	-1.20989	-1.34914	0.15346	0.25644	-1.35373	-1.68794	0.86755	0.83983	0.89081	0.97568	0.95566	-1.28981	0.88693	0.94485	-1.78651	1.02581	1.03321	1.59874	2.26121	1.2933	1.98358	2.01006	1.04124	0.99426	-1.20118	-1.04207	-1.87268	1.08151	-1.99375	-2.15916	-2.16268		0
-0.1381	-0.37033	-0.52288	-0.72756	0.25644	-1.35373	-0.80119	-0.8741	-0.99881	-0.91572	-0.7206	-0.73154	-0.48695	-0.79025	-0.65598	0.49572	-0.6465	-0.50075	0.91098	0.72092	0.05657	0.53669	0.57725	0.39862	-0.63661	0.39108	0.56173	-0.23767	-1.42492	-0.38991	-0.52907	0.24656		0
-1.7953	-2.04944	0.30338	0.15346	0.25644	-0.51108	0.08556	-0.00327	-0.07949	-0.01245	0.12754	0.11206	0.31591	0.04834	-0.65598	-1.02576	-0.6465	-1.26773	0.22322	-0.04922	0.67494	0.53669	1.29366	0.39862	0.17882	-0.40505	-0.24017	-0.23767	-0.58944	-1.19183	-0.52907	-0.55652		0
-0.1381	-0.37033	1.12963	-0.72756	1.10204	1.17422	0.97232	-0.8741	-0.99881	-0.91572	-0.7206	0.11206	-1.28981	-0.79025	-0.65598	-1.02576	0.18965	1.03321	0.22322	-0.04922	0.05657	1.26013	-0.13915	1.04124	0.99426	0.39108	-1.04207	-1.05518	-1.42492	-0.38991	-1.34411	-1.3596		0
-1.7953	1.30878	1.12963	1.03449	1.10204	0.33157	0.97232	0.86755	0.83983	0.89081	0.97568	0.95566	1.11878	0.88693	0.94485	1.25647	1.02581	1.03321	0.22322	-0.81936	1.2933	-0.9102	-0.85556	-0.244	0.99426	1.18722	1.36363	1.39734	1.08151	1.21394	1.10103	1.04964		0
-0.1381	-0.37033	-1.34914	1.03449	1.10204	-0.51108	-0.80119	-0.8741	-0.99881	-0.91572	-0.7206	-0.73154	-0.48695	-0.79025	-0.65598	-0.26502	-0.6465	-0.50075	1.59874	1.49107	1.2933	0.53669	2.01006	1.04124	0.17882	-0.40505	-1.84397	-1.87268	-1.42492	-1.99375	-1.34411	-1.3596		0
-0.1381	-0.37033	-0.52288	-0.72756	-0.58917	-0.51108	-0.80119	-0.00327	-0.07949	-0.01245	0.12754	-0.73154	-0.48695	-0.79025	-0.65598	-0.26502	-0.6465	-0.50075	0.91098	1.49107	0.67494	1.26013	1.29366	0.39862	-0.63661	0.39108	-0.24017	-1.05518	-1.42492	-0.38991	-1.34411	-1.3596		0
-0.9667	-0.37033	-0.52288	-0.72756	-0.58917	-1.35373	-0.80119	-0.8741	-0.99881	-0.01245	-0.7206	-0.73154	0.31591	-0.79025	0.14444	-0.26502	0.18965	-1.26773	0.22322	1.49107	-0.5618	1.26013	0.57725	0.39862	-1.45204	-0.40505	-1.04207	-1.05518	-0.58944	-1.19183	-0.52907	0.24656		0
-0.1381	-0.37033	-0.52288	-0.72756	0.25644	-0.51108	-0.80119	0.86755	0.83983	0.89081	0.97568	0.95566	1.11878	0.04834	0.94485	1.25647	1.02581	1.03321	1.59874	2.26121	1.2933	1.98358	2.01006	1.04124	-1.45204	-0.40505	-0.24017	-0.23767	-0.58944	-0.38991	-1.34411	1.04964		0
0.6905	1.30878	1.12963	1.03449	1.10204	0.33157	0.97232	0.86755	0.83983	0.89081	0.97568	0.95566	1.11878	0.88693	0.94485	1.25647	1.02581	1.03321	1.59874	2.26121	1.2933	-0.9102	-0.85556	1.04124	-2.26747	-1.20118	-0.24017	0.57983	-0.58944	-0.38991	-0.52907	-0.55652		0
-0.1381	-0.37033	-0.52288	-0.72756	-0.58917	-0.51108	-0.80119	-1.74492	-1.91812	-0.91572	-0.7206	-1.57514	-0.48695	0.04834	0.14444	-1.02576	-0.6465	-0.50075	0.22322	-0.04922	0.05657	0.53669	0.57725	-0.88663	-0.63661	-0.40505	-1.04207	-1.05518	-0.58944	-1.19183	-1.34411	-0.55652		0
1.5191	1.30878	1.12963	1.03449	1.10204	0.33157	0.97232	0.86755	0.83983	0.89081	0.97568	-1.57514	1.11878	0.04834	-1.4564	-1.02576	0.18965	-1.26773	-1.1523	-0.81936	-1.18017	-0.9102	-0.85556	1.04124	0.17882	-1.20118	-0.24017	-1.05518	-1.42492	-1.19183	-1.34411	-1.3596		0
-0.1381	0.46923	-0.52288	-0.72756	-1.43477	-0.51108	-0.80119	-0.8741	-0.99881	-0.91572	0.12754	-0.73154	-0.48695	-0.79025	-1.4564	-1.78651	-1.48266	-1.26773	-1.1523	-0.81936	-0.5618	-0.9102	-0.85556	-0.244	-1.45204	-1.20118	-0.24017	-0.23767	0.24604	-1.19183	-0.52907	-0.55652		0
0.6905	0.46923	1.12963	0.15346	0.25644	0.33157	0.08556	0.86755	0.83983	0.89081	0.97568	0.95566	-1.28981	0.88693	0.94485	-1.78651	1.02581	-2.03471	-1.1523	-0.81936	-1.18017	-0.9102	-0.85556	-1.52925	-2.26747	-1.99732	-1.84397	-1.87268	-2.2604	-1.99375	-2.15916	-2.16268		0
-0.1381	1.30878	1.12963	1.03449	-0.58917	0.33157	0.08556	0.86755	0.83983	0.89081	0.97568	0.95566	-1.28981	-1.62883	-1.4564	-1.78651	0.18965	-2.03471	0.22322	0.72092	0.67494	0.53669	0.57725	1.04124	-1.45204	-1.20118	-0.24017	-1.05518	-1.42492	1.21394	-1.34411	-1.3596		0
0.6905	0.46923	0.30338	1.03449	1.10204	-0.51108	0.97232	0.86755	0.83983	0.89081	0.12754	0.11206	-2.09268	0.04834	-2.25682	-1.02576	0.18965	0.26623	1.59874	2.26121	1.2933	1.26013	-0.85556	0.39862	0.17882	-1.20118	-1.04207	-1.05518	-1.42492	0.41202	-1.34411	-1.3596		0
0.6905	0.46923	0.30338	0.15346	0.25644	0.33157	0.08556	0.86755	0.83983	0.89081	0.97568	-2.41874	-1.28981	0.88693	-1.4564	-1.78651	-1.48266	-1.26773	-1.1523	-0.81936	-1.18017	-0.9102	-0.85556	-1.52925	-2.26747	-1.20118	-1.04207	-1.05518	-0.58944	-1.19183	-2.15916	-1.3596		0
-0.1381	-0.37033	0.30338	-0.72756	0.25644	1.17422	0.97232	-0.00327	-0.99881	-0.01245	-0.7206	-0.73154	-1.28981	0.04834	-0.65598	-1.02576	-0.6465	-0.50075	0.22322	-0.04922	0.05657	1.26013	0.57725	1.04124	-0.63661	-0.40505	-1.04207	-0.23767	0.24604	-0.38991	0.28598	0.24656		0
-1.7953	-2.04944	-2.1754	-2.48962	-2.28038	-2.19638	-2.57469	-1.74492	-1.91812	-0.91572	-1.56874	-2.41874	-0.48695	-0.79025	-0.65598	-1.78651	-2.31881	-2.03471	1.59874	0.72092	1.2933	0.53669	2.01006	1.04124	-1.45204	-1.20118	-1.04207	-1.87268	-0.58944	-1.19183	-0.52907	-1.3596		0
-0.1381	0.46923	-0.52288	1.03449	1.10204	-1.35373	-0.80119	-0.00327	-0.07949	-0.91572	-0.7206	-1.57514	-1.28981	0.88693	-2.25682	-0.26502	-1.48266	-2.03471	1.59874	1.49107	1.2933	1.98358	2.01006	1.04124	0.99426	1.18722	-1.84397	-1.87268	0.24604	0.41202	-0.52907	0.24656		0
-0.9667	-1.20989	-1.34914	-0.72756	0.25644	-0.51108	-0.80119	-0.00327	-0.07949	-0.01245	0.12754	-0.73154	-0.48695	0.04834	0.14444	-0.26502	0.18965	0.26623	0.22322	0.72092	1.2933	1.98358	2.01006	1.04124	-1.45204	-1.20118	-1.04207	-1.05518	-0.58944	-0.38991	-0.52907	-1.3596		0
-0.1381	-0.37033	-0.52288	-0.72756	-0.58917	-0.51108	-0.80119	-0.8741	-0.99881	-0.91572	-0.7206	-0.73154	-0.48695	-0.79025	-0.65598	-0.26502	-0.6465	-0.50075	1.59874	2.26121	1.2933	1.98358	2.01006	1.04124	-0.63661	-0.40505	-0.24017	-0.23767	-0.58944	-0.38991	-0.52907	-0.55652		0
-1.7953	-1.20989	-0.52288	-0.72756	0.25644	-0.51108	-0.80119	-0.00327	-0.99881	-0.01245	-0.7206	-0.73154	-0.48695	-0.79025	-0.65598	-0.26502	-0.6465	-0.50075	0.22322	0.72092	0.05657	0.53669	0.57725	-0.244	-0.63661	-0.40505	-0.24017	-1.05518	-0.58944	-0.38991	-0.52907	-0.55652		0
0.6905	1.30878	1.12963	1.03449	1.10204	1.17422	0.97232	0.86755	0.83983	-0.01245	0.97568	0.95566	-1.28981	0.88693	-2.25682	-1.02576	0.18965	0.26623	0.91098	1.49107	0.67494	1.26013	1.29366	0.39862	-1.45204	-1.20118	-0.24017	-1.05518	-1.42492	-1.19183	-1.34411	-0.55652		0
-1.7953	-2.04944	-0.52288	-0.72756	-2.28038	-2.19638	-0.80119	-2.61574	-1.91812	-2.72225	-2.41688	-0.73154	-2.09268	-0.79025	-0.65598	-1.78651	-0.6465	-0.50075	1.59874	2.26121	1.2933	1.98358	2.01006	-0.244	-2.26747	-1.99732	-1.84397	-1.05518	-2.2604	-1.99375	-2.15916	-2.16268		0
0.6905	0.46923	0.30338	-0.72756	0.25644	1.17422	-0.80119	-0.00327	-0.07949	-0.01245	0.12754	0.11206	-1.28981	0.04834	-1.4564	0.49572	-1.48266	1.03321	0.91098	0.72092	0.67494	1.26013	2.01006	0.39862	0.17882	-1.20118	-1.04207	-1.05518	0.24604	-1.19183	0.28598	-1.3596		0
-1.7953	-0.37033	-2.1754	-2.48962	-1.43477	-2.19638	-1.68794	-0.8741	-0.99881	-0.91572	-0.7206	-0.73154	-0.48695	-1.62883	0.14444	-1.02576	-1.48266	0.26623	-0.46454	-0.81936	1.2933	1.98358	2.01006	1.04124	-0.63661	-1.99732	-1.84397	-1.87268	-2.2604	-1.99375	-2.15916	-2.16268		0
-0.1381	1.30878	1.12963	1.03449	1.10204	-0.51108	0.97232	0.86755	0.83983	0.89081	0.97568	0.95566	-2.09268	-2.46742	-2.25682	-1.78651	-1.48266	-0.50075	1.59874	-0.04922	1.2933	1.98358	2.01006	1.04124	0.17882	-1.99732	-1.84397	-1.87268	-0.58944	0.41202	-1.34411	0.24656		0
-1.7953	-2.04944	1.12963	0.15346	-1.43477	-1.35373	-2.57469	-0.8741	-0.99881	-0.91572	-1.56874	-1.57514	-1.28981	-1.62883	-1.4564	-1.02576	-1.48266	-2.03471	-0.46454	-0.04922	1.2933	-0.9102	-0.85556	1.04124	-0.63661	-1.20118	-1.84397	-1.05518	-1.42492	-1.19183	-1.34411	-1.3596		0
-0.1381	-0.37033	-0.52288	1.03449	1.10204	-0.51108	-0.80119	0.86755	0.83983	0.89081	0.97568	-0.73154	-0.48695	-1.62883	0.94485	-1.02576	-1.48266	-1.26773	0.22322	-0.04922	1.2933	1.26013	1.29366	1.04124	-1.45204	-0.40505	-0.24017	-1.05518	-1.42492	-1.19183	-1.34411	-0.55652		0
0.6905	0.46923	-0.52288	-0.72756	0.25644	1.17422	0.08556	0.86755	0.83983	0.89081	0.97568	0.95566	0.31591	0.88693	0.14444	0.49572	0.18965	-1.26773	0.22322	0.72092	1.2933	0.53669	2.01006	1.04124	-0.63661	0.39108	-0.24017	-0.23767	-0.58944	0.41202	1.10103	1.04964		0
-1.7953	-2.04944	-2.1754	1.03449	-0.58917	-2.19638	-0.80119	-2.61574	-2.83744	-2.72225	-2.41688	-2.41874	-2.09268	-2.46742	-2.25682	-1.78651	-2.31881	-2.03471	1.59874	2.26121	1.2933	1.98358	2.01006	1.04124	-1.45204	-1.99732	-1.84397	-1.87268	-2.2604	-1.99375	-1.34411	-1.3596		0
1.5191	0.46923	1.12963	0.15346	1.10204	1.17422	0.97232	0.86755	0.83983	0.89081	0.97568	-0.73154	-0.48695	-0.79025	-0.65598	0.49572	-0.6465	-0.50075	1.59874	2.26121	1.2933	1.26013	-0.85556	1.04124	-0.63661	-0.40505	-1.04207	-1.05518	-1.42492	-1.19183	-0.52907	-1.3596		0
-0.9667	-1.20989	-1.34914	-1.60859	-0.58917	-1.35373	-0.80119	-0.8741	-1.91812	-1.81898	-1.56874	-0.73154	-0.48695	-0.79025	-0.65598	-0.26502	0.18965	-0.50075	-0.46454	-0.04922	0.05657	0.53669	-0.13915	-0.244	-2.26747	-1.99732	-0.24017	-1.05518	-0.58944	-0.38991	-0.52907	-0.55652		0
-0.1381	-0.37033	1.12963	1.03449	-0.58917	1.17422	0.97232	0.86755	0.83983	0.89081	0.97568	-0.73154	0.31591	-0.79025	-0.65598	-1.02576	-0.6465	0.26623	-1.1523	0.72092	0.05657	0.53669	0.57725	-0.244	-0.63661	-1.20118	-0.24017	-0.23767	-0.58944	-0.38991	-1.34411	-1.3596		0
1.5191	-0.37033	-0.52288	-0.72756	-0.58917	0.33157	-0.80119	-0.8741	-0.07949	-0.01245	0.12754	0.11206	-0.48695	-1.62883	-0.65598	-0.26502	-0.6465	-0.50075	0.91098	0.72092	0.67494	1.26013	1.29366	-0.244	-0.63661	0.39108	-0.24017	-0.23767	-0.58944	-1.19183	0.28598	0.24656		0
-0.1381	0.46923	0.30338	0.15346	0.25644	0.33157	0.08556	-0.00327	-0.07949	-0.01245	0.12754	-0.73154	-2.09268	0.04834	0.14444	-0.26502	-0.6465	0.26623	0.91098	1.49107	0.67494	1.26013	1.29366	0.39862	-1.45204	-0.40505	-0.24017	-0.23767	-0.58944	-0.38991	0.28598	0.24656		0
-1.7953	-2.04944	-2.1754	-2.48962	-2.28038	-2.19638	-2.57469	-2.61574	-2.83744	-2.72225	-2.41688	-0.73154	-0.48695	-0.79025	-0.65598	-0.26502	-0.6465	-0.50075	0.22322	0.72092	0.05657	0.53669	0.57725	-0.244	-0.63661	-0.40505	-0.24017	-0.23767	-0.58944	-0.38991	-0.52907	-0.55652		0
-1.7953	-2.04944	-2.1754	-2.48962	-2.28038	-2.19638	-2.57469	0.86755	-0.99881	-0.91572	-0.7206	-1.57514	-1.28981	-1.62883	-0.65598	-1.02576	1.02581	-0.50075	0.22322	0.72092	0.05657	0.53669	-0.13915	-0.88663	0.17882	0.39108	-0.24017	-1.05518	-0.58944	-0.38991	-1.34411	-1.3596		0
-0.1381	-0.37033	0.30338	-1.60859	-1.43477	-1.35373	-0.80119	-0.8741	-1.91812	-1.81898	-1.56874	-0.73154	-0.48695	-0.79025	-0.65598	-0.26502	-0.6465	-0.50075	1.59874	2.26121	1.2933	1.98358	1.29366	1.04124	-1.45204	-1.20118	-0.24017	-0.23767	-1.42492	-0.38991	-0.52907	1.04964		0
-0.1381	0.46923	1.12963	-0.72756	-0.58917	-0.51108	-0.80119	-0.00327	-0.07949	-0.01245	0.12754	-0.73154	0.31591	-0.79025	-0.65598	1.25647	-0.6465	-0.50075	0.91098	1.49107	0.67494	1.26013	2.01006	1.04124	-1.45204	-1.20118	-0.24017	-0.23767	-0.58944	0.41202	-1.34411	-0.55652		0
-0.1381	-1.20989	-1.34914	-1.60859	-0.58917	-0.51108	-1.68794	-0.8741	-0.99881	-0.91572	-0.7206	-1.57514	-2.09268	-1.62883	-0.65598	-1.78651	-0.6465	-0.50075	1.59874	0.72092	0.05657	0.53669	1.29366	0.39862	-1.45204	-0.40505	-1.84397	-1.05518	-1.42492	-1.19183	-0.52907	-1.3596		0
-1.7953	-1.20989	-0.52288	0.15346	0.25644	-1.35373	-1.68794	-2.61574	-1.91812	-0.01245	-1.56874	-0.73154	-0.48695	-1.62883	-0.65598	-1.78651	-1.48266	-2.03471	-1.1523	1.49107	1.2933	1.98358	2.01006	1.04124	-1.45204	-1.20118	-0.24017	-1.87268	-1.42492	-1.19183	-2.15916	0.24656		0
1.5191	1.30878	1.12963	1.03449	1.10204	1.17422	0.97232	-0.8741	0.83983	-0.91572	-0.7206	-0.73154	-2.09268	-0.79025	-1.4564	-0.26502	-0.6465	-0.50075	-1.1523	-0.81936	1.2933	-0.9102	-0.85556	1.04124	-1.45204	-1.99732	-1.84397	-1.87268	-1.42492	-1.99375	-0.52907	-0.55652		0
-0.9667	-1.20989	-1.34914	-1.60859	-1.43477	-1.35373	0.08556	-1.74492	-1.91812	-0.91572	-0.7206	-0.73154	-0.48695	-0.79025	-0.65598	-0.26502	-0.6465	-0.50075	1.59874	-0.04922	0.67494	-0.18675	-0.13915	1.04124	-0.63661	-1.20118	-1.84397	-1.87268	-0.58944	-1.99375	-2.15916	-2.16268		0
1.5191	1.30878	1.12963	1.03449	1.10204	1.17422	0.97232	0.86755	0.83983	-1.81898	-1.56874	-0.73154	-0.48695	-0.79025	-1.4564	-0.26502	-1.48266	-0.50075	0.91098	0.72092	1.2933	0.53669	0.57725	0.39862	-1.45204	-1.20118	-1.04207	-1.05518	-0.58944	-1.19183	0.28598	-0.55652		0
-0.9667	-1.20989	-1.34914	-1.60859	-1.43477	-1.35373	-1.68794	-2.61574	-0.99881	-1.81898	-2.41688	-0.73154	-2.09268	-2.46742	-2.25682	-1.78651	-2.31881	-2.03471	-1.1523	2.26121	1.2933	-0.9102	-0.85556	-1.52925	-2.26747	-1.99732	-1.84397	-1.87268	-2.2604	-1.19183	-2.15916	1.04964		0
-0.1381	-0.37033	-0.52288	0.15346	0.25644	-0.51108	0.08556	-0.8741	-0.07949	-0.01245	0.12754	0.11206	0.31591	-1.62883	-1.4564	-1.02576	-0.6465	-0.50075	0.91098	1.49107	0.67494	1.26013	1.29366	0.39862	-1.45204	-1.20118	-1.04207	-0.23767	-1.42492	-0.38991	-0.52907	-0.55652		0
-0.1381	1.30878	-0.52288	1.03449	1.10204	1.17422	0.97232	0.86755	0.83983	0.89081	0.97568	0.95566	1.11878	-1.62883	-1.4564	-1.78651	1.02581	1.03321	-1.1523	2.26121	1.2933	-0.9102	2.01006	1.04124	-1.45204	-1.99732	-1.84397	-1.87268	-1.42492	-1.19183	-1.34411	-0.55652		0
-0.1381	-0.37033	-0.52288	-0.72756	-0.58917	-0.51108	-0.80119	-2.61574	-2.83744	-2.72225	-2.41688	-2.41874	-2.09268	-2.46742	-2.25682	-1.78651	-2.31881	-2.03471	1.59874	0.72092	1.2933	1.98358	2.01006	1.04124	-2.26747	-1.99732	-1.84397	-1.87268	-2.2604	-1.99375	-2.15916	-2.16268		0
-1.7953	-1.20989	-1.34914	-2.48962	-2.28038	-2.19638	-0.80119	-0.8741	-1.91812	-0.91572	-0.7206	-1.57514	-1.28981	-0.79025	-0.65598	-0.26502	-0.6465	-0.50075	0.22322	-0.04922	-0.5618	-0.18675	-0.13915	-0.88663	-0.63661	-0.40505	-1.04207	-1.05518	-0.58944	-1.19183	-2.15916	-1.3596		0
-0.9667	1.30878	1.12963	1.03449	1.10204	1.17422	0.97232	0.86755	0.83983	0.89081	0.97568	-1.57514	-1.28981	-1.62883	-1.4564	-1.02576	-1.48266	-1.26773	-1.1523	-0.81936	-1.18017	-0.9102	-0.85556	1.04124	-1.45204	-1.20118	-1.04207	-1.05518	-1.42492	-1.19183	-1.34411	-1.3596		0
-1.7953	-0.37033	-0.52288	-0.72756	-0.58917	0.33157	-0.80119	-0.00327	-0.99881	-0.91572	0.97568	-0.73154	-0.48695	0.88693	0.94485	-0.26502	0.18965	-0.50075	0.91098	2.26121	1.2933	0.53669	0.57725	1.04124	-0.63661	-0.40505	-0.24017	-0.23767	-0.58944	-0.38991	-0.52907	-0.55652		0
-1.7953	-2.04944	-0.52288	-2.48962	-2.28038	-0.51108	-0.80119	-0.8741	-1.91812	-0.91572	0.12754	0.11206	-0.48695	-2.46742	-1.4564	-1.78651	-2.31881	-2.03471	0.22322	-0.81936	1.2933	0.53669	0.57725	0.39862	-1.45204	-1.20118	-1.04207	-0.23767	-1.42492	-0.38991	-0.52907	-1.3596		0
1.5191	1.30878	1.12963	1.03449	1.10204	-0.51108	0.97232	-0.8741	-1.91812	0.89081	-0.7206	-2.41874	-2.09268	-0.79025	-1.4564	-1.78651	-0.6465	-0.50075	-1.1523	-0.81936	-1.18017	-0.9102	-0.85556	-1.52925	-0.63661	-0.40505	-1.04207	-0.23767	-1.42492	-0.38991	-1.34411	0.24656		0
-1.7953	-1.20989	-1.34914	-1.60859	-1.43477	-1.35373	-1.68794	-0.00327	-0.07949	0.89081	0.97568	-1.57514	-1.28981	-1.62883	-2.25682	-1.78651	-2.31881	-1.26773	1.59874	1.49107	1.2933	1.26013	2.01006	1.04124	-1.45204	-1.20118	-1.84397	-1.05518	-0.58944	-0.38991	-0.52907	-0.55652		0
-0.9667	-1.20989	-1.34914	-1.60859	-1.43477	-1.35373	-1.68794	0.86755	0.83983	0.89081	0.97568	-0.73154	-1.28981	-1.62883	-2.25682	-1.02576	-1.48266	1.03321	-1.1523	-0.81936	-1.18017	-0.9102	-0.85556	-1.52925	-0.63661	-0.40505	-0.24017	-1.05518	-0.58944	-0.38991	-0.52907	-1.3596		0
-1.7953	-1.20989	-0.52288	0.15346	-0.58917	-2.19638	-1.68794	-0.8741	-0.99881	-0.91572	-1.56874	0.11206	-2.09268	-2.46742	-2.25682	-1.78651	0.18965	0.26623	-1.1523	-0.81936	-1.18017	-0.9102	2.01006	-1.52925	-0.63661	-0.40505	-0.24017	-1.87268	1.08151	-1.99375	-0.52907	0.24656		0
0.6905	0.46923	-0.52288	1.03449	1.10204	0.33157	0.97232	-0.00327	-0.07949	-0.01245	0.12754	-0.73154	-0.48695	-0.79025	-0.65598	-0.26502	-0.6465	-0.50075	0.91098	1.49107	1.2933	0.53669	2.01006	1.04124	-2.26747	-1.99732	-1.04207	-1.87268	-0.58944	-0.38991	-0.52907	-0.55652		0
-1.7953	-2.04944	-1.34914	0.15346	-1.43477	-2.19638	-0.80119	-0.00327	-0.07949	-0.01245	0.12754	-1.57514	-1.28981	-1.62883	-1.4564	-1.02576	-0.6465	-0.50075	1.59874	2.26121	1.2933	1.98358	2.01006	1.04124	-1.45204	-1.20118	-1.04207	-1.05518	-1.42492	-0.38991	-0.52907	-0.55652		0
-0.1381	-0.37033	1.12963	-0.72756	1.10204	0.33157	0.97232	0.86755	0.83983	0.89081	0.97568	-2.41874	-0.48695	-0.79025	-0.65598	-0.26502	-0.6465	-0.50075	0.22322	-0.81936	0.05657	-0.9102	-0.85556	-0.244	0.99426	1.18722	-0.24017	-1.87268	0.24604	-1.99375	1.10103	0.24656		0
-0.1381	0.46923	0.30338	0.15346	0.25644	-0.51108	0.08556	-0.00327	-0.07949	-0.01245	0.12754	-2.41874	-0.48695	-2.46742	-2.25682	-0.26502	-2.31881	-0.50075	-0.46454	0.72092	0.05657	1.26013	2.01006	0.39862	-0.63661	-1.20118	-0.24017	-1.05518	-1.42492	-1.19183	-1.34411	-0.55652		0
-0.1381	-0.37033	-0.52288	-0.72756	-0.58917	-0.51108	0.97232	-2.61574	-2.83744	-2.72225	-2.41688	-2.41874	-2.09268	-2.46742	-2.25682	-1.78651	-2.31881	-2.03471	-1.1523	-0.81936	-1.18017	-0.9102	2.01006	-1.52925	-2.26747	-1.99732	-0.24017	-1.87268	-2.2604	-1.99375	-2.15916	-0.55652		0
-1.7953	-1.20989	-0.52288	-0.72756	-0.58917	-0.51108	-0.80119	-0.8741	-0.99881	-0.91572	-0.7206	-0.73154	-1.28981	-1.62883	-1.4564	-1.02576	-2.31881	-2.03471	0.22322	-0.04922	-0.5618	-0.18675	1.29366	0.39862	-0.63661	-1.20118	-1.84397	-1.87268	-1.42492	-1.19183	-2.15916	-2.16268		0
-1.7953	-0.37033	-2.1754	-0.72756	-1.43477	-1.35373	-0.80119	-1.74492	-1.91812	-0.91572	-0.7206	-2.41874	-2.09268	0.04834	-2.25682	-1.02576	0.18965	0.26623	0.22322	1.49107	0.05657	1.26013	2.01006	-0.88663	-1.45204	-1.99732	-1.84397	-1.87268	-0.58944	-1.99375	-2.15916	-2.16268		0
-1.7953	1.30878	1.12963	1.03449	1.10204	1.17422	0.97232	-2.61574	-2.83744	-2.72225	-2.41688	0.95566	-2.09268	-2.46742	-2.25682	-1.78651	1.02581	-2.03471	-1.1523	2.26121	1.2933	1.98358	2.01006	1.04124	-0.63661	-1.99732	-1.04207	-1.05518	-1.42492	-1.19183	-1.34411	-2.16268		0
-0.1381	0.46923	0.30338	0.15346	-0.58917	0.33157	0.08556	-0.8741	-0.99881	-0.01245	-0.7206	-0.73154	0.31591	-2.46742	-2.25682	-1.78651	-2.31881	0.26623	0.22322	0.72092	0.67494	1.26013	1.29366	0.39862	-0.63661	-0.40505	-0.24017	-1.05518	-1.42492	-1.19183	-0.52907	-0.55652		0
-1.7953	-2.04944	-2.1754	-2.48962	-2.28038	-2.19638	-2.57469	0.86755	0.83983	0.89081	-2.41688	-2.41874	-2.09268	-2.46742	-2.25682	-1.78651	-2.31881	-2.03471	1.59874	-0.81936	-1.18017	-0.9102	-0.85556	-1.52925	-1.45204	-1.20118	-1.04207	-1.05518	-1.42492	-1.99375	-1.34411	-1.3596		0
1.5191	0.46923	1.12963	0.15346	1.10204	1.17422	0.08556	0.86755	-0.07949	0.89081	0.12754	0.95566	0.31591	0.88693	0.14444	1.25647	1.02581	0.26623	1.59874	1.49107	1.2933	1.26013	2.01006	1.04124	-2.26747	0.39108	-1.04207	0.57983	-1.42492	-1.19183	-1.34411	-1.3596		0
-0.1381	-0.37033	-1.34914	-1.60859	-1.43477	-1.35373	-0.80119	-0.8741	-0.99881	-0.91572	-0.7206	-0.73154	-0.48695	-0.79025	-0.65598	-0.26502	-0.6465	-0.50075	0.22322	1.49107	0.05657	0.53669	1.29366	0.39862	-0.63661	-1.20118	-1.04207	-1.05518	-1.42492	-1.19183	-1.34411	-0.55652		0
0.6905	1.30878	1.12963	1.03449	1.10204	1.17422	0.97232	0.86755	0.83983	0.89081	0.12754	-0.73154	-1.28981	0.88693	0.94485	-0.26502	1.02581	-2.03471	-0.46454	-0.04922	0.67494	0.53669	2.01006	1.04124	-1.45204	-1.20118	-1.04207	-1.05518	-0.58944	-0.38991	-0.52907	-1.3596		0
-0.1381	-0.37033	-0.52288	-0.72756	-0.58917	-0.51108	-0.80119	-0.8741	-0.99881	-0.91572	-0.7206	-0.73154	-2.09268	0.04834	0.14444	0.49572	-0.6465	-2.03471	0.91098	-0.04922	0.05657	1.26013	1.29366	-0.244	-0.63661	0.39108	-0.24017	-0.23767	-0.58944	-0.38991	-0.52907	-0.55652		0
0.6905	-0.37033	-0.52288	1.03449	-0.58917	-0.51108	-0.80119	-0.00327	-0.99881	-0.01245	0.97568	-2.41874	-1.28981	0.04834	0.94485	-1.78651	-2.31881	-2.03471	1.59874	2.26121	0.67494	1.26013	0.57725	-0.244	-2.26747	-1.20118	-0.24017	-1.05518	-1.42492	-1.99375	-2.15916	-2.16268		0
-0.1381	-0.37033	-0.52288	-0.72756	-0.58917	-1.35373	-0.80119	-1.74492	-1.91812	-1.81898	-1.56874	-1.57514	-1.28981	-1.62883	-1.4564	-1.02576	-1.48266	-1.26773	-1.1523	-0.81936	-1.18017	-0.9102	-0.85556	-1.52925	-1.45204	-1.20118	-1.04207	-1.05518	-1.42492	-1.19183	-1.34411	-1.3596		0
-0.1381	1.30878	1.12963	1.03449	1.10204	1.17422	0.97232	0.86755	0.83983	0.89081	0.97568	-0.73154	-0.48695	-0.79025	-2.25682	1.25647	1.02581	-0.50075	-1.1523	-0.81936	-1.18017	-0.9102	-0.85556	-1.52925	-1.45204	-0.40505	-1.04207	-1.87268	-2.2604	-1.19183	-2.15916	-2.16268		0
-0.1381	-0.37033	-0.52288	-0.72756	-0.58917	-0.51108	-0.80119	-2.61574	-2.83744	-2.72225	-2.41688	-2.41874	-2.09268	-2.46742	-2.25682	0.49572	0.18965	0.26623	1.59874	2.26121	1.2933	1.98358	2.01006	1.04124	-1.45204	-1.20118	-1.04207	-1.05518	-1.42492	-1.19183	-1.34411	-1.3596		0
-1.7953	-1.20989	-0.52288	0.15346	1.10204	1.17422	0.08556	0.86755	-0.07949	-0.91572	-1.56874	-0.73154	-1.28981	-2.46742	0.14444	-0.26502	-2.31881	-1.26773	1.59874	0.72092	-1.18017	0.53669	1.29366	-0.88663	-1.45204	0.39108	-0.24017	-1.05518	-1.42492	-0.38991	-1.34411	1.04964		0
-0.1381	-0.37033	-0.52288	-0.72756	-0.58917	-0.51108	-0.80119	-0.8741	-0.99881	-0.91572	-0.7206	0.95566	-1.28981	-1.62883	-1.4564	-1.02576	-1.48266	1.03321	0.91098	1.49107	0.67494	1.26013	1.29366	0.39862	-1.45204	-1.20118	-1.04207	0.57983	-2.2604	-1.19183	-1.34411	0.24656		0
-0.1381	-0.37033	0.30338	-0.72756	-0.58917	-1.35373	-0.80119	-2.61574	-2.83744	-2.72225	-2.41688	-2.41874	-2.09268	-2.46742	-2.25682	-1.78651	-2.31881	-2.03471	1.59874	1.49107	1.2933	1.26013	1.29366	1.04124	-2.26747	-1.99732	-0.24017	-1.87268	-0.58944	-1.19183	-2.15916	-1.3596		0
-0.9667	-1.20989	-0.52288	-0.72756	-0.58917	-1.35373	-1.68794	0.86755	0.83983	0.89081	0.12754	-1.57514	-2.09268	-2.46742	-2.25682	-1.02576	-1.48266	1.03321	1.59874	0.72092	1.2933	1.98358	2.01006	1.04124	-1.45204	-1.20118	-1.04207	-0.23767	-2.2604	-0.38991	-0.52907	0.24656		0
-1.7953	-1.20989	-1.34914	-0.72756	-2.28038	1.17422	-1.68794	-2.61574	-0.99881	0.89081	-1.56874	-1.57514	-0.48695	-2.46742	-1.4564	-1.78651	-0.6465	1.03321	-0.46454	-0.81936	0.05657	1.26013	-0.13915	-0.244	-1.45204	-1.99732	-1.04207	-0.23767	-0.58944	-1.19183	-1.34411	-0.55652		0
-0.1381	0.46923	-0.52288	1.03449	-0.58917	0.33157	-0.80119	-0.00327	-0.99881	-0.01245	0.12754	-0.73154	-1.28981	-2.46742	-2.25682	1.25647	-0.6465	0.26623	0.22322	1.49107	0.05657	1.26013	2.01006	-0.244	-0.63661	-1.20118	-0.24017	-1.87268	-0.58944	-1.99375	-0.52907	-2.16268		0
-0.1381	-0.37033	-0.52288	-0.72756	-0.58917	-0.51108	0.08556	-0.8741	-0.99881	-0.91572	-0.7206	-0.73154	-0.48695	-2.46742	-0.65598	-0.26502	-0.6465	-0.50075	0.91098	-0.04922	-0.5618	0.53669	0.57725	-0.244	-1.45204	-0.40505	-0.24017	-0.23767	-0.58944	-0.38991	-0.52907	-0.55652		0
1.5191	0.46923	0.30338	0.15346	0.25644	1.17422	0.97232	0.86755	0.83983	0.89081	0.97568	0.11206	-0.48695	-0.79025	-0.65598	-1.78651	0.18965	0.26623	0.91098	1.49107	0.05657	1.26013	2.01006	-1.52925	-1.45204	-0.40505	-1.84397	-0.23767	-2.2604	-1.19183	-1.34411	-0.55652		0
-0.1381	-0.37033	-0.52288	-0.72756	-0.58917	-0.51108	-0.80119	-0.8741	-0.99881	-0.91572	-0.7206	-0.73154	-0.48695	-0.79025	-0.65598	-0.26502	-0.6465	-0.50075	0.22322	0.72092	-0.5618	-0.18675	0.57725	-0.244	-1.45204	-1.20118	-1.04207	-1.05518	-1.42492	-1.19183	-1.34411	-0.55652		0
